# Supplementary material for: Selenium-rich royal jelly inhibits hepatocellular carcinoma through PI3K/AKT and VEGF pathways in H22 tumor-bearing mice
Source: Royal Society of Chemistry journal article supplement (doi:10.1039/d1fo01070k), 2021-01-01
Supplement: d1fo01070k16.xlsx [file d1fo01070k16.xlsx]

## Sheet: all.cor.matrix
var	Muribaculaceae	Lachnospiraceae	Bacteroidaceae	Lactobacillaceae	Ruminococcaceae	Prevotellaceae	Rikenellaceae	Tannerellaceae	Burkholderiaceae	Erysipelotrichaceae	Enterobacteriaceae	Bifidobacteriaceae	Eggerthellaceae	Marinifilaceae	unidentified_Bacteria	Anaeroplasmataceae	unidentified_Clostridiales	Streptococcaceae	Helicobacteraceae	Akkermansiaceae	Veillonellaceae	Desulfovibrionaceae	Porphyromonadaceae	Neisseriaceae	Peptostreptococcaceae	Peptococcaceae	Deferribacteraceae	Pseudomonadaceae	Pasteurellaceae	unidentified_Melainabacteria	Enterococcaceae	Fusobacteriaceae	Campylobacteraceae	Micrococcaceae	Synergistaceae	Orbaceae	Carnobacteriaceae	Christensenellaceae	Spirochaetaceae	Leptotrichiaceae	unidentified_Cyanobacteria	unidentified_Bacillales	Defluviitaleaceae	Coriobacteriaceae	Atopobiaceae	Halomonadaceae	Actinomycetaceae	Caulobacteraceae	Paludibacteraceae
N-Acetylvaline	0.17598	-0.14353	-0.013457	0.449608	-0.376137	0.217251	-0.357206	-0.0681962	-0.250316	-0.373339	0.287502	-0.0465203	-0.334581	0.747431	-0.2193	-0.0726361	-0.481924	-0.0603717	0.00926935	0.28946	-0.0924444	-0.0356294	-0.0033573	-0.195575	0.252809	-0.0461857	-0.0678092	-0.0778297	-0.346569	-0.303227	-0.0501784	-0.107791	-0.391499	-0.110275	0.0636617	-0.0990279	-0.101634	0.354425	0.0722564	-0.0293388	-0.507401	-0.060718	0.0615913	0.308392	0.0362942	-0.385054	-0.283568	0.445304	-0.0566077
Methoxyacetyl fentanyl-d5	0.0527161	0.210296	-0.221627	0.363721	-0.0616509	-0.42737	-0.211757	-0.154037	-0.151304	0.201543	0.318967	0.346613	0.146714	0.204898	0.0416544	-0.0559494	0.320557	0.408151	-0.0505866	0.345455	0.390718	-0.186387	0.0465031	-0.474788	0.355628	-0.222519	0.0441003	0.433792	-0.388851	-0.202424	0.355	-0.174246	0.034144	-0.104465	0.378801	0.402022	-0.0302986	0.268926	0.290837	-0.236197	0.0396689	0.0134825	0.128842	0.30238	0.287646	-0.121238	-0.28347	0.380137	-0.166646
Isobutyryl carnitine	-0.341908	0.13151	0.045659	0.102813	-0.191505	0.229372	0.292803	-0.188595	-0.502683	-0.281029	-0.0714267	-0.0385329	-0.270837	0.349732	-0.273764	-0.0702009	0.377824	-0.0178136	0.358631	-0.0734436	0.104532	0.243378	0.218939	0.0927228	0.0636899	-0.0303411	0.401556	0.404563	-0.0902637	-0.340012	-0.0410315	-0.136711	0.169765	-0.0992769	0.00789775	0.397112	-0.0651183	-0.105974	-0.0170276	0.0404003	-0.205326	0.0752095	0.0630439	-0.0900045	0.252698	-0.111791	0.136878	-0.161312	0.193451
LPC 22:6	0.600301	-0.33502	-0.119626	0.541303	-0.467806	-0.107427	-0.264371	-0.0995434	-0.200962	-0.00464683	0.663363	0.24263	-0.0479998	0.480594	0.00952539	-0.0902284	-0.286555	0.151937	0.13308	0.660333	-0.193348	-0.19123	-0.328644	-0.792739	0.61787	-0.262434	-0.197641	-0.0466324	-0.677855	-0.200134	0.231058	0.36714	-0.501374	-0.552014	-0.138362	-0.0895585	-0.412707	0.393027	-0.0808202	-0.217607	-0.335008	-0.177549	-0.0341853	0.68747	0.135132	-0.00753216	-0.0347026	0.715118	-0.421973
Ouabain	0.101155	-0.0367686	0.101786	-0.150721	0.0867919	0.0651789	-0.0547867	-0.20596	-0.325536	-0.0340259	0.0498427	0.264419	0.0797562	-0.150345	0.152032	-0.516978	-0.283066	0.194162	-0.389147	0.0485439	-0.131776	-0.239016	0.0639433	0.162211	0.00573105	0.23345	-0.377097	0.241463	-0.123318	-0.26624	0.256268	0.0679662	0.205006	-0.122171	-0.270885	0.286266	0.0515546	0.145163	-0.0728052	0.107439	-0.349341	-0.112931	0.235071	0.0288417	0.0247467	-0.061722	-0.0919186	0.0766017	0.046301
ethyl 4-methyl-2-(1H-pyrrol-1-yl)-1,3-thiazole-5-carboxylate	0.47293	-0.568795	0.416814	0.200369	-0.163144	-0.0803756	-0.394183	-0.167555	0.197053	-0.0682633	0.363772	0.33174	-0.12237	-0.0959012	-0.134169	-0.427936	-0.502534	0.22896	-0.462264	0.356157	-0.0604906	-0.772417	-0.189092	-0.286673	0.212058	-0.109682	-0.632224	0.318908	-0.213713	0.399606	0.327113	0.0021754	-0.0391446	-0.245056	-0.141123	0.335361	-0.160491	0.18171	-0.0511032	-0.275153	0.150595	-0.540723	-0.0171856	0.346925	0.161296	-0.297616	-0.251028	0.421019	-0.52655
PC (20:3/20:3)	-0.365835	0.219708	-0.0962268	-0.111648	0.332074	-0.0759267	-0.0895399	0.0923903	0.192482	0.468549	0.084843	0.28168	0.385611	0.177041	0.341812	0.189007	0.184742	0.275517	-0.0224026	0.100531	-0.309828	0.334198	-0.43956	0.0379055	-0.0867431	-0.0695288	0.303833	0.0471598	0.100014	0.106578	0.278797	-0.149999	-0.374883	0.0899673	-0.162985	0.0391734	-0.167759	-0.0413802	-0.508206	-0.611974	0.280679	0.234854	-0.359325	0.0513177	-0.146987	0.216111	-0.141159	-0.137193	0.242662
p-Mentha-1,3,8-triene	0.37058	-0.559206	0.347974	0.271594	-0.695341	0.231574	0.25978	-0.109463	-0.193109	-0.378598	0.0993654	-0.169937	-0.335953	0.0688429	-0.312053	-0.0646239	-0.16739	-0.225853	0.322499	0.0858836	0.0243666	-0.370498	0.207325	-0.406815	0.220396	-0.332018	-0.0655549	0.168408	-0.274546	-0.0481714	-0.177888	0.118728	0.0492499	-0.289305	-0.143775	0.161536	-0.285218	-0.255441	0.221685	0.288158	-0.186716	-0.193725	0.214436	0.113082	0.234479	-0.0819514	0.0223832	0.245813	-0.357719
6 β-Hydroxycortisol	-0.0271831	-0.143375	0.223316	0.0171266	-0.314065	0.0830765	0.132915	-0.0303306	-0.115171	-0.0476532	0.00395671	-0.0542822	0.0612364	0.228192	0.0592826	-0.0376541	-0.00471459	-0.019018	0.215958	-0.0172473	0.221444	-0.191162	0.151632	-0.091207	-0.021332	-0.478665	-0.144839	0.270092	0.120296	-0.0946404	-0.0501448	-0.435961	0.0126835	0.272354	0.129958	0.261099	-0.18266	-0.303161	0.232036	-0.150576	0.292983	0.0436315	0.237201	0.019071	-0.0197233	-0.121668	-0.397082	-0.0816735	-0.0946038
SM (d24:2/12:0)	0.254975	-0.179013	0.129472	-0.102914	-0.275316	0.08144	0.187152	-0.0485451	0.145075	-0.236849	-0.199054	-0.201981	-0.229015	-0.189698	-0.248452	-0.16776	-0.0660104	-0.215404	0.0293405	-0.205522	-0.0685713	0.0195882	0.0969503	0.142136	-0.171513	0.412028	0.0379947	0.0885235	-0.127398	0.0082883	-0.206423	-0.277985	0.0803564	-0.0948518	-0.0573979	0.103977	0.0404964	-0.0705879	0.0459386	0.147443	-0.20968	-0.164005	0.200404	-0.183188	0.00648083	-0.102205	0.104723	0.0800723	-0.03602
Stiripentol	-0.552784	0.293431	0.0570501	0.10533	-0.283308	0.346428	0.206639	-0.0446517	-0.33357	-0.255657	-0.407526	-0.441572	-0.229267	0.148194	-0.22696	0.0989742	0.313272	-0.345963	0.139881	-0.407063	0.47438	0.240485	0.629144	0.181049	-0.108952	-0.243239	0.258706	0.111062	0.016202	-0.233423	-0.430775	-0.304813	0.434248	0.0670947	0.402262	0.112851	0.126474	-0.205302	0.4524	0.434234	-0.0797555	0.0303037	0.255821	-0.407055	0.255054	-0.0901488	0.287521	-0.292571	0.256514
PC (20:2/22:6)	-0.267686	0.532596	-0.446054	-0.161634	0.465414	-0.374171	-0.26522	0.340434	0.240405	0.72614	0.0367343	0.237358	0.620383	-0.104841	0.577556	0.40209	0.219029	0.306614	-0.206243	0.0555282	0.124344	0.329349	-0.157382	-0.116404	0.0175321	-0.345557	0.0724183	-0.178728	0.192806	-0.0206897	0.247022	-0.148631	-0.16969	0.411212	0.165188	-0.189725	-0.000278259	-0.0233263	0.0136063	-0.299299	0.385262	0.348513	-0.0524508	0.0242021	-0.116839	0.219972	-0.0672734	-0.148389	0.104672
PC (14:1e/26:4)	-0.290508	0.253006	-0.0656397	0.0800734	0.244944	-0.234437	0.160262	-0.0130833	-0.282765	-0.123641	-0.0747754	-0.0503112	0.0485036	-0.0185956	0.0169195	-0.104713	0.294421	-0.0330199	0.00404064	-0.081159	0.0651704	0.0215684	-0.18293	0.00447257	-0.229648	0.347475	0.0422155	0.384834	-0.0181478	-0.293166	-0.0489432	0.0390186	0.138826	-0.126245	0.186661	0.395424	0.121412	0.250849	-0.29625	-0.343087	-0.103983	-0.107759	-0.389987	-0.0870944	-0.294311	0.307495	-0.0442218	-0.123652	0.120989
SM (d17:2/24:1)	-0.28165	-0.0370401	0.196606	-0.0544055	0.288889	-0.0141799	0.0424687	-0.0659099	0.176309	0.229912	-0.167599	-0.050899	0.120866	-0.212217	0.075249	-0.0872439	0.218527	-0.123375	-0.198491	-0.176842	-0.203519	0.0811388	-0.280006	0.337448	-0.235098	-0.0581873	-0.0171711	0.284479	0.363453	0.449563	-0.0582023	-0.100844	0.115067	-0.0597457	-0.29686	0.29418	-0.190417	-0.248761	-0.474091	-0.400571	0.567017	-0.218355	-0.419014	-0.192206	0.0385037	0.11204	0.240356	-0.35457	-0.037735
Desoxycortone	-0.154995	-0.42419	0.589158	0.225577	-0.444838	0.364595	-0.107059	-0.000618981	0.115972	-0.242891	-0.140645	-0.16051	-0.34318	-0.0968739	-0.303318	-0.0599163	-0.433644	-0.194551	-0.310204	-0.148749	0.0700519	-0.319041	0.242403	0.110304	-0.0361105	-0.3884	-0.121172	0.234887	0.190013	0.333143	-0.161678	-0.541573	0.115077	0.249909	-0.108466	0.284345	-0.200345	-0.358728	0.0893316	-0.0153451	0.122963	-0.261596	0.0094728	-0.171672	0.405488	-0.427459	-0.0054792	0.0157431	-0.271208
dihydrotachysterol	0.229001	-0.130559	-0.0326833	-0.0399019	-0.243927	0.223461	0.106345	0.0537551	-0.191931	-0.104163	-0.145034	-0.151184	-0.179768	-0.133742	-0.128633	-0.0366159	0.0310387	-0.15311	0.0817271	-0.133295	0.224609	-0.0975323	0.527136	-0.0723874	0.188197	-0.279863	-0.0347928	-0.00776415	-0.108125	-0.161331	-0.151974	0.140593	0.304602	0.0534471	-0.0886271	-0.0176763	0.0925836	-0.389546	0.531663	0.673556	-0.197692	0.041166	0.649418	-0.143836	0.324628	-0.249563	0.240007	0.0120346	-0.0740254
Tetranor-12(S)-HETE	0.236281	-0.201751	0.169289	0.0450076	-0.450515	0.188902	0.106241	-0.0893104	-0.201162	-0.401049	-0.0762425	-0.179871	-0.256273	0.0750816	-0.220299	-0.0823132	-0.268588	-0.15196	0.108614	-0.0821593	0.23205	-0.305657	0.473924	-0.0700216	0.0348218	-0.134468	-0.189435	0.0025797	-0.108583	-0.228902	-0.17673	-0.0644747	0.214986	0.0115949	0.146204	0.00808359	0.0497894	-0.0700252	0.537673	0.565869	-0.302201	-0.0316356	0.470325	-0.0502471	0.0801516	-0.205361	-0.216	0.117572	-0.110642
D-Erythro-sphingosine 1-phosphate	0.129235	-0.250298	0.405082	0.0916075	-0.469351	0.092111	-0.0525842	-0.159134	-0.0153897	-0.580818	0.124769	0.0188639	-0.446896	0.0582961	-0.465587	-0.130787	-0.436717	0.062971	-0.0130677	0.0903669	0.300328	-0.449818	0.23882	-0.0874063	0.0403486	0.0870283	-0.301629	0.0382917	-0.0800818	0.0621922	0.0291654	-0.267662	0.131817	-0.0102491	0.401711	0.0752247	0.0322452	0.364752	0.306949	0.124782	-0.164479	-0.312855	0.0221677	0.145843	0.076324	-0.260897	-0.223643	0.185451	-0.275698
PC (20:5/20:5)	0.441594	-0.275582	-0.128491	0.511004	-0.191414	-0.105039	-0.163808	-0.352367	-0.366723	-0.00188053	0.785147	0.502282	-0.00642609	0.237141	0.0876767	-0.336237	-0.172034	0.467216	0.119567	0.792438	-0.0156579	-0.372639	-0.234343	-0.496464	0.780945	-0.121881	-0.227053	-0.358571	-0.44616	-0.149574	0.500339	0.700289	-0.327829	-0.251425	-0.0194537	-0.383567	-0.0180339	0.486025	0.0246158	-0.113935	-0.323554	0.145468	-0.025815	0.787118	0.307015	-0.0556514	-0.124743	0.743362	-0.169079
Deoxycorticosterone	0.0757875	0.041108	0.0470078	-0.256857	-0.112581	0.189332	-0.0140899	-0.186829	-0.128608	0.020543	-0.0659733	0.122879	0.0485967	-0.193057	0.060643	-0.215884	-0.114975	0.165547	-0.125536	-0.0562347	0.31377	-0.205036	0.588316	-0.0163127	0.162772	-0.0514223	-0.103178	-0.115298	-0.227146	-0.0982176	0.129988	0.00934277	0.390207	0.019213	0.124999	-0.0909395	0.231392	-0.0461481	0.607754	0.657499	-0.212969	0.112337	0.687582	-0.0687127	0.277724	-0.224019	0.00337996	0.0600087	0.144091
PC (19:1/20:5)	-0.314026	0.437764	-0.39809	-0.206454	0.581956	-0.248118	-0.156015	0.611534	0.33374	0.442458	-0.313874	-0.207383	0.361444	-0.100015	0.362612	0.525284	0.185294	-0.166726	-0.147529	-0.300143	-0.0876377	0.486267	-0.252298	0.170272	-0.383735	-0.0771761	0.180081	-0.0940601	0.459767	-0.0147057	-0.204042	-0.227051	-0.211088	0.546534	-0.0019532	-0.106909	0.0855365	-0.268399	-0.239903	-0.335718	0.323521	0.230296	-0.245409	-0.320919	-0.430213	0.193588	0.0146098	-0.406368	0.154389
SM (d14:1/20:1)	-0.000529057	0.190809	-0.12759	-0.108087	-0.0321059	-0.00418423	0.0631379	-0.0197349	-0.0188313	0.0246728	-0.290983	-0.255786	0.0863981	-0.117533	0.034224	0.0562126	0.247987	-0.160461	0.0355965	-0.273127	0.508765	-0.139181	0.60167	-0.00874536	-0.0647474	-0.226483	-0.0860642	-0.0609905	-0.0372787	-0.0772792	-0.241935	0.028507	0.456218	0.0438594	0.412133	-0.0878452	0.292103	-0.184921	0.754085	0.666755	0.104936	0.0778374	0.577952	-0.268389	0.0482141	-0.032925	-0.0520189	-0.120828	0.106587
5-Aminosalicylic Acid	-0.218098	0.502224	-0.354111	0.0313516	0.124396	-0.150554	0.0566126	-0.272931	-0.0832628	0.254211	-0.211704	-0.208218	0.226911	0.11913	0.193447	0.00210002	0.419172	-0.125237	0.0590426	-0.206594	0.244637	0.491246	0.241834	0.463657	-0.046761	-0.0436305	0.211057	-0.101134	0.251329	-0.0642598	-0.202715	-0.379046	0.22257	0.187093	0.194428	-0.127455	0.0291714	-0.0365698	0.298436	0.179939	0.282714	0.304833	0.190876	-0.174806	0.203718	-0.10492	0.0479872	-0.196314	0.249595
PC (20:1/20:4)	0.347755	-0.170498	0.0144949	0.0782944	0.0917352	-0.219874	-0.175749	0.0584625	0.0666308	-0.271404	0.111592	-0.147323	-0.276304	0.027694	-0.259079	-0.0573076	-0.236152	-0.20852	-0.0115708	0.0711647	-0.0876422	-0.0524802	-0.262483	-0.152414	-0.0089264	0.391023	-0.0958172	0.18014	-0.0534469	0.136226	-0.154672	-0.0738654	-0.0533885	-0.122259	-0.0878328	0.19123	-0.0905494	0.280969	-0.252399	-0.261998	-0.0256337	-0.398237	-0.327028	0.142736	-0.155364	-0.22905	0.141059	0.0714823	-0.34825
5-Methyluridine	-0.108548	0.445891	-0.350239	-0.234239	0.143163	-0.159866	-0.00750913	0.222347	0.0149666	0.266057	-0.240074	0.0269768	0.0688478	-0.0020488	-0.0193218	0.22115	0.504472	0.0536402	-0.0232292	-0.2317	0.179605	0.439873	0.182019	0.241617	-0.0806329	-0.307126	0.0327275	0.337448	0.233009	-0.12968	0.0290068	-0.285331	0.218784	0.119345	0.0142443	0.301557	-0.111102	-0.261572	0.180099	0.128829	0.306959	-0.0274378	0.318691	-0.242281	0.170159	-0.0365123	0.313467	-0.405377	-0.0811312
PE (14:0e/22:2)	-0.379698	0.115108	0.0775534	-0.0567766	0.39589	-0.11322	0.189484	0.018919	-0.0755303	0.157693	-0.217046	-0.0820654	0.231649	-0.345508	0.211034	-0.15808	0.340317	-0.0899228	-0.150286	-0.215932	0.0339412	-0.0634712	-0.1521	0.158015	-0.286761	0.139081	-0.00890635	0.304024	0.202737	0.0474971	-0.0814229	0.058121	0.243759	0.0588174	-0.0103917	0.324468	0.154682	-0.158753	-0.314753	-0.341137	0.258434	-0.0579388	-0.315858	-0.250636	-0.188103	0.299203	0.0727963	-0.278832	0.173486
Acetylcholine	0.306813	-0.482282	0.347684	0.031488	-0.0838189	-0.0545158	-0.124352	-0.0425571	0.28113	0.0400358	0.331056	0.320945	0.154204	-0.124746	0.177582	-0.201237	-0.554067	0.255503	-0.2212	0.325776	-0.3363	-0.543366	-0.444426	-0.170885	0.00108706	0.0426187	-0.428098	-0.131734	-0.0150201	0.245271	0.316883	0.109939	-0.379894	-0.00568298	-0.180827	-0.105342	-0.113114	0.153368	-0.31581	-0.423237	0.0432586	-0.0907465	-0.253538	0.321961	-0.254849	0.13595	-0.516389	0.345773	-0.197815
Mesterolone	-0.323939	0.245009	-0.0408244	-0.595321	0.474102	0.115797	0.0800471	0.184799	0.574324	0.286548	-0.55024	-0.368521	0.193963	-0.300353	0.102178	0.353153	0.284359	-0.315741	0.0711538	-0.547662	0.00174528	0.407239	0.155143	0.321409	-0.466042	0.25419	0.455225	-0.274667	0.254358	0.51913	-0.362396	-0.150064	0.207022	0.125096	0.0458407	-0.273794	0.244069	-0.355876	0.0303799	0.236286	0.462592	0.112327	0.0128817	-0.541465	-0.23877	0.0766958	0.299903	-0.578935	0.402156
PC (17:1/18:2)	0.152087	0.016271	-0.0256172	-0.0141869	-0.129943	0.0764958	-0.255879	0.0937488	0.0522038	-0.133573	0.108884	0.217585	-0.2308	-0.0601139	-0.264745	-0.163414	0.0130712	0.243116	-0.285814	0.119163	0.340542	-0.335281	0.219334	-0.022806	0.165398	-0.19386	-0.640442	-0.0953401	-0.159189	0.0271442	0.231657	0.325898	0.163631	-0.208951	0.406151	-0.123454	0.252605	0.275439	0.399469	0.2879	-0.0096126	-0.393968	0.35261	0.103317	0.123552	-0.00602028	0.214138	0.119796	-0.194444
10E,12Z-Octadecadienoic acid	0.0349855	-0.34607	0.400081	-0.0493405	-0.643652	0.337763	0.385275	-0.199322	-0.175165	-0.172226	0.0911533	0.117992	-0.126389	-0.0460432	-0.109712	-0.0736694	-0.117681	0.145548	0.373526	0.075137	0.149462	-0.189276	0.355052	-0.170361	0.240249	-0.333523	0.168086	0.00352839	-0.0979881	-0.0724806	0.119018	-0.265318	0.0650825	0.182736	-0.0414832	0.0356831	-0.177344	-0.347771	0.307858	0.213843	-0.10678	0.229862	0.390213	0.084522	0.379911	-0.159754	-0.123871	0.111346	-0.0293906
Dihydrouracil	-0.195706	-0.070957	0.0982877	-0.203058	0.184352	0.116126	0.498449	0.0675448	0.0542092	0.106245	-0.421819	-0.306863	0.294883	-0.334656	0.310144	-0.112103	0.25127	-0.327266	0.0736288	-0.403441	-0.30468	0.0318439	-0.16413	0.366975	-0.535817	0.240612	0.0443944	-0.00815875	0.253413	-0.0768152	-0.312865	0.168299	0.0309481	0.050178	-0.230143	-0.0066676	0.168709	-0.456274	-0.322116	-0.0705941	0.0588087	0.186483	-0.0940826	-0.434376	-0.471895	0.538767	-0.137498	-0.272386	0.39201
N8-Acetylspermidine	0.454036	-0.0466206	-0.317565	0.441897	0.287767	-0.561548	-0.42099	-0.1651	0.0233245	0.253022	0.514654	0.364352	0.216851	0.204593	0.202474	-0.225536	-0.0507364	0.307656	-0.230963	0.541804	-0.202056	-0.231185	-0.541287	-0.383356	0.316227	0.238504	-0.127449	0.165275	-0.354557	-0.0274741	0.356832	0.241159	-0.361026	-0.263629	-0.0979886	0.129162	-0.0465427	0.492489	-0.269413	-0.521221	-0.0817145	-0.0503456	-0.273776	0.511953	-0.0478625	-0.0697718	-0.377994	0.605498	-0.218003
PC (18:1/18:1)	-0.0511514	-0.208204	0.262342	0.218496	-0.224754	-0.040805	0.262133	-0.245285	-0.0776742	-0.198239	0.160694	0.157129	-0.212673	-0.0625515	-0.253759	-0.0984882	0.0469112	0.0896656	0.110887	0.146596	-0.304732	0.0172405	-0.355971	0.102249	0.0261754	0.177463	0.142336	0.226787	0.0746335	0.117991	0.146425	0.00963789	-0.100353	-0.266109	-0.26048	0.250948	-0.323808	0.128085	-0.527349	-0.365142	-0.0343532	-0.138619	-0.546338	0.141519	0.18305	0.169698	0.119094	0.0680467	-0.185807
N-Phenylacetylglycine	-0.202593	0.321685	-0.145863	-0.283964	0.463961	-0.178833	-0.083577	-0.136878	0.253895	0.324614	-0.261057	-0.06773	0.247298	0.0294794	0.106697	0.0119853	0.482981	-0.0113785	0.0133789	-0.244848	0.18658	0.194932	0.138274	0.0942487	-0.203226	0.228449	0.407901	0.314407	-0.0678285	0.271775	-0.0624783	-0.343336	0.26863	-0.0424645	0.157696	0.290871	0.178535	-0.115524	0.129744	-0.0379483	0.425276	0.0456671	0.145887	-0.263414	-0.0216257	-0.178543	-0.0567735	-0.266315	0.294714
PC (14:1e/3:0)	0.0844731	-0.13259	0.0458873	-0.172	0.156331	-0.0675428	-0.0644962	0.541168	0.35983	0.120521	-0.268753	-0.150705	0.0953999	-0.450051	0.142982	0.349541	-0.379783	-0.196438	-0.338661	-0.260713	-0.258641	-0.0616443	-0.123298	0.150823	-0.342077	-0.168214	-0.217264	-0.105656	0.49491	0.104397	-0.155657	-0.0513185	-0.1046	0.449676	-0.323641	-0.074175	-0.0589811	-0.398357	-0.14541	0.0423665	0.0729634	0.0139109	-0.107652	-0.284291	-0.262468	0.124101	-0.0711975	-0.204644	-0.225986
Cortisol	-0.188018	-0.273608	0.486959	-0.117798	-0.187684	0.201664	0.163049	-0.107902	0.22413	0.093729	-0.204594	-0.170665	0.206411	-0.196093	0.19172	-0.0706853	-0.150502	-0.146543	-0.0453062	-0.220964	0.136511	-0.337882	0.168978	0.167288	-0.24345	-0.41498	-0.207682	-0.00297369	0.350818	0.369579	-0.164599	-0.392628	0.150623	0.317529	0.0597694	0.0222612	-0.085651	-0.453396	0.175641	-0.0508168	0.550603	0.0357111	0.086282	-0.200593	-0.035192	0.00618265	-0.349757	-0.206334	0.0147151
PC (18:3/18:3)	0.305882	-0.137931	-0.124943	-0.128535	0.127108	0.00343088	-0.42376	0.414071	0.630226	0.149247	0.033128	0.112584	-0.162468	-0.0276774	-0.182475	0.345502	-0.188145	0.11521	-0.180626	0.0556143	-0.0634279	-0.0065005	-0.0595679	0.100201	0.0692029	-0.263555	-0.155902	-0.344191	0.266638	0.453643	0.117786	0.00642557	-0.289735	0.343138	-0.0510034	-0.382342	0.0778446	-0.190925	0.159636	0.0876296	0.303722	-0.0399573	0.185218	0.029091	0.0814273	-0.336497	0.0378451	0.0184476	-0.248682
3-[1-(phenylsulfonyl)-2-pyrrolidinyl]pyridine	0.0562862	0.0450457	-0.122988	0.345555	-0.103811	-0.120693	0.0457222	-0.161928	-0.415346	-0.117672	0.021807	-0.0277702	-0.208066	0.203168	-0.230904	-0.122508	0.334056	-0.0731265	0.0690899	0.0360107	0.0605516	0.0654319	0.108572	-0.127586	0.189702	-0.0733429	0.206226	0.629431	-0.218043	-0.269932	-0.0379674	-0.029698	0.210449	-0.289947	-0.165589	0.605508	-0.183334	-0.0656284	0.0132365	0.0472091	-0.173482	-0.142909	0.0725061	0.00515569	0.368277	-0.204331	0.172179	0.0826298	-0.175927
17alpha-Hydroxyprogesterone	-0.159546	-0.000602472	0.215039	-0.0403452	-0.292404	0.2099	-0.00195695	0.100555	-0.0947907	0.0512308	-0.27706	-0.105751	-0.0391534	-0.492872	-0.0188829	-0.100694	-0.0573215	-0.0875887	-0.411717	-0.276876	0.472476	-0.234234	0.620144	0.0394733	0.0480779	-0.518427	-0.34827	0.154667	0.0742085	0.00185681	-0.097733	-0.254114	0.551828	0.209475	0.133432	0.198047	0.038135	-0.372163	0.551982	0.472375	0.0795198	-0.190536	0.514324	-0.302639	0.460222	-0.147568	0.361213	-0.1294	-0.183954
Lysopc 18:3	0.579188	-0.409605	0.01684	0.383779	-0.42692	0.0885924	-0.224472	-0.138188	-0.189831	-0.184117	0.404299	0.135801	-0.256904	0.237873	-0.187518	-0.203908	-0.298492	0.0787941	0.0138605	0.411836	0.058424	-0.414421	0.13221	-0.432283	0.537922	-0.324782	-0.332418	-0.0810841	-0.413086	-0.0686589	0.131294	0.371642	-0.102294	-0.284819	-0.0786494	-0.114045	-0.110228	0.112127	0.343811	0.302099	-0.274466	-0.166008	0.364079	0.418069	0.340014	-0.30707	-0.0190519	0.537807	-0.372318
PC (16:0/17:0)	-0.416924	0.380817	-0.196459	-0.286758	0.530585	-0.279819	0.16183	0.365875	0.174582	0.188647	-0.246257	0.0143651	0.220046	-0.128963	0.11862	0.379064	0.490955	0.0919471	0.141846	-0.233057	0.0517872	0.233256	-0.200391	0.109627	-0.396315	0.13006	0.31719	0.205314	0.344052	-0.0529103	0.0229721	-0.0790708	-0.010321	0.338513	0.187918	0.194625	0.20926	-0.154797	-0.242172	-0.358848	0.28774	0.205633	-0.306614	-0.273642	-0.418999	0.32358	-0.150554	-0.436405	0.234743
PC (18:1/18:2)	-0.125756	-0.380468	0.480731	0.349833	-0.289759	0.283385	0.0992235	-0.27256	-0.0474691	-0.26637	-0.206112	-0.562798	-0.15262	-0.0683571	-0.0823818	-0.308119	-0.221642	-0.606051	-0.116242	-0.233463	0.0560767	-0.278241	0.0934001	0.13308	-0.170214	-0.0429203	-0.181709	0.0332604	0.0755927	0.314512	-0.566179	-0.181712	0.209705	-0.117189	0.00308976	0.0595937	-0.074176	-0.160267	-0.031915	-0.0491158	0.19182	-0.31188	-0.23054	-0.185763	0.0479109	-0.0820932	0.0793687	0.00980097	-0.0519483
Cystamine	-0.448211	0.181359	0.110984	-0.266569	0.11638	-0.00539646	0.31617	-0.0306801	0.318189	0.385841	-0.275798	-0.0517858	0.309428	-0.473751	0.192639	0.173991	0.520898	0.0367168	0.102111	-0.277052	0.310229	0.114207	0.15904	0.275178	-0.169827	-0.313539	0.150106	-0.167852	0.429743	0.44368	-0.0374649	-0.164646	0.294057	0.294572	0.248012	-0.163429	0.080954	-0.410235	0.157274	-0.0102826	0.74209	0.203868	-0.0220157	-0.286796	0.143519	0.272265	0.193689	-0.424571	0.178415
L-Homocitrulline	-0.0755219	0.25638	-0.102568	-0.0459683	0.362399	-0.246474	-0.142179	-0.195188	-0.183348	0.146182	-0.0880274	-0.113254	0.391588	-0.0924529	0.39476	-0.372079	0.0836371	-0.0377797	-0.253936	-0.0929478	0.497311	-0.359182	0.255808	-0.0491971	-0.113476	0.102312	-0.374155	0.118316	-0.0861403	-0.135781	-0.099652	-0.0629381	0.413102	0.102343	0.47285	0.121836	0.399917	0.19555	0.420114	0.0478159	0.180547	-0.0152249	0.250379	-0.0650999	-0.26383	-0.0186383	-0.371043	-0.0076867	0.202258
PE (18:1/20:5)	0.352495	-0.307121	0.103704	0.217902	-0.0647496	-0.0311647	-0.324584	-0.100386	0.209824	-0.0576577	0.25321	0.244533	-0.223874	-0.26138	-0.231234	-0.216388	-0.176117	0.245596	-0.337133	0.27298	0.277564	-0.599009	0.158693	-0.0463953	0.359559	-0.216908	-0.512957	-0.247636	-0.0112412	0.404778	0.254843	0.374979	0.131819	0.00834346	0.185462	-0.261226	0.246158	0.128367	0.41215	0.268129	0.145335	-0.220806	0.221625	0.24007	0.393854	-0.296036	0.0339244	0.35913	-0.331063
Avobenzone	0.389237	-0.535988	0.200168	0.636154	-0.402455	0.00164863	-0.0693765	-0.145543	-0.264938	-0.226938	0.308552	0.0112172	-0.222284	0.287013	-0.180898	-0.264359	-0.166116	-0.109225	-0.019973	0.325276	-0.221519	-0.471323	-0.217096	-0.482574	0.27198	-0.20771	-0.179264	0.459022	-0.428886	-0.120343	-0.00450661	0.261224	-0.19208	-0.486676	-0.294773	0.430745	-0.305512	-0.00514965	-0.177488	-0.204835	-0.265972	-0.321102	-0.108317	0.292068	0.153815	-0.0734183	-0.179584	0.520499	-0.389695
4-[1-(dimethylamino)ethylidene]-2-phenyl-1,3-oxazol-5(4H)-one	0.243159	-0.442969	0.372685	0.423575	-0.346316	-0.0638967	-0.0420851	-0.206477	-0.253635	-0.293108	0.217339	0.010533	-0.153289	0.127551	-0.134845	-0.218002	-0.429382	-0.122103	-0.151585	0.206058	-0.298201	-0.44622	-0.2247	-0.445444	0.0589166	0.0324465	-0.147635	0.554609	-0.3661	-0.09057	-0.00754186	0.0425095	-0.0481037	-0.552183	-0.334209	0.585475	-0.436434	0.194947	-0.334154	-0.212156	-0.333355	-0.413892	-0.355747	0.206621	0.0114312	0.0300229	-0.211398	0.344539	-0.408381
Dihomo-γ-linolenic acid ethyl ester	0.37535	-0.245276	0.0564463	0.317898	-0.319883	-0.0295103	-0.160676	-0.095347	0.134819	-0.0768735	-0.136256	-0.471394	-0.111491	0.141417	-0.132511	-0.0879172	-0.0607325	-0.495153	-0.0581401	-0.13507	0.18358	-0.207687	0.235665	-0.228364	0.00575193	-0.186529	-0.143259	0.216026	-0.256679	0.170559	-0.474422	-0.257701	0.145625	-0.25662	0.0846574	0.17838	-0.12572	-0.162962	0.400786	0.222243	0.156917	-0.33609	0.29239	-0.0937004	0.111457	-0.298251	-0.0225553	0.206919	-0.286243
3-Hydroxy-4-Methoxycinnamic Acid	0.169668	0.0712339	-0.129136	-0.0995398	0.00149745	-0.0317681	-0.0746541	0.0475261	0.230398	0.0473218	-0.131337	-0.0685668	0.00870439	-0.163892	0.0128081	-0.156467	-0.0683289	-0.0544377	-0.217786	-0.119071	-0.0567383	0.13534	-0.0107484	0.20156	-0.132272	0.427143	-0.0515576	-0.128854	-0.11688	-0.0373442	-0.0679428	-0.244213	-0.0642414	0.0567143	0.051052	-0.122473	0.198101	0.0934505	0.0367528	0.0146018	-0.191423	-0.0264985	0.205301	-0.12217	-0.069715	-0.0718338	0.0479307	0.15735	0.112992
PC (12:0/16:4)	-0.261485	-0.133677	0.273379	-0.00603469	-0.0689336	0.42194	-0.00652716	-0.0926256	0.00855524	-0.297617	-0.182727	-0.358765	-0.17142	0.670909	-0.14103	-0.0434649	-0.143933	-0.383777	0.215187	-0.195157	-0.312984	0.169081	-0.132523	0.164636	-0.35642	0.211543	0.250713	0.151811	-0.0893352	0.050425	-0.365772	-0.305427	-0.254402	-0.205637	-0.0730263	0.134846	-0.0919826	-0.0365001	-0.335544	-0.266619	-0.0272739	-0.118839	-0.206424	-0.166961	-0.378596	-0.107316	-0.26033	-0.167518	0.333687
N-P-Coumaroyl Spermidine	-0.585195	0.590751	-0.18498	-0.480839	0.11614	0.0930227	0.309236	0.240958	-0.184475	0.238196	-0.41037	-0.0600968	0.28936	-0.239375	0.258524	0.194933	0.487399	0.0896891	0.138086	-0.409868	0.52558	0.376067	0.53653	0.137357	-0.190758	-0.176983	0.271888	0.0532384	0.142004	-0.403465	-0.0428351	-0.409734	0.394781	0.523128	0.412089	0.0761689	0.291456	-0.346247	0.433726	0.240364	0.06516	0.388862	0.490242	-0.426653	-0.00924832	0.142544	0.147852	-0.490035	0.448679
PC (22:6e/17:2)	0.367793	-0.625859	0.390643	0.0675683	-0.274368	0.224657	0.0572482	-0.144329	0.312839	-0.101763	0.030425	-0.173056	-0.0540506	0.248295	-0.0345319	-0.0562968	-0.407104	-0.300611	0.120225	0.0220996	-0.623377	-0.18781	-0.364295	0.108937	-0.187593	-0.0975938	-0.13466	-0.0397859	0.121571	0.398851	-0.191509	0.0202087	-0.382959	-0.273783	-0.547087	-0.0616078	-0.427166	-0.268286	-0.373167	-0.142908	0.212123	-0.151797	-0.194696	0.056737	-0.212981	0.0183994	-0.339396	0.0672127	-0.180935
N-Phenylacetylglutamine	0.293204	-0.243456	0.151702	-0.251157	-0.152917	0.304399	-0.0451674	-0.232075	0.0169381	-0.101151	0.0326073	0.0798274	-0.114499	0.14821	-0.114843	-0.223913	-0.138711	0.0714391	0.121938	0.0349725	0.0680258	-0.23792	0.370053	-0.0461334	0.158986	-0.043547	-0.0687543	-0.0708147	-0.265353	0.128764	0.0799362	0.0997941	0.148453	-0.182539	-0.0582156	-0.08683	0.0944269	-0.114314	0.41533	0.502757	-0.0497326	-0.0234226	0.605922	0.046081	0.156127	-0.340006	-0.0927166	0.0682108	0.0762219
PE (19:1/19:2)	-0.66813	0.659545	-0.32862	-0.395347	0.593948	-0.07928	0.0255197	0.265242	0.180674	0.466346	-0.285069	-0.011212	0.477301	-0.177383	0.442192	0.370724	0.390534	0.122395	-0.0209916	-0.270157	0.206735	0.471445	0.049764	0.276947	-0.277729	0.0237747	0.315867	-0.386162	0.347747	-0.0113028	0.00599344	-0.0820864	0.0453924	0.491833	0.359274	-0.380171	0.363977	-0.0632949	0.0236325	-0.0796063	0.295697	0.477434	-0.0982483	-0.29942	-0.279825	0.319675	0.0387864	-0.458895	0.562828
Obscurolide A1	-0.0621261	-0.0866373	0.0293855	-0.420082	0.382513	-0.020038	0.432792	0.0418097	0.102945	0.20688	-0.145754	0.0331002	0.213077	-0.13358	0.15495	0.0690658	0.47318	-0.000706579	0.442427	-0.150162	-0.282095	0.145415	-0.265724	0.17274	-0.239258	0.0664245	0.311438	0.178994	0.313724	0.181077	0.0251179	0.19899	-0.011874	0.0729345	-0.385538	0.155982	-0.0371774	-0.507587	-0.392594	-0.225212	0.435281	0.208189	-0.124496	-0.158168	-0.265323	0.249086	-0.0280865	-0.447905	0.197072
20-Dihydro 6α-methylprednisone	-0.107077	0.089858	-0.0875768	0.45531	-0.0998799	-0.0615795	-0.0221653	-0.198056	-0.428498	-0.182071	0.0462247	-0.0794206	-0.214172	0.365112	-0.214619	-0.11215	0.230228	-0.110199	0.038244	0.0598814	0.0130369	0.107067	0.0210405	-0.0953987	0.136042	0.0159712	0.251539	0.521655	-0.236896	-0.284129	-0.0878373	-0.0721803	0.0852023	-0.298346	-0.064132	0.503133	-0.15434	0.103501	-0.0992054	-0.0934332	-0.248465	-0.117302	-0.127619	0.0311233	0.263806	-0.165642	0.0711328	0.131376	-0.05436
D-Galactosamine	-0.282872	-0.0350772	0.212012	-0.321958	-0.0121332	0.566977	-0.223176	0.306526	0.200488	-0.211019	-0.224499	-0.138495	-0.231352	0.377616	-0.167276	0.1786	-0.375968	-0.1289	-0.0719495	-0.229107	-0.151382	0.138795	0.118263	0.267174	-0.282616	-0.0781167	-0.0436843	-0.203931	0.128328	0.0880128	-0.134787	-0.209043	-0.20946	0.18426	0.0167592	-0.20081	0.0968219	-0.125433	-0.0346486	0.0838935	-0.0587311	-0.0794499	0.127606	-0.230839	-0.264154	-0.193066	-0.0490522	-0.2964	0.255086
PC (20:1/22:6)	-0.176665	0.145662	-0.0991276	0.332352	-0.115	-0.171512	0.267783	-0.0949513	-0.425665	-0.0231562	0.121984	-0.0278956	0.107078	-0.0974042	0.185583	0.0438762	-0.0149427	-0.055036	0.0560581	0.103542	-0.155538	0.231869	-0.241536	0.0725181	0.0709738	-0.0361838	0.0343445	-0.0957342	0.220377	-0.351927	-0.0358091	0.129895	-0.0694934	0.0334769	-0.161011	-0.0623892	-0.275582	0.170893	-0.34831	-0.187144	-0.218798	0.191545	-0.501005	0.128032	0.0424063	0.382241	0.12428	0.0302693	-0.0778846
Prostaglandin I2	0.345969	-0.449866	0.288343	0.357369	-0.605818	0.312955	-0.00914181	-0.321781	-0.434901	-0.449533	0.292927	0.030477	-0.317083	0.257952	-0.199715	-0.37222	-0.494396	-0.0215374	0.0302917	0.282945	0.0228692	-0.475183	0.245529	-0.230485	0.361741	-0.19245	-0.361293	-0.0607081	-0.344026	-0.234821	0.0250917	0.240735	0.0128196	-0.277577	-0.0680345	-0.0516442	-0.116159	0.161643	0.282249	0.364525	-0.486899	-0.135119	0.288333	0.308335	0.253122	-0.220746	-0.162609	0.449315	-0.202478
1-Naphthol	-0.456804	0.358285	0.0476561	0.198434	-0.221209	0.147673	-0.116843	-0.181883	-0.328618	-0.167845	-0.129514	-0.154434	-0.161635	0.0656793	-0.136027	-0.155266	0.0187726	-0.0777163	-0.262496	-0.147406	0.514427	0.125839	0.458908	0.194618	0.0668006	-0.122146	-0.104967	0.0744297	-0.0188347	-0.166115	-0.141976	-0.445733	0.395115	0.0802055	0.471218	0.109255	0.078558	0.251375	0.359396	0.158853	-0.0764694	-0.147633	0.107452	-0.125947	0.368503	-0.213095	0.289861	-0.0699404	0.0681875
PC (19:0/19:1)	0.172243	-0.118081	-0.0504928	0.215471	-0.330005	0.0722778	-0.134328	-0.0520014	0.105284	0.0504103	0.331363	0.155668	-0.202345	0.460569	-0.216601	0.0436813	0.064764	0.105023	0.230807	0.316397	-0.228201	0.365801	-0.336756	-0.146235	0.330483	-0.128724	0.19217	0.0367574	-0.219404	0.142528	0.146988	-0.243405	-0.46149	-0.217174	-0.169682	-0.000533146	-0.424309	0.100258	-0.304118	-0.456274	0.105141	-0.138487	-0.136809	0.343159	0.286848	-0.203989	0.283276	0.212315	-0.205862
Acetyl-β-methylcholine	0.273431	-0.160851	-0.0752849	0.10331	0.119353	-0.304253	-0.198756	0.0344192	0.471153	0.270187	0.391106	0.465287	0.138464	-0.263813	0.123107	0.154811	-0.287573	0.462744	-0.164553	0.413568	-0.286292	-0.10482	-0.457696	-0.0102639	0.223838	0.106974	0.013556	-0.50099	0.182822	0.341396	0.466062	0.142254	-0.480102	0.289825	-0.14156	-0.488452	-0.0123938	0.208698	-0.237928	-0.310962	0.0563895	0.29121	-0.328606	0.373761	0.0957299	0.0171458	-0.264968	0.40085	-0.164984
Acetyl-L-carnitine	-0.264307	0.16822	0.0134504	-0.174874	-0.0759215	0.0108231	-0.216712	0.623089	0.407907	0.210903	-0.0879785	0.180611	0.0276387	-0.173802	-0.0231071	0.437493	-0.0737944	0.220851	-0.308505	-0.0807968	0.0802763	0.130379	-0.0844728	-0.0690695	-0.140448	-0.388286	-0.161943	0.0108675	0.180565	0.0546889	0.191233	-0.374102	-0.222004	0.360221	0.206303	0.0256561	-0.0755202	-0.115928	-0.05446	-0.302204	0.176411	-0.127964	-0.0450039	-0.126019	-0.0543578	0.147437	0.14347	-0.158702	-0.175461
PC (14:0e/18:0)	-0.184075	0.332268	-0.271816	-0.131345	0.235728	-0.353427	0.333911	0.148078	0.121462	0.156723	-0.163086	0.00327423	0.0749013	-0.30047	-0.0476079	0.334371	0.597373	0.0536021	0.278043	-0.153828	0.00797799	0.436793	-0.155805	0.0411858	-0.146282	0.304163	0.568052	0.146951	0.134143	-0.0412322	0.00435608	-0.0701268	0.0555915	0.08052	0.0410705	0.144406	0.0322683	-0.080144	-0.221494	-0.172409	0.0869966	0.202584	-0.284841	-0.177646	-0.0168423	0.283918	0.254338	-0.220539	0.081954
XLR11 N-(2-fluoropentyl) isomer	0.048022	-0.159091	0.2503	0.115105	-0.263335	0.0562094	-0.0216183	-0.408892	-0.0618714	-0.178191	0.273913	0.336632	-0.0510647	0.133822	-0.110884	-0.230823	-0.0908756	0.411164	0.0436253	0.28715	0.320749	-0.580898	0.262501	-0.0846903	0.226433	-0.188623	-0.258924	-0.117697	-0.137331	0.0846813	0.35137	0.153387	0.114034	-0.0857376	0.417243	-0.126668	0.171496	0.261658	0.469092	0.232041	0.025161	0.0725556	0.239835	0.27187	0.182276	-0.0823158	-0.527826	0.289653	0.0163137
Stearamide	-0.0641915	0.442426	-0.391855	-0.107708	0.187247	-0.234219	0.00579617	0.292834	0.220399	-0.0531442	-0.497949	-0.50393	-0.141829	-0.141621	-0.23679	0.307616	0.490193	-0.376671	0.0790005	-0.484203	0.500009	0.343356	0.407678	0.114803	-0.277863	0.264206	0.318207	0.098796	0.0452353	-0.06643	-0.489922	-0.384579	0.348051	0.241632	0.510381	0.0679177	0.398439	-0.12386	0.503238	0.3329	0.0809803	-0.0180855	0.296948	-0.471517	-0.0600019	-0.185305	0.246321	-0.237063	0.0987229
4-(2,3-dihydro-1,4-benzodioxin-6-yl)butanoic acid	-0.192509	0.00355823	0.115964	-0.40105	0.195459	0.164733	-0.0253809	0.457352	0.269906	0.186361	-0.341616	-0.124113	0.238728	-0.285017	0.284181	0.175527	-0.213013	-0.0969948	-0.23987	-0.33755	0.0157664	-0.0845397	0.112507	0.181888	-0.383848	-0.23235	-0.2237	-0.107586	0.377707	0.0327565	-0.117848	-0.220377	0.00675561	0.563508	-0.0142375	-0.0821444	0.173717	-0.460873	0.084612	0.0250508	0.200079	0.116626	0.214042	-0.358933	-0.349747	0.0773763	-0.203566	-0.336939	0.13863
2-(1H-indol-3-yl)acetic acid	-0.38405	-0.118036	0.533313	0.135545	-0.376899	0.260823	0.157465	-0.193998	-0.25614	-0.396255	-0.311845	-0.328425	-0.211732	0.0157444	-0.226652	-0.114423	-0.200938	-0.340264	-0.136681	-0.329784	0.139948	-0.233961	0.353282	-0.00319394	-0.286905	-0.0512393	0.0438371	0.539223	-0.0779746	-0.0611357	-0.330523	-0.448978	0.40918	-0.20776	0.0786069	0.597057	-0.175279	-0.0837697	0.0645398	0.132174	-0.144241	-0.310851	-0.0993803	-0.325765	0.0835469	-0.0460602	-0.0753354	-0.158569	-0.0300961
5-methoxy-8,8-dimethyl-2-phenyl-4H,8H-pyrano[2,3-h]chromen-4-one	-0.484634	0.589005	-0.22621	0.185121	0.150745	-0.113904	-0.0165424	-0.226233	-0.333036	-0.114799	-0.22529	-0.175829	-0.0518235	-0.0235588	-0.0737538	-0.162246	0.361233	-0.0681191	-0.222188	-0.218553	0.49386	0.206932	0.351628	0.383444	-0.0887424	0.227193	0.0119992	0.0625113	0.0669615	-0.255994	-0.161317	-0.176784	0.46802	0.0331024	0.553581	0.0725636	0.344065	0.365025	0.293707	0.187049	-0.099786	-0.00370931	-0.011355	-0.222307	0.172009	-0.0118478	0.193952	-0.120579	0.263894
SM (d14:0/27:0)	-0.00251689	0.254197	-0.26554	-0.0988618	0.358502	-0.293458	-0.323661	0.137578	0.320687	0.403893	-0.0201783	0.0853997	0.142004	0.149715	0.0234081	0.147918	0.389299	0.0851373	-0.0855805	-0.0117042	0.0633509	0.289884	-0.157358	-0.109598	0.00619994	-0.0405543	0.223205	0.405798	-0.0772633	0.263819	0.0852466	-0.373775	-0.0393318	-0.0341367	0.0130728	0.364826	-0.10316	-0.0629938	-0.0870475	-0.380158	0.477561	-0.164358	0.00283703	-0.0270677	0.0752278	-0.238306	0.153493	-0.13482	-0.0895981
Arachidonic acid methyl ester	-0.281064	-0.312889	0.510879	-0.282298	-0.322175	0.494736	0.730409	-0.191674	-0.201869	-0.257119	-0.216766	-0.0957921	-0.016286	-0.2375	-0.0317141	-0.194158	0.257794	-0.0602679	0.471663	-0.224903	0.116903	-0.343755	0.297446	0.0902314	-0.19452	-0.132195	0.00147153	-0.063467	0.0476213	-0.0174606	-0.089539	0.33406	0.292567	-0.0866244	0.0968134	-0.0512221	0.177142	-0.438861	0.132466	0.295603	0.0558039	0.136125	0.205535	-0.232249	-0.121853	0.432683	-0.078381	-0.26505	0.342042
L-Threonine	-0.119735	-0.109017	0.258216	-0.410648	-0.113233	0.388459	0.319035	0.12817	-0.133962	-0.289359	-0.385686	-0.348042	-0.21564	-0.321644	-0.172168	-0.0274716	0.0417619	-0.28695	0.238749	-0.415292	0.457545	-0.14601	0.657012	0.0397558	-0.120526	-0.0792702	0.0277893	-0.02099	0.0982365	-0.0133745	-0.338242	-0.0927632	0.530484	0.32809	0.182446	0.0121393	0.316335	-0.473502	0.520716	0.566472	0.0183993	-0.00244072	0.527391	-0.378733	0.0391995	-0.210762	0.26019	-0.382063	0.137828
4-Hydroxybenzaldehyde	0.333123	-0.313588	0.219137	-0.103394	-0.298647	0.0602727	0.0347901	-0.0525664	0.240293	-0.121018	-0.0545513	0.0507289	-0.259288	-0.117031	-0.324352	-0.143953	0.00126532	0.0576354	0.0481385	-0.0522361	0.151479	-0.225007	0.244098	0.00987258	0.0583367	-0.02416	0.00742947	0.294586	-0.0619212	0.214875	0.0516256	-0.438584	0.122382	0.142537	-0.0245456	0.291714	1.14264e-05	-0.311659	0.314329	0.113778	0.126823	-0.133463	0.468026	-0.0591343	0.310873	-0.463541	-0.0826113	0.10768	-0.215319
Taurochenodesoxycholic Acid	0.0289272	-0.568666	0.675754	-0.183651	-0.266462	0.394167	0.0218684	-0.0848126	0.494384	-0.165425	-0.144624	-0.0924696	-0.212968	-0.237589	-0.250397	-0.0217592	-0.387506	-0.13521	-0.112153	-0.160601	-0.0982286	-0.441147	0.107218	0.21772	-0.188755	-0.250162	-0.250179	-0.138733	0.293749	0.752681	-0.0912732	-0.10219	0.0895239	0.00275103	-0.133245	-0.112774	-0.116649	-0.33981	0.0460883	0.154262	0.455865	-0.281003	-0.0226326	-0.149778	0.0984437	-0.134743	-0.0549235	-0.160943	-0.185634
PC (20:2/20:2)	-0.0113876	-0.16274	0.200109	0.217569	-0.382685	-0.0437974	0.25808	-0.135994	-0.121948	-0.208023	0.100545	-0.0724788	-0.201445	0.152313	-0.245506	0.0666388	0.0969411	-0.0912115	0.368944	0.0722653	-0.0490366	0.1148	-0.132384	-0.250945	0.0764836	0.0331733	0.379755	0.361967	-0.137824	-0.0208785	-0.0799969	-0.349226	-0.0818115	-0.146217	-0.0720938	0.374927	-0.373271	-0.0174991	-0.235495	-0.332979	-0.0187924	-0.0857708	-0.299912	0.106585	0.157793	-0.036595	0.0622961	0.067116	-0.193986
PC (18:0/18:0)	-0.437641	0.352364	-0.163352	-0.166303	0.39303	-0.142858	0.0289088	0.115169	0.173999	0.421469	-0.0341364	0.147577	0.400187	-0.00740583	0.335582	0.132169	0.396315	0.199858	0.0224732	-0.0233073	-0.0374646	0.308025	-0.312942	0.0516102	-0.168074	0.0881338	0.257874	-0.0116576	0.0784267	0.0503433	0.153939	-0.116154	-0.181364	0.137491	0.151154	-0.0199981	0.0911521	0.017705	-0.336062	-0.54634	0.308307	0.212318	-0.297078	-0.0576782	-0.245168	0.327795	-0.0395014	-0.191174	0.3452
α-Methylhistamine	-0.162172	0.536778	-0.444353	0.0852821	0.421591	-0.317875	-0.512455	0.0976684	0.185457	0.270716	0.0911408	0.104879	0.111028	-0.0457657	0.0810985	0.0226837	0.195666	0.214201	-0.387496	0.100419	0.490433	0.154904	0.0475942	0.0697115	0.160208	0.0969842	-0.182424	-0.300213	0.00363685	0.11721	0.125676	-0.0811881	0.0727106	0.230157	0.625739	-0.317784	0.410441	0.494606	0.287193	-0.13002	0.221183	-0.0453999	-0.00610768	0.0988932	0.0930167	-0.167402	0.217436	0.0864233	0.0663426
Asp-Phe methyl ester	-0.0985111	0.468806	-0.51274	-0.156385	0.424461	-0.322752	-0.363683	0.732852	0.383254	0.392044	-0.191039	-0.0534248	0.146464	-0.238936	0.148478	0.611343	0.0654917	0.011287	-0.299402	-0.177017	0.166863	0.435165	-0.0288606	0.0907454	-0.100581	-0.253315	0.00671375	-0.2095	0.449708	-0.00778998	-0.0437453	-0.264403	-0.127178	0.699861	0.135946	-0.217719	0.118513	-0.166416	0.113506	-0.0708909	0.237705	0.148164	0.0140757	-0.197586	-0.077837	-0.0790935	0.239123	-0.257147	-0.143587
PC (18:5e/19:2)	0.0994754	-0.433372	0.379026	0.0295631	-0.156286	0.371262	-0.00272997	-0.0181463	0.123415	-0.343054	-0.174833	-0.282068	-0.344009	-0.157328	-0.299523	-0.123501	-0.235053	-0.302024	-0.0927194	-0.177433	0.126606	-0.475994	0.300994	0.202349	-0.0775487	-0.218216	-0.388565	-0.205095	0.214692	0.381428	-0.277511	0.289619	0.247	0.0108311	0.0312809	-0.208787	0.193214	-0.262519	0.30098	0.452148	0.163052	-0.259238	0.170903	-0.170588	0.0721638	-0.17566	0.0662456	-0.081918	-0.120273
PC (14:1e/22:4)	0.0266873	-0.49246	0.512883	0.255011	-0.430049	0.229139	0.269231	-0.405014	-0.11363	-0.36201	0.0765123	-0.11064	-0.342816	0.210703	-0.38237	-0.165541	0.0503618	-0.15518	0.358233	0.0538207	-0.00773356	-0.304607	0.0504231	-0.00974362	0.0866369	-0.245308	0.0864862	0.31215	0.0502343	0.328418	-0.116536	-0.0619802	0.114049	-0.249226	-0.128579	0.302987	-0.303284	-0.221965	-0.0407436	-0.0484477	0.279558	-0.199745	-0.152357	0.0812364	0.29021	-0.18206	-0.0833553	-0.00845682	-0.209813
4-decyl-3-hydroxy-5-oxooxolane-2,3-dicarboxylic acid	-0.102557	0.0694849	-0.0619223	0.383189	-0.166997	-0.00274023	0.066866	-0.199183	-0.465239	-0.20035	0.061316	-0.0204569	-0.260228	0.326825	-0.259432	-0.125976	0.275411	-0.0540718	0.117432	0.068854	0.0119432	0.155551	0.0453569	-0.0638999	0.182079	-0.0123368	0.270938	0.521817	-0.215056	-0.301133	-0.0294673	-0.0758847	0.0995577	-0.27418	-0.111433	0.506946	-0.187317	0.0446717	-0.108048	-0.0737892	-0.251164	-0.100849	-0.0693867	0.0434349	0.339185	-0.168671	0.171407	0.0884794	-0.0644798
PC (14:0e/22:4)	-0.105446	0.101189	-0.092673	-0.235629	0.591431	-0.0893621	0.206239	-0.10078	0.0147706	-0.150342	-0.301935	-0.247006	-0.078273	-0.150545	-0.0940434	-0.0457676	0.265427	-0.241361	0.178	-0.297465	-0.140991	0.163751	-0.0481448	0.376127	-0.332872	0.729335	0.452725	0.0593357	0.210993	0.11292	-0.251158	0.167365	0.220627	0.0523812	-0.151713	0.0650078	0.363223	-0.0638149	-0.23509	0.0867393	-0.029867	0.142497	-0.226782	-0.302806	-0.253023	-0.0655441	0.0114135	-0.299999	0.351933
Fisetin	-0.404368	0.138179	0.280318	-0.308212	0.115809	0.0737818	0.0941721	0.07049	0.223046	0.00485012	-0.471023	-0.185327	0.169121	-0.457543	0.125402	0.000335964	-0.0775926	-0.093729	-0.352689	-0.468514	0.331713	-0.270606	0.375032	0.452291	-0.505107	-0.0821113	-0.30061	-0.036839	0.476147	0.159447	-0.168635	-0.342939	0.42852	0.435953	0.361293	0.00846156	0.311865	-0.220654	0.343152	0.242202	0.30643	0.0230718	0.143285	-0.481154	-0.186583	0.119444	-0.285546	-0.380576	0.179121
Thiamine	0.294168	-0.52422	0.393607	-0.125017	-0.116922	0.0951348	-0.000913961	-0.0978742	0.23772	0.0986208	0.282404	0.361829	0.162459	-0.202173	0.18623	-0.15751	-0.491969	0.282573	-0.110469	0.277757	-0.352865	-0.499945	-0.271807	-0.105344	0.0745302	-0.146664	-0.347719	-0.201183	0.0605682	0.316392	0.355476	0.243323	-0.250775	-0.0191461	-0.350428	-0.174288	-0.177043	-0.0734542	-0.208997	-0.135479	0.110737	0.0118633	-0.0709912	0.268499	-0.0800344	0.119097	-0.370895	0.199043	-0.16867
N-Acetyl-DL-tryptophan	-0.0250364	-0.0204234	0.163228	-0.301522	0.36689	-0.170945	0.0525237	-0.0652252	0.441142	0.140337	-0.44061	-0.394563	0.276938	-0.328418	0.200368	-0.0734334	0.0220042	-0.374527	-0.156178	-0.449385	0.0368293	-0.142554	0.0238228	0.297507	-0.563336	0.322112	-0.0288199	0.123931	0.29449	0.426463	-0.392005	-0.377465	0.27718	0.149211	0.0575149	0.138264	0.172094	-0.236586	0.0359928	-0.0402162	0.510633	-0.0815195	-0.0505849	-0.414701	-0.392902	0.000845575	-0.30497	-0.308927	0.131624
Cyclopentyl fentanyl-d5	-0.0948226	-0.235833	0.546547	-0.166362	-0.348235	0.24869	-0.0711074	-0.15485	0.200125	-0.175162	-0.0190973	0.165398	-0.143409	-0.237291	-0.23977	-0.259912	-0.179206	0.210122	-0.242262	-0.0261969	0.410805	-0.598556	0.388804	-0.235675	-0.000631968	-0.0529415	-0.294699	0.171447	-0.357113	0.308529	0.180557	-0.21756	0.338449	-0.213361	0.450254	0.211227	0.167108	0.114047	0.398844	0.149465	0.0769725	-0.399093	0.292938	-0.0432804	0.170539	-0.10042	-0.0522654	0.107946	-0.0599838
Cannabidivarin	0.216616	-0.371778	0.21272	-0.0593585	-0.203207	0.426938	0.0705665	-0.0704761	-0.194768	-0.398727	-0.0640219	-0.104663	-0.374156	0.136282	-0.278547	-0.190468	-0.251939	-0.120909	0.16312	-0.0572219	0.0106338	-0.265155	0.391244	0.0605702	0.0983352	0.00324552	0.0218589	-0.024227	-0.0850369	-0.0885439	-0.107973	0.121962	0.111811	0.108421	-0.178087	-0.0237933	0.191165	-0.293178	0.316102	0.503223	-0.339764	0.0651412	0.499957	-0.0686516	0.146151	-0.44623	-0.121447	0.0724091	0.0822071
1-(4-Methoxyphenyl)-2-propanone	0.313506	-0.2012	0.0745222	-0.0916707	-0.234226	0.189289	-0.110569	0.0526679	0.0864644	-0.201664	-0.0784896	-0.0918137	-0.284818	-0.0431644	-0.278961	0.0415164	-0.191416	-0.0794847	-0.00644789	-0.0736809	0.237078	-0.245363	0.47971	-0.0569301	0.135177	-0.23464	-0.170756	-0.107793	-0.0572119	0.108119	-0.0873647	0.0588003	0.224907	0.0340142	0.0631195	-0.119422	0.104725	-0.183108	0.581884	0.648149	-0.0593035	-0.108892	0.554645	-0.0646286	0.239877	-0.367324	0.0674322	0.0395379	-0.189989
Asp-Phe	0.080118	0.0480046	-0.123855	0.311442	-0.0568567	-0.269896	-0.211038	0.0732607	-0.154818	0.0952982	0.184465	0.136458	0.0280111	0.291847	-0.0505458	0.0398748	0.28685	0.144604	-0.00164073	0.202268	0.294254	-0.235076	0.0323904	-0.54547	0.222476	-0.413333	-0.0610479	0.601757	-0.333971	-0.168343	0.139343	-0.0571686	0.0403365	-0.190155	0.213902	0.554439	-0.124014	0.0146027	0.197953	-0.209973	0.126714	-0.208064	0.12083	0.167929	0.121949	-0.102144	-0.162523	0.177432	-0.277927
2-(3,4-dimethoxyphenyl)ethanamine	-0.00732002	-0.280144	0.254145	-0.00473636	-0.0125092	0.359184	0.0758171	-0.128475	-0.344562	-0.528867	0.0983004	0.0845908	-0.33559	0.353464	-0.254631	-0.325535	-0.246727	0.0391778	0.133694	0.103199	-0.274668	-0.279742	-0.0753519	-0.0147161	-0.0636327	0.454269	0.0161448	0.139477	-0.299375	-0.276762	0.0780491	0.364904	-0.121152	-0.277732	-0.132036	0.147934	0.218187	0.206081	-0.271494	-0.00740882	-0.599161	-0.0819832	-0.0563754	0.0743539	-0.272896	-0.0470897	-0.27718	0.133728	0.266827
(5-L-Glutamyl)-L-Amino Acid	0.0184617	-0.160763	0.197526	0.00658264	-0.0106967	0.105774	-0.420486	0.0991463	0.467902	0.111361	0.0636147	0.0233623	-0.0206597	-0.25889	0.00213265	0.0541894	-0.432989	0.0604479	-0.411629	0.0588281	0.253494	-0.313103	0.142547	0.00779758	0.118112	-0.258399	-0.358838	-0.505608	0.157414	0.560994	0.0376761	-0.0950985	-0.00269308	0.318499	0.27031	-0.481573	0.16891	0.0571152	0.316879	0.0818684	0.327755	-0.117914	0.050794	0.0649067	0.173255	-0.269246	0.0412362	0.121551	-0.156545
ethyl 3-oxo-3-(1H-pyrazol-5-ylamino)propanoate	-0.162998	-0.390189	0.634519	-0.299369	-0.348353	0.536118	0.460636	-0.283974	-0.108853	-0.36323	-0.216312	-0.123811	-0.0924551	-0.183056	-0.0610697	-0.308292	-0.221016	-0.0993523	0.191259	-0.236762	0.0904567	-0.453577	0.390118	0.251549	-0.233536	-0.028215	-0.175623	-0.125099	0.127799	0.0917839	-0.118482	0.00947286	0.300313	0.0685559	0.055926	-0.0816391	0.159488	-0.302169	0.237207	0.377698	-0.00733942	0.0609718	0.281179	-0.215923	-0.08821	0.0786802	-0.283593	-0.185413	0.260871
N-Acetylserotonin	-0.546776	0.196016	0.288689	-0.228924	-0.229189	0.487854	0.194522	-0.114475	-0.310907	-0.415358	-0.420216	-0.27897	-0.273735	0.259302	-0.300368	-0.033116	0.129962	-0.191049	0.149592	-0.429463	0.403165	0.0319656	0.682539	0.201571	-0.264196	-0.062661	0.175262	0.290209	-0.0699782	-0.213457	-0.267864	-0.360476	0.487033	-0.036098	0.38694	0.307823	0.184588	-0.132281	0.432199	0.472073	-0.140031	-0.0751731	0.378113	-0.425692	0.046128	-0.156819	0.00838882	-0.405661	0.357546
ACar 14:3	0.423133	-0.0451884	-0.266441	0.294935	-0.254964	-0.111504	-0.290143	-0.0296364	-0.282349	-0.0132485	0.461846	0.382103	-0.242327	0.472525	-0.227091	0.00910845	-0.0483761	0.310999	0.0929089	0.472308	-0.126349	0.148356	-0.0698919	-0.474837	0.589364	-0.1637	0.174498	0.338834	-0.504921	-0.303863	0.36891	0.00827002	-0.259315	-0.297354	-0.289857	0.307624	-0.365542	0.19826	-0.00975976	-0.0397364	-0.403636	-0.0786936	0.211126	0.452219	0.463553	-0.407455	0.150056	0.422588	-0.352945
Sn-Glycero-3-Phosphocholine	-0.0149197	0.113879	-0.120236	-0.329887	0.256665	0.012413	0.278634	-0.260743	0.0246213	-0.025683	-0.0298229	0.054296	0.0954015	0.177906	0.0670901	-0.0633771	0.184566	0.0937174	0.454585	-0.025141	-0.267825	0.329146	-0.12832	0.190925	-0.140571	0.730427	0.626096	-0.15631	-0.120681	-0.0793307	0.0505007	-0.0253993	-0.158175	-0.0184638	-0.100983	-0.159161	0.206028	0.099362	-0.215556	-0.0411487	-0.220162	0.434166	-0.0166311	-0.016309	-0.257131	0.00229872	-0.265979	-0.0340266	0.537617
PC (18:2e/21:0)	-0.316417	0.395622	-0.239552	0.125469	0.370404	-0.35118	-0.238188	0.155784	0.170551	0.216301	-0.048536	-0.0428159	0.187009	0.191266	0.116439	0.226832	0.2244	-0.00202733	-0.149749	-0.0418898	0.0122675	0.286328	-0.325093	0.0316671	-0.215935	0.118058	0.170483	0.209802	0.118313	0.0270782	-0.0384242	-0.329866	-0.165509	0.0934862	0.227896	0.194327	-0.0158678	0.226837	-0.290059	-0.564046	0.255958	-0.0304264	-0.464612	-0.0524387	-0.241172	0.095517	-0.123228	-0.112537	0.0598606
4'-Methoxy-α-ethylaminovalerophenone	-0.412312	0.0129167	0.424881	-0.257414	-0.267451	0.302403	0.0649915	0.00174813	0.184897	-0.194793	-0.185896	0.207764	-0.248003	-0.157132	-0.337872	0.0536145	-0.0188465	0.304317	-0.127558	-0.183931	0.359768	-0.205112	0.430051	0.353751	-0.139149	-0.284403	-0.103407	0.0822829	0.307692	0.219289	0.22586	-0.457543	0.269792	0.353924	0.368684	0.117092	0.131466	-0.160244	0.356055	0.180695	0.219584	-0.0386056	0.245665	-0.223722	0.290334	-0.175077	-0.112745	-0.25612	0.0354299
1-Naphthylacetic Acid	-0.0124389	-0.0330185	-0.000218628	0.419018	-0.159733	-0.0576747	0.00777618	-0.188004	-0.41623	-0.180121	0.0792879	-0.00298037	-0.218445	0.361336	-0.235859	-0.18641	0.253556	-0.0530987	0.0514679	0.0909754	0.00631071	-0.033811	-0.00553291	-0.136327	0.138657	-0.102591	0.116797	0.687473	-0.232672	-0.25962	-0.0126839	-0.0860879	0.0899247	-0.319509	-0.120283	0.661148	-0.217379	-0.00423634	-0.101986	-0.16173	-0.142934	-0.207167	-0.0427966	0.0592345	0.261182	-0.173485	-0.00201377	0.12376	-0.156429
2-Hydroxyphenylalanine	0.256725	-0.505223	0.415425	0.0118116	-0.111721	0.138414	-0.0122918	-0.249573	0.276174	-0.101028	-0.0300437	-0.169934	-0.0961709	-0.0457803	-0.141957	-0.321556	-0.0251217	-0.189453	0.0372058	-0.0411483	0.162521	-0.563387	0.109761	-0.0326415	-0.0354492	-0.124004	-0.287415	0.114926	-0.0213296	0.564184	-0.166656	-0.024544	0.181627	-0.122679	0.075512	0.091498	0.0761744	-0.249989	0.232414	0.0137468	0.516822	-0.310458	0.183414	-0.0130689	0.028172	-0.254977	-0.19124	0.0466963	-0.137649
5β-Androstan-17β-ol-3-one	-0.366244	0.137196	0.0763498	-0.349165	-0.157375	0.485536	0.230489	0.0454691	0.129386	0.059657	-0.318339	-0.331885	0.0465812	0.0263669	0.0595402	0.250859	0.0888145	-0.27709	0.301459	-0.332091	0.0448827	0.450602	0.315447	0.125032	-0.138888	-0.0607046	0.388785	-0.482078	-0.0243785	0.126142	-0.326775	-0.105764	0.0522382	0.00316063	0.104234	-0.474291	0.0397889	-0.252009	0.156802	0.359316	0.0542855	0.203196	0.184544	-0.297925	-0.0215869	0.128436	0.389251	-0.334631	0.422922
Pinoresinol	-0.0312251	-0.0629913	0.0945048	-0.00357546	-0.051127	0.194564	0.217732	-0.166558	-0.231308	-0.256559	-0.29464	-0.389472	-0.281088	-0.197956	-0.253085	-0.280562	0.229286	-0.388105	0.105784	-0.3055	0.258642	0.0292673	0.407906	0.0692773	-0.0117736	0.314485	0.248819	0.230337	-0.184459	-0.0124611	-0.391344	-0.101867	0.479624	-0.0812561	0.00993292	0.248041	0.228125	-0.217267	0.215631	0.323168	-0.150197	-0.144486	0.263314	-0.2929	0.250376	-0.300079	0.438296	-0.0876762	0.125224
SDMA/ADMA	0.686715	-0.532082	0.0327667	0.435323	-0.153134	-0.172649	-0.149026	-0.187272	-0.0696877	-0.228862	0.553901	0.344311	-0.214499	0.164937	-0.175796	-0.336598	-0.303773	0.232201	-0.0232601	0.571896	-0.390764	-0.511564	-0.474594	-0.336359	0.351577	0.228817	-0.31723	0.0289282	-0.369875	-0.0324193	0.331277	0.608232	-0.400347	-0.446289	-0.295492	-0.000703601	-0.0802249	0.375152	-0.291464	-0.215583	-0.383135	-0.197643	-0.184506	0.549013	-0.0109041	-0.0208113	-0.295371	0.681311	-0.349441
Guanine	-0.0558511	-0.0216668	0.214349	0.1084	-0.277774	0.038362	-0.0992461	-0.0383712	-0.0537321	-0.239299	-0.0557188	-0.0292896	-0.204249	-0.358907	-0.236527	-0.101171	-0.0973575	0.0708304	-0.261867	-0.0549971	0.746212	-0.567668	0.643516	-0.212372	0.155749	-0.241924	-0.362328	-0.0282981	-0.137359	0.0504627	-0.00743976	-0.0272875	0.536793	0.10696	0.645318	0.00210457	0.346984	0.11928	0.781906	0.504981	-0.0398718	-0.21219	0.383404	-0.0637837	0.322137	-0.183092	0.0488717	0.14321	-0.176415
PC (14:0e/5:0)	0.300123	-0.106398	-0.0972757	0.0643477	-0.0918664	0.0369188	-0.138461	0.0350032	-0.0288823	0.145866	-0.105343	-0.233921	0.138834	0.0756587	0.169183	-0.0352737	-0.0725715	-0.268605	-0.0906699	-0.0893345	0.0708529	-0.148273	0.26965	-0.236019	0.0602014	-0.323091	-0.170563	0.0788958	-0.222071	-0.0687829	-0.238759	0.0691381	0.125368	-0.154942	-0.108669	0.0467526	-0.0599807	-0.269887	0.386198	0.395917	0.00524254	-0.0674845	0.478435	-0.0848973	0.0268914	-0.127014	-0.047519	0.0924005	-0.10069
SM (d14:1/28:1)	0.132951	0.271334	-0.437813	0.0580016	0.35548	-0.311095	-0.390108	0.0146082	0.163796	0.401166	0.220585	0.171545	0.0908407	0.2314	0.0497908	0.0840405	0.275439	0.146198	-0.0318966	0.221413	-0.0597629	0.471532	-0.28169	-0.120455	0.293525	0.0937837	0.29857	0.10414	-0.154557	0.190597	0.166211	-0.17316	-0.199215	-0.0708929	-0.125943	0.0666861	-0.148309	0.172946	-0.201165	-0.380743	0.253896	-0.0394005	-0.104042	0.226948	0.234709	-0.32059	0.346657	0.0715854	-0.095178
(5-methyl-3-isoxazolyl)[4-(5-propyl-2-pyrimidinyl)piperazino]methanone	-0.0163746	0.135616	-0.129576	-0.293246	-0.0413062	0.115295	-0.107274	0.260451	0.262549	0.0598882	0.00802389	0.280834	-0.262449	-0.0803559	-0.340683	0.192674	0.295715	0.370042	0.118687	0.0243017	0.351371	0.185793	0.308845	-0.0959165	0.250609	-0.0430175	0.301353	-0.0321631	-0.16394	0.110918	0.29461	-0.232227	0.0322545	0.281848	0.27384	-0.0456856	0.26134	-0.136738	0.366062	0.137939	0.023245	0.0603681	0.488023	-0.0236326	0.392203	-0.38875	0.351879	-0.0131711	0.0400432
Stercobilin	0.107421	-0.336552	0.18437	0.540579	0.0690961	-0.128824	-0.243548	-0.314261	0.0682657	0.156822	0.170727	-0.0662612	0.122738	0.0258807	0.129539	-0.22842	-0.153935	-0.175419	-0.323733	0.190639	-0.25751	-0.354382	-0.311652	-0.187943	0.107838	-0.0724399	-0.0787094	0.171692	-0.153971	0.389484	-0.0786981	0.217143	-0.0697154	-0.417094	-0.292606	0.164734	-0.221208	0.0589851	-0.299393	-0.279747	0.178401	-0.225184	-0.43558	0.155943	0.142201	-0.0182551	-0.123365	0.336489	-0.194228
Kynurenic acid	-0.258406	-0.21656	0.472517	-0.0940303	0.038969	0.0408782	0.0132995	-0.216053	0.477813	0.299065	-0.158399	-0.0861266	0.322823	-0.162432	0.22909	-0.0765328	-0.0265411	-0.0832517	-0.148002	-0.166184	-0.0190845	-0.236709	-0.106791	0.129303	-0.2941	-0.170599	0.0120597	0.129016	0.226662	0.663708	-0.0831061	-0.495786	0.0465099	0.0938887	0.0130691	0.149135	-0.147833	-0.29915	-0.121806	-0.398649	0.742594	-0.0622954	-0.219531	-0.165573	-0.0498833	0.0183895	-0.331088	-0.163609	0.062237
6-Pentyl-2H-pyran-2-one	-0.393506	0.0552957	0.235956	-0.17715	-0.0140443	0.34664	-0.228064	-0.10979	0.384827	0.212267	-0.120918	0.0943608	0.071699	0.247354	-0.00371378	0.0921496	-0.00716553	0.132033	-0.152144	-0.102783	0.00865595	0.0784429	0.146042	0.264778	-0.105936	-0.302009	0.102366	-0.111257	0.0848066	0.469439	0.102536	-0.34085	-0.0517662	0.0112236	0.122884	-0.122815	-0.0341728	-0.136351	0.103587	-0.00112603	0.422997	0.0166873	0.113197	-0.140433	0.160717	-0.162369	-0.106118	-0.186913	0.247272
Linalool	0.0571182	0.267057	-0.329872	0.0364853	0.0625705	-0.288024	-0.172567	0.0918349	0.0359646	0.122758	0.209021	0.368517	-0.170896	0.116928	-0.267119	0.35133	0.333187	0.429139	0.160674	0.223938	0.269031	0.244462	0.134664	-0.120029	0.392221	-0.268848	0.348359	0.152318	0.0698686	0.0171607	0.374838	-0.159601	0.0126556	0.241865	0.107091	0.12375	-0.0768888	0.0154971	0.26316	0.0628696	0.133447	0.170939	0.152209	0.192086	0.51314	-0.384158	0.141899	0.00944309	-0.23908
N,N,N-trimethyllysine	-0.137172	0.292645	-0.355996	0.0720368	0.244755	0.0826384	-0.354482	0.0682991	-0.115564	0.424641	0.0602939	0.101739	0.17155	0.187062	0.219919	-0.141786	0.279659	0.0950897	-0.231305	0.0863256	0.117835	0.312276	0.0693144	-0.111563	0.298929	-0.145181	0.101572	0.0508029	-0.338711	-0.0979984	0.101734	-0.0161816	-0.0272953	-0.0368999	-0.0133577	0.0200983	0.112209	-0.0376352	0.060323	-0.108415	0.00279174	0.0197806	0.311979	0.0347803	0.283471	-0.237223	0.404732	0.0917278	0.208323
L-(-)Histidinol	0.598829	-0.243137	-0.0139513	0.0874449	-0.291835	-0.121742	-0.191	-0.317118	-0.117491	-0.0558922	0.580803	0.645655	-0.175371	0.149804	-0.205262	-0.453237	-0.102694	0.605088	-0.00900101	0.582198	0.0246906	-0.316009	-0.0634075	-0.333528	0.575914	0.108049	-0.24351	0.200754	-0.542905	-0.0826029	0.642425	0.0733358	-0.12652	-0.314004	-0.0515518	0.18705	-0.0854736	0.388804	0.127893	-0.0810918	-0.259409	-0.171914	0.380753	0.574784	0.405891	-0.347573	-0.0809806	0.579085	-0.299097
Biochanin A	0.0573267	-0.549779	0.577204	0.0299634	-0.345051	0.383541	0.185665	-0.47104	-0.0746798	-0.046796	0.194785	0.160693	0.0848461	-0.0933938	0.111032	-0.412004	-0.258508	0.111698	0.0442035	0.187852	-0.0456799	-0.619245	0.117486	-0.112365	0.179737	-0.290366	-0.286015	-0.163678	-0.147333	0.319529	0.159334	0.3381	0.104337	-0.28601	-0.128401	-0.144245	-0.0846833	-0.132189	0.099752	0.162985	0.136275	-0.0274966	0.123283	0.185511	0.171938	0.0892028	-0.223056	0.181126	0.0337583
PC (4:0/16:3)	0.0801468	-0.193185	0.0315159	0.517765	-0.375953	0.0723739	-0.117853	-0.138717	-0.173979	0.0365759	0.317685	0.0619884	-0.132266	0.361892	-0.10198	-0.0292583	-0.0445341	-0.0436019	0.0366009	0.31964	-0.306745	0.178188	-0.297151	-0.378676	0.371225	-0.185363	0.219127	0.209218	-0.423992	-0.0204049	0.0453518	0.00583531	-0.327619	-0.487151	-0.333294	0.195416	-0.507894	0.108208	-0.384297	-0.345614	-0.188138	-0.186814	-0.293987	0.305129	0.363268	-0.0457583	0.305532	0.363592	-0.236104
2-(acetylamino)-3-[4-(acetylamino)phenyl]acrylic acid	-0.240643	-0.170678	0.335502	-0.0569859	-0.130949	0.375472	0.0469529	-0.182328	-0.0196846	-0.171392	-0.0298423	-0.0742699	0.0315689	0.316133	0.0568775	-0.160332	-0.124144	0.0172861	0.18783	-0.0281685	0.250366	-0.366808	0.272108	0.0199769	-0.0866237	-0.151971	-0.046732	-0.175425	-0.0311957	0.0579995	-0.0599975	-0.128271	-0.0098102	0.227188	0.384052	-0.182379	0.291336	-0.106115	0.337384	0.0434783	0.113131	0.198908	0.255279	-0.0255518	-0.18167	-0.136565	-0.591302	0.0139588	0.380623
2-{[2-(4-methylpiperazino)phenyl]methylene}hydrazine-1-carbothioamide	0.129947	-0.0340688	0.0481926	0.197914	-0.212794	-0.0924346	-0.234142	-0.275317	0.0275104	-0.0239891	0.346692	0.585926	-0.198262	0.0504039	-0.274143	-0.110256	-0.0598493	0.597487	-0.240689	0.373929	0.108523	-0.262011	0.097537	0.128844	0.37882	-0.273823	-0.230228	0.0425306	0.0365289	0.13871	0.59154	0.0291108	0.0199819	-0.0495685	0.0748331	0.0344566	-0.0841859	0.261523	0.240411	0.14107	0.015636	-0.0280818	0.150411	0.31713	0.582178	-0.259413	-0.150494	0.290801	-0.279443
LPC 15:1	-0.148972	-0.102896	0.221409	-0.202495	0.0734989	0.128824	-0.126477	0.228751	0.28564	0.0876346	-0.00562434	-0.0198527	0.232111	0.040839	0.293571	0.0800252	-0.466229	-0.0106999	-0.140252	-0.0274049	-0.183153	-0.0806499	-0.271316	0.051525	-0.279711	-0.0223195	-0.228616	-0.279395	0.219855	0.124506	-0.0161216	-0.259034	-0.35461	0.354618	0.0389921	-0.248514	-0.00733653	0.00465677	-0.251563	-0.421186	0.161008	0.0580592	-0.226387	0.00188751	-0.489975	0.133859	-0.385442	-0.0840618	0.120469
allantoate	-0.486175	0.304849	0.0653319	-0.41176	-0.0532834	0.403691	8.26228e-05	0.258594	0.0451617	-0.0978667	-0.269343	-0.0482542	-0.106804	-0.13653	-0.0801469	0.254077	-0.0684376	0.0928443	-0.0185649	-0.277764	0.48647	0.132688	0.596801	0.225333	-0.0759125	-0.220499	0.00422092	-0.456712	0.215737	-0.0398928	-0.0254178	-0.196074	0.249485	0.518958	0.505032	-0.422346	0.379899	-0.0972224	0.539205	0.478885	-0.0226621	0.201653	0.398744	-0.277185	0.0730669	-0.101132	0.194193	-0.351329	0.312309
L-5-Hydroxytryptophan	0.0208785	0.103819	0.0285977	0.383458	-0.29388	-0.224583	-0.259944	-0.153434	-0.234934	-0.237667	0.340747	0.236028	-0.117629	0.287342	-0.13944	0.00566337	-0.309754	0.25534	-0.196308	0.3292	0.172371	-0.248137	-0.0219925	-0.228533	0.194103	-0.17826	-0.354468	0.10995	-0.129451	-0.222865	0.241712	-0.0513333	-0.0424714	-0.209774	0.336707	0.120915	-0.208024	0.634254	0.11811	-0.0690633	-0.208239	-0.20704	-0.22922	0.353542	0.0817769	0.0299704	-0.27831	0.289762	-0.335445
PC (22:5/22:6)	0.293301	0.0839325	-0.336549	-0.126572	0.497848	-0.290639	-0.33661	0.391064	0.295394	0.230471	-0.00235497	-0.0237317	0.161628	-0.192083	0.157378	0.0353141	0.0890516	-0.0227457	-0.260717	0.00855764	0.129086	-0.183119	-0.161425	-0.10937	-0.0633911	0.0118695	-0.482104	-0.147308	0.0523098	0.12575	-0.0161763	0.40138	-0.0218912	0.0688669	0.175806	-0.192504	0.335747	0.06664	0.100854	-0.0484045	0.267223	-0.214289	0.0899467	0.00952386	-0.3711	0.0871909	0.065635	-0.0202549	-0.129601
PC (21:2/20:4)	-0.32294	0.462938	-0.388427	-0.018074	0.644398	-0.448452	-0.133601	0.286645	0.235969	0.492871	-0.150552	-0.00641808	0.458779	-0.125195	0.412169	0.287922	0.325073	0.0305175	-0.227184	-0.126335	-0.0836399	0.324446	-0.383501	0.209907	-0.30095	0.0474457	0.126833	0.0341952	0.401945	0.0173847	-0.00310127	-0.116127	-0.148006	0.349338	0.0450961	0.0191579	0.0885082	-0.0303707	-0.329923	-0.49043	0.368543	0.227239	-0.418897	-0.166733	-0.327721	0.286533	-0.147901	-0.237778	0.154991
Coumarin	0.0598439	0.00179257	0.10611	-0.0692771	-0.180339	0.0365569	-0.0189976	-0.0868577	0.0886385	-0.221432	-0.154063	-0.0317069	-0.265591	-0.233171	-0.337123	-0.178321	0.155972	0.0938903	-0.0611267	-0.144445	0.705358	-0.374792	0.642839	0.0567081	0.0720223	-0.0211359	-0.145641	0.0757212	-0.0626539	0.0947547	-0.0104928	-0.2918	0.480206	0.27495	0.592283	0.0756359	0.461389	-0.069688	0.808366	0.445418	0.0834133	-0.0819131	0.628429	-0.155089	0.325377	-0.43211	-0.0616472	0.0724427	-0.0207686
PC (18:2e/18:0)	-0.398513	0.361923	-0.226058	0.0455107	0.400146	-0.202665	0.0983592	0.0010784	-0.0367244	0.160137	-0.103851	-0.0716646	0.28586	0.197976	0.254678	0.0621468	0.371197	-0.0132892	0.109873	-0.0867124	-0.0871662	0.290706	-0.307223	0.166292	-0.289581	0.316642	0.327673	0.078599	0.10087	-0.184323	-0.0686342	-0.101197	-0.172689	0.113685	0.165593	0.0601038	0.169556	0.11074	-0.340757	-0.478668	0.0666682	0.274399	-0.379082	-0.110956	-0.394035	0.282621	-0.300156	-0.121309	0.421707
PE (20:3/20:3)	0.182786	0.104291	-0.299461	0.114783	0.154366	-0.288513	-0.428858	0.124088	0.060323	0.336043	0.615692	0.725583	0.154934	0.0963158	0.142697	0.155239	-0.0863092	0.742943	-0.128117	0.638567	0.0499161	-0.119437	-0.240876	-0.458953	0.575027	-0.276217	-0.101518	-0.242456	-0.208642	-0.0214102	0.732374	0.351232	-0.366918	0.0857665	0.0942738	-0.259779	-0.00515633	0.39243	0.026891	-0.229895	-0.0556158	0.179894	-0.0215902	0.585492	0.222285	-0.0527965	-0.103422	0.406359	-0.19426
L-Pyroglutamic acid	0.0820518	-0.189365	0.282557	-0.0931375	-0.512276	0.4151	0.126664	-0.0867136	-0.262639	-0.432815	-0.116321	0.0437562	-0.53928	-0.0232147	-0.554083	-0.272657	0.0558591	0.0334204	0.0106343	-0.120526	0.297866	-0.206442	0.577673	0.0498539	0.151296	-0.171149	-0.184742	0.381269	-0.235313	-0.12711	0.0455788	-0.0949894	0.430522	-0.209822	0.0555077	0.387745	0.0307117	-0.180471	0.438637	0.5319	-0.24851	-0.363753	0.629119	-0.136448	0.484058	-0.337455	0.369314	-0.0378951	-0.161717
16,16-Dimethyl prostaglandin A2	-0.305073	0.252986	-0.177389	-0.152663	0.279424	0.104203	-0.311139	0.349736	0.512215	0.531146	-0.227967	-0.219911	0.265661	0.00663018	0.239343	0.396637	0.139305	-0.231524	-0.219876	-0.220877	-0.116356	0.502474	-0.151408	0.0760319	-0.15263	-0.28874	0.125066	-0.289658	0.126834	0.448263	-0.218599	-0.126097	-0.180408	-0.00237911	-0.0365138	-0.315403	-0.119715	-0.208941	-0.17731	-0.173242	0.517423	-0.0852365	-0.161768	-0.227683	-0.0651919	0.124792	0.492976	-0.313314	0.106193
DL-Carnitine	0.209275	-0.29209	0.187585	-0.0869852	0.127893	-0.0978866	-0.0871712	0.11328	0.235803	0.139974	0.129321	0.071955	0.298221	-0.257733	0.33793	-0.150322	-0.402585	0.0181951	-0.232976	0.118712	-0.233016	-0.399148	-0.37412	-0.24513	-0.138805	0.158467	-0.381952	-0.141548	-0.079475	0.139297	0.0691679	0.181787	-0.226589	-0.0303104	-0.099459	-0.114322	0.0275108	0.102904	-0.28673	-0.350548	0.0368373	-0.119503	-0.227835	0.130351	-0.460373	0.285008	-0.293598	0.179671	-0.0646969
PC (17:0/18:5)	0.217025	0.0853827	-0.211395	0.0985845	-0.134857	-0.217837	-0.322893	0.313575	0.137964	0.000758634	0.27755	0.250834	-0.237099	0.335716	-0.327721	0.348155	0.131566	0.251255	0.0818829	0.271248	0.140133	0.0895464	-0.125855	-0.376367	0.269339	-0.405669	-0.119805	0.243674	-0.11641	0.022667	0.25455	-0.0555942	-0.2113	-0.129009	0.172094	0.191286	-0.268095	0.177742	0.0686654	-0.193345	0.186877	-0.316125	-0.00216648	0.282157	0.138915	-0.137365	0.184781	0.0461624	-0.484933
Leucine enkephalin amide	-0.0791309	0.270862	-0.273358	0.102647	0.0393747	-0.0116226	-0.00174953	-0.0984486	0.0100819	-0.0146636	-0.236791	-0.319873	-0.156828	0.204785	-0.215946	0.0143174	0.496268	-0.262286	0.166607	-0.21962	0.236297	0.386055	0.247146	0.119035	-0.0102246	0.210128	0.425501	0.135482	-0.186129	-0.00630601	-0.316583	-0.25343	0.176792	-0.11021	0.223019	0.090915	0.170459	-0.0540484	0.245106	0.161674	0.0317979	-0.003571	0.221489	-0.220774	0.201737	-0.265506	0.284317	-0.0423992	0.197677
PC (14:0e/3:0)	0.394255	-0.437493	0.245426	0.0745255	-0.478244	0.246222	-0.162039	0.275498	0.253872	-0.327121	-0.169367	-0.38845	-0.442462	0.149763	-0.406083	0.194948	-0.455538	-0.446013	-0.0155662	-0.184977	-0.0657954	-0.107344	0.199776	-0.0921881	-0.0707019	-0.298529	-0.144118	0.130727	0.03334	0.176943	-0.395928	-0.386195	-0.0767862	0.0628496	-0.193067	0.123138	-0.275332	-0.360667	0.222514	0.256046	-0.00360974	-0.352997	0.268001	-0.142726	0.0873734	-0.446074	0.05664	0.0179721	-0.446733
ACar 18:2	0.319537	-0.388755	0.199529	0.168894	-0.195378	-0.00858205	-0.405456	-0.111954	0.320927	0.112669	0.602482	0.709832	-0.237993	0.138213	-0.312382	-0.0584254	-0.170998	0.636088	-0.143759	0.612685	-0.165421	-0.292188	-0.313059	-0.296158	0.554024	-0.302701	-0.13749	0.0681687	-0.218684	0.522468	0.707078	0.120241	-0.351198	-0.244979	-0.190739	0.050764	-0.301351	0.202984	-0.180262	-0.353413	0.216904	-0.26997	-0.1008	0.561448	0.538978	-0.325136	0.0768344	0.408003	-0.458469
5-[(10Z)-14-(3,5-dihydroxyphenyl)tetradec-10-en-1-yl]benzene-1,3-diol	0.05998	0.14003	-0.217632	-0.222201	0.673344	-0.238788	0.168858	-0.144257	-0.160414	-0.172075	-0.132502	-0.0681379	-0.0128256	-0.125595	-0.0232703	-0.171221	0.28092	-0.055643	0.172258	-0.124728	-0.0461175	-0.0443565	-0.050992	0.246755	-0.214819	0.734679	0.207654	0.069095	0.11067	-0.0844681	-0.0694967	0.461451	0.26125	-0.0280892	-0.0488391	0.0613326	0.474406	0.135939	-0.116816	0.158342	-0.138283	0.144353	-0.11964	-0.128368	-0.345176	0.0143705	-0.146582	-0.18128	0.306774
Lysopg 18:1	-0.0545079	-0.122755	0.186234	0.062493	-0.232148	0.226942	0.147482	-0.386311	-0.164353	0.0155277	0.00536181	-0.00435931	-0.0339409	-0.163031	-0.0364483	-0.43196	0.227463	0.0365506	0.0742996	0.00938665	0.38642	-0.180103	0.417725	-0.147525	0.285592	0.0671378	0.188929	0.0671995	-0.423059	0.0807724	0.00159833	-0.133479	0.342517	-0.0804472	0.189786	0.0825002	0.223446	-0.125992	0.381178	0.176743	-0.0397741	0.0357404	0.437393	-0.00913068	0.469643	-0.280037	0.20095	0.222175	0.209164
Cortisone	0.116316	-0.424905	0.44818	0.0367442	-0.301233	0.152017	0.0499993	-0.0504773	0.100695	-0.0553947	-0.0980859	-0.159536	0.0489279	-0.224378	0.0721572	-0.0892116	-0.369638	-0.184904	-0.145648	-0.108709	0.0964391	-0.528239	0.224942	-0.0808937	-0.0834083	-0.423354	-0.349167	0.0562021	0.147134	0.232803	-0.159321	-0.143458	0.175947	0.131536	-0.0659029	0.0831725	-0.13027	-0.359213	0.266838	0.184225	0.231511	-0.113037	0.175233	-0.0940972	0.0425971	-0.0729333	-0.287167	0.0114985	-0.230429
Allocholic acid	0.176407	-0.302774	0.331979	-0.161841	-0.453506	0.259031	0.24855	0.0436132	-0.195294	-0.268791	-0.118259	-0.0880901	-0.0808563	-0.144403	-0.051641	-0.118994	-0.257074	-0.0994472	0.0658407	-0.131641	0.146041	-0.431611	0.392916	-0.202518	-0.0664407	-0.27157	-0.343259	0.150564	-0.131477	-0.239954	-0.0877686	0.030275	0.249046	-0.0611684	0.00933369	0.173241	-0.0414664	-0.258913	0.375314	0.445867	-0.214387	-0.128282	0.471487	-0.112437	-0.0656516	0.0774241	-0.155586	-0.018593	-0.13276
LPC 16:2	0.391708	-0.624706	0.495576	0.325752	-0.629571	0.190073	-0.346942	0.125212	0.216262	-0.258067	0.10018	-0.0335912	-0.409179	0.240803	-0.421159	-0.030417	-0.572276	-0.179055	-0.34067	0.0929666	-0.255236	-0.425004	-0.0911454	-0.319685	0.0398375	-0.472308	-0.423052	0.574962	-0.214215	0.26202	-0.0483312	-0.35684	-0.18208	-0.380919	-0.339512	0.574208	-0.593286	-0.151768	-0.10614	-0.152866	0.0268864	-0.719381	0.00773312	0.0884291	0.216675	-0.323375	-0.0413131	0.248948	-0.70976
N-(4-methoxyphenethyl)-N'-(2-methylphenyl)thiourea	0.218259	-0.294219	0.192496	0.143859	-0.412175	0.122679	0.0259377	-0.106762	-0.0478717	-0.199658	0.0936435	0.0560491	-0.323763	0.193714	-0.340491	0.0252903	-0.0358046	0.0537426	0.202367	0.089403	0.153495	-0.177904	0.269041	-0.00484501	0.243885	-0.486525	-0.0102516	0.219774	0.128465	0.110597	0.0551728	-0.25211	0.0638469	0.164889	-0.0858082	0.200158	-0.230871	-0.319684	0.33776	0.197368	0.170997	-0.0199739	0.326743	0.0963939	0.45287	-0.461037	-0.115193	0.0477791	-0.326405
16,16-Dimethyl prostaglandin A1	-0.483912	0.246477	0.10378	-0.148515	-0.282184	0.474253	0.11312	-0.0670121	-0.316014	-0.036159	-0.201868	0.0696824	-0.182078	-0.030787	-0.166269	-0.0680503	0.237816	0.13297	-0.04226	-0.198786	0.423041	0.200558	0.657399	0.275661	0.166234	-0.439046	0.0633959	0.0500428	0.041552	-0.148711	0.0797958	-0.242617	0.426322	0.173153	0.18109	0.0700562	0.0759122	-0.269645	0.45571	0.462746	-0.0350702	0.069728	0.542934	-0.235022	0.593506	-0.219723	0.46416	-0.273909	0.19813
4-(β-D-Glucopyranosyloxy)benzyl 4,5-dideoxy-3-C-methylpentonate	-0.00339151	0.291961	-0.402141	0.245609	0.229306	-0.38208	-0.200853	0.090721	0.367452	0.412892	-0.136736	-0.322997	0.271273	0.0927539	0.241495	0.319361	0.137452	-0.318862	-0.0947184	-0.122029	-0.210844	0.58724	-0.327159	0.1168	-0.145874	0.151381	0.422099	-0.0895648	0.141796	0.159561	-0.329808	-0.469198	-0.294068	0.140135	-0.105789	-0.113706	-0.199058	-0.0198265	-0.239466	-0.354471	0.242938	0.174178	-0.343168	-0.108014	-0.0497609	-0.0426414	0.0321663	0.0433539	0.00995582
Prolylleucine	0.0934822	0.0633499	-0.146752	0.0917196	0.312567	-0.111262	-0.455264	-0.163383	0.140072	0.386249	0.237239	0.216764	0.428668	0.142681	0.463517	-0.238929	-0.28475	0.182579	-0.437176	0.263881	-0.218522	-0.142687	-0.271109	-0.126169	0.0833886	0.161425	-0.232455	-0.256265	-0.315475	0.0854896	0.214945	0.218055	-0.257976	-0.249194	-0.0296149	-0.264279	0.0920528	0.39696	-0.130392	-0.1917	-0.0626799	0.0317044	-0.0625119	0.236233	-0.194982	0.0769625	-0.301561	0.353269	0.188092
Indole-5-Carboxylic Acid (98%)	0.263338	-0.254645	0.164827	-0.108516	0.0477758	0.180188	-0.0983214	-0.160917	0.0125901	-0.340844	-0.0683687	-0.0905884	-0.291568	-0.151607	-0.246236	-0.218387	-0.342427	-0.0957405	-0.106485	-0.0642075	0.0884788	-0.376713	0.355464	0.0737206	0.0329736	0.329439	-0.0907465	-0.17847	-0.106383	0.151472	-0.0890216	0.243153	0.277047	-0.0401318	-0.00922071	-0.156706	0.346546	0.0643742	0.343453	0.581334	-0.286862	-0.0774075	0.300016	-0.0626675	0.0770055	-0.371873	-0.0550987	0.117332	0.0361512
4-Ethylbenzaldehyde	0.269805	-0.365452	0.321993	0.0450027	-0.547567	0.270529	0.206307	-0.116079	-0.13152	-0.418054	-0.163949	-0.351754	-0.313266	0.0434621	-0.296095	-0.139113	-0.177208	-0.371171	0.17619	-0.186044	0.164135	-0.298566	0.407661	-0.0659364	-0.043154	-0.198909	-0.222667	0.159145	-0.0979989	-0.0335041	-0.354052	-0.1117	0.269487	-0.171731	0.0193456	0.157213	-0.114682	-0.244536	0.404845	0.468236	-0.0745989	-0.261567	0.391611	-0.129825	0.0875832	-0.167057	-0.00793947	0.00120328	-0.220505
Pro-Leu	0.448148	-0.194311	-0.0993088	0.285208	-0.205773	-0.0590228	-0.189107	-0.0634447	-0.159552	0.00798219	0.0800449	-0.0989583	-0.0492803	0.144393	-0.0251974	-0.115112	-0.078058	-0.157943	-0.094073	0.0972602	0.0809558	-0.256875	0.222294	-0.327312	0.256727	-0.33529	-0.216198	0.236233	-0.304339	-0.111352	-0.106652	0.148495	0.120601	-0.276433	-0.147001	0.19882	-0.146652	-0.126012	0.36643	0.358978	-0.103284	-0.178255	0.415088	0.0942253	0.231607	-0.245986	-0.0201551	0.27262	-0.312034
Rhamnetin	0.211153	0.0575125	-0.144007	-0.0846819	0.0033924	-0.067084	-0.0887009	0.0551282	0.260477	0.0411205	-0.104492	-0.047058	-0.0280148	-0.150521	-0.0369435	-0.135148	-0.0435915	-0.0400998	-0.199101	-0.0924457	-0.0804493	0.151825	-0.0549297	0.182263	-0.112113	0.442639	-0.0288008	-0.0948649	-0.125435	-0.00490848	-0.0474441	-0.239075	-0.0890586	0.0219249	0.0285422	-0.0930694	0.166527	0.10965	-1.69978e-05	-0.0204256	-0.173445	-0.0611132	0.169495	-0.0954368	-0.0488542	-0.0891278	0.0784521	0.169244	0.0627062
N1-isopropyl-2-(1H-2-pyrrolylcarbonyl)-1-hydrazinecarboxamide	0.0272425	0.147881	-0.2358	-0.0111264	-0.00989194	0.0705289	0.0472552	-0.113039	-0.0801866	0.0660651	-0.0966437	-0.0921099	-0.0418711	0.293657	-0.0737555	-0.0588852	0.411834	-0.0454331	0.281098	-0.0718657	0.135957	0.286826	0.243834	-0.0442188	0.112355	0.133454	0.48113	0.175212	-0.328754	-0.157394	-0.0921167	-0.224612	0.0417276	-0.0358787	0.0625983	0.132048	0.142603	-0.178754	0.253426	0.137129	-0.102176	0.192486	0.44844	-0.0945234	0.19231	-0.313914	0.0395528	0.0677502	0.280892
Hydrocortisone	-0.0179284	-0.344579	0.390204	-0.00470664	-0.461029	0.39429	0.362166	-0.0576594	-0.359013	-0.361307	-0.0528405	-0.0247956	-0.11832	-0.0486372	-0.0393768	-0.138916	-0.282523	-0.0317871	0.142044	-0.0511028	0.00312851	-0.431007	0.314101	-0.0647531	-0.0345793	-0.250014	-0.201828	-0.00604198	-0.0366268	-0.333764	-0.0256651	0.221605	0.119211	0.0141575	-0.0665898	0.0222594	0.0154488	-0.249506	0.214936	0.402737	-0.393392	0.109183	0.287674	-0.0675009	-0.0386953	0.161315	-0.297428	0.0469461	0.0582749
2-Mercaptobenzothiazole	0.243637	-0.11521	0.0224921	-0.117959	-0.17997	0.166927	0.017813	-0.0177451	-0.100962	-0.129018	-0.103313	-0.0531989	-0.14723	-0.141348	-0.11794	-0.0267407	-0.144322	-0.0514165	-0.0179089	-0.0943107	0.179238	-0.190327	0.498031	-0.019176	0.13037	-0.185286	-0.118642	-0.082753	-0.0616952	-0.0736915	-0.0523596	0.149324	0.302861	0.0152862	-0.052522	-0.0796802	0.0964712	-0.205331	0.526631	0.713637	-0.197131	0.0254751	0.565703	-0.0971676	0.244527	-0.232497	0.0741261	0.0152081	-0.0860289
PC (16:0e/22:4)	-0.375477	-0.0679446	0.242764	0.35314	-0.133205	0.0444473	0.156836	-0.0515699	-0.126053	-0.155063	-0.099052	-0.168265	-0.0921276	0.0343731	-0.119195	-0.116031	0.259593	-0.134755	0.00774475	-0.0909744	0.192655	-0.193648	-0.0308716	-0.031511	-0.133171	-0.0729958	0.0633222	0.36129	-0.00271043	-0.0201452	-0.162638	-0.187282	0.0773725	0.0256053	0.264031	0.361664	0.0735998	-0.098001	-0.10602	-0.385642	0.111046	-0.116709	-0.269582	-0.128967	0.010283	0.097992	-0.116362	0.0244016	0.0640374
PC (19:2/20:5)	0.0962403	-0.383188	0.318354	-0.0314478	-0.153739	0.344938	0.123259	-0.18952	0.175019	-0.0349355	-0.197388	-0.254271	-0.0684681	-0.214758	-0.0410025	-0.167056	-0.0946172	-0.29309	-0.0387703	-0.194534	-0.0285413	-0.263273	0.235712	0.300544	-0.062427	-0.254351	-0.218986	-0.257096	0.22662	0.446963	-0.255954	0.191898	0.211474	-0.0399203	-0.182702	-0.264064	0.0260389	-0.420463	0.215788	0.418743	0.310473	-0.0662259	0.222378	-0.187851	0.173043	-0.0787376	0.0952569	-0.101353	-0.00616798
Styrene	-0.0172398	-0.0345945	0.00814041	-0.092373	0.40089	-0.246816	0.00821937	0.0815967	0.219977	0.225488	-0.167909	-0.0267847	0.285437	-0.330786	0.236249	0.0322496	0.139967	0.0170487	-0.119553	-0.139788	0.162229	-0.357243	0.0602813	0.00668067	-0.198378	-0.0406287	-0.00652357	0.111137	0.238793	0.181382	-0.0197284	0.0269314	0.179454	0.354097	0.0782479	0.107831	0.293939	-0.313496	0.178906	-0.00238499	0.326768	0.189847	0.0719197	-0.188591	-0.170061	-0.00260737	-0.437701	-0.0808226	0.0764222
1H-indene-3-carboxamide	-0.529554	0.282826	0.182767	-0.261111	0.0317621	0.314935	0.000174815	-0.0335357	-0.0931646	-0.188147	-0.244589	-0.128709	0.0344269	0.129205	0.0202496	-0.0687412	-0.0624952	-0.0614545	-0.128181	-0.255222	0.18716	-0.0134518	0.23837	0.134031	-0.343392	0.180636	-0.143942	-0.0933801	-0.136558	-0.122172	-0.11564	-0.0212713	0.208892	-0.217869	0.46875	-0.0688145	0.263182	0.312289	0.0912338	0.14805	-0.136609	-0.15349	-0.0124763	-0.243158	-0.357273	0.284742	-0.0246628	-0.265118	0.417441
3-Acetyl-2,5-dimethylfuran	0.301972	-0.352633	0.246001	-0.16276	-0.0842993	0.049563	0.226477	-0.15418	-0.147249	-0.0566691	0.0357233	0.0135448	0.172156	-0.215864	0.224066	-0.215197	-0.330394	-0.0594234	0.0499881	0.0210534	-0.208119	-0.391294	0.017025	-0.147781	-0.0487106	0.0276616	-0.22651	0.011483	-0.0566923	-0.0704054	0.00321985	0.286951	0.103159	-0.152367	-0.339889	0.041593	-0.106862	-0.134641	-0.0155992	0.232754	-0.146612	0.027026	0.118732	0.0473655	-0.195703	0.169788	-0.268515	0.0455782	-0.0644472
SM (d14:2/27:0)	-0.30896	0.639657	-0.486783	-0.0166578	0.612801	-0.46584	-0.0381031	0.005334	0.0184742	0.220323	-0.138009	-0.0178324	0.328278	-0.170107	0.303199	0.120735	0.242236	0.0695984	-0.190456	-0.116801	0.0191361	0.381539	-0.188888	0.373236	-0.261983	0.563362	0.216147	-0.232824	0.262685	-0.207357	-0.0103022	-0.00133831	0.0188318	0.24715	0.253676	-0.222039	0.346011	0.404499	-0.156505	-0.137154	-0.0951705	0.356915	-0.3727	-0.133421	-0.295332	0.272627	-0.141342	-0.0914285	0.360803
Isorhapontigenin	-0.130885	-0.101604	0.251638	-0.137201	-0.485512	0.367788	0.335921	-0.0543456	-0.194929	-0.248455	-0.0888403	0.0393331	-0.194809	-0.167153	-0.143012	0.0974298	-0.257894	0.0728362	0.183699	-0.0931586	0.0247916	0.0668955	0.41608	0.0543923	0.0848544	-0.0565748	0.294809	-0.193701	-0.00409294	-0.228326	0.0392648	-0.184057	0.103328	0.223934	-0.0908705	-0.133307	-0.0528395	-0.199055	0.232966	0.46965	-0.467995	0.313203	0.283085	-0.104296	0.313254	-0.0773717	0.0506827	0.00718159	0.113563
Picolinamide	0.0121372	-0.106673	0.125302	-0.00290745	-0.311712	0.0311288	0.211438	0.329764	-0.0787527	-0.206361	-0.165629	-0.156938	-0.326483	-0.205244	-0.35911	0.116014	0.232416	-0.165639	0.134952	-0.186749	0.241287	0.0150001	0.158705	-0.216127	-0.0146808	-0.209275	0.0266529	0.51221	-0.0205185	-0.114576	-0.157375	-0.289537	0.203859	0.0825424	0.0312487	0.520822	-0.13567	-0.347245	0.0575765	-0.0697643	0.0350009	-0.32415	0.116396	-0.181928	0.176228	-0.0740427	0.427766	-0.165527	-0.340782
D-α-Tocopherol	0.320753	-0.188189	0.0570291	-0.0922299	-0.210625	0.155602	-0.103114	0.0653171	0.0898699	-0.205317	-0.0934771	-0.0937133	-0.291029	-0.0712424	-0.290564	0.0597583	-0.176762	-0.0817265	-0.0134626	-0.0870367	0.232992	-0.240218	0.477072	-0.0445179	0.12034	-0.214433	-0.156511	-0.0855425	-0.0343221	0.101362	-0.0895944	0.0634537	0.241118	0.0434685	0.0514537	-0.0965022	0.109117	-0.187689	0.576602	0.66016	-0.066654	-0.105628	0.540767	-0.0809009	0.239825	-0.36395	0.0680353	0.0288428	-0.204764
N-Acetylornithine	-0.114032	0.131865	-0.0336027	-0.0527572	0.224831	-0.143753	-0.162782	0.0925591	0.368431	0.309957	-0.323573	-0.249591	0.158386	0.0547762	0.0452715	0.166067	0.306652	-0.281068	-0.209783	-0.318305	-0.0245016	0.156043	-0.0726519	0.305369	-0.339957	-0.370616	-0.1391	0.365323	0.377923	0.419292	-0.251832	-0.319783	0.137983	-0.0743662	-0.0801894	0.31927	-0.248617	-0.337059	-0.0519694	-0.135789	0.76983	-0.293735	-0.0778375	-0.313307	-0.0442834	0.00326445	0.0708578	-0.424864	-0.173499
1,2-dihydroxyheptadec-16-yn-4-yl acetate	-0.0253701	-0.192846	0.28216	-0.312893	-0.304954	0.432273	0.263912	-0.0689786	0.229728	-0.0327507	-0.337008	-0.353906	-0.089038	-0.0778566	-0.1123	-0.041747	0.0550423	-0.378924	0.206345	-0.356952	-0.0920297	0.221418	0.213381	0.132826	-0.200927	0.0663006	0.213172	-0.0455824	-0.115958	0.282777	-0.359032	-0.285398	0.121749	-0.209892	-0.146536	-0.0392153	-0.119514	-0.387466	0.0377154	0.223056	0.146072	-0.142565	0.257818	-0.317018	0.0495834	-0.0278845	0.376342	-0.234826	0.151298
3-Hydroxy-3-methylbutanoic acid	-0.287546	0.29528	-0.103808	-0.132964	-0.212433	0.00589473	0.102493	0.0874143	0.0398298	0.316521	0.0977711	0.372793	0.0993604	-0.144876	-0.0075872	0.327348	0.420521	0.458773	0.154617	0.107895	0.364818	0.231261	0.26861	-0.187137	0.322427	-0.543018	0.232894	-0.0764634	-0.034977	0.0172006	0.385873	-0.0898401	0.104354	0.112123	0.270659	-0.0809258	-0.108181	-0.120033	0.318159	0.12916	0.216693	0.20715	0.238897	0.0683239	0.492905	0.113016	0.349853	-0.103551	-0.028499
PC (22:6/22:6)	0.473523	0.124908	-0.455339	-0.178776	0.148035	-0.162652	-0.318065	0.467789	0.274733	0.108772	-0.0823331	-0.129179	-0.105011	0.00726906	-0.123044	0.114133	0.179922	-0.102362	-0.0393482	-0.0719931	0.257312	0.1241	0.137507	-0.240033	0.0759158	0.0537071	-0.156803	0.0152863	-0.259755	-0.0723527	-0.123373	-0.0358438	-0.0217796	0.0792901	0.204901	-0.0433503	0.268938	-0.0701556	0.391395	0.169746	0.0130364	-0.220438	0.565859	-0.0573846	-0.10075	-0.28973	0.291909	0.0653001	-0.162592
Pregnenolone	0.0722535	0.010265	-0.0254096	0.0391987	-0.365244	0.108376	0.00704817	0.262749	-0.00818339	-0.0912139	-0.0747124	-0.0288668	-0.29973	-0.28479	-0.298592	0.26053	-0.0798907	-0.0789973	-0.150253	-0.0773679	-0.00880388	0.199202	0.184012	-0.0994607	0.149015	-0.235975	-0.0493672	-0.0278936	-0.0663377	-0.0536651	-0.0338031	0.10215	0.124954	-0.208508	-0.148672	-0.00706176	-0.249797	-0.0505465	0.0714474	0.392544	-0.260683	-0.264968	0.0697733	-0.0873505	0.38299	0.0755097	0.718606	-0.0295149	-0.366186
DAG (18:2/18:2)	0.135506	0.166217	-0.212483	-0.107709	-0.0692598	-0.134906	0.097386	0.0295122	-0.137076	-0.0775283	0.0200704	0.297187	-0.21187	-0.182493	-0.279875	0.173179	0.262488	0.366904	0.132186	0.0461969	0.344246	-0.0248155	0.463718	0.0140702	0.272762	-0.182169	0.151305	0.0839798	0.0689859	-0.198741	0.305078	0.0947647	0.310744	0.217135	0.110655	0.0749831	0.148162	-0.114443	0.548269	0.591755	-0.168436	0.230152	0.499041	-0.000668813	0.469098	-0.241841	0.0643296	-0.00736713	-0.135236
SM (d15:1/26:1)	-0.223843	0.433232	-0.364074	-0.243993	0.414837	-0.350725	0.135771	0.189621	0.241706	0.384086	-0.198022	-0.0195939	0.23448	-0.168478	0.110909	0.402366	0.606435	0.0486056	0.243398	-0.18638	0.078513	0.541954	-0.0800411	-0.00481679	-0.124485	0.190563	0.68003	0.141517	0.117523	0.0713964	-0.0166541	-0.276811	0.0369418	0.226442	0.0520873	0.128142	0.0487392	-0.193585	-0.102808	-0.199629	0.288949	0.290762	-0.122732	-0.20765	-0.00960213	0.0673106	0.192509	-0.293514	0.177304
2-(1,3-benzodioxol-5-yl)-7-ethylimidazo[1,2-a]pyridine	-0.565954	0.460619	-0.0687269	0.0359505	0.234094	-0.211164	0.240622	-0.0876533	-0.0923359	-0.0852013	-0.369566	-0.268101	0.100243	-0.0242403	0.00242562	0.0755252	0.502654	-0.134708	0.0658876	-0.361403	0.38445	0.105277	0.16362	0.367832	-0.43056	0.166465	0.185142	0.226919	0.329765	-0.136293	-0.252529	-0.313121	0.336604	0.229734	0.546073	0.223504	0.296505	0.0410104	0.133638	-0.0841542	0.22948	0.143413	-0.206761	-0.368132	-0.213879	0.208035	-0.268735	-0.337406	0.316878
2-[5-(2-hydroxypropyl)oxolan-2-yl]propanoic acid	-0.367939	0.174599	0.043313	-0.112235	0.202208	0.123927	-0.307799	-0.0421272	0.475831	0.458954	-0.131889	0.073071	0.263674	0.127311	0.173251	0.144068	0.136966	0.103163	-0.270026	-0.103636	-0.00424127	0.155884	0.00988565	0.25205	-0.114709	-0.321563	0.0877967	-0.113334	0.1485	0.523878	0.0803335	-0.280723	-0.0649777	0.033594	0.0915426	-0.137914	-0.0327278	-0.15267	0.0350397	-0.119451	0.584097	0.0388886	0.0118478	-0.151349	0.129259	-0.0687138	-0.0444179	-0.185798	0.207607
Methionine	-0.279795	-0.318175	0.52038	0.151614	-0.380428	0.524733	0.0368039	0.00107105	-0.194704	-0.28662	-0.219115	-0.242061	-0.373971	-0.0140774	-0.308393	-0.231181	-0.15773	-0.330828	-0.239781	-0.237259	-0.0136533	-0.140209	0.198405	0.140292	-0.0786033	-0.32858	-0.201536	0.416776	0.0302526	0.12415	-0.249716	-0.227097	0.240681	-0.147759	-0.223495	0.450389	-0.22687	-0.346035	-0.130926	-0.00992693	0.0264223	-0.482707	-0.00520913	-0.253415	0.310245	-0.175976	0.423545	-0.183473	-0.157883
PC (18:5e/22:6)	0.234318	-0.375493	0.0349498	0.834137	-0.325406	-0.00955999	-0.157551	-0.227456	-0.195731	-0.0878177	0.374759	-0.0749743	-0.0991848	0.296648	-0.0081209	-0.24561	-0.149276	-0.133996	-0.0587228	0.397156	-0.115253	-0.310889	-0.264878	-0.319525	0.374	-0.189106	-0.145482	-0.0796012	-0.30861	-0.0281746	-0.0820585	0.306545	-0.329059	-0.265585	-0.0560095	-0.114154	-0.12457	0.161389	-0.112769	-0.272758	-0.185171	-0.0702694	-0.248035	0.374355	0.200599	-0.0450802	-0.147129	0.651014	-0.189796
PC (16:2e/26:4)	0.116696	0.0466123	-0.0987881	0.0541655	-0.161774	-0.220557	0.209002	0.0936468	-0.157976	-0.213436	-0.000530673	-0.187969	-0.16711	0.230776	-0.236247	0.216499	0.289699	-0.162609	0.507544	-0.0251928	0.155004	0.169107	0.00578053	-0.453102	0.0116616	0.122484	0.421863	0.465838	-0.264971	-0.252393	-0.190604	-0.266747	0.0180906	-0.12036	0.128415	0.448238	-0.166916	-0.00712909	0.0108105	-0.157239	-0.0829513	-0.0799801	-0.0572035	0.0237857	-0.0958373	-0.0557676	0.028034	-0.0309814	-0.156811
SM (d14:1/29:1)	-0.148142	0.416204	-0.355298	-0.254345	0.557265	-0.278412	-0.13583	0.196435	0.404132	0.224209	-0.323622	-0.210649	0.060942	-0.0285293	-0.014006	0.30233	0.305159	-0.165645	-0.0185689	-0.318145	-0.0601962	0.595938	-0.130594	0.387654	-0.325817	0.437235	0.486722	0.0497999	0.316392	0.223455	-0.209933	-0.466673	-0.0184612	0.316333	-0.00674361	0.0376234	0.132581	-0.0730188	-0.17182	-0.191884	0.295716	0.119174	-0.173059	-0.312865	-0.139251	-0.212859	0.132688	-0.345202	0.179648
4-fluoro-N-(4-piperidinophenyl)benzenesulfonamide	0.191418	-0.0268239	-0.0757656	0.0455425	0.0074597	-0.228009	-0.067884	0.0307932	0.0177499	0.078204	0.0582085	0.11863	-0.0325078	0.312622	-0.155383	0.0165989	0.380473	0.0859106	0.144383	0.068705	0.0173981	-0.0445471	-0.101368	-0.273114	0.0268277	-0.186264	0.0759672	0.736623	-0.203415	-0.0189655	0.11298	-0.192302	-0.00452399	-0.266275	-0.0694157	0.680341	-0.236363	-0.149153	-0.0308447	-0.26042	0.257428	-0.251331	0.124332	0.0495976	0.0360994	-0.138997	-0.13123	-0.023956	-0.245458
threonine	0.0469509	0.16285	-0.180872	-0.183268	0.0620335	-0.144229	-0.0943546	0.560963	0.316254	-0.0247875	-0.15408	-0.097326	-0.0818124	-0.158734	-0.151404	0.561934	-0.0358173	-0.10519	-0.0729818	-0.150381	-0.100778	0.163876	-0.116469	-0.215609	-0.230394	-0.00788746	-0.0647787	-0.0975172	0.00336771	-0.0149806	-0.0955725	0.256013	-0.0968073	-0.207414	0.08891	-0.107395	-0.0573792	0.118432	-0.0889026	0.15589	-0.099146	-0.255285	-0.208529	-0.150776	-0.336396	0.400766	0.306806	-0.189159	-0.230817
1H-indol-3-yl(pyridin-2-yl)methanol	0.179687	0.0754233	-0.115907	-0.30394	-0.0528638	0.215836	-0.0634883	0.153804	-0.0147851	-0.152476	-0.245864	-0.160966	-0.231018	-0.195087	-0.160705	0.0387735	-0.215878	-0.135465	-0.0954598	-0.249276	0.189343	0.126831	0.536568	0.228181	0.0273174	0.0494995	-0.0572444	-0.25029	0.0759418	-0.109841	-0.158106	-0.0882862	0.284458	0.275503	-0.022829	-0.230266	0.22183	-0.166858	0.506051	0.728217	-0.275183	0.0534397	0.611255	-0.229242	0.194999	-0.382696	0.29363	-0.126139	0.0148865
PC (18:3e/22:4)	-0.0104802	-0.0693809	0.0438713	0.0432036	0.126968	-0.0680706	-0.249578	0.417813	0.279829	-0.0255516	-0.077868	-0.142239	-0.141082	-0.0112335	-0.140031	0.0883801	-0.100031	-0.195853	-0.2556	-0.0903314	-0.156836	0.0689028	-0.375912	-0.0942528	-0.223033	0.151691	-0.118796	0.28541	-0.00110813	0.139309	-0.146201	-0.254719	-0.225154	0.0118521	-0.0476678	0.289403	-0.0684579	0.0212692	-0.436915	-0.571516	0.102962	-0.439873	-0.360144	-0.0915712	-0.26036	-0.0185973	0.208255	-0.0536901	-0.212041
(2R)-2-[(2R,5S)-5-[(2S)-2-hydroxybutyl]oxolan-2-yl]propanoic acid	0.268202	-0.475944	0.333272	0.045464	-0.266451	0.274419	0.142437	-0.306659	-0.112814	-0.331671	0.071034	-0.227272	-0.130692	0.309603	-0.0812126	-0.194896	-0.268189	-0.242932	0.389091	0.0518433	-0.0160521	-0.387966	0.165812	-0.192651	0.0476297	-0.0147702	0.0109548	-0.0742184	-0.180182	0.0986723	-0.23075	0.11375	-1.40599e-05	-0.146951	-0.0497429	-0.0865494	-0.00907456	-0.123446	0.210485	0.229545	-0.034155	0.0257445	0.186621	0.108528	-0.123254	-0.212855	-0.401985	0.132508	0.0516301
PC (20:2/20:3)	-0.370509	0.587448	-0.449143	-0.145234	0.543756	-0.436638	-0.149957	0.378399	0.243705	0.597511	-0.0575431	0.139588	0.538857	-0.0857746	0.481602	0.51546	0.252166	0.1887	-0.152533	-0.0430614	-0.0890765	0.494222	-0.359085	0.0643826	-0.194544	-0.135258	0.190391	-0.114491	0.366745	-0.0475679	0.144172	-0.130676	-0.23515	0.344463	0.0584672	-0.120463	-0.0785083	0.0433128	-0.29709	-0.422124	0.332166	0.31746	-0.402182	-0.0690247	-0.285803	0.391162	-0.0495948	-0.287707	0.113148
DL-Dipalmitoylphosphatidylcholine	0.019042	-0.310711	0.356578	5.50384e-05	-0.324834	0.108761	0.331631	-0.0598633	0.109692	-0.301548	-0.0727077	-0.127584	-0.329732	-0.0943555	-0.399871	-0.0735151	0.184518	-0.135995	0.307373	-0.0983204	0.0277137	-0.0763193	-0.0586329	-0.0202323	-0.0993756	0.141745	0.158171	0.303092	-0.0168167	0.218249	-0.128889	-0.255467	0.0520342	-0.094996	0.0242322	0.309946	-0.104458	-0.177071	-0.159013	-0.245422	0.159444	-0.255468	-0.146835	-0.0746179	0.0725418	-0.0306432	0.156242	-0.0623857	-0.142311
(+)-ar-Turmerone	0.303054	-0.329039	0.245686	0.0766659	-0.49989	0.211647	0.152997	-0.142797	-0.263047	-0.423307	-0.0135419	-0.168537	-0.315718	0.0791324	-0.279986	-0.156556	-0.199018	-0.162675	0.207276	-0.0296303	0.271055	-0.380489	0.476084	-0.167899	0.139752	-0.227108	-0.187327	0.131483	-0.144366	-0.156538	-0.167693	-0.0393329	0.266911	-0.0341079	0.0752854	0.132589	-0.0220517	-0.16779	0.526762	0.510322	-0.195403	-0.110221	0.489177	0.011266	0.187545	-0.289966	-0.127673	0.114771	-0.207849
Ingenol-3-angelate	0.114034	-0.00187183	-0.0867856	0.132448	0.0550705	0.0877085	-0.246185	-0.337011	0.02064	0.132221	0.201532	0.214328	0.00812952	-0.112597	0.0538736	-0.163362	-0.21581	0.183607	-0.303142	0.223064	-0.087835	-0.042055	0.0986859	0.219698	0.339039	-0.0118028	-0.150157	-0.557644	-0.0193652	0.255528	0.213486	0.465382	0.0545527	-0.203857	-0.131638	-0.55339	0.0672564	0.274795	0.147765	0.443538	-0.107733	0.0952774	0.0646775	0.200567	0.418414	-0.105071	0.220799	0.243376	0.0266282
ACar 18:3	0.241537	-0.36344	0.266039	-0.0154027	-0.209652	0.0879024	-0.315438	-0.11768	0.323955	0.111287	0.561172	0.782633	-0.199287	0.0408554	-0.273258	-0.0477082	-0.210541	0.730227	-0.119213	0.567931	-0.131777	-0.308183	-0.205329	-0.200651	0.516292	-0.328794	-0.166913	-0.0550016	-0.133789	0.515659	0.783318	0.138265	-0.287488	-0.151207	-0.160383	-0.0577097	-0.244262	0.161992	-0.100002	-0.216493	0.212094	-0.172646	0.000991596	0.517288	0.526341	-0.26632	0.0506976	0.307844	-0.367005
PC (14:1e/20:2)	-0.460203	0.0589056	0.179676	0.0715675	0.129759	-0.04091	-0.0473902	0.24614	0.301301	0.213553	-0.21056	-0.057268	0.050776	-0.30955	0.0163044	0.352391	0.0201061	-0.0652285	-0.302005	-0.208187	-0.0569319	0.12448	-0.145417	0.309184	-0.222253	-0.399558	0.0498469	0.0726312	0.628189	0.399079	-0.0558206	-0.307523	0.0145752	0.393924	-0.119261	0.103503	-0.214221	-0.328955	-0.280753	-0.306374	0.506524	-0.022669	-0.482746	-0.249866	0.159874	0.0825339	0.155946	-0.347689	-0.170003
6,8-dihydroxy-3-(10-hydroxyundecyl)-3,4-dihydro-1H-2-benzopyran-1-one	0.270384	-0.402836	0.280257	-0.0321436	-0.606331	0.472164	0.332241	-0.140173	-0.486087	-0.454005	0.0656052	-0.144405	-0.295299	0.212864	-0.173777	-0.333843	-0.231289	-0.178701	0.41348	0.0329897	0.0368188	-0.171673	0.320632	-0.267199	0.19454	-0.0175704	-0.0461758	0.0879335	-0.41185	-0.410821	-0.151917	0.00694446	0.0556027	-0.143325	-0.13099	0.101913	-0.0721747	-0.177392	0.213302	0.298008	-0.498715	-0.04634	0.501821	0.0875262	0.0619067	-0.179131	0.0425146	0.160632	0.0209773
PC (22:6e/2:0)	0.422663	-0.656475	0.419724	0.413887	-0.75377	0.349997	0.0755982	-0.354113	-0.206533	-0.405277	0.216146	-0.0940813	-0.445837	0.324564	-0.390741	-0.328254	-0.306186	-0.191401	0.19768	0.204168	-0.141967	-0.309957	0.114001	-0.245159	0.329794	-0.197375	-0.0328678	0.248579	-0.380767	0.0560901	-0.108731	-0.103509	-0.0798252	-0.379797	-0.312686	0.241168	-0.378256	-0.148953	0.075237	0.112071	-0.232924	-0.266276	0.213689	0.227248	0.435171	-0.401894	-0.0073653	0.418528	-0.324654
4-methoxy-6-(prop-2-en-1-yl)-2H-1,3-benzodioxole	0.0122308	0.0462806	-0.0505082	0.0146898	0.0503531	0.231393	-0.0785083	-0.318115	-0.240393	-0.230718	-0.0824026	-0.0823889	-0.253098	0.352299	-0.266804	-0.340464	0.293407	-0.0343645	0.117117	-0.0614477	0.345433	-0.141662	0.479335	0.128002	0.12425	0.085713	0.0413746	0.157054	-0.270351	-0.0469927	-0.0752006	0.109891	0.344207	-0.191024	0.255644	0.10908	0.378978	0.00354217	0.501891	0.449156	-0.0653248	-0.0550984	0.553588	-0.0782156	0.213668	-0.43682	-0.0333776	0.0215463	0.266053
Xanthosine	-0.0521728	0.276666	-0.300771	-0.234267	0.759182	-0.266576	0.164649	-0.216881	-0.175178	0.0954437	-0.1396	-0.0724495	0.296889	-0.216627	0.313543	-0.207673	0.262282	-0.058771	0.0584296	-0.129084	-0.0952273	0.0719807	-0.0928609	0.270815	-0.216674	0.716756	0.210455	-0.122517	0.0980658	-0.11213	-0.0745193	0.472125	0.240844	-0.0225027	-0.0814727	-0.118072	0.45059	0.166078	-0.160249	0.129085	-0.111589	0.301918	-0.15233	-0.131258	-0.378904	0.187247	-0.133483	-0.165408	0.460087
ACar 18:0	0.197169	-0.136719	0.0545466	0.154296	-0.0357907	-0.148351	-0.427333	-0.220517	0.281196	0.190898	0.594905	0.758545	-0.117666	0.0924804	-0.215182	-0.114607	-0.0323147	0.735324	-0.212784	0.608318	-0.00732387	-0.230183	-0.268461	-0.156297	0.537114	-0.184103	-0.166492	-0.0252145	-0.162748	0.474109	0.76287	0.115245	-0.241805	-0.193971	0.0315432	-0.0425693	-0.144938	0.401473	-0.0826386	-0.335483	0.262186	-0.178141	-0.115252	0.560442	0.526362	-0.2633	0.0392549	0.385298	-0.328741
PC (18:2e/6:0)	0.313324	-0.191227	-0.0251834	0.0758585	-0.185216	0.146105	-0.152004	0.0661333	0.085251	-0.0387773	-0.0646081	-0.0902136	-0.175135	-0.074629	-0.169232	-0.0564904	-0.02444	-0.0959065	-0.126917	-0.0362027	0.200165	-0.264886	0.377505	-0.126896	0.17573	-0.25898	-0.20968	-0.0567932	-0.205058	0.0752883	-0.0873873	0.204345	0.17319	-0.102416	0.0451684	-0.0889993	0.154205	-0.213272	0.511493	0.533329	-0.0672006	-0.141046	0.552672	-0.0665035	0.26153	-0.24755	0.135214	0.178639	-0.146489
Lysope 16:0	-0.130292	-0.369698	0.500971	0.303446	-0.550412	0.412458	0.265788	-0.409199	-0.479337	-0.480448	0.185949	-0.0724543	-0.186556	0.387778	-0.0837041	-0.441215	-0.303474	-0.0990317	0.20717	0.152098	-0.0682285	-0.327499	-0.0315055	0.0309475	0.0323402	-0.0830827	-0.272915	0.0350619	-0.103266	-0.213951	-0.0755219	-0.00408511	-0.0924047	-0.19525	0.0437774	0.0551327	-0.161762	0.150428	-0.144958	-0.192103	-0.216438	-0.0939688	-0.153797	0.200372	-0.0705107	0.0927258	-0.317548	0.170756	0.0798127
Glycyl-L-Proline	-0.169033	0.516875	-0.367491	-0.0346059	0.330648	-0.205998	-0.051179	-0.125228	-0.327721	0.129177	-0.263113	-0.287358	0.273713	0.00944342	0.264802	-0.294602	0.476923	-0.16128	-0.0753002	-0.256142	0.714547	-0.0151699	0.51527	0.00183015	-0.0681428	0.121114	-0.0878133	0.205392	-0.191686	-0.365464	-0.270689	-0.186359	0.552908	0.143129	0.617331	0.181413	0.525585	0.0662232	0.65206	0.251853	0.0727251	0.0722703	0.536995	-0.236824	-0.095152	-0.141815	-0.0794441	-0.0938221	0.346083
PC (6:0/16:2)	0.251327	-0.28913	0.25109	-0.106121	-0.439115	0.283847	0.0920295	0.0311895	-0.0140752	-0.318208	-0.138375	-0.169344	-0.260032	-0.11768	-0.223143	-0.0163213	-0.347466	-0.167352	0.0241448	-0.147056	0.14445	-0.282507	0.457969	-0.0328134	0.00163802	-0.180706	-0.217974	-0.0935961	-0.0384073	-0.039527	-0.167824	-0.0474011	0.206955	0.0428258	0.0126287	-0.0755288	0.0139213	-0.210712	0.473918	0.602572	-0.211846	-0.0934764	0.480631	-0.121362	0.115689	-0.189826	-0.0236546	0.0308985	-0.160039
Orotidine	0.148867	-0.599664	0.477812	-0.196368	-0.203324	0.537103	0.135348	0.0135537	0.153614	-0.422753	0.0316401	-0.0700142	-0.344049	0.150584	-0.266062	-0.106584	-0.371087	-0.0872242	0.305247	0.0126899	-0.160104	-0.378932	0.0154679	0.142794	-0.0698167	-0.0408244	-0.177785	-0.338653	0.17255	0.297419	-0.068596	0.219484	-0.198443	0.168345	-0.102641	-0.342934	0.146815	-0.260862	-0.00625051	0.0936759	0.0580314	-0.0150409	0.106007	0.0390718	-0.202583	-0.176758	-0.250201	-0.0488416	0.0792185
2,4-dihydroxyheptadec-16-en-1-yl acetate	0.321179	-0.168714	-0.00828448	-0.103989	0.140235	-0.255184	0.00740749	0.183764	0.0912915	0.069092	-0.0823783	-0.0497703	0.086012	0.138644	0.00337896	0.0308801	0.197197	-0.117243	0.0940136	-0.0816958	-0.124091	-0.201768	-0.185434	-0.191739	-0.222069	-0.18766	-0.168966	0.694344	0.034595	-0.00342378	-0.0593357	-0.0722896	0.00702439	-0.147908	-0.235953	0.645551	-0.224435	-0.333472	-0.108521	-0.218245	0.344368	-0.276538	0.0894012	-0.0772461	-0.307695	0.0118387	-0.297378	-0.176695	-0.298885
PE (18:2/18:3)	0.386081	-0.0563074	-0.14278	-0.0918765	-0.0523341	-0.223513	-0.0481775	0.203083	0.215687	0.0108213	-0.122398	-0.160494	-0.0789975	0.203672	-0.1973	0.205858	0.276827	-0.156762	0.243031	-0.116928	0.133433	-0.0199145	0.104012	-0.310724	-0.0780264	-0.146493	0.0988241	0.506217	-0.167738	0.0201711	-0.16225	-0.264964	0.0464133	-0.113188	0.0425363	0.445119	-0.119749	-0.280382	0.274966	0.0662671	0.243397	-0.207607	0.35508	-0.0987057	-0.0906792	-0.218478	-0.124476	-0.0665668	-0.273651
PC (17:1/17:2)	0.297182	-0.506304	0.278652	0.345377	-0.0153865	0.00778885	-0.342411	-0.23771	0.264051	0.205884	0.281379	0.0996359	0.167346	0.0257413	0.19389	-0.243703	-0.411852	-0.0180199	-0.374334	0.296041	-0.32296	-0.528685	-0.331743	-0.153421	0.146669	-0.272646	-0.427378	-0.114289	-0.0731341	0.526679	0.0902262	0.328548	-0.223023	-0.33688	-0.313428	-0.128161	-0.22631	0.031973	-0.199029	-0.198315	0.294889	-0.237269	-0.238004	0.276479	0.0507966	-0.00910386	-0.255913	0.360813	-0.260862
D-(+)-Camphor	0.0895466	0.0133957	-0.0102818	0.0901197	-0.369654	-0.00421169	-0.0118226	-0.260105	-0.271711	0.0606729	0.468447	0.661765	-0.0256031	0.327111	-0.0890941	-0.17001	0.173616	0.690542	0.178518	0.482472	0.164049	-0.117268	0.0918898	-0.310035	0.514709	-0.318672	0.0272144	0.261095	-0.393369	-0.260156	0.665409	-0.0708858	-0.10811	-0.141975	0.114193	0.240763	-0.169993	0.17607	0.206988	-0.0906838	-0.140185	0.120221	0.366096	0.441106	0.456762	-0.148121	-0.192433	0.335069	-0.0801156
1,3-Dimethyluracil	-0.0995919	-0.0113778	0.0374111	0.010915	-0.258816	0.0731413	0.186113	0.406895	-0.07695	-0.125163	-0.219758	-0.223479	-0.272783	-0.0653369	-0.290544	0.2382	0.272143	-0.236663	0.161205	-0.235401	0.134235	0.221213	0.0961076	-0.156333	-0.0671347	-0.276075	0.147942	0.483635	0.0364808	-0.16052	-0.226491	-0.335801	0.0916302	0.114876	-0.0453898	0.481853	-0.205289	-0.41642	-0.0455848	-0.128617	0.0486007	-0.241869	0.0550115	-0.236501	0.127497	-0.0397705	0.450807	-0.246353	-0.256889
S-(5-Adenosy)-L-Homocysteine	-0.166848	0.279231	-0.184118	-0.250634	0.229919	-0.0840446	0.191533	0.208105	0.0455245	-0.00488296	-0.44602	-0.220089	-0.183763	-0.210462	-0.287002	0.187601	0.633668	-0.175727	0.140935	-0.434478	0.269485	0.318055	0.316306	0.216384	-0.209213	0.0840367	0.387589	0.462612	0.169704	0.000389635	-0.217148	-0.25258	0.429931	0.149403	0.0513572	0.443774	0.168361	-0.42058	0.1842	0.222782	0.195264	-0.0545514	0.249057	-0.463838	0.165024	-0.175682	0.400696	-0.447747	0.0442359
PC (18:5e/20:4)	-0.00840563	-0.121255	0.129244	0.176569	-0.0382107	0.168035	0.0883258	-0.439342	-0.564574	-0.118498	0.163218	-0.0136373	-0.0280514	-0.0307905	0.0615098	-0.595497	0.072243	-0.0515311	0.0146725	0.142501	0.229826	-0.259733	0.208507	-0.201947	0.330662	0.11671	-0.111308	0.130813	-0.408602	-0.128684	-0.0164812	0.311223	0.365331	-0.329512	0.00178016	0.151171	0.128569	0.144961	0.093336	0.0997466	-0.189796	-0.141997	0.138237	0.161439	0.257548	-0.119538	0.279884	0.175098	0.111345
PC (18:3e/24:4)	0.0821626	0.36318	-0.445605	0.140873	0.171927	-0.607149	-0.242703	0.502226	0.270164	0.190626	0.089241	0.000108391	0.156671	-0.0184679	0.0873499	0.537432	0.0552774	0.0545826	-0.0716499	0.0912248	0.0766109	0.245257	-0.350298	-0.378562	-0.0707056	0.0505019	0.0601824	0.0112285	0.00831563	-0.179457	0.00631235	-0.187585	-0.314044	0.175505	0.312666	-0.00337513	-0.0704274	0.326142	-0.111931	-0.411989	0.00836569	-0.0141063	-0.382186	0.105177	-0.325905	0.236096	-0.0656789	0.101114	-0.279592
Quinoline	0.309931	0.0742823	-0.506834	0.504916	0.15491	-0.33999	-0.229525	-0.114554	-0.124067	0.235732	0.434717	0.178383	0.0241959	0.266592	0.0550816	0.0339144	0.220757	0.14258	0.122077	0.462758	-0.158482	0.262998	-0.340271	-0.30089	0.533026	0.0807117	0.341351	-0.126108	-0.291851	-0.0805193	0.169149	0.34339	-0.350022	-0.166728	-0.193247	-0.177362	-0.0894875	0.250986	-0.177298	-0.223581	-0.171164	0.206655	-0.190256	0.436191	0.308991	-0.162281	0.163255	0.481488	-0.101615
DL-2-(acetylamino)-3-phenylpropanoic acid	-0.0161547	0.115627	-0.165157	-0.0626413	0.613476	-0.235284	-0.148519	0.187094	0.233066	-0.083907	-0.3591	-0.38087	-0.0396677	-0.115081	-0.0703667	0.0577414	0.143709	-0.352782	-0.147051	-0.337716	0.0590171	-0.0690938	-0.0157716	0.156451	-0.416061	0.523759	0.142047	0.161798	0.130168	0.135571	-0.377552	0.0292602	0.176646	0.129226	0.128226	0.146189	0.462868	-0.0359371	-0.00936521	0.012656	0.0694819	-0.0857811	-0.136868	-0.358734	-0.405807	-0.134716	-0.162089	-0.166279	0.165472
PE (14:1e/22:3)	-0.15891	0.311443	-0.199546	0.190016	0.0612869	-0.314334	0.134267	-0.00113501	-0.0770878	-0.0424009	-0.194111	-0.110137	-0.0398591	-0.114355	-0.0797169	0.22398	0.189243	-0.0908395	-0.103328	-0.186294	-0.0225421	0.268075	-0.0360616	0.540912	-0.215391	-0.0997017	-0.021409	0.102	0.621583	-0.121989	-0.111271	-0.156062	0.138154	0.224388	-0.036447	0.100204	-0.155689	-0.0148908	-0.0560244	0.078145	0.125392	0.11044	-0.285763	-0.186781	0.100784	0.138996	-0.0267006	-0.242714	-0.16966
3-[2-(3-Hydroxyphenyl)ethyl]-5-methoxyphenol	0.0642713	-0.51229	0.547619	-0.200311	-0.506421	0.490279	0.368434	-0.0843035	-0.0974875	-0.283837	0.064905	0.206111	-0.204304	-0.232938	-0.167714	-0.157776	-0.26841	0.17435	0.164575	0.0529851	-0.0519419	-0.456313	0.224086	0.0111321	0.0895088	-0.327146	-0.282421	-0.148797	0.0579286	0.0637158	0.206161	0.289668	0.0859872	-0.0176469	-0.165507	-0.116459	-0.0661961	-0.301253	0.124388	0.338985	-0.106732	-0.00944633	0.268777	0.042123	0.157876	0.12506	-0.0302272	-0.0151715	-0.0741314
PC (20:5e/2:0)	0.54289	-0.478772	0.0305301	0.680203	-0.411121	-0.0903178	-0.374563	-0.110953	0.211247	-0.0671052	0.517859	0.03517	-0.165435	0.42069	-0.114002	0.0317598	-0.483168	-0.0459463	-0.0288925	0.524127	-0.332549	-0.213593	-0.451078	-0.373555	0.39224	-0.204659	-0.181932	-0.299163	-0.239317	0.246096	0.025421	0.162119	-0.631533	-0.279759	-0.159781	-0.339558	-0.374264	0.302965	-0.17381	-0.301036	-0.0633581	-0.147313	-0.328311	0.547203	0.126566	-0.1563	-0.219337	0.686396	-0.448437
Boldione	0.131128	-0.0634372	-0.031995	-0.384209	0.0651786	0.327342	-0.226666	0.26291	0.499977	0.163868	-0.182951	-0.164946	-0.0340367	-0.00475919	-0.025779	0.168597	-0.165091	-0.206294	-0.0941358	-0.18324	-0.233481	0.277876	0.00563306	0.0795265	-0.111911	0.0570928	-0.00894165	-0.407585	-0.104515	0.380706	-0.167619	0.0627007	-0.164033	-0.169631	-0.160144	-0.425593	0.0207434	-0.138759	-0.0205994	0.226461	0.110208	-0.180098	0.212673	-0.166749	-0.11778	-0.0553004	0.437432	-0.153383	0.0924282
Phosphocholine	0.197945	-0.0382995	-0.0844849	0.169298	-0.0844036	-0.253486	-0.424999	0.397983	0.439725	-0.00525442	0.228868	0.272031	-0.311679	-0.191891	-0.33938	0.341183	-0.293676	0.291357	-0.301497	0.234485	0.0650625	0.0258976	-0.170153	-0.174404	0.237726	-0.0114643	0.0177363	-0.0903171	0.0721244	0.228126	0.277798	-0.335907	-0.297778	0.389504	0.103676	-0.0677486	-0.0419649	0.198832	-0.0224482	-0.278713	-0.0516778	-0.12902	-0.184704	0.204066	0.309611	-0.363286	0.162883	0.294439	-0.466039
(-)-Epigallocatechin	-0.215121	0.440955	-0.435189	-0.174797	0.569824	-0.214776	-0.208395	0.360887	0.367174	0.609915	-0.375195	-0.281113	0.314018	-0.304707	0.29768	0.293814	0.401284	-0.271085	-0.275288	-0.364826	0.0624102	0.597584	-0.0403718	0.320488	-0.179164	-0.120739	0.189547	-0.0615597	0.404784	0.286663	-0.280553	-0.292865	0.106037	0.389707	-0.109888	-0.0792968	0.0472106	-0.392898	-0.0569077	-0.117812	0.56789	0.071418	-0.0121268	-0.376018	0.0641928	-0.0787128	0.532325	-0.417818	0.0663467
Nervonic ceramide	-0.271425	0.555565	-0.327833	-0.18799	0.552833	-0.310197	-0.155898	0.0438785	0.0800303	0.200026	-0.353508	-0.178328	0.243458	0.0788408	0.164623	0.00693378	0.338077	-0.124872	-0.226678	-0.34002	0.101709	0.32878	0.0028397	0.317557	-0.426108	0.395745	0.148768	0.358708	0.102018	-0.114333	-0.17447	-0.415611	0.200507	0.0689588	0.202741	0.346017	0.214507	0.112503	-0.0318539	-0.148849	0.158776	-0.015135	-0.0235658	-0.347014	-0.306568	-0.0217419	-0.135781	-0.30635	0.283094
19(R)-HETE	-0.119656	0.230904	-0.276317	-0.280491	0.233618	0.116475	0.0861407	0.114251	0.188279	0.148835	-0.132096	-0.148866	-0.0329646	-0.0109122	-0.046784	0.2897	0.325998	-0.113352	0.346716	-0.133899	-0.0394568	0.599653	0.0352954	0.04715	0.0474782	0.281541	0.61549	-0.387066	-0.0652805	0.165836	-0.148077	0.0905215	-0.0580343	0.0155033	-0.0266501	-0.402784	0.144059	-0.0891968	-0.053781	0.144586	0.0238627	0.226956	0.0089186	-0.120903	0.0502709	-0.0422617	0.542865	-0.20715	0.312679
L-(+)-Citrulline	-0.0940138	-0.320186	0.512238	-0.283961	-0.264041	0.426458	0.388886	-0.358343	-0.102791	-0.172831	-0.18711	-0.0673368	0.0345234	-0.174056	0.0480717	-0.400123	-0.070499	-0.0322517	0.160468	-0.198457	0.191149	-0.428898	0.440364	0.210562	-0.131543	-0.0652403	-0.125435	-0.0188827	0.0476221	0.100513	-0.0615332	-0.111566	0.350735	0.117488	0.0645159	0.0108516	0.185844	-0.366351	0.357394	0.340924	0.106373	0.123777	0.464467	-0.187164	0.0377321	-0.0666203	-0.3132	-0.119642	0.280742
Isotretinoin	-0.236458	-0.0374549	0.270374	-0.0329769	-0.510788	0.500049	0.190024	-0.083622	-0.111654	-0.280735	-0.362022	-0.376203	-0.347366	0.0754269	-0.321207	0.0328444	-0.0526721	-0.372131	0.0709725	-0.378479	0.108704	0.258903	0.500825	0.330776	-0.100773	-0.238958	0.13957	0.0518062	0.103496	0.0140361	-0.378058	-0.451687	0.276663	0.00553945	-0.0438516	0.0723813	-0.184261	-0.339756	0.264523	0.456188	-0.0545864	-0.106142	0.301642	-0.351943	0.372621	-0.240351	0.379491	-0.262259	0.0282765
5-Hydroxyindole-3-acetic acid	-0.41116	0.0449901	0.362397	0.154776	-0.284019	0.15377	0.11746	-0.104121	-0.255695	-0.353387	-0.369003	-0.395601	-0.192724	0.0471249	-0.216837	-0.0310387	-0.0798579	-0.385197	-0.137919	-0.382661	0.205623	-0.0901245	0.356886	0.0141454	-0.320827	-0.0100127	0.106623	0.5673	-0.0591171	-0.149527	-0.395917	-0.516037	0.413039	-0.144334	0.162766	0.613955	-0.124304	-0.0589297	0.0980771	0.112702	-0.144942	-0.284342	-0.0939035	-0.377757	0.0448948	-0.0537295	-0.0309189	-0.194562	-0.00959765
PC (14:0e/20:1)	-0.246976	0.455693	-0.379544	-0.0491082	0.416727	-0.459898	0.0473201	0.0107934	-0.179004	0.527936	0.278623	0.464329	0.522227	-0.105117	0.465759	0.193378	0.412688	0.500544	0.0889433	0.28625	0.0524547	0.23582	-0.272226	-0.259919	0.221113	-0.121687	0.247802	0.0350626	0.0199093	-0.20501	0.467208	0.209766	-0.0665328	0.0855098	0.033937	0.0359603	-0.08182	0.183516	-0.215861	-0.362232	0.149342	0.380308	-0.284349	0.254224	0.00736711	0.37663	-0.017132	-0.050944	0.0942231
Ergosterol	0.354087	-0.557435	0.206501	0.393514	-0.175344	0.0145135	-0.149553	0.0842468	0.218437	-0.0584244	0.194099	-0.0315187	-0.134495	-0.0767296	-0.0713644	0.0363665	-0.370559	-0.0929734	-0.109992	0.209775	-0.167183	-0.46052	-0.180734	-0.153847	0.169601	-0.336607	-0.238566	-0.182176	0.14964	0.315121	-0.0363702	0.238602	-0.264076	0.15324	-0.234019	-0.194253	-0.0969669	-0.224858	-0.0220233	-0.0684727	0.10729	-0.0368665	-0.132663	0.185269	0.111668	-0.155051	-0.231768	0.337505	-0.360367
PC (19:0/19:0)	-0.16656	0.0929354	-0.00354726	-0.00673122	0.317904	-0.259445	0.0641769	0.104772	0.0214949	-0.126456	-0.0023039	0.0803866	-0.0731664	0.0337938	-0.154309	0.0607	0.265415	0.0815423	0.0708795	-0.00460161	-0.0782953	-0.0227441	-0.356747	0.0094089	-0.238242	0.313307	0.0992909	0.391278	0.106305	-0.00334537	0.0809323	0.0494006	-0.0460113	-0.0714985	0.0813277	0.384606	0.0651922	0.17178	-0.422468	-0.478789	0.0990633	-0.159189	-0.493864	-0.0232068	-0.3111	0.194228	-0.120586	-0.156734	-0.0130503
N-[4-(Aminosulfonyl)phenyl]-5-(morpholinosulfonyl)-2-furamide	-0.115731	-0.508716	0.751161	-0.207559	-0.360431	0.424677	0.387153	-0.188317	-0.11934	-0.403361	-0.11766	0.0461119	-0.136559	-0.241009	-0.116972	-0.370765	-0.373596	-0.00443628	-0.0274778	-0.136354	-0.165891	-0.568304	0.0882355	0.0792754	-0.287898	0.119873	-0.246526	0.250383	-0.0184611	0.020197	0.04205	-0.0198413	0.171809	-0.136182	-0.161124	0.317744	-0.0233354	-0.173219	-0.166396	0.0260018	-0.195513	-0.191044	-0.00768213	-0.148199	-0.16221	0.186983	-0.30145	-0.0648862	0.0649896
(3-Methoxy-4-hydroxyphenyl)ethylene glycol sulfate	0.307411	-0.362199	0.129079	0.400507	-0.437347	0.181905	-0.261452	-0.204153	-0.203505	-0.306792	0.618615	0.459385	-0.330249	0.442387	-0.231557	-0.132684	-0.544103	0.449071	0.0534596	0.626079	-0.0783686	-0.348056	-0.0463868	-0.23762	0.580331	-0.207252	-0.167653	-0.319054	-0.226129	-0.112299	0.459736	0.219832	-0.423451	0.0392687	-0.0133243	-0.321534	-0.0791448	0.366476	0.115469	0.0116959	-0.441274	0.135583	0.0731221	0.610969	0.338477	-0.364633	-0.36158	0.617657	-0.188249
LPE 17:0	0.507343	-0.38002	0.130502	0.275282	-0.407595	-0.0417589	-0.237817	0.246949	0.297974	-0.318732	-0.0768742	-0.36462	-0.364464	-0.0139608	-0.370098	0.104246	-0.365381	-0.390271	-0.169129	-0.0796587	0.126836	-0.376154	0.129142	-0.254178	-0.0485191	-0.169397	-0.39714	0.0780284	-0.103526	0.156434	-0.364041	-0.138625	-0.0136657	-0.0865135	0.136497	0.0573839	-0.0686936	-0.0516481	0.340836	0.217211	-0.0202983	-0.471937	0.165304	-0.04455	-0.0280601	-0.240304	-0.038817	0.250875	-0.532075
Guggulsterone	0.240156	-0.11123	0.0218578	-0.122348	-0.179839	0.170911	0.0143064	-0.0208134	-0.102885	-0.125326	-0.0958627	-0.0382063	-0.146972	-0.145425	-0.117349	-0.0312941	-0.145459	-0.0358532	-0.0235428	-0.0866956	0.181924	-0.190321	0.500377	-0.0167363	0.139821	-0.186574	-0.123285	-0.0914923	-0.0643122	-0.0733085	-0.0371452	0.155758	0.303438	0.0153001	-0.0499333	-0.0877537	0.100152	-0.197337	0.528674	0.716474	-0.200756	0.0276386	0.570156	-0.0906124	0.254106	-0.232484	0.0814259	0.0181872	-0.0832733
PC (2:0/16:2)	0.0472636	-0.212485	0.202454	0.348908	-0.491777	0.235668	0.0173444	-0.248252	-0.136515	-0.373861	-0.0159574	-0.177861	-0.511975	0.313729	-0.553379	-0.123834	0.169815	-0.167969	0.190715	-0.0118217	0.266005	-0.0915691	0.359058	-0.0878972	0.216879	-0.160213	0.194038	0.345184	-0.274715	0.0866562	-0.177195	-0.25329	0.189696	-0.240561	0.145693	0.317756	-0.0791486	-0.105926	0.328007	0.203953	-0.0413392	-0.250105	0.248779	-0.0164378	0.512372	-0.46137	0.168633	0.160765	-0.152741
Porphobilinogen	-0.298069	0.55519	-0.338477	-0.078149	0.136141	-0.148877	-0.0796207	0.166013	-0.310538	0.14509	-0.139939	0.0765421	0.116413	0.160776	0.0653596	0.203117	0.372612	0.136623	-0.0703479	-0.126681	0.344806	0.247973	0.319287	-0.013054	-0.00218908	-0.356462	0.00594866	0.364027	0.0278545	-0.429259	0.0837137	-0.132879	0.287182	0.0540002	0.240394	0.343642	-0.00760718	-0.00779038	0.31022	0.211021	0.00571054	0.0407337	0.278644	-0.151478	0.0926732	0.0370724	0.089016	-0.287215	0.0274049
Nicotinamide	-0.347568	0.345611	-0.151616	-0.131108	-0.00835268	0.0392244	0.0397106	0.465751	0.0725598	0.0407906	-0.376004	-0.267908	-0.142751	-0.033162	-0.191369	0.374775	0.372351	-0.238652	0.00191395	-0.383155	0.168036	0.508091	0.119819	0.0986774	-0.231549	-0.190818	0.194355	0.312922	0.162845	-0.103743	-0.26489	-0.427029	0.118389	0.155887	0.117866	0.305432	-0.0925969	-0.28295	-0.0301276	-0.0830028	0.160072	-0.189365	0.00724629	-0.387605	0.032939	0.0342798	0.538114	-0.438728	-0.0565123
Gamma-Glu-Leu	-0.368587	-0.109064	0.543418	-0.185277	-0.190677	0.241177	0.1547	-0.185739	0.0738626	-0.312406	-0.172363	0.151721	-0.176462	-0.0948851	-0.24271	-0.133456	-0.170638	0.205233	-0.141122	-0.175721	0.118394	-0.353138	0.222637	0.443795	-0.313247	-0.0305213	-0.171604	0.190652	0.344999	0.160342	0.162098	-0.380212	0.224144	0.215391	0.205643	0.23692	0.0837602	-0.0479661	0.0920235	0.0349955	0.125089	-0.0519965	-0.0041808	-0.202218	0.0344582	-0.0470073	-0.42767	-0.215502	0.0886945
PC (20:3/22:6)	-0.32954	0.117005	0.0587662	0.229206	0.0787952	-0.184542	-0.0900182	-0.116842	-0.0947185	0.352182	0.195368	0.32331	0.386159	0.234547	0.329919	-0.00423647	0.120281	0.294323	-0.166653	0.213017	-0.176397	-0.0384684	-0.358923	-0.148155	-0.00106976	-0.322961	0.022099	0.409624	-0.0225867	-0.056786	0.319006	-0.143565	-0.204279	-0.137351	-0.0917541	0.405898	-0.338781	0.065352	-0.388243	-0.606058	0.223128	0.050138	-0.378939	0.156947	-0.0195807	0.27111	-0.365954	0.045913	0.00530602
PC (18:5e/2:0)	0.275044	-0.474156	0.367622	0.0135196	-0.519525	0.267388	0.0248247	0.153158	0.169299	-0.176701	-0.0454184	-0.0934391	-0.173151	0.0420271	-0.126922	0.121492	-0.543283	-0.172116	-0.0529846	-0.0549103	-0.303772	-0.196754	0.0108342	0.0201822	-0.0973082	-0.414441	-0.270173	0.0210901	0.176032	0.0866746	-0.103959	-0.218957	-0.204217	0.0678162	-0.369704	0.0345919	-0.409991	-0.355713	-0.00703357	0.134327	-0.0252488	-0.135581	0.127346	-0.0380066	0.0158203	-0.0798798	-0.195154	0.0280641	-0.353456
Tetrahydroaldosterone	0.407276	-0.310608	0.0852207	0.0126116	-0.250045	0.112282	0.0447984	-0.104094	-0.0223087	-0.156587	0.0583088	0.0292373	-0.187965	-0.181807	-0.162366	-0.0967951	-0.177465	0.0175726	0.044723	0.0690456	0.111755	-0.3412	0.343972	-0.0902574	0.240869	-0.140624	-0.148579	-0.174436	-0.0896187	0.0547066	0.0290664	0.278569	0.176866	-0.0206031	-0.0860148	-0.177579	0.0869558	-0.156466	0.450301	0.5905	-0.166284	0.0302662	0.454896	0.064879	0.285537	-0.22565	-0.00216479	0.206798	-0.175447
ACar 20:2	0.375698	-0.37048	0.118092	0.253535	-0.168581	-0.0815242	-0.350647	-0.0535664	0.235044	0.107265	0.40307	0.398541	-0.231655	0.212514	-0.315292	-0.0860475	0.0411986	0.303512	-0.0921871	0.413789	-0.119926	-0.232191	-0.263799	-0.357179	0.414212	-0.318203	-0.0912878	0.42452	-0.283476	0.415288	0.390526	-0.00706497	-0.219509	-0.348976	-0.239745	0.382935	-0.351165	-0.00676564	-0.153803	-0.365823	0.290191	-0.414757	-0.0174543	0.374057	0.449594	-0.357805	0.132498	0.312471	-0.504466
Daidzein	-0.401203	0.283505	0.000318314	0.0126037	0.198394	-0.170932	0.114646	0.132538	-0.239891	0.220989	-0.364799	-0.290246	0.4746	-0.320211	0.464143	0.0259511	0.155257	-0.252959	-0.290997	-0.353318	0.318937	-0.225202	0.257304	-0.186252	-0.343202	-0.237028	-0.173093	0.335256	0.0130284	-0.308988	-0.284061	-0.019716	0.448331	0.0294357	0.245953	0.361438	0.118896	-0.181991	0.206595	0.108733	0.0655424	-0.00153293	0.0213379	-0.379694	-0.300529	0.436336	-0.177149	-0.235017	0.13241
2-morpholino-1-phenyl-1-ethanol	0.165331	0.0927863	-0.199072	-0.197315	0.258373	-0.285382	0.0887035	0.0119949	0.18332	0.288141	-0.183201	-0.048402	0.177299	0.00868154	0.0406476	0.137338	0.493695	-0.0689059	0.198026	-0.164764	-0.0652662	0.179236	-0.0187602	-0.0942821	-0.129835	0.0349268	0.377573	0.510894	-0.0629596	0.110242	-0.0563389	-0.155739	0.131142	-0.167481	-0.21865	0.466654	-0.130971	-0.349361	-0.00216545	-0.00194235	0.3229	0.00735546	0.168623	-0.182926	-0.012079	-0.0585841	-0.0264159	-0.20152	-0.03376
Acetophenone	-0.349737	0.216624	0.0847734	0.107358	-0.298304	0.4068	0.152558	-0.371337	-0.491961	-0.308317	-0.265155	-0.305196	-0.258263	0.00565727	-0.183637	-0.383654	0.098741	-0.249272	-0.0782761	-0.274888	0.418384	0.145183	0.652168	0.378527	0.0608299	0.0889271	0.00947099	-0.0488745	-0.112978	-0.250704	-0.298498	-0.204343	0.536169	-0.0506809	0.279841	-0.0189168	0.22896	0.0578657	0.449515	0.542739	-0.310069	-0.0302629	0.393538	-0.256065	0.429177	-0.238659	0.408274	-0.0695337	0.298485
3-phenyl-5-(1,2,3-thiadiazol-4-yl)-1,2,4-oxadiazole	0.00181943	-0.173647	0.243207	-0.0969579	-0.235209	0.222811	0.0472821	-0.144542	0.023682	-0.15389	0.125769	0.353933	-0.152562	-0.123097	-0.164271	-0.0519953	-0.174339	0.415811	-0.00718946	0.143256	0.211263	-0.401371	0.351234	0.144427	0.191787	-0.275712	-0.186998	-0.285744	0.144811	0.100164	0.366397	0.153008	0.111044	0.242879	0.17272	-0.272489	0.192941	-0.0469798	0.441099	0.424125	-0.0438211	0.20717	0.356025	0.102382	0.30584	-0.146707	-0.273903	0.10156	0.0140921
PC (19:2/18:3)	0.295545	-0.351707	0.321927	-0.0968554	-0.31792	0.00770767	0.247424	-0.0581822	-0.0406812	-0.223479	-0.169193	-0.198083	-0.111138	0.0323991	-0.197327	-0.146389	0.10785	-0.239159	0.21785	-0.186547	0.110685	-0.395755	0.194448	-0.247065	-0.186549	-0.181661	-0.16877	0.694717	-0.152995	-0.000988066	-0.203688	-0.215781	0.28598	-0.280784	-0.0584986	0.676051	-0.210679	-0.365543	0.202224	0.105277	0.19852	-0.37173	0.31674	-0.153248	-0.102513	-0.0527154	-0.214555	-0.117466	-0.288107
PC (20:4/20:4)	0.338771	0.0948036	-0.420045	-0.0222784	0.266547	-0.122224	-0.518715	0.343229	0.363655	0.40034	0.0168522	-0.119603	0.152198	0.260525	0.150462	0.16956	0.0791553	-0.144553	-0.153617	0.0336303	0.00320575	0.186334	-0.097199	-0.225311	0.102203	-0.242788	-0.150855	-0.0795543	-0.177827	0.178383	-0.120327	0.018476	-0.231405	-0.0538519	-0.0128125	-0.154463	0.00257836	-0.100194	0.151194	-0.0480046	0.310903	-0.173031	0.297717	0.0420461	-0.106878	-0.227416	0.173821	0.05186	-0.128079
PC (16:1e/18:1)	-0.173827	0.187504	-0.213134	-0.228903	0.224491	0.029616	0.35718	0.0289397	-0.288103	-0.0569539	0.114235	0.265852	-0.0389619	0.131689	-0.00164175	0.0647288	0.293717	0.282539	0.487435	0.111229	-0.271463	0.469273	-0.253784	0.168272	0.0522375	0.402605	0.547601	-0.0540592	0.09123	-0.367126	0.260198	0.140385	-0.247628	0.218484	-0.235433	-0.048769	0.0801895	0.00510138	-0.439822	-0.248976	-0.317587	0.461597	-0.169801	0.0933823	-0.0950811	0.104155	0.0461749	-0.138023	0.361246
Cuminaldehyde	-0.521375	0.322678	0.121195	0.139216	-0.283659	0.330623	0.0694122	-0.268366	-0.451525	-0.255258	-0.338231	-0.368965	-0.156008	0.113807	-0.123002	-0.227087	0.101578	-0.301826	-0.159596	-0.349109	0.472846	0.125067	0.630269	0.270484	-0.0893882	-0.0922181	-0.0314028	0.149089	-0.0886036	-0.265216	-0.359918	-0.368861	0.543336	-0.0903548	0.40462	0.1768	0.113975	0.0720413	0.432003	0.412386	-0.170974	-0.132189	0.262887	-0.330464	0.283774	-0.12383	0.272226	-0.182503	0.244979
PC (16:0/18:1)	-0.408483	0.617436	-0.417263	-0.101047	0.724991	-0.459521	-0.0342527	0.0544505	-0.0858478	0.355571	-0.0355787	0.137538	0.464779	-0.273145	0.436329	0.130811	0.336577	0.219054	-0.178104	-0.0240793	0.17917	0.174981	-0.149134	0.1745	-0.13567	0.20363	0.0328083	-0.189218	0.309044	-0.135417	0.149161	0.272974	0.155207	0.246408	0.289085	-0.178677	0.329443	0.312571	-0.102545	-0.152321	0.153806	0.31348	-0.368964	-0.0455167	-0.271367	0.396858	-0.0640718	-0.228228	0.285897
PC (14:0e/2:0)	-0.140984	0.292062	-0.0369399	-0.797148	0.308982	-0.0870168	0.319172	0.328356	0.158335	-0.121569	-0.41271	0.0444268	0.00601906	-0.432101	-0.112481	0.2615	0.284123	0.177074	0.224982	-0.415463	0.39182	-0.0410538	0.440479	0.126647	-0.407218	0.287155	0.153442	0.116476	0.224772	-0.145511	0.0619281	-0.124372	0.437724	0.421266	0.373442	0.139585	0.489436	-0.214033	0.420318	0.432657	0.0201134	0.17847	0.426473	-0.421349	-0.342496	0.084313	-0.151055	-0.520168	0.235609
Citral	0.229102	-0.325488	0.295187	0.016201	-0.478781	0.306558	0.181898	-0.148364	-0.245379	-0.438655	-0.132929	-0.237977	-0.325534	0.0483735	-0.291055	-0.16529	-0.203425	-0.245219	0.152538	-0.143917	0.202318	-0.350778	0.521074	-0.0638776	0.0325257	-0.184873	-0.167417	0.145878	-0.128513	-0.129477	-0.238999	-0.0170197	0.327617	-0.110435	0.0103497	0.151082	-0.00947964	-0.228306	0.494384	0.608536	-0.223208	-0.143551	0.499533	-0.113474	0.163212	-0.247133	-0.0749548	0.0290204	-0.134617
L(+)-Ornithine	0.257912	-0.0198308	-0.123156	0.00832372	-0.0707987	-0.183261	-0.215969	-0.120629	-0.0563228	0.18201	0.730327	0.987045	-0.0089339	0.0656987	-0.0440058	-0.0802743	-0.0679103	0.975116	-0.0163354	0.741065	-0.0743104	-0.122471	-0.267379	-0.283285	0.659985	-0.134931	-0.107501	-0.109825	-0.228362	-0.0453861	0.988861	0.295885	-0.336881	-0.0475639	-0.071855	-0.109944	-0.134156	0.445943	-0.102632	-0.246962	-0.161432	0.13884	0.0337455	0.691257	0.429283	-0.0814556	-0.0438446	0.431345	-0.232013
PC (19:2/19:2)	0.113729	0.183034	-0.320875	-0.089172	0.268092	-0.36043	-0.287879	0.324801	0.141955	0.392931	0.427365	0.655787	0.266065	0.00104077	0.255721	0.270043	-0.0837285	0.666423	-0.124513	0.442353	-0.127602	0.0648327	-0.394066	-0.216202	0.26859	-0.211861	-0.0918229	-0.125577	0.112103	-0.12225	0.658636	0.0968058	-0.445405	0.353716	-0.0670825	-0.130571	-0.0850452	0.192456	-0.197899	-0.415895	0.0299154	0.263831	-0.114021	0.398042	-0.0355093	0.0769909	-0.22399	0.154922	-0.167608
ACar 16:1	0.350208	-0.312255	0.0854203	0.154332	-0.217733	-0.144595	-0.239115	-0.0843502	0.137437	0.135771	0.731592	0.877962	-0.0961468	0.140919	-0.155576	0.0356693	-0.161134	0.828993	0.0286174	0.74263	-0.18444	-0.296367	-0.369138	-0.370007	0.614666	-0.386187	-0.133932	-0.0107312	-0.132761	0.225463	0.875931	0.253596	-0.44641	-0.0939246	-0.191917	-0.0260461	-0.335418	0.239252	-0.172097	-0.350061	0.0793684	0.00778801	-0.106903	0.692976	0.436284	-0.126166	-0.166326	0.443242	-0.44514
PC (16:2e/2:0)	0.174309	-0.492816	0.438619	0.289502	-0.790585	0.519346	-0.0479732	-0.121159	-0.159139	-0.479875	0.14692	-0.0980431	-0.488205	0.402538	-0.429975	-0.0647914	-0.471137	-0.157174	0.105684	0.134871	-0.062522	-0.264655	0.240824	-0.297187	0.238628	-0.344452	-0.122894	0.0303583	-0.385427	-0.0106957	-0.10422	-0.0186936	-0.107635	-0.390909	-0.0750637	0.0323247	-0.314707	-0.00143978	0.175801	0.287007	-0.35247	-0.311884	0.191075	0.15348	0.287085	-0.239262	0.0568656	0.284471	-0.251545
PC (17:0/18:1)	-0.30379	0.317589	-0.153855	-0.263412	0.564384	-0.176035	0.175552	-0.0617358	-0.039901	0.0811679	-0.124979	0.0493332	0.167461	-0.23484	0.137545	-0.146848	0.390498	0.112542	0.0680008	-0.12526	0.0932066	0.154883	-0.115687	0.242817	-0.205972	0.609801	0.263963	0.0103579	0.102765	-0.0385576	0.0563212	0.0533387	0.159009	0.180673	0.176157	0.0275118	0.435498	0.137699	-0.212642	-0.246749	0.0422605	0.194964	-0.203204	-0.140102	-0.248836	0.13746	0.0107065	-0.207576	0.42798
SM (d14:3/28:2)	0.25895	0.198361	-0.392989	0.053738	0.0913493	-0.462556	-0.2013	0.294312	0.283335	0.19852	0.111299	0.208048	-0.0629644	0.222062	-0.194361	0.431292	0.30062	0.198005	0.0907648	0.12935	-0.130583	0.355687	-0.296947	-0.136613	0.0634853	-0.111996	0.245409	0.387747	0.0510553	-0.00150474	0.20284	-0.272789	-0.28482	0.00517234	-0.112482	0.333525	-0.310526	-0.00476541	-0.144787	-0.295531	0.18753	-0.0574015	-0.0895974	0.109435	0.085584	-0.122979	0.00907869	0.00321373	-0.372967
PC (18:3/18:4)	0.31178	-0.450815	0.335205	0.0415876	-0.446283	0.372531	-0.0321642	-0.264538	0.0633678	-0.229885	0.0398099	-0.0974422	-0.262661	0.109178	-0.224158	-0.174246	-0.373874	-0.137445	0.0516568	0.0322226	-0.0228668	-0.274975	0.307367	0.0142302	0.172985	-0.198174	-0.133906	-0.169204	-0.11439	0.267769	-0.10147	-0.0190954	0.0638435	-0.148463	-0.154235	-0.169071	-0.12186	-0.161874	0.330127	0.451943	-0.0283323	-0.10941	0.372747	0.0611675	0.30321	-0.366539	-0.030685	0.168432	-0.137466
Adenine	0.239829	0.142087	-0.257446	-0.0136079	0.228573	-0.411076	0.0647763	-0.170288	-0.152691	0.113871	0.00620851	0.0724796	0.141667	0.155937	0.0468908	-0.162019	0.437408	0.0709678	0.174948	0.0189545	0.0581684	0.0208596	-0.032814	-0.141899	-0.0106963	0.232043	0.223568	0.650267	-0.210147	-0.222969	0.0663188	-0.181443	0.14639	-0.149981	-0.0631923	0.612829	-0.0178437	-0.0361035	0.0397741	-0.132536	0.0545047	0.0208534	0.195484	0.0121817	-0.0389482	-0.146781	-0.274984	0.0323543	-0.015874
Celastrol	-0.151602	-0.409843	0.671236	-0.0872548	-0.520975	0.376329	0.421426	-0.145087	-0.0758117	-0.388939	-0.203718	-0.202822	-0.143005	-0.33876	-0.128081	-0.166825	-0.295645	-0.185329	0.0682375	-0.231436	0.179319	-0.505854	0.34992	0.0235335	-0.211649	-0.142451	-0.223642	0.00599602	0.0944972	0.0805266	-0.197405	-0.128106	0.315984	0.055427	0.133879	0.0676584	0.00457042	-0.249137	0.219149	0.261694	-0.0275378	-0.108963	0.0877091	-0.206028	-0.0148378	0.149701	-0.161493	-0.0924817	-0.0204537
PC (18:3e/22:5)	0.363684	0.151016	-0.480566	-0.0714418	0.272591	-0.389757	-0.153394	0.312294	-0.0766438	0.103055	0.299209	0.331761	-0.0243849	0.359693	-0.0411222	0.258411	0.165085	0.303177	0.285358	0.303354	-0.219575	0.313151	-0.364598	-0.325227	0.209248	0.110331	0.281884	0.327712	-0.123557	-0.349395	0.322066	0.013326	-0.389993	0.0918245	-0.259213	0.284945	-0.159322	0.0827964	-0.263457	-0.346471	-0.170244	0.126184	-0.00739778	0.297514	-0.127408	-0.174046	-0.100851	0.0746876	-0.188855
Methionine sulfoxide	-0.0472069	0.265115	-0.343022	-0.138531	0.71512	-0.323198	-0.219655	0.120904	0.374985	0.336233	-0.134189	-0.0786958	0.193379	-0.133784	0.129457	0.0970615	0.357929	-0.0527285	-0.102443	-0.114005	-0.00267774	0.229253	-0.222336	0.113582	-0.153122	0.420812	0.29036	-0.0321858	0.0836804	0.322773	-0.0754872	0.0312673	-0.00399084	0.112083	0.0535772	-0.0593675	0.321984	0.0231137	-0.162902	-0.245325	0.32935	0.0554613	-0.194078	-0.138669	-0.184636	-0.0850017	0.0999693	-0.128927	0.201869
Taurocholic acid	0.204726	-0.524549	0.540959	-0.220451	-0.333579	0.361179	0.118106	-0.0742981	0.241204	-0.290332	-0.187535	-0.163368	-0.291605	-0.158924	-0.332844	-0.0814832	-0.223033	-0.197288	0.0625525	-0.20201	0.0732201	-0.476631	0.346857	0.018548	-0.118618	-0.2279	-0.221764	0.0964293	0.0505545	0.443614	-0.163033	-0.0186567	0.280345	-0.129534	-0.0784568	0.103518	-0.0454471	-0.388775	0.310091	0.431271	0.242943	-0.316448	0.323771	-0.182148	0.102237	-0.206169	-0.0203403	-0.145002	-0.205592
PC (18:4e/22:6)	0.0840152	0.341615	-0.467515	0.012273	0.423514	-0.496311	-0.3528	0.484675	0.15117	0.303289	0.059871	0.164926	0.182745	0.0864787	0.132749	0.371483	0.178355	0.17827	-0.199651	0.0776895	0.0493424	0.124486	-0.257629	-0.108774	-0.0434569	-0.274308	-0.192695	0.227158	0.241514	-0.140208	0.168308	-0.00966878	-0.173395	0.255001	0.0734336	0.182774	-0.0383119	0.0392569	-0.0483913	-0.287674	0.252455	-0.0342205	-0.0953402	0.0534957	-0.218434	0.0506911	-0.127507	-0.115356	-0.27177
Estriol	-0.0178197	0.162385	-0.155839	-0.243747	0.211683	-0.179439	-0.216709	0.52747	0.460449	0.492564	-0.271835	-0.140728	0.183528	-0.358761	0.124886	0.317589	0.195035	-0.170717	-0.293103	-0.279899	0.0674468	0.326288	-0.0657971	-0.0721325	-0.144322	-0.302949	-0.0122269	0.267901	0.178517	0.300872	-0.142339	-0.46744	0.0566131	0.235196	-0.132736	0.267033	-0.199703	-0.433542	-0.0723223	-0.254404	0.54147	-0.266857	0.0608012	-0.282551	0.062191	-0.0675793	0.529023	-0.33187	-0.28671
4-(allyloxy)-1,2-dihydroquinolin-2-one	-0.261753	-0.152299	0.505387	-0.244609	-0.340769	0.446603	0.295425	-0.186892	-0.0796614	-0.548388	-0.167779	0.0584756	-0.421994	-0.193631	-0.425896	-0.272512	-0.144329	0.12572	0.0146685	-0.186277	0.247892	-0.29784	0.394241	0.483216	-0.1751	0.148591	-0.239288	-0.0952043	0.222505	0.0467474	0.0719637	-0.136394	0.318628	0.174373	0.309172	-0.0465192	0.292429	0.0274025	0.24132	0.30642	-0.127594	-0.0944971	0.193882	-0.182242	0.112112	-0.0743255	-0.0442089	-0.170078	0.154049
2-Amino-1,3,4-octadecanetriol	-0.193495	0.415533	-0.362602	-0.207331	0.127872	-0.0785276	0.150726	0.261952	-0.0717344	0.189969	-0.258923	-0.165867	-0.00715378	-0.152507	-0.0539145	0.311181	0.602654	-0.0785684	0.283857	-0.258387	0.438077	0.498046	0.39123	-0.101207	0.0951653	-0.108895	0.519061	0.137793	-0.0146437	-0.158276	-0.15835	-0.260931	0.303432	0.301049	0.189883	0.124301	0.139045	-0.348377	0.349684	0.220782	0.10896	0.195209	0.360586	-0.262644	0.272076	-0.172827	0.531177	-0.304466	0.109077
(+/-)-Octopamine	0.110853	-0.217364	0.181916	0.24711	-0.0479825	-0.179803	0.00352226	-0.335032	-0.190136	-0.0481584	0.33492	0.334698	0.0366284	-0.0743581	0.0320323	-0.149477	-0.259312	0.278997	-0.0603446	0.342947	-0.203258	-0.312891	-0.165585	-0.338886	0.245781	0.212074	0.204887	0.185355	-0.279858	-0.020969	0.324937	0.166738	-0.0383326	-0.25024	-0.250119	0.23012	-0.167916	0.273011	-0.229242	-0.117821	-0.338967	0.0799209	-0.306548	0.305461	0.194684	-0.0134376	-0.26933	0.382558	-0.115308
N-(4-chlorophenyl)-5-hex-1-ynylnicotinamide	-0.271305	-0.15414	0.336216	0.276878	-0.21527	0.165905	0.00248423	-0.151334	-0.0330811	-0.253928	0.0305188	-0.0115001	-0.145305	-0.0810638	-0.181033	-0.128589	0.0332903	0.0944362	-0.0590948	0.0502876	0.546418	-0.641329	0.363376	-0.202685	0.0850078	-0.205389	-0.177955	-0.104399	-0.155027	0.136457	0.0104387	0.17999	0.251161	0.0218761	0.658623	-0.101276	0.411384	0.104763	0.482968	0.163706	0.0330939	-0.0557523	0.0711855	0.00526648	0.121772	0.00927996	-0.260964	0.215202	0.0978802
2-Hydroxybenzothiazole	0.150312	-0.0179493	-0.0429024	-0.172003	-0.170029	0.176582	0.121183	0.00657886	-0.203835	-0.0806716	-0.126289	-0.0126959	-0.149944	-0.177634	-0.133644	0.00439148	0.0805443	0.0115828	0.104955	-0.116704	0.3068	-0.0833659	0.603522	-0.052191	0.208414	-0.257053	0.0288902	0.00110653	-0.0763719	-0.154226	-0.00985239	0.124975	0.398618	0.0872634	-0.0176827	0.00123103	0.125849	-0.319065	0.597488	0.741671	-0.172903	0.106752	0.673946	-0.130086	0.372423	-0.254939	0.218628	-0.0667424	-0.0353488
Fexofenadine	0.103234	-0.275249	0.10278	0.237814	-0.301492	0.064397	0.359945	-0.0911603	-0.120791	-0.253345	0.129843	-0.0998035	-0.109405	0.141214	-0.0477038	0.0403141	-0.0301095	-0.0635451	0.46491	0.121053	-0.0501983	-0.103762	-0.108552	0.134009	0.0489597	-0.163512	0.0160333	-0.307441	0.331726	-0.0991074	-0.0984292	0.0907029	-0.25741	0.348704	0.0124575	-0.325735	-0.0271431	-0.172181	0.00688569	-0.0794261	0.0239308	0.3526	-0.11204	0.154474	-0.0735375	0.0701076	-0.387862	0.111895	-0.00125134
PC (14:0e/22:1)	-0.377188	0.0927767	0.0524707	0.19376	0.116667	-0.129574	0.156562	0.0388978	-0.00866639	0.0297767	-0.106829	-0.0934188	0.0399522	-0.00305806	-0.0144739	0.0718376	0.370198	-0.053532	0.0905688	-0.0972067	0.0813198	0.0565105	-0.166842	0.0098716	-0.168828	0.0402049	0.303361	0.326783	0.117645	0.00951284	-0.0900079	-0.233171	-0.0111488	0.154685	0.147799	0.324817	0.0431419	-0.126497	-0.242572	-0.478822	0.196499	0.0586493	-0.366142	-0.135864	-0.0555045	0.114577	-0.105914	-0.0926081	0.113325
ACar 17:0	0.0875713	-0.260207	0.281885	-0.354496	-0.0905324	0.182126	-0.0471672	0.0130753	0.477201	0.051708	0.137803	0.449949	-0.233365	-0.220902	-0.34304	0.104683	0.0432494	0.469964	0.0749704	0.138796	0.103548	-0.189036	0.118049	0.0778976	0.212328	-0.253634	0.00589979	-0.139067	0.160317	0.622783	0.459098	-0.0106693	0.0197876	0.1532	0.00573833	-0.140314	0.0197842	-0.207805	0.174651	0.10372	0.431835	-0.0541734	0.222733	0.10683	0.415449	-0.280879	0.155185	-0.0915509	-0.171363
PC (17:0/18:4)	0.34636	-0.124335	-0.105511	0.103386	-0.157978	0.0588308	-0.209277	0.163564	0.0182068	-0.132369	-0.04564	-0.130241	-0.239069	-0.0523121	-0.189596	0.0783202	-0.203611	-0.124457	-0.132486	-0.0299605	0.220267	-0.194111	0.390643	-0.0664752	0.182927	-0.282052	-0.233296	-0.14059	-0.00347114	-0.0305998	-0.127238	0.115443	0.142633	0.144539	0.0356535	-0.158819	0.119663	-0.155392	0.542895	0.574427	-0.141971	-0.0585519	0.483243	-0.0342057	0.237724	-0.353211	0.0758521	0.139339	-0.249846
Lysops 22:6	-0.0329784	-0.0413604	0.10816	0.520145	-0.484718	0.0412525	-0.0571445	-0.179701	-0.566892	-0.337644	0.164994	0.00506892	-0.290775	0.42499	-0.270232	-0.234212	0.0193784	-0.00585224	-0.0238906	0.160932	0.274965	-0.216246	0.21083	-0.269868	0.248513	-0.343404	-0.181288	0.604014	-0.312348	-0.431735	0.00366554	-0.213687	0.141164	-0.238418	0.172539	0.594045	-0.222876	0.146673	0.193159	-0.0551899	-0.263774	-0.284745	0.120911	0.15718	0.320076	-0.209781	-0.0746292	0.241728	-0.264069
L-Phenylalanine	-0.310913	0.279762	-0.054712	0.118905	-0.154416	0.126459	-0.269472	0.184508	-0.0457865	-0.229226	0.0108169	0.0133622	-0.264142	0.384888	-0.280613	0.221083	-0.0336721	0.0973077	-0.0864696	0.0117929	0.310229	0.0861139	0.186738	0.0191706	0.0139911	-0.239504	-0.133528	-0.0511625	-0.00168967	-0.145498	0.0285428	-0.171428	-0.0461098	0.0688063	0.517298	-0.0671478	0.0903507	0.303401	0.239487	0.0323997	-0.0727749	-0.141554	0.00868412	0.010066	0.0217565	-0.0879579	0.0165027	-0.0513461	-0.00461824
PC (14:0e/20:5)	0.413854	-0.159784	-0.0275382	-0.133987	-0.0512552	0.0195592	0.0586033	-0.0694053	-0.143886	-0.244663	-0.0367311	-0.19819	-0.170329	-0.0968766	-0.112978	-0.067965	-0.226636	-0.220969	0.158312	-0.0592525	0.0740031	-0.110744	0.29314	-0.11047	0.0963563	0.17677	-0.0255874	-0.0996928	-0.100032	-0.0714834	-0.203077	0.165604	0.238688	-0.0484729	-0.127963	-0.0882117	0.0635877	-0.0248765	0.311848	0.538491	-0.2406	-0.0277416	0.315072	0.00251617	0.0188262	-0.252552	0.0950244	0.0222754	-0.122823
Palmitoleic acid	0.0132154	-0.473189	0.534043	-0.106291	-0.479296	0.455921	0.273732	0.0992342	-0.0228833	-0.449232	-0.171868	-0.140204	-0.337521	-0.178067	-0.278892	-0.00853713	-0.374024	-0.130959	0.0998699	-0.18415	0.0978705	-0.446229	0.370492	0.110232	-0.122468	-0.310228	-0.239272	-0.0688906	0.246196	0.0319103	-0.136218	-0.0566444	0.141137	0.306519	-0.0132251	-0.0343097	0.0462505	-0.425613	0.291899	0.379825	-0.0942051	-0.0236105	0.28395	-0.181975	0.0441367	-0.107561	-0.188402	-0.0970217	-0.104174
Valerophenone	-0.321298	0.163187	0.0493297	0.261069	-0.31138	0.268787	0.147785	-0.241216	-0.565869	-0.287729	-0.160423	-0.220173	-0.297512	0.251461	-0.269337	-0.242069	0.299605	-0.200836	0.0740138	-0.163792	0.322046	0.151231	0.442598	0.102878	0.106036	-0.120919	0.140037	0.410961	-0.193405	-0.344772	-0.219931	-0.226256	0.388235	-0.173898	0.15037	0.410324	-0.0134456	-0.0562645	0.235847	0.222582	-0.225816	-0.131749	0.240524	-0.1691	0.410038	-0.215777	0.328159	-0.0732951	0.107734
8-Hydroxyquinoline	0.187302	-0.387952	0.330453	0.0805182	-0.362373	0.360635	0.0751079	-0.157314	-0.237195	-0.345451	-0.0790514	-0.151817	-0.241881	-0.105569	-0.155992	-0.277545	-0.379343	-0.192664	-0.0988927	-0.0748957	0.056743	-0.446726	0.424306	-0.0802099	0.0758151	-0.0667471	-0.210323	0.00603277	-0.214885	-0.0923173	-0.155749	0.181943	0.2677	-0.1497	-0.12121	0.0338069	0.0803633	-0.155328	0.341337	0.570347	-0.39567	-0.117965	0.394113	-0.0840821	0.178213	-0.189699	-0.0375693	0.177504	-0.0487005
Indole-3-acrylic acid	0.276436	0.0643796	-0.47512	0.567981	0.17679	-0.363358	-0.244862	-0.104064	-0.110212	0.200978	0.376247	0.0698938	0.0206289	0.221572	0.0567052	0.0298118	0.189081	0.0357342	0.0575014	0.403154	-0.12545	0.207763	-0.335689	-0.288358	0.46308	0.102666	0.298221	-0.115887	-0.254648	-0.0502343	0.0615001	0.328751	-0.303906	-0.156854	-0.145793	-0.162609	-0.0574383	0.258726	-0.174561	-0.233791	-0.148019	0.154546	-0.266142	0.380264	0.25869	-0.144497	0.146875	0.473421	-0.116918
Serine	-0.307691	-0.175947	0.519091	-0.45001	-0.195327	0.49174	0.395002	-0.0717565	-0.0719549	-0.330645	-0.295688	-0.163283	-0.127985	-0.246886	-0.127585	-0.220033	0.0273879	-0.0805703	0.212796	-0.328836	0.436991	-0.376837	0.517323	0.184581	-0.240957	-0.0849743	-0.222018	-0.0755643	0.145264	0.105678	-0.146619	-0.065143	0.456328	0.21403	0.38447	-0.0410435	0.350117	-0.293973	0.40307	0.3276	0.190302	-0.0577693	0.372431	-0.294575	-0.123722	0.0385256	-0.0335647	-0.379552	0.269925
PC (17:0/18:2)	-0.319316	0.254291	-0.13209	0.267845	0.287459	-0.230319	0.050703	-0.0600206	-0.141666	0.120181	-0.150805	-0.251225	0.173061	0.0372964	0.165715	-0.0486484	0.32863	-0.276091	-0.132459	-0.15449	-0.075831	0.212539	-0.302155	0.290597	-0.255642	0.0186737	-0.0602894	0.240231	0.302704	-0.0209561	-0.255371	-0.0167731	0.0671722	-0.0861694	-0.0178776	0.225178	-0.104112	0.0458974	-0.388043	-0.402174	0.30045	-0.113112	-0.521328	-0.146436	-0.169284	0.292041	0.0892882	-0.227429	0.0315373
gamma-Glutamylleucine	0.0502681	-0.100251	0.160849	-0.386801	-0.0437861	0.136469	-0.233859	0.552881	0.557335	0.119694	-0.366554	-0.279656	-0.0971649	-0.187051	-0.164687	0.347864	-0.0480783	-0.265755	-0.149685	-0.383369	0.288802	-0.0433997	0.29697	-0.140177	-0.229201	-0.455741	-0.171494	0.206474	0.138058	0.423249	-0.271784	-0.507556	0.166599	0.271386	0.129131	0.198967	-0.0454584	-0.533186	0.348617	0.107396	0.552352	-0.395764	0.383776	-0.362438	-0.0348349	-0.287278	0.270449	-0.385554	-0.296087
PC (16:1e/22:6)	0.261178	-0.293968	0.150316	0.0180969	-0.294778	0.242756	0.167727	-0.143638	-0.199275	-0.209779	-0.00469022	-0.0734851	-0.0799678	-0.0788154	0.00860855	-0.198932	-0.282138	-0.0913646	0.0533205	-0.00124254	-0.00608585	-0.309497	0.286588	0.060723	0.0852522	-0.131241	-0.256675	-0.23434	-0.00271887	-0.149063	-0.0759318	0.266464	0.110129	0.0181899	-0.126597	-0.227578	0.0664458	-0.163738	0.320624	0.517358	-0.266915	0.116562	0.389162	0.00934113	0.0668394	-0.0430361	-0.164279	0.142402	-0.00494871
Celestolide	-0.555701	0.484038	-0.0713161	0.135488	0.123016	0.0285547	-0.0134134	-0.204611	-0.301882	-0.129699	-0.299236	-0.204134	-0.116709	-0.0744914	-0.131165	-0.166141	0.28895	-0.136113	-0.291005	-0.295427	0.387053	0.208625	0.360443	0.417133	-0.135726	0.183793	0.0533094	0.166811	0.0864363	-0.140618	-0.194404	-0.223151	0.506629	-0.0215483	0.376322	0.192007	0.247521	0.226599	0.175835	0.185918	-0.0762834	-0.105911	-0.0524838	-0.31141	0.244731	-0.0559488	0.325206	-0.212418	0.236469
PC (19:0/20:4)	0.334193	-0.263493	-0.061332	0.218519	-0.00223182	-0.168526	-0.305008	0.0290361	0.21044	0.267574	0.615477	0.50111	-0.00446628	0.143671	0.0208271	-0.0196269	-0.124973	0.43183	0.0127287	0.602809	-0.247761	0.00765684	-0.584442	-0.236768	0.510435	-0.224051	-0.103749	-0.148462	0.00465267	0.325611	0.494987	0.0700603	-0.563127	0.102254	-0.271164	-0.168724	-0.31022	0.14408	-0.40869	-0.687074	0.288389	-0.0286072	-0.299579	0.605946	0.262595	-0.203443	0.0884305	0.350771	-0.370209
2-Hydroxycinnamic acid	0.227849	-0.511011	0.40878	-0.0412654	-0.14473	0.166603	0.145137	-0.16751	0.238623	-0.10878	-0.0876245	-0.209668	-0.06417	-0.116319	-0.106592	-0.248592	0.049514	-0.221361	0.153016	-0.0967571	0.15057	-0.544564	0.124407	-0.0570507	-0.086758	-0.162838	-0.244945	0.0810563	0.012934	0.468744	-0.206263	0.0683182	0.181068	-0.085367	0.0632239	0.0563798	0.0943694	-0.366201	0.23049	0.0669334	0.475482	-0.226334	0.204741	-0.0729384	-0.0508191	-0.104779	-0.185032	-0.0134773	-0.0924616
Tetrahydrocortisone	-0.0552206	-0.555152	0.758688	0.0230599	-0.581559	0.454126	0.255927	-0.215448	-0.249261	-0.363805	-0.0515884	-0.0704361	-0.0997093	0.0388347	-0.0469588	-0.37788	-0.47516	-0.15074	-0.0628038	-0.0797614	-0.134827	-0.574827	0.117217	-0.0644817	-0.186756	-0.271267	-0.413792	0.386233	-0.0785738	-0.0539262	-0.0784959	-0.17848	0.117428	-0.221723	-0.197173	0.435652	-0.301789	-0.225373	-0.0829861	-0.0238405	-0.0970599	-0.308977	0.0582029	-0.0631318	-0.0839328	0.100983	-0.340532	-0.00392047	-0.116666
Paracetamol	0.145938	-0.0533435	-0.088583	0.33781	0.075689	-0.336972	-0.0341356	0.000643197	-0.11397	-0.0911848	0.0348757	-0.0781865	-0.125822	0.108072	-0.178171	0.0837088	0.139951	-0.143667	0.0236645	0.0479249	-0.162889	-0.00835918	-0.21676	-0.295197	-5.46189e-05	0.1711	0.296764	0.597053	-0.18839	-0.0964179	-0.0914347	-0.0127202	-0.00430657	-0.299846	-0.228912	0.58507	-0.218957	0.0413907	-0.275938	-0.216793	-0.147089	-0.184717	-0.329057	0.020616	0.0347408	-0.0597024	-0.0307359	0.131624	-0.26293
PC (19:0/20:5)	-0.0734308	0.158402	-0.0138297	-0.0534148	0.42422	-0.243794	0.0562996	-0.331997	-0.268411	-0.301175	0.0235128	0.0139092	-0.044474	-0.121828	-0.0665971	-0.304984	0.0952169	0.0808474	0.0314862	0.0116527	0.323476	-0.333579	0.133007	0.0537898	-0.0709676	0.617749	-0.0214012	0.0510893	-0.0431995	-0.0708365	0.0244181	0.28499	0.412344	-0.0557838	0.38303	0.0740638	0.497969	0.476571	0.142882	0.127819	-0.14042	0.00226488	-0.150147	0.033905	-0.207376	-0.0340337	-0.246092	-0.00829533	0.21258
N-Arachidonoyl-L-serine	-0.0490012	0.0683456	0.00367985	0.146905	-0.447797	0.212328	-0.139802	0.134536	-0.280149	-0.182838	0.188242	0.304767	-0.208363	0.115884	-0.161403	0.014569	-0.232727	0.333888	-0.199845	0.203341	0.202103	-0.144197	0.282839	-0.149272	0.2846	-0.393023	-0.346591	-0.0902012	-0.204563	-0.418083	0.31278	0.106955	-0.0301701	-0.0107095	0.234711	-0.0809262	0.00162461	0.215651	0.328945	0.291782	-0.469511	-0.0486869	0.329269	0.163217	0.268294	0.0134301	0.0547337	0.234597	-0.128044
Spermidine	0.448161	-0.486583	0.273053	0.459263	-0.432419	0.0868122	-0.317506	-0.432745	-0.178334	-0.0504303	0.428069	0.181375	-0.089035	0.180332	-0.0115002	-0.464763	-0.555446	0.0656057	-0.282293	0.424893	-0.146211	-0.433911	-0.0127423	-0.409126	0.483097	-0.113961	-0.229989	0.157836	-0.535788	0.0919	0.167253	-0.0327623	-0.0907126	-0.414667	-0.314876	0.178873	-0.337583	0.212098	0.0318833	-0.0227641	-0.273417	-0.256483	0.118076	0.427959	0.450762	-0.405257	-0.10199	0.641513	-0.339205
2-Aminoethanesulfinic Acid	0.0634664	0.255948	-0.354875	0.154495	0.16787	-0.252506	-0.119164	-0.170621	0.0504234	0.295524	0.124336	0.281161	0.0732278	-0.0711658	0.00673264	-0.0839388	0.354098	0.26616	-0.178536	0.163684	-0.10805	0.279403	-0.145783	0.123166	0.2157	0.207544	0.194821	0.0299531	-0.162287	0.0166938	0.277202	0.124368	-0.0324464	-0.245828	-0.10462	0.00533984	0.00756634	0.206087	-0.111419	-0.0360988	-0.0757683	0.0656802	-0.0171045	0.101795	0.356457	0.00432427	0.265401	0.213604	0.0290327
Palmitoyl ethanolamide	0.0995747	-0.00338751	0.0193226	-0.159143	-0.272407	0.171726	0.333438	-0.12126	-0.229796	-0.15634	-0.281942	-0.205508	-0.130291	-0.229486	-0.140544	-0.0579875	0.185854	-0.174018	0.191491	-0.276896	0.293394	-0.0289158	0.632198	0.0565495	0.0327406	-0.0988523	0.105516	0.0723613	-0.0763824	-0.191399	-0.204221	0.0146025	0.500513	-0.0301584	0.0172277	0.0765436	0.10311	-0.344561	0.575713	0.775138	-0.182445	0.0924695	0.624896	-0.271704	0.294664	-0.114483	0.200292	-0.120477	0.0426625
PC (16:2e/4:0)	0.36941	-0.338403	0.159391	0.0223817	-0.443082	0.182401	0.00274685	0.277487	0.0650895	-0.363852	-0.175171	-0.316536	-0.370922	0.00905986	-0.328029	0.167421	-0.354211	-0.33363	0.0567419	-0.182152	0.0727617	-0.201689	0.330414	-0.129947	-0.0541572	-0.249916	-0.164429	0.0813158	0.0159273	-0.0816286	-0.319197	-0.187183	0.0492668	0.141601	-0.0664808	0.0797379	-0.0897582	-0.332847	0.381362	0.437253	-0.190789	-0.17916	0.397315	-0.154419	0.0303754	-0.292412	-0.0413094	0.0346731	-0.34082
γ-Tocopherol	0.202004	-0.313595	0.270056	0.197424	-0.421637	0.374682	-0.361506	-0.156249	-0.0306325	-0.36071	0.217189	-0.0145685	-0.311721	0.380091	-0.233897	-0.176696	-0.62267	-0.0181673	-0.137663	0.211086	0.10171	-0.38814	0.261314	-0.240356	0.242746	-0.100118	-0.303776	-0.272337	-0.398839	0.061411	-0.0101633	0.0420213	-0.100123	-0.217116	0.205591	-0.267735	0.0483854	0.321145	0.356839	0.304118	-0.330204	-0.223428	0.257223	0.236313	0.108004	-0.361244	-0.170815	0.39022	-0.0762846
Monoolein	0.37217	-0.401145	0.217456	0.0017462	-0.322586	0.168788	0.0673197	-0.0443812	-0.00629903	-0.163763	0.0110712	-0.0891277	-0.116747	-0.0756562	-0.0788263	-0.0321549	-0.320496	-0.138046	0.054399	0.00713487	-0.0416406	-0.352949	0.22405	-0.130328	0.0879336	-0.279644	-0.242316	-0.0866619	-0.0225824	0.0692792	-0.0943945	0.200886	0.0871621	-0.0940368	-0.202561	-0.0866831	-0.127143	-0.2348	0.284048	0.45903	-0.0683165	-0.0694309	0.307109	0.0278302	0.0876563	-0.0923019	-0.0983037	0.0966683	-0.241762
SM (d21:1/15:0)	0.0246247	0.24443	-0.312189	-0.221412	0.3481	-0.331315	0.210555	0.28833	0.32112	-0.0752276	-0.334753	-0.198418	-0.172186	-0.213312	-0.328995	0.552898	0.525153	-0.141132	0.324417	-0.310087	0.0300357	0.291535	0.0358103	0.0916743	-0.291261	0.324965	0.53758	0.0845154	0.22157	0.110982	-0.195115	0.163826	0.155145	0.011737	0.0845588	0.0484014	0.197678	-0.151816	0.0479543	0.293249	0.0879575	0.0943085	-0.132768	-0.333635	-0.154537	0.124979	0.154172	-0.329904	-0.00102873
N-Cyclohexyl-N-methylcyclohexanamine	-0.123933	-0.384432	0.407231	-0.176092	-0.27199	0.360652	0.711542	-0.0732982	-0.166084	-0.21126	-0.103542	-0.0540506	0.00225063	-0.182584	0.016184	-0.17257	0.227143	-0.058575	0.489305	-0.11271	-0.113376	-0.264916	-0.0341342	0.102005	-0.192023	-0.0939418	-0.0502874	-0.0430046	0.147474	-0.0726396	-0.054587	0.358835	0.021139	-0.0112994	-0.0956164	-0.043432	0.06059	-0.442698	-0.158055	-0.0171876	0.0603904	0.146878	0.0125185	-0.116734	-0.241724	0.486698	-0.135204	-0.183588	0.223648
PC (18:5e/17:2)	0.0392197	-0.316364	0.370946	0.0443538	-0.364498	0.204124	0.338736	-0.0452181	-0.260142	-0.266345	-0.17814	-0.184444	-0.170329	-0.533246	-0.12837	-0.297247	-0.0505706	-0.207115	-0.0862224	-0.190691	0.268912	-0.4524	0.382612	-0.104875	0.000272786	-0.107355	-0.285289	0.191455	-0.0820414	-0.091431	-0.183805	0.120025	0.478461	-0.050794	0.0131542	0.23773	0.0935022	-0.281336	0.26315	0.349463	-0.169549	-0.230681	0.253415	-0.195264	0.199569	0.0781922	0.252747	0.0176284	-0.157645
PC (17:0/17:1)	0.106735	-0.0454325	-0.000995059	-0.00187772	-0.0685276	-0.00278298	0.027115	-0.0151451	0.157968	-0.0351571	-0.0277359	-0.0109034	-0.0675982	-0.141523	-0.061231	-0.208776	-0.0367412	-0.0146558	-0.10789	-0.0242841	-0.126047	0.102283	-0.158891	0.124465	-0.0778909	0.477342	0.0464767	-0.0386476	-0.154804	-0.00911578	-0.0129069	-0.222884	-0.139712	0.00157292	-0.00402854	-0.0230939	0.122051	0.119594	-0.179641	-0.222	-0.204542	-0.0579403	-0.0142763	-0.0302465	-0.0342922	-0.0295333	0.0787986	0.205165	0.0904906
PC (14:0e/8:0)	-0.00467247	-0.227331	0.363376	-0.105567	-0.463963	0.547273	-0.031771	-0.0825766	-0.0760431	-0.442092	-0.15379	-0.0716841	-0.507689	0.0344148	-0.4737	-0.2073	-0.21639	-0.027626	-0.0616585	-0.159499	0.401795	-0.298608	0.690263	0.221121	0.100473	-0.267152	-0.267303	-0.0314497	-0.00697339	0.0763409	-0.0607378	-0.208749	0.35548	0.148102	0.23599	-0.0188648	0.20464	-0.199034	0.645567	0.616712	-0.100753	-0.192159	0.667629	-0.158381	0.413437	-0.514262	0.117149	-0.0418343	-0.0321942
1-Methyladenosine	0.108241	0.0823152	-0.27796	0.471799	0.0204636	-0.26054	-0.144474	-0.0537935	-0.188243	-0.0255133	0.18068	0.0309797	-0.147422	0.350567	-0.190577	0.00231114	0.349663	0.0128771	0.0772474	0.208414	0.0186377	0.0746418	-0.155264	-0.277314	0.229341	0.0190822	0.224204	0.403802	-0.31504	-0.176428	0.0258988	0.0973251	-0.100466	-0.305395	0.0241833	0.350513	-0.0742965	0.163129	-0.0847791	-0.216167	-0.127448	-0.109861	-0.129981	0.16898	0.181012	-0.119331	0.0399749	0.274478	-0.140993
PC (18:5e/19:0)	-0.211692	-0.187537	0.381336	-0.0429084	0.142641	0.066656	-0.262388	0.0135355	0.703989	0.0884087	-0.170859	-0.113191	-0.0802146	-0.225881	-0.178849	0.140387	-0.108954	-0.103562	-0.326763	-0.173729	0.0576686	-0.217162	-0.0723083	0.313811	-0.246883	-0.169057	-0.156461	-0.146512	0.434955	0.924775	-0.1034	-0.233822	0.0604735	0.125799	0.150317	-0.140429	0.0199259	-0.120619	-0.0412741	-0.175664	0.765047	-0.299837	-0.343982	-0.180232	0.0715989	-0.137079	0.0299102	-0.220524	-0.14505
γ-Glutamylglutamic acid	-0.381638	0.402472	-0.228087	-0.272581	0.326328	0.11322	-0.117635	0.311426	0.178128	0.350766	-0.472938	-0.3332	0.0650439	-0.197841	0.0407114	0.257974	0.441625	-0.295885	-0.142683	-0.470112	0.309935	0.50615	0.360574	0.23584	-0.129205	-0.25944	0.244874	0.0693912	0.223676	0.220265	-0.327351	-0.320418	0.362634	0.268843	0.0598895	0.0588051	0.112043	-0.473816	0.228917	0.204282	0.446724	-0.0470768	0.270045	-0.482932	0.23247	-0.2115	0.686376	-0.533723	0.13758
(S)-Equol	-0.100135	-0.365065	0.537304	0.212354	-0.399217	0.313806	-0.0651034	-0.156873	0.157081	-0.264729	-0.0697427	-0.0371901	-0.226405	-0.263709	-0.179597	-0.225899	-0.551697	-0.0584273	-0.473907	-0.0662772	-0.0392955	-0.441362	0.123388	0.344901	-0.110653	-0.113861	-0.434422	-0.192769	0.223539	0.293248	-0.0341136	-0.153031	0.0665915	0.0908501	0.0178075	-0.138546	-0.00181448	0.0107003	0.0575047	0.121526	-0.0543983	-0.199117	-0.089689	-0.0899637	0.21431	-0.0702094	-0.132315	0.165238	-0.132738
N-Acetyl-Asp-Glu	-0.470976	0.166067	0.251404	-0.338301	-0.32657	0.540048	0.119104	0.202982	0.00275043	-0.151523	-0.536784	-0.446316	-0.167091	-0.0919856	-0.167941	0.138156	0.0354876	-0.369371	-0.00548003	-0.556189	0.445755	0.19738	0.707663	0.0584691	-0.244681	-0.218358	0.120795	0.0360803	-0.0932695	-0.0271355	-0.434461	-0.515285	0.438163	0.107712	0.354782	0.0698071	0.12241	-0.350528	0.489566	0.478506	-0.00378662	-0.161327	0.485377	-0.535756	0.108659	-0.117667	0.45213	-0.421029	0.230052
Gly-Phe	0.247382	-0.0543969	-0.0425397	-0.0290702	-0.0220908	-0.142038	-0.0224825	0.0368848	-0.0745053	0.0118971	-0.102005	-0.0668271	-0.0275583	0.236399	-0.121388	-0.0718218	0.322148	-0.110129	0.0889474	-0.0958835	0.0887873	-0.131796	0.0997707	-0.239697	-0.068364	-0.212959	-0.0772734	0.773293	-0.217882	-0.100886	-0.0734158	-0.153338	0.194365	-0.312302	-0.0836767	0.720949	-0.181078	-0.260418	0.144025	0.00778489	0.20318	-0.331662	0.335333	-0.0986697	-0.0278941	-0.141334	-0.0935009	-0.10831	-0.235661
2-Amino-1,3-octadecanediol	-0.0845393	0.282161	-0.182316	0.136714	0.167174	-0.374542	-0.264827	0.0245586	0.438167	0.171274	-0.172179	-0.208009	0.0274472	0.136288	-0.127364	0.268818	0.302262	-0.141982	-0.093377	-0.160823	0.214934	0.216861	-0.031946	0.052906	-0.184098	0.0470342	0.24887	0.249481	0.0836416	0.335952	-0.200414	-0.571843	0.0342594	0.0343298	0.336861	0.213979	-0.033524	0.0739075	0.118575	-0.230736	0.475354	-0.137404	-0.166084	-0.153495	0.0328867	-0.205519	-0.0794289	-0.0726381	-0.106088
PC (16:2e/20:1)	-0.247562	0.350795	-0.240101	0.00337488	0.451729	-0.481071	-0.0500201	0.186079	0.396997	0.249814	-0.222261	-0.177826	0.205919	0.0437936	0.0363744	0.536937	0.445436	-0.125994	0.0838437	-0.206598	0.00693673	0.267925	-0.250816	0.0471576	-0.362689	0.00515576	0.373466	0.218183	0.333799	0.274596	-0.173411	-0.178054	-0.023522	0.0443189	0.173908	0.179577	-0.0685463	-0.0375666	-0.173264	-0.288186	0.54272	0.0433052	-0.500315	-0.216432	-0.279123	0.214851	-0.167705	-0.335769	-0.0258253
2,6-Di-tert-butyl-1,4-benzoquinone	-0.239748	0.462072	-0.340484	0.098163	-0.0274381	0.112891	-0.0451664	-0.0141837	-0.332463	-0.0866561	-0.245192	-0.293488	-0.253677	0.0664659	-0.217449	-0.0223625	0.389442	-0.219326	-0.00946308	-0.246525	0.502622	0.460898	0.546765	0.256499	0.161727	-0.0557633	0.163815	0.00357419	-0.0111285	-0.246215	-0.285203	-0.221711	0.42199	0.136133	0.302307	-0.00943987	0.212645	-0.0205985	0.474295	0.435125	-0.106457	-0.00280878	0.397774	-0.232233	0.456644	-0.355179	0.63369	-0.168977	0.126238
PC (18:0/20:3)	-0.142143	-0.571832	0.700916	0.286774	-0.659834	0.497809	0.392202	-0.470394	-0.283957	-0.40565	0.0793886	-0.119006	-0.268037	0.201309	-0.242378	-0.436729	-0.0736833	-0.166674	0.294398	0.0549164	-0.050969	-0.367214	0.0499506	-0.0955732	0.0610729	-0.116281	0.0343901	0.276527	-0.245582	0.108267	-0.125195	-0.127516	0.0389364	-0.338498	-0.0762187	0.296807	-0.236497	-0.171851	-0.150802	-0.199848	-0.0234894	-0.197992	-0.100429	0.0691641	0.206541	-0.0127258	-0.091353	0.154261	0.0320354
PC (14:0e/9:0)	-0.0774428	-0.280491	0.501198	0.0511792	-0.446251	0.405012	0.0386416	-0.242114	-0.137242	-0.529252	-0.105304	-0.166248	-0.370658	0.0792255	-0.377675	-0.309481	-0.175205	-0.0948736	-0.00392358	-0.117081	0.543435	-0.643015	0.612707	-0.0072974	-0.0142267	-0.201982	-0.394587	0.0613954	-0.134651	0.0856598	-0.149457	-0.0731073	0.426232	-0.0600721	0.537259	0.0697592	0.286023	0.0111114	0.654395	0.453302	-0.00456126	-0.287493	0.426269	-0.097507	0.123811	-0.256109	-0.216172	0.0412838	0.00297806
DAG (18:2/20:4)	-0.22703	0.316221	-0.230123	-0.0758674	0.152035	-0.237876	0.0579288	0.545182	0.227211	0.0395301	-0.382518	-0.153326	-0.0524907	-0.152485	-0.163582	0.620472	0.36964	-0.0771012	-0.00245326	-0.348955	0.187553	0.171157	0.141576	0.102915	-0.335894	-0.295206	0.159477	0.23914	0.409414	-0.107259	-0.144206	-0.145909	0.108989	0.348283	0.208163	0.211334	0.0784758	-0.343687	0.184926	0.151305	0.176926	0.0726016	0.00220446	-0.405797	-0.116453	0.160248	-0.0352295	-0.370038	-0.115065
4,7-dimethylpyrazolo[5,1-c][1,2,4]triazine-3-carbonitrile	0.0610967	0.266614	-0.286875	-0.296511	0.302261	-0.225849	-0.175327	0.425616	0.345813	0.0891121	-0.286085	-0.159694	-0.16522	-0.13282	-0.269464	0.290028	0.422891	-0.0811094	0.0430249	-0.285843	0.437044	0.231238	0.252927	-0.0360162	-0.0982915	0.0494245	0.218745	0.308304	0.0810946	0.155955	-0.148575	-0.44514	0.235387	0.364119	0.290978	0.279026	0.254878	-0.260522	0.349432	0.0386399	0.347945	-0.149742	0.340712	-0.283893	0.0567685	-0.422657	0.298315	-0.293133	-0.116146
ACar 22:6	0.216596	-0.259347	0.249909	-0.289781	-0.144512	0.228821	-0.410258	0.339388	0.688769	-0.0610247	-0.0332447	0.137329	-0.359465	-0.22663	-0.408828	0.221947	-0.438345	0.106629	-0.379516	-0.0381193	-0.0428772	-0.143225	0.067065	0.101804	-0.0133594	-0.172881	-0.357791	-0.258904	0.1305	0.626971	0.142872	-0.1061	-0.0818505	0.03511	-0.0075833	-0.247492	-0.0343448	-0.0252588	0.123063	0.198192	0.228567	-0.444895	0.135953	-0.0434394	0.174359	-0.278565	0.336	-0.0596876	-0.376591
PC (19:2/18:5)	0.422716	-0.463355	0.24397	0.232306	-0.533549	0.27113	0.00682349	-0.150379	-0.271531	-0.322696	0.163803	-0.0375942	-0.254467	0.117534	-0.142956	-0.255613	-0.492036	-0.12407	-0.0351829	0.154129	-0.129227	-0.357506	0.160653	-0.116326	0.22779	-0.257298	-0.400927	-0.030918	-0.160884	-0.15608	-0.0481726	0.187746	-0.0175926	-0.206263	-0.278419	-0.0244024	-0.225952	-0.0506938	0.175998	0.36104	-0.350949	-0.167914	0.289071	0.180342	0.189605	-0.163806	-0.0638663	0.299293	-0.297572
PC (20:4e/22:6)	-0.316103	-0.203673	0.267798	0.019611	-0.129248	0.267405	0.141412	0.188516	0.179817	0.122733	0.0245531	0.0832193	0.0304867	-0.159896	0.0744161	0.0978331	-0.0468292	0.0872405	0.0410379	0.0266946	-0.147024	0.0573091	-0.214556	0.0100934	0.000535482	-0.158698	0.202701	-0.179626	0.147446	0.176599	0.0844256	-0.163083	-0.309028	0.365149	-0.105018	-0.150012	-0.03632	-0.311004	-0.334072	-0.455896	0.107632	0.185716	-0.241719	-0.0192963	0.0660254	0.0980864	0.0657672	0.00689358	0.130957
PC (20:0/22:6)	-0.297707	0.328326	-0.254806	0.152373	0.250154	-0.192901	-0.293235	0.247698	0.183635	0.40014	0.0927915	0.17281	0.259656	0.0317952	0.233931	0.143815	0.192297	0.199209	-0.306518	0.115013	0.00728897	0.223459	-0.33077	-0.0540905	0.0125341	-0.111104	-0.0356004	-0.0472311	-0.00616778	0.0148295	0.179342	-0.0753006	-0.273852	0.0899781	0.198667	-0.0631021	0.0309242	0.184491	-0.255096	-0.536655	0.17863	-0.001598	-0.295414	0.0643703	-0.0640789	0.213655	0.100132	0.0607936	0.0655371
Norethisterone	-0.16676	-0.255636	0.392493	-0.444614	-0.202632	0.550405	0.237268	-0.00797997	0.455456	-0.0170011	-0.296216	-0.16714	-0.0723588	-0.101432	-0.104682	0.130601	-0.0762582	-0.149568	0.226712	-0.298836	-0.156738	0.106092	0.189357	0.263577	-0.240456	0.00242088	0.276117	-0.381252	0.101564	0.476646	-0.164784	-0.152237	-0.0388379	0.0468523	-0.0890557	-0.370122	0.0396089	-0.428133	0.0480738	0.260148	0.214245	0.108374	0.192762	-0.296744	-0.013724	-0.00203643	0.102207	-0.265951	0.308235
N,N-Dimethyldecylamine N-oxide	-0.154634	0.313354	-0.282682	-0.211201	-0.020912	0.0920623	0.225826	0.131249	-0.158559	0.151957	-0.20663	-0.115219	-0.0397108	-0.245886	-0.0405912	0.244406	0.45021	-0.0414292	0.293048	-0.205471	0.389616	0.459654	0.519374	-0.0570146	0.233512	-0.152117	0.51164	-0.112038	-0.0408318	-0.152231	-0.109556	-0.0870893	0.341992	0.265739	0.0774421	-0.108249	0.12869	-0.362563	0.437593	0.490492	-0.0529854	0.305464	0.468706	-0.211246	0.448784	-0.177593	0.623253	-0.223994	0.148646
PC (16:0e/2:0)	0.337164	-0.211214	0.0694389	0.058581	-0.350354	0.17044	0.0318213	-0.0996475	-0.10356	-0.304669	-0.137905	-0.282013	-0.330138	0.0854829	-0.331192	-0.0740527	-0.0327601	-0.286267	0.13711	-0.137544	0.23585	-0.183019	0.500654	-0.115045	0.106818	-0.130912	-0.0427156	0.135727	-0.219588	-0.0286769	-0.283157	-0.0107393	0.310148	-0.190815	0.0344819	0.113228	0.0175654	-0.195926	0.549044	0.631715	-0.140107	-0.183608	0.540849	-0.111108	0.247969	-0.35474	0.104031	0.0701454	-0.175408
N-Caffeoyl Putrescine	-0.349074	0.00850669	0.270219	-0.0462455	-0.231063	0.388085	0.0436292	-0.0520556	-0.200376	-0.428041	-0.143889	-0.13951	-0.294439	0.509582	-0.312836	-0.0535365	0.0755327	-0.0390822	0.258181	-0.148466	0.392903	-0.177256	0.423675	-0.00124333	-0.126271	-0.135183	0.0699573	0.250564	-0.121566	-0.163303	-0.125131	-0.323897	0.142723	0.0981731	0.494463	0.234655	0.230811	-0.0540579	0.376348	0.0963664	-0.0353452	-0.0468752	0.303645	-0.146422	-0.0835518	-0.26373	-0.340627	-0.147134	0.268586
Oleamide	-0.00674693	0.049235	0.0950925	-0.208534	0.115486	-0.0375739	-0.161288	0.0940531	0.404274	0.00153049	-0.362238	-0.263672	-0.0996213	0.0931648	-0.196773	0.00772474	0.061775	-0.302397	-0.22227	-0.374512	-0.132402	0.19361	-0.0979099	0.383752	-0.469559	0.144109	-0.0925134	0.462052	0.213951	0.3287	-0.268557	-0.609555	0.0757288	-0.095698	-0.0854931	0.447303	-0.168797	-0.142233	-0.178758	-0.214945	0.431002	-0.448933	-0.0508546	-0.346491	-0.167473	-0.178656	0.0555371	-0.354028	-0.127957
PC (22:6e/20:5)	-0.220851	0.190649	-0.167882	0.129292	0.322017	-0.116052	-0.243228	-0.0739874	0.0106227	0.365859	0.318652	0.473309	0.303687	0.142441	0.31095	-0.12866	0.118489	0.486281	-0.23887	0.345456	-0.0941631	-0.00977034	-0.367401	0.147503	0.165101	-0.143627	-0.196644	-0.182697	0.115935	0.0356357	0.478863	0.224095	-0.29845	0.10943	0.0637421	-0.20456	0.0886806	0.248307	-0.25978	-0.471839	0.196309	0.191886	-0.225244	0.28568	0.00242425	0.159531	-0.214863	0.135991	0.171088
Acetylcarnitine	-0.0287982	0.354781	-0.3361	-0.415579	0.226579	-0.1942	-0.0678485	0.761349	0.406058	0.0658843	-0.431788	-0.282588	-0.161533	-0.238365	-0.238883	0.651967	0.301413	-0.195339	0.0855752	-0.440241	0.347218	0.434639	0.238172	0.0405773	-0.267722	-0.124253	0.199903	0.119991	0.364623	0.0252087	-0.271428	-0.467117	0.136547	0.585725	0.242573	0.103836	0.142698	-0.395936	0.297515	0.135606	0.296151	-0.0563214	0.246233	-0.422661	-0.11305	-0.195671	0.38262	-0.506748	-0.184586
5-Methylcytosine	0.296826	-0.448745	0.288256	0.191679	-0.147165	-0.0274483	-0.0398637	-0.116821	0.00862921	-0.0743336	0.231497	0.217825	-0.0518094	-0.244246	-0.0295202	-0.203278	-0.407859	0.0960573	-0.254337	0.24038	-0.375257	-0.425354	-0.259202	-0.294648	0.121948	0.155154	-0.143828	0.134203	-0.27383	0.105336	0.203478	0.32309	-0.102418	-0.388477	-0.410043	0.172339	-0.195369	0.125446	-0.331739	-0.0816834	-0.31831	-0.220325	-0.24923	0.200286	0.0760167	0.105294	-0.0519014	0.372855	-0.271286
1-(2-furyl)pentane-1,4-dione	0.330799	-0.102796	-0.336792	0.661278	0.0190857	-0.226192	-0.310558	-0.149429	-0.120468	0.151857	0.441909	0.114004	-0.0357431	0.235963	0.0261012	-0.0952326	0.0404759	0.0613596	-0.0530778	0.473811	-0.123198	0.00772061	-0.28822	-0.332283	0.543255	-0.0271892	0.113231	-0.14837	-0.339756	-0.0082416	0.105781	0.3928	-0.323114	-0.220494	-0.153189	-0.193657	-0.0621721	0.248817	-0.108027	-0.188341	-0.193537	0.0664341	-0.172952	0.438108	0.344549	-0.1897	0.111568	0.607157	-0.170032
D-Fructose 6-Phosphate-Disodium Salt	-0.056713	0.390784	-0.558427	0.24955	0.3073	-0.262688	-0.1718	0.218118	-0.0765553	0.253465	-0.0682524	-0.18206	0.0338819	0.0961867	0.0352895	0.178587	0.503205	-0.158212	0.00044915	-0.0436431	0.160122	0.456719	-0.0296569	-0.0916079	0.14401	0.00588515	0.316557	0.104977	-0.0946011	-0.167637	-0.182027	0.00852027	-0.00373996	0.0635186	0.0768476	0.0570553	0.112375	-0.0420894	0.0247353	-0.102241	0.0209914	0.0651352	0.00278691	-0.0712241	0.147362	-0.116005	0.410798	0.0117024	0.0362727
PC (19:0/20:3)	0.161856	0.0215183	-0.134843	0.0699262	0.316006	-0.287296	-0.420074	-0.197621	0.305087	0.328772	0.437773	0.348596	0.331837	0.43095	0.264728	0.00482861	-0.104037	0.331027	-0.0330417	0.444904	-0.248834	-0.0729898	-0.517392	-0.270343	0.139082	0.104589	-0.0218913	-0.155671	-0.234616	0.310129	0.348149	0.162419	-0.455806	-0.317981	0.0446596	-0.196544	-0.114657	0.495999	-0.282017	-0.493892	0.274584	0.00867866	-0.35044	0.45491	-0.259613	0.0591419	-0.43786	0.271986	0.0260095
Hexanoylcarnitine	0.134493	-0.0558209	0.000344952	-0.209843	-0.175719	-0.0450873	-0.216077	0.328397	0.252753	0.343456	0.371042	0.60509	0.117745	-0.119148	0.0718098	0.339351	-0.163961	0.608348	-0.0405682	0.37149	0.0534734	-0.0645631	-0.0452437	-0.49429	0.404497	-0.56054	-0.0711986	-0.10719	-0.118035	0.108076	0.610074	-0.0203151	-0.26293	0.175479	-0.0304928	-0.0968583	-0.25405	-0.0500994	0.100775	-0.109426	0.119105	0.063008	0.187794	0.338719	0.27113	-0.0179314	0.090456	0.123245	-0.324041
7-methyl-3-nitroimidazo[1,2-a]pyridine	-0.171806	0.106457	0.1332	-0.375423	-0.157291	0.431184	-0.0348369	-0.0336323	-0.0898499	-0.133661	-0.136781	-0.024145	-0.0907055	0.0966624	-0.020639	-0.0378105	-0.298678	0.0271734	-0.0124804	-0.161519	0.190866	0.112378	0.469721	0.292257	-0.0122553	-0.138	-0.123466	-0.310589	0.123866	-0.0586858	-0.0161692	-0.259912	0.170581	0.270815	0.126032	-0.279268	0.0975386	-0.0477542	0.384815	0.449498	-0.0778044	0.107182	0.461076	-0.118491	0.0928872	-0.261052	0.0596862	-0.239843	0.209672
5α-Pregnan-3,20-dione	0.282905	-0.598806	0.484663	0.460889	-0.83367	0.249722	0.0893868	-0.346785	-0.300756	-0.286095	0.45995	0.225618	-0.205537	0.258209	-0.16349	-0.208549	-0.469354	0.123809	0.109246	0.446593	-0.215321	-0.46459	-0.0634262	-0.500044	0.41513	-0.418881	-0.21459	0.121712	-0.42781	-0.0670888	0.213159	0.17165	-0.206919	-0.529208	-0.251429	0.137893	-0.552867	0.126923	-0.0716418	-0.00824486	-0.321168	-0.206087	-0.0705927	0.456018	0.334593	0.0517007	-0.155814	0.508171	-0.398804
LPC 17:2	0.105038	-0.54012	0.496845	0.181919	-0.442689	0.236532	-0.0283315	0.219874	0.159337	-0.317362	0.0465234	-0.152376	-0.147811	0.225085	-0.0721796	0.101316	-0.717219	-0.231266	-0.0674627	0.0280589	-0.438026	-0.318181	-0.340826	-0.13432	-0.265477	-0.176992	-0.28178	0.0562311	0.0974924	0.0247012	-0.162213	-0.228947	-0.477818	0.0419481	-0.238594	0.082189	-0.363674	-0.0949082	-0.385404	-0.378858	-0.129863	-0.20978	-0.354744	0.0493296	-0.392747	0.107389	-0.484612	0.135096	-0.257106
Histamine	-0.281238	0.340821	-0.0962818	-0.276262	0.202594	0.0177743	-0.0572083	0.0819664	0.090744	0.455758	-0.304565	-0.0978008	0.403119	-0.569582	0.388946	-0.135991	0.197102	-0.0527837	-0.428599	-0.296998	0.377871	0.0709038	0.3581	-0.0309491	-0.0754814	0.00039308	-0.106117	-0.0808143	-0.183059	0.0431726	-0.0876127	-0.122853	0.444732	0.0320771	0.250319	-0.044901	0.278331	-0.10554	0.314082	0.219402	0.122158	-0.0479919	0.352664	-0.320591	0.0980181	0.154601	0.45256	-0.141323	0.237447
cis-gondoic acid	0.301619	-0.139274	-0.115276	0.195131	-0.138392	-0.00367359	-0.214913	0.000295266	-0.0601397	0.178011	0.222216	0.203941	-0.050151	-0.0349395	-0.0572033	-0.0469938	0.118941	0.175186	-0.0921455	0.247011	0.227868	-0.24841	0.237033	-0.371647	0.489299	-0.515566	-0.185281	0.0430303	-0.282354	0.0770156	0.204765	0.350242	0.123695	-0.185102	-0.0333624	0.00463157	-0.038864	-0.135405	0.403314	0.320099	0.062557	-0.11289	0.43053	0.20554	0.485012	-0.210682	0.258975	0.254672	-0.290028
PC (14:1e/6:0)	0.0342299	-0.369882	0.458777	-0.164387	-0.44587	0.379071	0.30572	0.17179	-0.030558	-0.406572	-0.356146	-0.320512	-0.2443	-0.254811	-0.186297	-0.0157197	-0.376305	-0.332778	-0.00661104	-0.370213	0.0179868	-0.313159	0.361791	0.136495	-0.319662	-0.149746	-0.236652	0.0901022	0.192853	-0.109608	-0.321819	-0.208592	0.208583	0.215412	-0.0922828	0.133565	-0.0068144	-0.45097	0.223628	0.396081	-0.193607	-0.109604	0.299147	-0.356806	-0.108192	-0.00732968	-0.129978	-0.16752	-0.0931562
15-Deoxy-螖12,14-prostaglandin A1	-0.450501	0.247277	0.111967	0.391332	-0.111186	-0.0997265	-0.0325947	-0.250858	-0.283317	-0.0332432	-0.144177	-0.190759	0.0285844	0.00758607	-0.00655309	-0.0345586	0.0695091	-0.189583	-0.293393	-0.144291	0.177622	0.042001	0.153943	0.00534407	-0.0783872	-0.0952947	0.103759	0.403106	-0.0500614	-0.0806736	-0.191593	-0.303599	0.33937	-0.248363	0.144581	0.438081	-0.207413	0.180476	-0.0184557	-0.0359542	-0.0283512	-0.181254	-0.32888	-0.157793	0.252437	0.0721278	0.107142	-0.0402766	-0.051033
LPC 18:4	0.104514	-0.681079	0.720955	0.135603	-0.790192	0.530869	0.277785	-0.275888	-0.103807	-0.378298	0.0190765	-0.0239529	-0.361749	0.00820251	-0.363387	-0.263723	-0.251989	-0.0986272	0.12611	0.0088949	-0.0513996	-0.499692	0.271826	-0.172205	0.111994	-0.378097	-0.126788	0.287666	-0.237849	0.1855	-0.0314712	-0.062176	0.137983	-0.356558	-0.215569	0.309176	-0.319227	-0.354711	0.118726	0.226579	-0.0699533	-0.304228	0.23278	-0.000966658	0.37857	-0.112683	0.00413956	0.143479	-0.232468
4-oxo-5-phenylpentanoic acid	0.0894734	0.268965	-0.338276	-0.0573181	0.132542	-0.429997	0.121714	0.00975246	0.02078	0.403124	-0.0243462	0.157672	0.265972	-0.124417	0.125111	0.216461	0.612973	0.202421	0.203812	0.000598904	0.245675	0.158446	0.141613	-0.232494	0.144649	-0.246486	0.355545	0.393545	-0.0484835	-0.0750146	0.159096	-0.142567	0.204034	0.0511027	0.0235171	0.356441	-0.0992812	-0.278585	0.276453	0.0746435	0.28616	0.221372	0.281957	-0.0333382	0.263239	-0.0152347	-0.00370633	-0.0690478	-0.104128
Docosanamide	0.076346	-0.195009	0.143759	-0.193713	-0.130089	0.0119887	0.470113	-0.0515927	0.0366709	-0.115017	-0.0271959	0.127202	-0.135273	0.0494143	-0.235494	0.119143	0.388543	0.110681	0.527689	-0.0318779	-0.183485	0.0428859	-0.125715	0.185516	-0.103846	-0.14681	0.194163	0.279336	0.306075	0.0869063	0.121553	0.0429898	-0.0347721	-0.0105076	-0.247144	0.246173	-0.226834	-0.389896	-0.175718	-0.0649565	0.299097	0.0910261	-0.0254439	-0.0320114	0.00949918	0.132978	-0.116368	-0.27994	-0.0923659
Levothyroxine	-0.117777	-0.429385	0.601751	-0.316026	-0.328895	0.463666	0.610377	-0.089743	-0.236594	-0.365811	-0.222512	-0.0668902	-0.0912462	-0.360396	-0.0479459	-0.267934	-0.155418	-0.0990328	0.187805	-0.241896	-0.0886074	-0.434468	0.217698	0.130919	-0.275451	-0.00258161	-0.201966	0.0852232	0.105828	-0.111262	-0.0697609	0.216655	0.275552	-0.0370798	-0.179938	0.137898	0.052765	-0.387568	-0.0349735	0.277336	-0.179515	-0.0220374	0.149594	-0.243356	-0.179592	0.331919	-0.115031	-0.22903	0.140448
PC (16:1e/22:5)	-0.0212084	0.565467	-0.617125	0.0344841	0.315136	-0.480197	-0.0677237	0.298064	0.0677063	0.192771	-0.153761	-0.229682	0.0676907	-0.129141	0.00301157	0.565209	0.3644	-0.19112	0.0609456	-0.149897	0.112605	0.594449	-0.0157998	-0.0811294	-0.0237718	0.10296	0.349031	-0.109531	0.101942	-0.125338	-0.22864	0.0992626	0.0976789	-0.0384309	0.122357	-0.131548	-0.0397453	0.174943	0.046265	0.20249	-0.00330471	0.0686691	-0.236128	-0.125959	-0.0177983	0.185304	0.487729	-0.196499	-0.128158
1-(2-furyl)-3,3-di(methylthio)prop-2-en-1-one	-0.17309	0.0218438	0.0308692	-0.0496345	0.322965	-0.180385	-0.0812979	-0.12027	0.587477	0.50649	-0.0764301	0.00369861	0.335387	-0.106136	0.208197	0.25734	0.224685	-0.00346838	-0.0267255	-0.0576266	-0.222979	0.194774	-0.287588	0.1088	-0.13283	-0.0357724	0.4324	-0.0786111	0.211388	0.69431	0.00134844	-0.180476	-0.13173	-0.0196494	-0.167836	-0.0929149	-0.175683	-0.203081	-0.271695	-0.30801	0.659587	0.145573	-0.384706	-0.0861088	0.0656006	0.0533586	-0.0532443	-0.136625	0.0835559
PC (18:3e/2:0)	0.494664	-0.0301174	-0.285106	0.219247	-0.0129169	-0.506353	-0.0841245	0.0724553	-0.0721256	-0.0320038	0.386759	0.284675	-0.0759421	-0.0361577	-0.136091	-0.0915378	0.270959	0.332494	0.157631	0.389083	0.39552	-0.330732	-0.076931	-0.506693	0.38093	0.00706778	-0.199815	0.226111	-0.271854	-0.189736	0.293539	0.150388	-0.021742	0.0518218	0.352528	0.184845	0.165334	0.246363	0.283278	-0.199489	0.000716843	-0.0889017	0.173896	0.395592	0.069473	-0.127383	-0.140336	0.401372	-0.366085
Lysopc 20:0	-0.371346	0.221711	0.193601	-0.360561	0.0605224	0.0685384	0.0331343	0.0997489	0.126072	0.0577124	-0.383771	-0.173655	0.195905	-0.320499	0.108501	0.150064	0.0765442	-0.0612517	-0.158422	-0.388898	0.596296	-0.298575	0.595375	-0.015279	-0.290611	-0.330269	-0.223708	0.0151524	0.140023	0.128647	-0.152377	-0.159126	0.570549	0.165103	0.558164	0.0382838	0.268949	-0.165135	0.633808	0.466997	0.348857	-0.0669085	0.334592	-0.382239	-0.118131	0.129476	-0.0998593	-0.400919	0.112922
[4-(7-chloroquinolin-4-yl)piperazino](phenyl)methanone	-0.0252297	-0.0638348	0.20152	-0.110783	-0.429366	0.373214	0.151798	-0.0579011	-0.242714	-0.378725	-0.158256	0.0447036	-0.513008	-0.0338269	-0.547779	-0.215303	0.197063	0.0480025	0.0240528	-0.158557	0.297507	-0.068705	0.53342	0.12217	0.108746	-0.120913	-0.0947711	0.379234	-0.190267	-0.134892	0.0477327	-0.105731	0.426164	-0.200847	0.0931751	0.381209	0.0562849	-0.161442	0.372332	0.471812	-0.211463	-0.329556	0.552367	-0.18249	0.473505	-0.26723	0.447399	-0.106833	-0.0964715
Palmitoylcarnitine	0.122182	-0.16454	0.141296	0.211865	-0.231281	0.0372492	-0.112433	-0.210743	-0.291877	-0.228433	0.519257	0.566682	-0.0953921	0.0480918	-0.025761	-0.269917	-0.448951	0.565022	-0.175116	0.522954	-0.0150714	-0.481254	-0.0855365	-0.102325	0.365061	-0.055205	-0.47787	-0.289795	-0.115074	-0.228493	0.5718	0.44457	-0.173246	-0.0502397	0.113705	-0.262375	0.0662233	0.538433	0.0259454	0.0171268	-0.435322	0.0600557	-0.0591526	0.499862	0.110883	0.0919747	-0.332316	0.450073	-0.10842
PC (20:5e/22:0)	-0.159069	0.41099	-0.412829	0.0207293	0.46484	-0.402258	-0.309659	0.390733	0.338821	0.33695	-0.120111	-0.121588	0.239307	0.0577654	0.180807	0.438151	0.178157	-0.0657986	-0.130714	-0.0988604	0.0235347	0.364619	-0.233458	-0.159421	-0.18435	0.172913	0.360757	0.0479264	0.0141181	0.0129854	-0.11695	-0.293201	-0.216888	0.235851	0.190407	0.0300333	0.102839	0.0875449	-0.135047	-0.370664	0.130117	0.111882	-0.274963	-0.123351	-0.275829	0.0122463	-0.0642581	-0.0522093	0.0812469
DL-Lysine	0.375481	-0.445448	0.394151	-0.0686771	-0.411852	0.190361	0.148541	-0.270482	-0.20831	-0.389968	0.125976	0.0375777	-0.247729	-0.0982292	-0.215225	-0.41623	-0.302442	0.0155986	0.110256	0.0929484	0.206764	-0.552594	0.313124	-0.185613	0.167053	0.00851556	-0.352749	0.127364	-0.224562	-0.0110606	0.0377795	0.0228693	0.271989	-0.125297	0.0310374	0.154246	0.0194905	0.0024282	0.343703	0.301023	-0.148438	-0.231564	0.393204	0.145216	0.129511	-0.243729	-0.116577	0.176665	-0.209413
7-(2-thienyl)-5-(trifluoromethyl)[1,2,4]triazolo[1,5-a]pyrimidine	0.249792	-0.292067	0.211337	-0.203444	-0.0430759	0.0795654	0.221239	-0.148074	-0.145853	-0.0226222	-0.00679565	0.0119095	0.190789	-0.249375	0.244792	-0.210758	-0.288662	-0.0461964	0.0243638	-0.0169635	-0.154268	-0.362844	0.0922685	-0.0806252	-0.0498184	0.00375169	-0.227591	-0.0504641	-0.020612	-0.0689804	0.00394011	0.305045	0.154809	-0.100895	-0.300264	-0.0214178	-0.0381198	-0.16266	0.0595804	0.317047	-0.130607	0.07305	0.191672	0.00259908	-0.163279	0.159744	-0.232077	0.0047465	-0.00402544
Hexadecanamide	-0.121608	0.213004	-0.105463	-0.0499066	-0.0389533	0.0163655	0.176921	0.0330777	0.0781762	-0.112959	-0.501337	-0.640004	-0.0408474	-0.0391041	-0.1138	0.0868495	0.416702	-0.538448	0.199659	-0.495451	0.457118	0.124348	0.47545	-0.0437559	-0.30082	0.19789	0.281505	0.102346	-0.201643	-0.0438099	-0.62911	-0.268775	0.401941	-0.0746118	0.489853	0.0755653	0.325538	-0.184608	0.508528	0.383393	0.0606623	-0.0647001	0.327684	-0.466615	-0.141219	-0.0259453	0.129117	-0.171057	0.243941
PC (17:1/17:1)	0.244959	-0.586728	0.491605	0.0490141	-0.607052	0.559658	0.0265928	-0.168902	0.0478408	-0.428308	0.111391	-0.0406891	-0.582976	0.0579297	-0.543713	-0.277246	-0.270888	-0.0906423	0.144944	0.0889268	0.0401455	-0.251797	0.248918	-0.147842	0.293508	-0.0197578	-0.0253066	-0.0411851	-0.361651	0.317944	-0.0435074	-0.0527736	0.027548	-0.246523	-0.0819577	-0.0277875	-0.0581701	-0.115142	0.150332	0.200881	-0.151441	-0.359289	0.291361	0.10828	0.440988	-0.446008	0.383489	0.231747	-0.170292
PE (16:0e/20:5)	-0.101695	0.436712	-0.477371	-0.0953983	0.481868	-0.559268	0.0791995	0.448177	0.292158	0.264786	-0.250797	-0.192519	0.246155	-0.0707429	0.118457	0.599559	0.565587	-0.117121	0.198032	-0.234279	0.0886964	0.332532	-0.225805	0.0453848	-0.357132	-0.0581225	0.223483	0.116259	0.435286	-0.0356947	-0.185565	-0.0245246	-0.0529337	0.283699	0.212807	0.0615067	0.0643234	-0.161872	-0.0558288	-0.197337	0.440677	0.172542	-0.28003	-0.2362	-0.427075	0.340105	-0.125428	-0.377607	-0.0419822
(5E)-7-methylidene-10-oxo-4-(propan-2-yl)undec-5-enoic acid	0.0519888	0.027909	-0.169548	-0.302415	-0.00480946	0.252802	0.171357	0.299862	-0.14975	0.127583	-0.0960715	-0.0315871	-0.0828914	-0.204075	-0.0146203	-0.0236936	0.334415	-0.0348617	0.225234	-0.108876	0.192735	0.280746	0.245424	-0.074357	0.223411	-0.188725	0.0847012	-0.0270595	-0.0703582	-0.144722	-0.0316652	0.080425	0.139421	0.22886	-0.128364	-0.0371717	0.120368	-0.464101	0.161598	0.167886	0.0129237	0.0420179	0.516201	-0.106932	0.228739	-0.14717	0.676356	-0.205312	0.0555073
21-Deoxycortisol	0.0207924	-0.120847	0.214024	-0.101924	0.03969	-0.102656	-0.161118	-0.00821734	0.318645	0.344602	-0.0868171	0.0617857	0.332901	-0.2447	0.244507	-0.039264	-0.0103856	0.0805698	-0.2926	-0.0739911	0.272394	-0.469273	0.195371	-0.169805	-0.0730248	-0.459855	-0.306022	0.206152	0.0384633	0.358677	0.070127	-0.207954	0.23229	0.0883331	0.150995	0.203957	-0.00682287	-0.289492	0.361775	0.0303045	0.546406	-0.11288	0.276784	-0.0985648	0.0433894	-0.0421679	-0.313591	-0.0372737	-0.143347
PE (14:0e/24:4)	0.373812	-0.526274	0.174927	0.512106	-0.476639	0.131309	0.068812	-0.28246	-0.307513	-0.182906	0.540407	0.387511	-0.203897	0.119035	-0.13609	-0.31085	-0.156807	0.325504	0.116685	0.563605	-0.119324	-0.516246	-0.106621	-0.325827	0.569938	-0.300686	-0.232225	-0.109702	-0.30427	-0.107045	0.381664	0.598123	-0.238285	-0.255729	-0.18436	-0.130336	-0.107995	0.077675	0.0208952	0.0294379	-0.330347	0.0500132	0.072224	0.514914	0.392103	-0.0107904	-0.161799	0.625819	-0.235679
PC (18:1e/6:0)	0.152627	-0.516959	0.479164	0.0470246	-0.409805	0.47504	0.246534	-0.323658	-0.0158914	-0.365899	-0.152197	-0.2608	-0.323826	-0.104816	-0.28446	-0.44923	-0.108814	-0.304974	0.0437936	-0.161628	0.00954828	-0.386136	0.258289	0.309864	-0.0585718	-0.0342851	-0.320885	-0.0700798	0.0302374	0.281776	-0.262968	0.123764	0.241517	-0.203873	-0.0875738	-0.0717322	0.0739908	-0.275202	0.183487	0.344341	0.0752418	-0.257702	0.272599	-0.140825	0.173444	-0.128253	0.0924147	0.0234982	-0.0073772
Isoquinoline	-0.0835687	-0.227493	0.243969	0.101811	-0.204081	0.370878	0.381072	-0.482857	-0.446783	-0.169645	-0.0148598	-0.0902496	0.00677322	-0.192353	0.0763148	-0.539055	0.148131	-0.0666171	0.172717	-0.00318968	0.260367	-0.397105	0.434151	-0.0697574	0.20259	0.107906	0.01859	-0.176397	-0.367936	-0.128005	-0.0861939	0.470972	0.395467	-0.229088	0.123484	-0.162029	0.373841	-0.0998804	0.351888	0.462306	-0.295415	0.16751	0.373015	-0.0264145	0.219868	0.0660277	0.0448083	0.212059	0.39002
PC (22:3e/17:0)	0.237942	-0.372108	0.274982	0.0542823	-0.356188	0.197942	0.103281	-0.188241	0.0904818	-0.163645	-0.0824172	-0.289326	-0.290609	0.137099	-0.309733	-0.0901752	-0.0114572	-0.36246	0.244253	-0.110207	-0.106004	0.0805736	0.0747506	-0.0609199	0.0473029	-0.0215496	0.24236	0.305147	-0.135754	0.315749	-0.302274	-0.374012	0.062786	-0.237257	-0.305142	0.299518	-0.351378	-0.311826	-0.0385226	0.00798872	0.181286	-0.274855	0.0872873	-0.0591118	0.281574	-0.378132	0.262891	-0.0236407	-0.22157
Gramine	-0.327483	0.462764	-0.309011	-0.0759442	0.51284	-0.307118	-0.0245009	-0.0285083	-0.057306	0.681948	-0.154811	-0.101359	0.868498	-0.244256	0.88052	-0.0193522	0.2215	-0.0492074	-0.260759	-0.138598	0.161689	0.069911	-0.00859032	-0.03415	-0.176354	-0.137347	-0.0821541	-0.16675	0.0818307	-0.140485	-0.0949542	0.0605974	0.160251	0.162179	0.167862	-0.162583	0.157414	-0.0445494	0.0921234	-0.0882262	0.299546	0.361351	-0.00981491	-0.147164	-0.32569	0.45044	-0.235876	-0.135407	0.371661
PC (14:0e/10:0)	0.30638	-0.12443	0.0193401	-0.0241187	-0.254289	0.148071	-0.00354338	-0.0756611	-0.181303	-0.221203	-0.0921299	-0.185511	-0.166057	0.0315913	-0.134112	-0.14414	-0.112613	-0.178415	0.0302186	-0.0947446	0.279102	-0.257408	0.49818	-0.0794226	0.101792	-0.188477	-0.277329	0.00862534	-0.157265	-0.142101	-0.18318	0.100768	0.32005	-0.100467	0.0991531	-0.00670812	0.0969931	-0.111176	0.591816	0.642956	-0.147716	-0.119959	0.595156	-0.0629084	0.123771	-0.233331	0.00631693	0.0508263	-0.116415
ACar 18:4	-0.0559696	-0.0929166	0.19899	0.0309452	-0.0916191	0.276155	-0.433352	-0.0700257	0.173215	-0.207164	0.192318	0.272822	-0.306731	0.415271	-0.336358	-0.130277	-0.292672	0.245013	-0.271632	0.203572	-0.148001	-0.133406	-0.104418	-0.015726	0.0589416	0.146114	-0.162795	0.0208273	-0.344066	0.200879	0.275066	0.0224735	-0.224324	-0.414968	0.119733	0.0125805	0.0255009	0.452367	-0.142487	-0.127644	-0.175887	-0.381504	-0.0764671	0.169879	0.0302999	-0.183089	-0.0192869	0.19219	0.0210793
PE (18:0e/18:3)	0.159876	-0.207947	0.0951615	0.168938	-0.388547	-0.0656782	0.535936	-0.161409	-0.302171	-0.179118	0.0464229	-0.11903	-0.0976855	-0.0882428	-0.128758	-0.100177	0.347914	-0.143546	0.493257	0.0283172	0.0226981	-0.0189849	-0.0292177	-0.29009	0.103549	0.0313374	0.222855	0.319967	-0.215455	-0.218524	-0.127062	0.0725747	0.0985815	-0.268649	-0.094697	0.313894	-0.214817	-0.170812	-0.0823319	-0.0662736	-0.103563	-0.0268701	-0.0419851	0.0566419	0.0987281	0.220796	0.155466	0.0858695	-0.139808
PC (18:0e/14:1)	-0.269878	0.256384	-0.0465907	-0.00209854	0.0824974	-0.303586	0.216461	0.2414	0.197399	-0.285233	-0.312162	-0.172125	-0.306054	-0.21266	-0.447025	0.433532	0.392476	-0.061081	0.152387	-0.308603	0.305312	0.117821	0.0908173	0.289216	-0.344934	0.119882	0.256499	0.232719	0.502371	0.0526619	-0.158646	-0.312674	0.215307	0.371346	0.404973	0.231589	0.165664	-0.0577329	0.0957897	-0.0172163	0.207071	0.0007788	-0.291998	-0.319655	-0.0393949	0.041125	-0.0369128	-0.333151	-0.123298
N,N-Dimethylsphingosine	-0.0893139	0.355319	-0.314927	-0.0980121	0.218212	-0.243149	0.0923416	0.157066	-0.0318152	0.250826	-0.35322	-0.223688	0.343265	-0.148994	0.303504	0.297815	0.230312	-0.16783	-0.0484645	-0.320997	0.155199	0.113784	0.299924	0.0783302	-0.24765	-0.214171	0.0953241	0.0638469	0.209731	-0.264181	-0.220566	-0.0177428	0.264468	0.189575	0.0650246	0.046504	0.0852074	-0.289543	0.373524	0.448093	0.0476583	0.302188	0.273217	-0.345245	-0.143159	0.18677	-0.223955	-0.235773	0.111259
SM (d14:0/20:0)	0.0452618	0.442284	-0.522204	-0.15632	0.413337	-0.526392	0.0652116	0.298643	0.062462	0.136712	-0.152265	-0.0241116	0.0795073	0.0101551	-0.0673457	0.442594	0.651846	0.0633719	0.318274	-0.128525	0.271973	0.257647	0.0708655	-0.228029	-0.0969852	0.120717	0.450923	0.362691	-0.00779296	-0.224483	-0.017398	-0.010676	0.144741	0.107576	0.250553	0.310832	0.182411	-0.0752094	0.211629	0.0708681	0.102625	0.167578	0.10151	-0.149928	-0.165523	0.0342207	-0.0563931	-0.210283	-0.00222156
Epitestosterone	-0.331335	-0.0787507	0.391458	0.1882	-0.51752	0.502897	0.0140045	-0.285042	-0.325679	-0.258786	-0.179196	-0.255674	-0.314184	0.201723	-0.296627	-0.302438	0.0350919	-0.258408	-0.0836425	-0.196573	0.359738	-0.0566628	0.544667	0.008091	0.102998	-0.323203	-0.0224391	0.374288	-0.279678	0.0180348	-0.25374	-0.419048	0.423036	-0.261867	0.166638	0.392553	-0.128404	-0.147159	0.323532	0.230146	-0.0056438	-0.362724	0.31737	-0.187968	0.505352	-0.333599	0.378178	-0.067827	0.0120908
PC (18:4/20:5)	0.104324	-0.0404966	0.0452925	-0.287497	0.0588669	-0.0151837	0.0377763	0.0378233	0.437488	0.182166	-0.220971	-0.143574	0.0210836	-0.0785742	-0.0942405	0.0069064	0.283604	-0.180461	0.0534955	-0.230694	-0.128023	0.230431	-0.128775	0.097096	-0.232115	0.165036	0.128311	0.249683	-0.0461511	0.39893	-0.148718	-0.311918	0.0268351	-0.241577	-0.125985	0.22625	-0.14101	-0.22055	-0.169986	-0.180029	0.42925	-0.295406	0.0367822	-0.208538	-0.0571794	-0.0164089	0.287892	-0.227342	-0.0447131
11-Hydroxy-δ(9)-THC	-0.33228	0.365125	-0.0617197	0.106362	-0.0266188	0.0521108	0.0247774	-0.170502	-0.395303	-0.284681	-0.266194	-0.258442	-0.209696	0.255833	-0.241037	-0.196962	0.318672	-0.219057	-0.0675757	-0.271696	0.321435	0.15439	0.3244	0.234861	-0.17493	0.132361	-0.0231534	0.460152	-0.0971201	-0.309241	-0.253917	-0.246105	0.423737	-0.245174	0.329727	0.451155	0.106276	0.188506	0.179045	0.151948	-0.116012	-0.273236	0.0977897	-0.258554	0.0554237	-0.0779121	0.173234	-0.215322	0.13348
PC (16:0/17:2)	0.198671	-0.0733181	-0.104622	0.0507284	0.122231	-0.0405016	-0.29501	-0.109606	0.0163582	0.420199	0.408782	0.302335	0.46977	0.167298	0.558007	-0.148964	-0.349862	0.246173	-0.187534	0.406719	-0.256562	-0.121073	-0.33558	-0.167245	0.258714	-0.270719	-0.40411	-0.435547	-0.0794622	0.0533535	0.298069	0.34024	-0.376617	-0.0806469	-0.188	-0.447761	-0.1647	0.218011	-0.149131	-0.215645	0.118251	0.143131	-0.0467209	0.425792	-0.146554	0.168784	-0.244518	0.258537	0.00532243
Wogonin	0.187603	-0.00480085	-0.0643456	-0.0463457	0.0771219	-0.203488	-0.0569277	0.0993832	0.0162597	0.0374236	-0.107222	-0.0546698	-0.0109508	0.25731	-0.12052	-0.0348265	0.36059	-0.0923731	0.0675514	-0.102794	0.0468674	-0.0743417	-0.0404103	-0.183049	-0.152189	-0.135924	-0.0702605	0.794826	-0.144816	-0.0536571	-0.0601919	-0.21994	0.110145	-0.262481	-0.04744	0.739836	-0.166591	-0.211076	0.00680068	-0.188774	0.288293	-0.357771	0.189212	-0.105776	-0.133718	-0.100873	-0.123314	-0.153093	-0.219793
1-(4-benzoylpiperidino)-2-[(4-chlorophenyl)thio]ethan-1-one	-0.376801	0.284535	-0.0399548	-0.292024	-0.1381	0.47887	-0.0558167	0.117797	0.0900918	-0.0135922	-0.162933	-0.107451	-0.0923414	0.125671	-0.0434538	0.136028	-0.0487663	-0.0153767	0.0532025	-0.173234	0.19883	0.438439	0.336162	0.22721	0.00418378	-0.00178643	0.146418	-0.574773	-0.0460832	-0.00547828	-0.094039	-0.213024	-0.0342678	0.197803	0.337851	-0.562594	0.224006	0.0569515	0.257146	0.265816	-0.109765	0.150055	0.28898	-0.151668	0.0727442	-0.0841459	0.382466	-0.175091	0.407162
ACar 20:3	0.320054	-0.543759	0.376406	0.0289842	-0.256442	0.175395	-0.248766	-0.0352935	0.539923	-0.0163868	0.302151	0.380733	-0.340151	-0.0476114	-0.42135	-0.0629224	-0.178515	0.298648	-0.132593	0.306675	-0.213195	-0.323615	-0.245274	-0.0781382	0.255533	-0.195076	-0.214121	-0.0234916	-0.0807427	0.726834	0.378129	0.105224	-0.249554	-0.273006	-0.198908	-0.0403211	-0.210068	-0.0221327	-0.173271	-0.20406	0.337651	-0.419992	-0.0758061	0.273485	0.371753	-0.233809	0.197671	0.226279	-0.409719
Pipecolinic Acid	-0.217003	-0.3358	0.617942	-0.300777	-0.444638	0.657107	0.363088	-0.187165	-0.303561	-0.387962	-0.134602	0.0385914	-0.137757	-0.0541142	-0.0620729	-0.367775	-0.337537	0.0386094	0.0671683	-0.152911	0.0347668	-0.405482	0.400524	0.164186	-0.14185	-0.103036	-0.266878	0.00230852	-0.040617	-0.173971	0.0410853	-0.013709	0.225821	0.0135721	-0.0132263	0.0563673	0.0908723	-0.223448	0.169923	0.334214	-0.278724	-0.00402295	0.385379	-0.153787	-0.0393159	0.0627363	-0.20792	-0.128271	0.257105
SM (d14:1/25:1)	-0.103922	0.0690466	0.0776767	-0.0237559	0.246956	-0.412559	0.14769	0.0982244	0.147996	-0.123049	-0.153556	-0.0896863	-0.0262732	-0.243883	-0.157397	0.0954301	0.285046	-0.0660504	0.0178618	-0.165157	0.116293	-0.159617	-0.213478	-0.0172194	-0.359417	0.282592	0.0219739	0.480364	0.197228	0.115697	-0.0854495	-0.137697	0.185369	-0.0119637	0.213162	0.487624	0.0579144	0.0784356	-0.219985	-0.368099	0.279352	-0.249968	-0.454942	-0.159633	-0.303519	0.216953	-0.140589	-0.212629	-0.165625
Tau-Methylhistidine	-0.455314	0.187177	0.222293	-0.285574	0.167528	-0.0434154	0.301384	-0.317348	0.063833	0.395723	-0.288369	-0.0714035	0.626019	-0.2439	0.513542	-0.175573	0.372068	0.011004	0.0142946	-0.285471	0.296262	-0.181898	0.221474	0.0599817	-0.333387	-0.0983483	0.0732128	0.183601	0.0399831	0.148113	-0.0603523	-0.289656	0.395094	0.0250279	0.30229	0.199618	0.122899	-0.24892	0.208254	-0.0594096	0.527647	0.205094	0.127418	-0.291866	-0.188475	0.338626	-0.39341	-0.287528	0.421009
N-[2-chloro-6-(trifluoromethoxy)phenyl]-2,2-dimethylpropanamide	0.507307	0.0150014	-0.404165	0.427071	0.113023	-0.390215	-0.331658	-0.114841	-0.330376	-0.120559	0.501795	0.201783	-0.0482956	0.617252	0.0233316	-0.238454	-0.177995	0.131023	0.0192203	0.502465	-0.314888	0.0349534	-0.52024	-0.275835	0.27092	0.374601	-0.124976	0.209629	-0.374097	-0.460039	0.188032	0.16895	-0.47078	-0.291947	-0.166106	0.167307	-0.137334	0.611806	-0.348426	-0.450956	-0.454546	-0.078105	-0.217728	0.530299	-0.219443	-0.150008	-0.342187	0.51878	-0.179059
PE (19:2/19:2)	0.0967642	-0.193309	0.126271	0.104438	-0.0604147	0.177799	-0.372387	-0.0186269	-0.0188743	0.0549508	0.373222	0.263071	0.00762921	-0.108621	0.123946	-0.213755	-0.502729	0.246446	-0.328938	0.361526	0.123988	-0.344805	0.0239209	-0.288332	0.418106	-0.14634	-0.399963	-0.466589	-0.234576	0.148044	0.269287	0.289393	-0.102605	0.0451607	0.10083	-0.432319	0.127914	0.30672	0.118416	-0.000767051	-0.139048	-0.0879757	0.0522628	0.363294	0.18224	-0.153909	0.139479	0.35768	-0.0856895
Proline-hydroxyproline	-0.219755	-0.0972986	0.336405	-0.367577	-0.0462377	0.641394	-0.117884	-0.141096	-0.000492878	-0.175464	-0.234575	0.0140332	-0.244054	0.0247567	-0.194347	-0.252661	-0.246963	0.0109247	-0.229071	-0.232109	0.0777915	-0.1084	0.518442	0.43643	-0.0556758	-0.0732296	-0.150482	-0.127265	0.048597	0.217884	0.0181977	-0.0560439	0.313689	0.0282297	-0.0540323	-0.102025	0.219387	-0.192751	0.306547	0.549296	-0.0408917	-0.102542	0.510099	-0.255949	0.252411	-0.386438	0.166211	-0.247452	0.2711
Cholest-4-en-3-one	0.369478	-0.102375	-0.071798	-0.166891	0.0669682	-0.0908201	0.0168061	0.0557307	0.0256693	-0.103305	-0.137574	-0.0406345	-0.138209	-0.146001	-0.18199	0.0550655	0.0426824	-0.0710393	0.012289	-0.124342	0.0420366	-0.199963	0.266516	0.009718	-0.0282493	-0.0731875	-0.128381	0.182786	0.0556515	0.019203	-0.0443048	0.257859	0.29544	-0.12061	-0.163861	0.159818	0.0403243	-0.210881	0.322855	0.565319	-0.0077851	-0.11444	0.370271	-0.130375	0.0558603	-0.134093	0.00645871	-0.111436	-0.224015
PC (14:1e/8:0)	-0.0867967	-0.101516	0.285673	-0.292232	-0.289954	0.448068	0.136227	0.18501	-0.0873823	-0.52637	-0.332472	-0.159297	-0.420722	-0.156154	-0.369744	-0.037409	-0.2838	-0.0967293	-0.0589202	-0.336364	0.284165	-0.252306	0.596247	0.292931	-0.219296	-0.00885571	-0.26508	-0.0884585	0.154041	-0.194909	-0.147855	-0.105419	0.322326	0.307887	0.245258	-0.054193	0.351746	-0.182654	0.496601	0.633582	-0.34057	-0.0707016	0.518766	-0.339648	-0.0186384	-0.188715	-0.0353379	-0.194808	0.0868708
Oxymatrine	-0.228874	-0.078183	0.306066	-0.00149711	-0.543375	0.538839	0.125444	-0.0975817	-0.111405	-0.3193	-0.287634	-0.321577	-0.404638	0.170117	-0.374245	0.0288197	-0.121271	-0.328362	0.0699988	-0.306073	0.0634672	0.249918	0.45411	0.279748	-0.0486361	-0.233974	0.150394	0.0579189	0.0402257	0.038854	-0.32445	-0.448136	0.205098	-0.052206	-0.0624018	0.0787626	-0.226008	-0.268085	0.207139	0.397455	-0.0929932	-0.150034	0.252786	-0.280244	0.394553	-0.288069	0.379622	-0.212775	0.00532602
N1-(2-amino-2-oxoethyl)-2-(isopropylthio)acetamide	-0.390661	0.11968	0.267086	-0.0447918	-0.151624	0.317486	0.0156723	-0.0146274	-0.0917732	-0.61868	-0.311822	-0.253357	-0.503074	0.0656277	-0.511112	-0.00355778	-0.136714	-0.178272	-0.116223	-0.323368	0.296889	-0.096208	0.406553	0.41802	-0.30743	0.184695	-0.152199	-0.0248383	0.186134	-0.0272953	-0.239372	-0.134541	0.339063	0.0229069	0.465151	0.00248481	0.30148	0.232852	0.251421	0.373057	-0.199245	-0.258626	-0.0268534	-0.310779	-0.0425085	-0.0973973	0.0579733	-0.255045	0.121314
SM (d23:1/19:1)	0.000592264	0.141536	-0.161729	-0.178097	0.173495	-0.250254	-0.22052	0.627311	0.568356	0.163113	-0.253921	-0.178381	-0.0001501	0.114739	-0.0884702	0.622836	0.0125639	-0.163793	-0.0208532	-0.250582	-0.153128	0.368753	-0.254563	-0.0405725	-0.381668	-0.0693957	0.266669	0.293193	0.271561	0.135933	-0.17971	-0.653949	-0.328125	0.371414	-0.0444627	0.273412	-0.201094	-0.278715	-0.205765	-0.40535	0.308571	-0.0769644	-0.175921	-0.252807	-0.318142	-0.112501	-0.12074	-0.27336	-0.208506
PC (16:0e/22:5)	-0.43033	0.000803466	0.279219	-0.0307411	0.0437447	0.087583	0.172971	-0.0540677	0.127415	0.320728	-0.188665	-0.218834	0.471154	-0.234359	0.476601	0.0637754	-0.0872066	-0.270411	-0.18822	-0.208099	-0.261484	0.0507299	-0.2719	0.153993	-0.3558	-0.254465	-0.16843	-0.160609	0.301839	0.27274	-0.223509	0.0277578	-0.00848628	-0.15263	-0.157193	-0.127878	-0.311891	-0.136524	-0.423445	-0.273539	0.429292	-0.0445788	-0.534359	-0.184993	-0.285531	0.631593	0.0494112	-0.309196	0.0986099
PE (18:1/18:2)	0.146807	-0.0356671	-0.0152531	0.281629	-0.408943	-0.0445738	0.120499	-0.399824	-0.243789	-0.00376545	0.149391	0.0419548	-0.137162	0.129966	-0.17292	-0.138482	0.232966	0.0417532	0.232144	0.143747	0.19184	0.132044	0.245965	-0.125265	0.404025	-0.178222	0.305603	0.25869	-0.224544	-0.030168	0.0369085	-0.314392	0.170118	-0.140071	-0.0624482	0.25038	-0.288653	-0.0730178	0.256968	0.127654	0.00597647	0.0520487	0.245654	0.160595	0.650747	-0.352229	0.190245	0.20972	-0.177053
Ecgonine	-0.0973295	-0.465386	0.657545	-0.231449	-0.452042	0.542951	0.360442	-0.279346	-0.0889409	-0.253676	-0.117459	0.0556961	-0.123092	-0.120289	-0.119817	-0.214671	-0.239499	0.0343258	0.133777	-0.124123	-0.0229319	-0.445452	0.387025	0.10341	-0.0671379	-0.275704	-0.0810888	0.0615539	0.0304728	0.15236	0.0544766	-0.000843488	0.251826	-0.067971	-0.170834	0.0998398	-0.0846285	-0.406058	0.205035	0.407854	-0.00753637	0.0184649	0.331065	-0.139181	0.178259	-0.0206432	-0.212167	-0.119954	0.0867251
5'-S-Methyl-5'-thioadenosine	0.46352	-0.351404	0.00419096	0.330155	-0.0396942	-0.225559	-0.413405	-0.124998	0.364317	0.182244	0.550389	0.417763	0.108948	0.245363	0.107873	-0.0447622	-0.436717	0.366737	-0.156051	0.573969	-0.376689	-0.299975	-0.530164	-0.283888	0.303952	0.0189582	-0.124089	-0.247285	-0.194009	0.286463	0.412297	0.116244	-0.635182	-0.0859825	-0.169248	-0.269625	-0.169656	0.333715	-0.243124	-0.443275	0.000172266	0.0647843	-0.24952	0.548965	0.000496284	-0.131626	-0.535311	0.634253	-0.226601
Dehydrocholic acid	-0.0715443	0.282871	-0.196118	-0.194416	0.0879146	0.0212441	-0.0849272	0.111323	0.247487	0.143261	-0.317363	-0.170439	-0.0758189	-0.185286	-0.131585	-0.039566	0.321558	-0.132656	-0.180274	-0.308391	0.193653	0.379758	0.209274	0.264703	-0.119727	0.245064	0.133706	0.0771005	-0.0689773	0.106673	-0.165605	-0.404733	0.204854	0.0459108	0.155032	0.069482	0.194368	-0.097187	0.168257	0.0958295	0.0992557	-0.151342	0.3103	-0.317711	0.182316	-0.203954	0.486233	-0.140776	0.11851
SM (d23:1/12:0)	-0.0979861	0.343577	-0.385519	0.0960083	0.267625	-0.369442	-0.0949359	0.264287	0.198867	0.201103	-0.133735	-0.0903237	-0.00442567	0.142486	-0.121865	0.505017	0.507185	-0.0545306	0.117442	-0.112905	0.078776	0.384607	-0.0942408	0.0643113	-0.0813844	-0.24648	0.308347	0.247237	0.302719	0.0852021	-0.0883497	-0.141104	-0.0248546	0.125182	0.0640724	0.189578	-0.124191	-0.163577	-0.0040929	-0.107546	0.398761	0.0438056	-0.175067	-0.133856	0.0586056	-0.023421	0.101223	-0.263297	-0.166258
1,2,3-Trihydroxybenzene	-0.447835	0.460398	-0.0515652	0.0500419	-0.145196	-0.0511387	0.0184812	-0.102396	-0.279366	-0.0585879	-0.16439	-0.0380681	-0.0426696	0.0659749	-0.131407	0.101494	0.360969	0.0946554	0.00515696	-0.16499	0.706068	0.0496163	0.603272	-0.0397592	0.0575204	-0.321467	0.110742	0.300684	-0.03637	-0.217548	-0.0197256	-0.407477	0.511777	0.113533	0.615032	0.306733	0.103779	0.0660208	0.609515	0.294415	0.0922494	0.014466	0.289209	-0.168768	0.337017	-0.133984	0.0600005	-0.189023	0.0542203
Dihydrokawain	-0.148238	0.207806	-0.0421889	-0.00705361	-0.148798	-0.0320429	-0.00236668	0.0271189	-0.202684	0.0134206	-0.0967942	0.0728577	-0.112914	0.0706097	-0.213235	0.0324752	0.459467	0.135885	0.0588365	-0.0885711	0.55748	-0.0520317	0.49069	-0.210542	0.157137	-0.432843	0.0637118	0.57866	-0.16634	-0.149474	0.0826472	-0.296939	0.425547	0.0019688	0.317997	0.556383	0.00476252	-0.209022	0.511386	0.201959	0.169587	-0.141925	0.477514	-0.117955	0.396342	-0.249446	0.151849	-0.141645	-0.126678
C-8 Ceramide-1-phosphate	0.0582733	0.15651	-0.242301	-0.0201803	0.186608	-0.271973	-0.26433	0.130232	0.009448	0.318743	0.535773	0.760347	0.238557	0.0318933	0.242022	0.0910127	-0.103781	0.78809	-0.121567	0.551812	-0.040316	-0.060955	-0.318673	-0.217894	0.389647	-0.170486	-0.138983	-0.212978	-0.00245913	-0.152161	0.766757	0.197041	-0.396643	0.28313	0.0473895	-0.210787	0.00907588	0.339744	-0.120729	-0.369375	-0.0711375	0.29882	-0.0738783	0.501825	0.0658248	0.0665915	-0.267362	0.280122	-0.071665
Propionylcarnitine	0.0588485	0.115727	-0.0784361	-0.315099	0.341846	-0.390336	-0.0643141	0.343513	0.272627	0.132489	-0.00434803	0.268668	0.179578	-0.427436	0.136745	0.319162	-0.213719	0.309046	-0.164826	-0.00177934	-0.00190668	-0.116418	-0.110175	-0.0631496	-0.161302	0.154951	0.0201357	-0.00963524	0.302072	-0.00922399	0.273965	-0.123007	-0.0357311	0.500557	0.0070154	0.0362359	0.115054	0.0258047	-0.0342481	-0.0893479	-0.0077385	0.205311	-0.127891	-0.0241443	-0.235353	0.0553611	-0.331829	-0.0885706	-0.127677
PC (18:5/22:6)	0.241089	-0.468757	0.34843	0.00389818	-0.491218	0.364466	0.327866	-0.109587	-0.230908	-0.339839	-0.000231399	-0.101322	-0.205734	-0.13494	-0.135546	-0.2058	-0.205795	-0.118876	0.224467	-0.00917218	0.101299	-0.453151	0.350572	-0.128688	0.119921	-0.240277	-0.246229	-0.11673	-0.0995	-0.10364	-0.101941	0.294192	0.17617	-0.0513707	-0.0602016	-0.106739	0.0381697	-0.288077	0.348416	0.487224	-0.219274	-0.00686894	0.40751	0.00659289	0.104406	0.0017955	-0.0567933	0.115241	-0.0791888
All-Trans-13,14-Dihydroretinol	0.18646	-0.181665	0.0237823	-0.0835509	-0.15874	0.132699	0.037847	0.448045	-0.0507247	-0.315616	-0.107948	-0.074123	-0.293268	-0.0168873	-0.220155	0.239031	-0.263043	-0.0574146	0.0790696	-0.102008	0.0533357	-0.173143	0.216258	-0.0211206	-0.0624913	-0.232077	-0.145082	0.0043323	0.223242	-0.28671	-0.0721646	0.00654974	-0.0573245	0.46359	-0.0465429	0.00540772	0.111828	-0.325649	0.252621	0.294656	-0.272645	0.082491	0.318752	-0.116264	-0.107196	-0.181788	-0.194467	-0.0552667	-0.170891
SM (d14:2/26:1)	0.195735	-0.181432	0.0728759	-0.095287	-0.371276	0.181799	0.347125	-0.0622663	-0.0284261	-0.383078	0.0111106	-0.214545	-0.236234	0.406488	-0.240613	0.125622	-0.0330258	-0.203303	0.66809	-0.0133967	-0.221734	0.225998	-0.078167	-0.119073	-0.0928322	0.317331	0.384513	-0.100603	-0.211605	-0.175223	-0.220522	-0.0925112	-0.289547	-0.187505	-0.0254972	-0.120181	-0.13093	0.0292453	-0.104448	0.0198843	-0.281458	0.106711	-0.0102644	0.0571847	-0.282745	0.0505676	-0.149962	0.0351167	0.124621
PC (20:3e/16:0)	-0.194752	0.124746	-0.118957	-0.0202955	0.372716	-0.110735	0.160955	-0.131701	0.0444485	0.0376958	0.031446	0.0675694	0.00984919	-0.0244821	-0.0260111	-0.0778078	0.406703	0.0972831	0.219246	0.03869	-0.0919475	0.213759	-0.293933	0.195092	-0.0482142	0.499597	0.396876	-0.0632405	0.0582614	0.120183	0.0691066	0.137539	-0.0919596	0.0316363	0.0370293	-0.0738193	0.248625	0.116897	-0.3618	-0.365612	0.0811788	0.182024	-0.35839	0.0167989	-0.0854056	0.0829682	0.0620724	-0.0425863	0.317166
Gamithromycin	-0.0519403	0.48851	-0.505666	-0.298961	0.587607	-0.525148	-0.106084	0.406284	0.206643	0.598337	-0.138652	0.112023	0.492253	-0.122831	0.373041	0.4563	0.484819	0.124439	-0.042997	-0.119345	0.00717282	0.330963	-0.174541	-0.146664	-0.169827	-0.216513	0.137574	0.296677	0.180342	-0.062863	0.11198	0.00875803	0.0293634	0.0909711	-0.0593214	0.257904	-0.0976696	-0.189367	-0.0724485	-0.146511	0.419013	0.110315	-0.0250468	-0.14624	-0.253343	0.282812	0.0279556	-0.372545	-0.064579
Naratriptan	0.319242	-0.44863	0.304376	0.219352	-0.346138	0.202206	-0.263312	-0.385505	0.0239705	0.123948	0.409488	0.204454	0.0657476	0.0754013	0.140804	-0.300002	-0.544961	0.11443	-0.189257	0.392849	-0.135728	-0.342936	-0.0216346	-0.243338	0.453853	-0.341794	-0.311068	-0.280618	-0.242151	0.362299	0.196705	0.110803	-0.129168	-0.259044	-0.268211	-0.262534	-0.332729	0.110633	0.062617	0.049712	0.0815816	-0.116423	0.0784696	0.422971	0.385352	-0.237079	-0.00551299	0.404901	-0.249947
PC (16:2e/22:5)	-0.224447	0.0525831	-0.0198093	-0.0393875	-0.0231914	-0.109733	0.418234	0.435698	0.0656664	-0.203385	-0.202057	-0.19348	-0.181921	-0.0911287	-0.245742	0.495857	0.395845	-0.13896	0.458334	-0.20879	0.0362252	0.195339	-0.157039	-0.0124427	-0.280391	-0.0639692	0.312251	0.151185	0.362212	-0.120953	-0.189012	-0.0287021	-0.0967212	0.294095	0.131776	0.136567	-0.00639711	-0.295238	-0.209374	-0.240605	0.126534	0.0924381	-0.353197	-0.211967	-0.270372	0.326881	0.0458962	-0.334393	-0.0626292
Octhilinone	-0.296088	0.439847	-0.280523	-0.113823	0.515163	-0.352261	0.00864673	0.0801482	-0.0389835	0.562349	-0.205059	-0.160266	0.800146	-0.299713	0.806965	0.0368921	0.166276	-0.105224	-0.248944	-0.194599	0.166966	0.01498	-0.0270971	-0.0812995	-0.279221	-0.0366171	-0.110027	-0.104342	0.0960714	-0.194483	-0.153337	0.0513639	0.172209	0.18222	0.210141	-0.0921857	0.192653	-0.0161781	0.0653947	-0.0986319	0.224747	0.290456	-0.0710496	-0.195405	-0.46469	0.496243	-0.272344	-0.166426	0.317266
(5ξ,9ξ,16ξ)-17-Hydroxykauran-19-oic acid	0.263361	-0.276329	0.201267	0.0535208	-0.427133	0.247641	0.140634	-0.197814	-0.309049	-0.330119	0.00038599	-0.0845487	-0.227185	-0.0282628	-0.165791	-0.202349	-0.257084	-0.098936	0.0771507	-0.00569843	0.160937	-0.339916	0.467395	-0.0835578	0.175908	-0.182012	-0.209772	-0.0198154	-0.150044	-0.18028	-0.0862448	0.151224	0.282612	-0.107343	-0.04344	-0.00680995	-0.00260257	-0.109797	0.468641	0.631111	-0.317122	-0.0349951	0.475726	0.0153108	0.24009	-0.187555	-0.038954	0.139442	-0.125667
PE (16:2e/24:4)	-0.291299	0.207062	-0.0173347	-0.0521851	-0.0944784	-0.148379	0.542219	0.061614	-0.429685	-0.285128	-0.0727231	-0.0573675	0.0295826	0.140794	-0.0107404	0.310214	0.259273	0.016649	0.582079	-0.086799	0.0776274	0.108684	0.0265657	-0.189483	-0.203758	0.0629811	0.408739	0.270199	0.0781596	-0.577838	-0.0551928	-0.00969771	0.0451968	0.0955503	0.175421	0.282613	-0.0612415	-0.000359049	-0.0741589	-0.039087	-0.273053	0.327497	-0.236833	-0.0692437	-0.343529	0.409834	-0.358362	-0.227991	0.148872
22(S)-Hydroxycholesterol	0.569737	-0.24985	-0.196898	0.41977	-0.247104	-0.1047	-0.315434	-0.135409	-0.170337	0.120323	0.54448	0.326588	-0.0212388	0.222096	0.0360076	-0.155548	-0.164366	0.273548	-0.0343047	0.563605	0.0323205	-0.291562	-0.0159317	-0.504849	0.677745	-0.39507	-0.264839	-0.135359	-0.422044	-0.0829507	0.321932	0.429785	-0.209221	-0.234628	-0.116339	-0.178692	-0.147547	0.168511	0.269586	0.137049	-0.179005	-0.00737388	0.307964	0.550448	0.401068	-0.241587	-0.0183822	0.606921	-0.351561
7-(2-aminophenyl)heptanoic acid	0.0109776	-0.264731	0.386864	-0.238409	-0.309756	0.258605	0.289421	0.115942	0.114663	-0.509249	-0.360531	-0.147282	-0.449103	-0.198981	-0.498048	0.131987	-0.126381	-0.101414	0.127871	-0.354237	0.142414	-0.29838	0.465029	0.271024	-0.301449	-0.02589	0.0299141	0.183608	0.290871	0.0340489	-0.141592	-0.232467	0.292067	0.28442	0.0618503	0.206196	0.152795	-0.402617	0.372523	0.521841	-0.112648	-0.0228276	0.337189	-0.375471	0.0520287	-0.210585	-0.237512	-0.225979	-0.0733196
2-Linoleoyl glycerol	0.288	-0.587736	0.579784	-0.182097	-0.547622	0.423125	0.13636	0.0351461	0.19552	-0.547705	-0.0844324	-0.0741343	-0.477233	-0.140445	-0.465189	-0.108147	-0.527272	-0.10659	0.0289319	-0.104131	-0.0682399	-0.47003	0.221902	0.0198039	-0.131264	0.0470452	-0.297633	-0.0408879	-0.0387218	0.190163	-0.0744815	-0.0659519	0.041899	-0.0667371	-0.0495439	-0.00724655	-0.00657154	-0.135882	0.165599	0.33496	-0.21008	-0.319011	0.239981	-0.0809091	-0.0199009	-0.153731	-0.094448	0.0630727	-0.219953
Choline	0.358106	-0.368814	0.243718	0.0901233	-0.421946	0.249468	0.154793	-0.332808	-0.408049	-0.360394	0.11949	-0.0210924	-0.16959	0.0281321	-0.0605207	-0.451539	-0.400253	-0.0692976	0.0466214	0.105175	-0.0136467	-0.386507	0.275962	-0.0629957	0.182331	0.0573656	-0.291678	-0.0174545	-0.251217	-0.272834	-0.0283938	0.158112	0.153103	-0.175194	-0.164658	0.00741648	-0.0157796	0.0367215	0.253743	0.420882	-0.464934	-0.0364623	0.389974	0.139218	0.122837	-0.164039	-0.166239	0.288189	-0.0608177
Palmitoyl sphingomyelin	0.0476363	0.0966094	-0.13923	-0.191838	0.309687	-0.185347	-0.111958	0.2965	0.482945	0.216431	-0.423214	-0.379769	0.00425148	-0.0618489	-0.127429	0.383076	0.384138	-0.393785	-0.00409406	-0.414902	0.0387018	0.21558	0.0474982	0.106809	-0.335138	-0.183173	0.157393	0.34201	0.27156	0.438365	-0.381629	-0.23273	0.191474	-0.0206572	-0.0801323	0.29095	-0.0990951	-0.46225	0.0748763	0.0827001	0.642483	-0.256851	0.0380697	-0.410136	-0.0789682	-0.120346	0.223303	-0.456666	-0.191075
PC (2:0/16:0)	0.47393	-0.463559	0.172321	0.43605	-0.605671	0.184091	-0.0979151	-0.156966	-0.333596	-0.291766	0.343482	-0.0433786	-0.160121	0.405077	-0.0311934	-0.223469	-0.592727	-0.143595	0.0291473	0.331547	-0.246985	-0.30897	-0.0618212	-0.432431	0.301751	-0.204078	-0.314212	-0.00269581	-0.441063	-0.302938	-0.057867	0.157275	-0.29035	-0.38115	-0.255496	-0.00581774	-0.364955	0.168643	0.00700708	0.079437	-0.5031	-0.17025	0.101875	0.371379	0.0328925	-0.0847705	-0.216166	0.524068	-0.300542
LPC 16:3	0.0985902	-0.704967	0.761545	-0.0294898	-0.76995	0.605492	0.33624	-0.123924	-0.142125	-0.58249	0.0139058	0.0535788	-0.518752	0.0136947	-0.49024	-0.191842	-0.395487	-0.00806764	0.208211	-0.00409859	-0.106281	-0.49817	0.267719	-0.0843696	0.040351	-0.251084	-0.11826	0.247718	-0.10974	0.0516383	0.0472171	-0.0657355	0.0669561	-0.142869	-0.237327	0.286088	-0.228639	-0.344133	0.0607302	0.243069	-0.25712	-0.235386	0.233802	-0.0127816	0.249312	-0.157782	-0.0878326	0.0611166	-0.203399
Radicicol	-0.00849252	-0.388204	0.517499	-0.213401	-0.417473	0.30409	0.312014	0.273037	0.00300118	-0.386417	-0.21668	-0.11894	-0.241247	-0.404665	-0.195332	0.0594319	-0.421047	-0.138614	-0.0301422	-0.242853	0.00288315	-0.373182	0.203562	0.0275718	-0.257861	-0.186599	-0.313191	0.064326	0.253123	-0.0565011	-0.118496	-0.104998	0.146517	0.250762	-0.0839663	0.126985	-0.0624946	-0.34377	0.0567468	0.207739	-0.150623	-0.162067	0.0815019	-0.231591	-0.121297	0.132897	-0.0446918	-0.183734	-0.218122
3-(2-Naphthyl)-D-Alanine	-0.0347156	-0.350405	0.485385	-0.138724	-0.469988	0.507685	0.295783	-0.149323	-0.103103	-0.555266	-0.172003	-0.0537131	-0.443321	-0.04487	-0.412865	-0.114551	-0.293825	-0.0261929	0.145128	-0.17394	0.0730571	-0.327322	0.472889	0.314984	-0.0973152	-0.0550302	-0.0718902	-0.0928076	0.160514	-0.00889402	-0.0495686	-0.0480826	0.214726	0.147997	0.0184275	-0.0613628	0.129298	-0.236644	0.34108	0.563799	-0.266708	0.0483979	0.355492	-0.181493	0.171004	-0.201372	-0.197522	-0.0694388	0.0698165
PC (14:0e/7:0)	0.169238	-0.0497497	0.054863	-0.214316	-0.066459	0.167352	-0.137922	0.188901	0.124502	-0.160091	-0.32689	-0.214899	-0.185079	-0.263457	-0.171938	-0.0295329	-0.201245	-0.188724	-0.292431	-0.315256	0.298653	-0.257544	0.552145	0.11514	-0.132574	-0.0785	-0.322377	-0.0227179	0.0187787	0.0158572	-0.207365	-0.0628584	0.384435	0.139721	0.150975	-0.01442	0.292304	-0.210822	0.597237	0.670471	-0.103952	-0.185267	0.607881	-0.322881	0.0602261	-0.273062	0.072429	-0.0879535	-0.0770284
PC (18:3e/22:6)	-0.102342	-0.284747	0.32587	0.0125726	-0.334042	0.229275	0.529105	-0.286855	-0.463241	-0.175804	0.181636	0.28259	-0.0167869	0.052208	-0.0421811	-0.257463	0.341959	0.309496	0.507413	0.186379	0.201153	-0.443852	0.208167	-0.276231	0.224139	-0.316121	0.0677513	0.277921	-0.199514	-0.243077	0.286214	0.324985	0.168814	-0.107553	0.0681784	0.268529	0.0361853	-0.270771	0.167781	0.0640057	-0.0513353	0.198614	0.261637	0.14842	0.154681	0.180806	-0.275814	0.0565406	0.134586
3-Hydroxyanthranilic acid	-0.317977	-0.289984	0.542754	-0.313515	-0.468504	0.633648	0.570494	0.0471881	-0.158084	-0.283154	-0.314634	-0.185581	-0.112227	-0.292534	-0.0603774	-0.172743	0.00187536	-0.141065	0.240869	-0.333327	0.213822	-0.254842	0.43306	0.150798	-0.213629	-0.23884	-0.140246	-0.0868216	0.104612	-0.10157	-0.177086	-0.0607143	0.264667	0.230759	0.134931	-0.0476046	0.176643	-0.53089	0.238305	0.275836	-0.0359196	0.0578792	0.387742	-0.33258	-0.0446395	0.209671	0.0550778	-0.272412	0.266576
L-Ascorbate	-0.0952121	0.227818	-0.24438	-0.0763719	0.0377339	0.204934	-0.102569	0.13239	-0.225634	0.202408	-0.0509648	-0.0775342	-0.0428985	-0.1331	0.0473049	-0.130338	0.231419	-0.0854824	-0.0972948	-0.0664942	0.275908	0.378429	0.270642	-0.0152858	0.313723	-0.161345	-0.00809304	-0.0896236	-0.157188	-0.0972349	-0.0765277	-0.0132248	0.221063	0.0773884	-0.0128105	-0.0865982	0.0813253	-0.13952	0.171157	0.144642	-0.00872245	-0.0912655	0.368225	-0.0549664	0.398334	-0.225476	0.852662	-0.107906	0.0487059
PC (16:2e/6:0)	-0.0154586	-0.310714	0.278491	-0.157724	-0.437181	0.489638	0.184651	0.451897	0.13182	-0.36689	-0.315282	-0.362103	-0.374202	0.149836	-0.324094	0.330837	-0.203349	-0.343497	0.284552	-0.321133	-0.00771509	0.00136991	0.27403	0.0259072	-0.238249	-0.347262	0.0567287	-0.0180584	0.178293	-0.0695879	-0.36076	-0.27187	-0.127691	0.348994	-0.0287382	-0.025339	-0.0308128	-0.587348	0.196887	0.239922	-0.0781991	-0.00922465	0.318532	-0.313922	-0.139055	-0.149322	-0.0512336	-0.226904	-0.0350806
ACar 22:7	-0.113551	0.13831	-0.00222998	-0.236466	0.284733	0.183867	-0.217029	0.12398	0.178907	-0.0332565	-0.379641	-0.347162	-0.150403	-0.425488	-0.0977901	-0.147197	-0.105834	-0.358725	-0.474815	-0.395566	0.178503	0.100792	0.27135	0.42369	-0.202309	0.249914	-0.294077	-0.234509	0.181046	0.306977	-0.342286	0.00400539	0.416285	0.0498301	0.0762208	-0.203341	0.322537	0.00689535	0.139683	0.350191	0.106451	-0.355739	0.109735	-0.370995	0.0483826	-0.172946	0.654518	-0.293766	0.0523502
7,8-Dihydrobiopterin	0.297858	-0.215083	-0.0284208	0.492714	-0.125136	-0.302311	-0.133786	-0.0509623	-0.135951	0.0342157	0.201402	0.0405435	-0.0442069	0.225731	-0.0866547	-0.0867341	0.104917	-0.0599746	-0.0650548	0.218625	-0.168714	-0.183277	-0.280431	-0.455024	0.164066	-0.140049	0.028927	0.709935	-0.340251	-0.0930381	0.0250324	-0.029316	-0.113481	-0.415058	-0.277121	0.677438	-0.377949	-0.0167879	-0.240101	-0.365658	-0.0369279	-0.304536	-0.177398	0.184639	0.139725	-0.0792615	-0.103713	0.321984	-0.411216
2-[2-(2-pyridyloxy)ethoxy]pyridine	0.24115	-0.341788	0.28764	-0.118039	-0.256617	0.101358	0.135669	-0.107808	-0.0265388	0.148933	0.0514405	0.0383213	0.307477	-0.18767	0.346788	-0.164217	-0.359163	-0.0359891	-0.0666004	0.0376349	-0.180823	-0.343909	0.0153461	-0.214282	-0.00730368	-0.285805	-0.326908	-0.0054985	-0.0857987	0.0097131	0.0293077	0.0794852	0.0180448	-0.148416	-0.306608	0.0208938	-0.282656	-0.219836	0.0292975	0.125454	0.0329822	-0.0169546	0.185185	0.0621429	-0.0970019	0.211688	-0.224795	0.0731542	-0.133743
PC (22:6e/11:0)	0.0901326	-0.249085	0.207679	-0.0660184	-0.32445	0.464753	0.262605	-0.222878	-0.145803	-0.285598	-0.300557	-0.367422	-0.293189	-0.0113384	-0.244857	-0.214985	0.0203316	-0.377645	0.196229	-0.298243	0.0794687	-0.0236013	0.523451	0.224657	-0.0133669	0.00881351	0.140402	-0.0284932	-0.0852599	0.0242101	-0.371589	-0.0279435	0.32917	-0.0865311	-0.141478	-0.0310134	0.101936	-0.414563	0.38207	0.644757	-0.161222	0.00803361	0.533732	-0.287664	0.278234	-0.301581	0.20467	-0.0715468	0.156322
Leucine-enkephalin	0.280805	-0.382959	0.319643	-0.0479426	-0.432489	0.162108	0.0814196	0.0786044	0.137409	-0.463519	-0.0198137	-0.205466	-0.367745	0.270869	-0.410272	0.26248	-0.318111	-0.229133	0.338163	-0.0451546	-0.0830978	-0.225141	0.0898081	-0.25582	-0.114871	-0.133489	-0.022456	0.088112	-0.0660415	0.116903	-0.208656	-0.0306643	-0.0772493	-0.243426	-0.00563383	0.0765557	-0.25731	-0.0525175	0.118578	0.242933	-0.0420235	-0.260008	0.000531262	0.0146399	-0.181111	-0.0617349	-0.194378	-0.0437229	-0.305186
3-(3,4,5-trimethoxyphenyl)propanoic acid	-0.0457231	-0.294035	0.265809	-0.243122	-0.231711	0.685851	0.202287	-0.144361	-0.00746256	-0.339037	-0.0405948	-0.121114	-0.265901	0.411075	-0.171666	-0.202945	-0.160709	-0.105431	0.423852	-0.0508703	-0.201766	0.0852707	0.0918227	0.298143	-0.0580559	0.207593	0.143585	-0.435046	-0.0675556	0.0405936	-0.120762	0.0475344	-0.258317	0.0487398	-0.0485894	-0.449668	0.204849	-0.147851	-0.0211698	0.126702	-0.183007	0.1825	0.268616	-0.0244853	-0.156256	-0.171631	-0.105934	-0.036439	0.477929
LPE 20:2	0.0807419	-0.402707	0.2932	0.385151	-0.350233	0.180416	-0.183919	0.261411	0.420272	-0.17129	-0.18688	-0.469363	-0.230296	0.0498841	-0.213493	0.209122	-0.339665	-0.516594	-0.24598	-0.178578	-0.138984	-0.239334	-0.112329	0.0330404	-0.24741	-0.381588	-0.341659	-0.107561	0.19619	0.38049	-0.470812	-0.0864752	-0.213741	-0.0506136	0.00502849	-0.130108	-0.180652	-0.229927	-0.0332963	-0.0556317	0.236483	-0.381507	-0.239288	-0.175615	-0.115846	0.0379462	-0.0378804	0.0738911	-0.33358
Biliverdin	0.129172	-0.288357	0.243369	0.47312	-0.270322	-0.14983	-0.0772579	-0.145923	-0.265424	-0.0764198	0.201992	0.0220645	0.050805	0.108571	0.0640225	-0.128709	-0.325882	-0.0978913	-0.22166	0.202744	-0.268808	-0.354171	-0.243415	-0.511441	0.0685309	-0.108872	-0.107837	0.541756	-0.37402	-0.16435	0.00513157	0.0415183	-0.0694421	-0.519483	-0.302293	0.566996	-0.462161	0.160822	-0.32509	-0.262627	-0.282013	-0.309784	-0.369328	0.18466	0.00716602	0.157395	-0.212132	0.33894	-0.355101
4-(2,3-dihydro-1H-indol-1-yl)-1-phenyl-1H-pyrazolo[3,4-d]pyrimidine	-0.363447	-0.0856322	0.405318	-0.353227	-0.214644	0.630941	0.418214	-0.156116	-0.238315	-0.636105	-0.361841	-0.17576	-0.417409	0.141163	-0.392528	-0.191989	-0.0116733	-0.0990438	0.307134	-0.366131	0.128592	-0.107625	0.501791	0.493695	-0.337888	0.281543	0.11957	-0.0306196	0.109628	-0.186504	-0.166774	-0.0670651	0.285341	0.122103	0.215123	-0.00841268	0.40257	-0.165564	0.244134	0.479201	-0.326972	0.10815	0.344278	-0.371179	-0.129371	-0.0976469	-0.195325	-0.31777	0.503232
PC (22:3e/18:1)	0.0139421	-0.011232	0.124852	0.021116	-0.219622	-0.00495065	-0.0989376	-0.00435207	0.238465	-0.0699918	-0.110895	-0.11498	-0.155754	-0.14677	-0.199549	-0.0392291	-0.117004	-0.0929924	-0.174972	-0.11835	0.124865	0.0663549	0.110238	-0.0600259	-0.051023	0.281487	0.150788	0.127265	-0.221912	0.139506	-0.112601	-0.559675	0.0609577	-0.000463038	0.161213	0.161086	0.0017698	0.0956383	0.0779766	-0.0827153	-0.0898862	-0.203625	0.0434328	-0.11039	0.1709	-0.239515	0.160988	0.144541	-0.0742926
PC (16:0e/16:1)	-0.00530759	0.36974	-0.524098	0.143385	0.50845	-0.555305	-0.395844	0.356582	0.320785	0.576606	0.172939	0.221132	0.372879	-0.112933	0.310705	0.478461	0.21851	0.247062	-0.238875	0.205629	0.033154	0.181052	-0.325897	-0.222793	0.145587	-0.281717	0.0335323	-0.18345	0.173622	0.142662	0.226842	0.227389	-0.231465	0.187114	0.091585	-0.220629	-0.010709	0.126073	-0.070487	-0.26152	0.340273	0.162681	-0.304591	0.159408	-0.02722	0.177159	0.0360955	0.0458235	-0.180178
PC (20:4e/4:0)	0.064369	-0.0165882	0.000488963	-0.0249346	-0.278135	0.0202193	-0.0450761	0.331692	0.119805	-0.165286	-0.118028	-0.0866849	-0.219511	0.15885	-0.254685	0.505922	-0.149202	-0.0384099	0.156748	-0.108753	0.126159	0.0337318	0.291923	-0.181976	-0.028111	-0.365332	0.206556	0.111267	0.0949367	-0.117834	-0.0832437	-0.330274	-0.052135	0.291449	0.0746906	0.104431	-0.136032	-0.259918	0.355527	0.299659	-0.0952912	0.102509	0.24523	-0.117082	0.0766845	-0.234958	-0.20181	-0.0678225	-0.216082
PC (17:0/17:0)	-0.122743	0.425486	-0.452943	-0.0561977	0.428881	-0.414685	-0.270062	0.417775	0.158694	0.519538	0.167091	0.32318	0.468356	-0.0566994	0.46977	0.368825	0.0264436	0.357247	-0.233561	0.184452	-0.0828761	0.256769	-0.384621	-0.0855612	0.0103659	-0.187729	-0.0852372	-0.208494	0.232827	-0.180729	0.328227	0.0375975	-0.364111	0.385581	0.0561275	-0.215662	-0.0166428	0.15892	-0.214869	-0.414618	0.12232	0.290892	-0.244635	0.152344	-0.259941	0.302912	-0.158257	-0.0198248	-0.00566445
Bitertanol	-0.00325224	-0.130725	0.105651	0.189791	-0.548777	0.370415	0.111641	-0.170912	-0.209889	-0.010361	0.0047097	-0.128401	-0.0573305	0.14749	0.0213215	0.0327853	-0.176649	-0.145443	0.113658	0.00595493	-0.0141779	0.136461	0.334772	-0.0095114	0.256688	-0.47386	0.0965902	-0.240313	-0.0806557	-0.0995513	-0.133917	-0.0819034	0.000356101	-0.0381632	-0.178025	-0.235855	-0.289926	-0.25317	0.280354	0.42708	-0.169342	0.184225	0.321137	0.0164753	0.434364	-0.114761	0.164516	0.11265	-0.0112697
3-amino-2-phenyl-2H-pyrazolo[4,3-c]pyridine-4,6-diol	0.594197	-0.305049	-0.0969088	0.625921	-0.310021	-0.191733	-0.377035	-0.10069	-0.00952836	-0.207964	0.298436	-0.0795547	-0.286555	0.362935	-0.278268	-0.266399	-0.144211	-0.131567	-0.145375	0.315793	0.0335673	-0.33619	-0.13018	-0.416025	0.295439	0.0495541	-0.278946	0.260384	-0.530371	-0.0526376	-0.0848869	0.0246365	-0.204346	-0.406955	0.0924367	0.20652	-0.0622298	0.30453	0.134011	-0.140468	-0.223601	-0.415827	0.095556	0.319485	0.12832	-0.331975	-0.132664	0.658608	-0.404683
PC (5:0/13:1)	0.120185	-0.404821	0.419602	0.201347	-0.385198	0.171003	-0.0329562	-0.272906	-0.154288	0.0324404	0.239624	0.0664053	0.215416	-0.0435018	0.29561	-0.281794	-0.554873	-0.00877152	-0.204323	0.219877	-0.100467	-0.503312	-0.01104	-0.312748	0.162867	-0.358285	-0.440097	-0.0955858	-0.193876	0.0634907	0.0602805	0.121451	-0.0257635	-0.245327	-0.157458	-0.0559563	-0.306385	0.0596007	0.00825826	0.0015478	-0.0380571	-0.118777	-0.0341022	0.246994	0.0385849	0.146119	-0.239642	0.282512	-0.179725
DL-5-Methoxytryptophan	0.130748	-0.349138	0.451627	-0.221578	-0.367081	0.423165	0.216001	-0.212248	-0.143868	-0.40392	-0.169089	-0.134219	-0.342796	-0.244131	-0.303019	-0.417091	-0.254422	-0.187453	-0.03895	-0.198535	0.0366366	-0.25165	0.360611	0.109813	-0.0516354	0.232913	-0.185856	0.141657	-0.195881	0.0538778	-0.1392	-0.0681427	0.377919	-0.245673	-0.13682	0.191129	0.0338877	-0.104899	0.140211	0.397802	-0.256395	-0.341941	0.336819	-0.167114	0.171914	-0.184307	0.294149	-0.0437505	-0.0331926
PC (16:2e/16:0)	-0.420015	0.374438	-0.190263	0.157195	0.392058	-0.202407	-0.138985	0.0364058	-0.00780846	0.200079	-0.0696504	-0.109199	0.348608	-0.0381829	0.320116	0.113387	0.21926	-0.012224	-0.18043	-0.045455	0.328948	-0.133259	0.0280155	-0.102309	-0.129836	-0.0431133	-0.0790123	-0.229515	0.00575361	-0.0280332	-0.0920333	0.303738	0.120396	0.0140118	0.554304	-0.244208	0.376706	0.269482	0.159511	-0.0388419	0.147213	0.123345	-0.245262	-0.074134	-0.29889	0.368903	-0.196735	-0.028106	0.289154
Deoxycholic Acid	-0.0132492	-0.374886	0.407385	0.363401	-0.530438	0.393536	0.132881	-0.269925	-0.277125	-0.359684	-0.130988	-0.524559	-0.276038	0.0936842	-0.18545	-0.306493	-0.186153	-0.558071	0.0626592	-0.159173	0.192127	-0.228731	0.334741	-0.102534	0.0589398	-0.173777	-0.0879833	0.105673	-0.200877	0.0563511	-0.528458	-0.18103	0.255428	-0.193684	0.0312431	0.122545	-0.114313	-0.191307	0.218017	0.18864	-0.0589523	-0.279622	0.11101	-0.106811	0.234607	-0.228799	0.193565	0.109922	-0.0811407
3-[4-methyl-1-(2-methylpropanoyl)-3-oxocyclohexyl]butanoic acid	0.370083	-0.403926	0.0618652	0.39972	-0.291266	0.181102	0.00683412	-0.239378	-0.26651	-0.193479	0.234163	0.0168558	-0.179886	0.0512676	-0.0594391	-0.279291	-0.273607	-0.0421205	-0.00542102	0.255409	-0.12187	-0.341097	0.0895808	-0.0638221	0.355773	-0.127045	-0.192088	-0.257611	-0.153907	-0.0993435	0.0090711	0.491068	-0.0692472	-0.127922	-0.24748	-0.269668	0.0235657	-0.0299595	0.161532	0.351213	-0.37246	0.0943427	0.200766	0.234025	0.281822	-0.151614	-0.0821827	0.450184	-0.100522
PC (18:2e/22:2)	-0.335979	0.781452	-0.619246	-0.0956861	0.618287	-0.618636	0.00946864	0.169135	0.0888185	0.456566	-0.149432	0.0282843	0.483821	-0.287893	0.382327	0.292398	0.601653	0.159401	-0.0775562	-0.126924	0.312817	0.402796	-0.0882351	0.107188	-0.177542	0.247534	0.224414	-0.119651	0.203057	-0.197018	0.0435781	-0.01336	0.132671	0.276157	0.472985	-0.133075	0.335831	0.251881	0.0628037	-0.153107	0.194255	0.343906	-0.209473	-0.146619	-0.237421	0.396611	0.00956055	-0.188671	0.265864
7α-Hydroxytestosterone	-0.264655	0.421661	-0.214587	0.235543	-0.0511503	0.0024255	-0.0159236	-0.196479	-0.323651	-0.168572	-0.256273	-0.313734	-0.194424	0.110365	-0.202598	-0.21949	0.390742	-0.245764	-0.131703	-0.253174	0.450098	0.247738	0.398028	0.342516	-0.0317981	0.0989811	-0.0317182	0.190476	-0.0323584	-0.240561	-0.30527	-0.259649	0.434823	-0.0739648	0.412461	0.174327	0.211958	0.164907	0.353447	0.243795	-0.0642125	-0.156361	0.205988	-0.240129	0.268767	-0.175003	0.336188	-0.0883874	0.13022
Octadecanamine	0.0149308	0.205457	-0.228116	0.164304	0.204943	-0.152362	-0.105347	-0.11572	-0.268529	-0.0782597	0.109246	0.0451839	0.173935	-0.0087896	0.274108	-0.240071	-0.2525	0.0804035	-0.262741	0.12324	0.00574587	-0.149264	-0.0600358	0.157999	-0.0287824	0.343361	-0.334984	-0.372594	-0.00361234	-0.398889	0.0502771	0.337261	-0.0459508	0.0732213	0.206886	-0.358947	0.347978	0.494258	0.0497163	0.0974071	-0.443007	0.201927	-0.0696889	0.123119	-0.295874	0.199648	-0.350291	0.260697	0.22644
6-(7-methyloctyl)-1H,3H,4H,6H-furo[3,4-c]furan-1-one	0.178164	-0.240038	0.26096	-0.312125	-0.0801593	0.152931	0.0624449	0.215023	-0.0402749	-0.291561	-0.170553	-0.113871	-0.118685	-0.184721	-0.0946922	-0.155065	-0.204071	-0.0854701	-0.017819	-0.189036	0.337227	-0.548167	0.369381	-0.139028	-0.176545	-0.095834	-0.468742	0.178459	-0.00505385	-0.110597	-0.104596	-0.00757092	0.302408	0.205559	0.227404	0.192371	0.286847	-0.218879	0.431399	0.289354	-0.0131664	-0.21858	0.483834	-0.164378	-0.279469	-0.110705	-0.237386	-0.130548	-0.0883509
PC (18:3e/17:0)	-0.0585156	0.208456	-0.284446	0.30973	0.320778	-0.306336	-0.16502	-0.0420073	-0.201429	0.150782	0.276483	0.217878	0.300882	0.0001761	0.373829	-0.188054	-0.0752916	0.230393	-0.277612	0.298645	-0.0930891	-0.0996255	-0.382777	-0.0323611	0.0760109	0.264767	-0.224038	-0.23501	-0.0596709	-0.317412	0.220486	0.368578	-0.249523	0.0435282	0.133686	-0.231976	0.232874	0.497307	-0.259552	-0.365363	-0.284112	0.19513	-0.353822	0.265155	-0.264655	0.310575	-0.29941	0.346604	0.165113
Kaempferol	0.48629	-0.258881	-0.0125511	0.158831	-0.188992	-0.0109221	-0.190196	-0.255977	-0.0752876	-0.12773	0.388207	-0.0423069	-0.0651196	0.500503	0.0104246	-0.20068	-0.370636	-0.103055	0.241418	0.345425	-0.191839	0.00863721	-0.250624	-0.269137	0.274457	0.13703	-0.0951654	-0.150181	-0.295902	0.0385287	-0.0524078	-0.0414453	-0.338258	-0.249882	-0.14088	-0.169484	-0.2722	0.333156	-0.1132	-0.21166	-0.0561932	-0.118875	-0.0572859	0.45293	-0.0959488	-0.272572	-0.126479	0.318092	-0.16994
β-Pseudouridine	0.171443	0.00994482	-0.124466	0.0792527	-0.186901	-0.1218	-0.0756499	0.0483623	-0.115373	0.114393	0.250309	0.313328	-0.0309676	0.357213	-0.121506	0.04554	0.298815	0.282215	0.193738	0.26298	-0.0047047	0.0604963	-0.0874252	-0.542774	0.282037	-0.199603	0.200739	0.578873	-0.523338	-0.212872	0.307246	-0.0928244	-0.146377	-0.378044	-0.0610142	0.53713	-0.288667	0.0120266	-0.0423971	-0.240044	-0.0758732	-0.15724	0.183789	0.2294	0.179743	-0.0706776	0.0408837	0.182238	-0.193666
11-Deoxy prostaglandin F1α	-0.373464	0.26152	-0.123639	-0.0579635	0.0781048	0.179578	-0.260095	0.33597	0.427518	0.454444	-0.273013	-0.276457	0.210278	-0.00801602	0.188912	0.424228	0.104836	-0.275088	-0.245962	-0.262384	-0.0338703	0.477882	-0.00366715	0.0560054	-0.136383	-0.409504	0.103626	-0.297082	0.0898216	0.353356	-0.273455	-0.16251	-0.109799	-0.0320653	0.0411454	-0.315363	-0.153087	-0.220024	-0.0470965	-0.0235815	0.405388	-0.0905366	-0.0976208	-0.274797	0.0360599	0.164781	0.525878	-0.277644	0.0827376
PE (14:1e/24:4)	0.311913	-0.679333	0.402578	0.26967	-0.454603	0.340959	-0.132558	0.0839769	0.24429	-0.188879	0.329585	0.223188	-0.367139	0.00603282	-0.314434	-0.0566029	-0.41055	0.130568	-0.0995976	0.334966	-0.265653	-0.453835	-0.230379	-0.0812345	0.280798	-0.452593	-0.455466	-0.269741	0.0524613	0.404103	0.219133	0.385242	-0.371939	-0.103044	-0.247527	-0.284119	-0.19959	-0.118024	-0.149201	-0.0917959	0.0735652	-0.276077	-0.0934971	0.305732	0.244998	-0.059494	0.0721897	0.317478	-0.411199
SM (d28:1/13:1)	0.24524	-0.01579	-0.0509782	0.0662202	-0.186702	-0.159189	-0.17401	0.0276751	0.14584	-0.0871977	0.12832	-0.0538499	-0.159765	0.164028	-0.188902	0.0629035	-0.149759	-0.0511436	0.0867188	0.103831	0.028257	0.1805	-0.0886892	-0.348448	0.11698	0.315202	0.262001	0.156917	-0.369166	0.0144066	-0.0567726	-0.496739	-0.170278	-0.0812317	0.0844366	0.168392	-0.157108	0.255968	-0.0368278	-0.255032	-0.150583	-0.173958	-0.0488404	0.154219	0.0503725	-0.307715	0.0892271	0.240952	-0.187514
6-O-(2-Methylbutanoyl)-α-D-glucopyranosyl α-D-glucopyranoside	-0.336637	0.395255	-0.0396573	-0.271909	0.444038	-0.226024	-0.228204	-0.0553211	0.335667	0.45509	-0.242122	0.00893485	0.494852	-0.387938	0.38634	-0.0787996	0.196302	0.108641	-0.469636	-0.231466	0.472738	-0.177212	0.234956	0.131179	-0.245398	-0.0235428	-0.257914	-0.0527618	0.103246	0.324681	0.0291377	-0.219389	0.414189	0.140206	0.531529	-0.0392867	0.356547	0.0948052	0.370605	0.0316511	0.54696	-0.0421636	0.134024	-0.245029	-0.117263	0.11924	-0.119192	-0.211404	0.216771
Cholecalciferol	0.637184	-0.118655	-0.351909	0.286662	-0.0752712	-0.269353	-0.440648	-0.186595	-0.0234826	0.359621	0.708521	0.553316	0.130624	0.401968	0.129588	-0.155684	-0.0406548	0.481537	0.0262863	0.72323	-0.147738	-0.0323893	-0.309195	-0.605825	0.73808	-0.179618	-0.0633647	-0.0230476	-0.611978	-0.00676142	0.544041	0.275986	-0.43036	-0.400509	-0.210879	-0.0800128	-0.286845	0.354937	-0.00494322	-0.226438	-0.0770388	-0.0164516	0.197854	0.717833	0.347441	-0.26104	0.00240164	0.644623	-0.30785
N-Acetyl-D-phenylalanine	0.324635	-0.0460912	-0.176017	-0.0552874	0.0489039	-0.167656	0.0624922	-0.0466998	0.0609179	0.0503174	-0.0395548	-0.0318223	-0.139735	0.0621122	-0.232528	-0.00183902	0.455766	-0.042722	0.295891	-0.0304777	0.102085	0.108332	0.114024	-0.154428	0.137762	0.0622468	0.340529	0.427553	-0.191823	0.0893901	-0.0371335	-0.115463	0.150567	-0.130075	-0.12386	0.380312	-0.0346255	-0.272409	0.167208	0.0918787	0.16639	-0.0682193	0.324655	-0.0344446	0.245887	-0.340192	0.166471	-0.0119129	-0.134107
Sedanolide	-0.378712	0.357198	-0.0223375	-0.0624961	-0.0189381	0.11254	-0.0889626	-0.0119674	-0.311903	-0.0637319	-0.182618	-0.0369168	0.00568606	-0.0729947	-0.00226435	-0.185254	0.212777	0.111012	-0.1705	-0.173168	0.838185	-0.223023	0.740693	-0.148684	0.081754	-0.133824	-0.0841505	0.177214	-0.275612	-0.3168	-0.0131766	-0.272461	0.558407	0.248945	0.728906	0.195609	0.511708	0.045716	0.777221	0.360375	-0.126518	0.0169827	0.61431	-0.201288	0.198853	-0.247804	-0.00391331	-0.0279603	0.266431
methyl 3,4,5-trihydroxycyclohex-1-ene-1-carboxylate	0.00954681	-0.200122	0.244934	0.0663176	-0.310481	0.245351	0.12602	-0.281039	-0.182068	-0.103693	-0.0309215	-0.00908918	-0.00906486	0.0360783	-0.00214588	-0.13086	-0.0888204	0.0112317	0.0609895	-0.0159527	0.190732	-0.368921	0.452277	-0.0204643	0.114206	-0.381367	-0.0947304	-0.0231956	-0.0503502	-0.0132544	-0.00576357	0.0983071	0.25807	-0.0448026	0.0444067	-0.0244484	0.0135349	-0.224704	0.482069	0.518564	-0.0293659	0.131457	0.417141	-0.0332658	0.250971	-0.104555	-0.270309	0.0703636	0.0431989
1-[2-(2,5-dimethyl-1H-pyrrol-1-yl)-4-nitrophenyl]-1H-imidazole	-0.200818	-0.0538553	0.192288	0.00916426	-0.085957	0.135389	0.0781552	0.0359402	0.340907	-0.208543	-0.244	-0.257977	-0.165678	-0.233328	-0.234551	0.0859532	0.141181	-0.116123	0.0417448	-0.226543	0.506018	-0.339787	0.370068	0.106566	-0.17441	0.00636651	-0.0445013	-0.357729	0.109787	0.319772	-0.233316	0.00906879	0.221941	0.242678	0.686487	-0.368003	0.536535	-0.0651887	0.529523	0.283306	0.21613	0.0240573	0.137637	-0.242264	-0.0446948	-0.00186919	-0.137345	-0.00765574	0.182382
3,6-bis[(1H-indol-3-yl)methyl]piperazine-2,5-dione	0.209568	-0.213768	-0.114358	0.0788678	0.0309913	0.189135	-0.126358	0.310358	0.117374	-0.0308646	0.0625882	-0.18864	-0.263827	-0.0174563	-0.164317	0.164779	-0.0675041	-0.252121	0.0954007	0.0523351	-0.144794	0.183726	-0.135553	-0.0954271	0.212336	-0.107273	0.0142975	-0.35411	0.0309058	0.210515	-0.194704	0.365827	-0.210051	0.0299437	-0.24705	-0.376975	-0.0119045	-0.172301	-0.147043	0.0296177	0.0166658	-0.123764	-0.0768246	0.0695606	0.0914364	-0.140078	0.591266	0.00846899	-0.164237
PC (19:2/18:4)	0.366756	-0.0658157	-0.354502	0.528372	-0.0745173	-0.190855	-0.334529	0.167581	-0.140956	0.113343	0.295788	-0.0779289	-0.0778572	0.40274	-0.0294677	-0.00313553	0.141566	-0.145401	0.00676589	0.304809	-0.0135122	0.0737088	-0.256332	-0.488483	0.383739	-0.285159	-0.113186	0.209279	-0.374863	-0.155619	-0.0864415	0.175341	-0.292423	-0.26813	-0.0793112	0.139326	-0.208025	0.0709495	-0.0705033	-0.30412	-0.0214784	-0.256926	-0.0104578	0.308723	0.115801	-0.154357	0.242022	0.363619	-0.344995
PC (18:0/20:5)	-0.497543	0.120286	0.235141	0.20999	-0.00745396	0.0602547	0.177633	-0.30722	-0.0325832	-0.0983802	-0.231428	-0.353682	0.12663	-0.0938729	0.133638	-0.146559	0.00196477	-0.304688	-0.138329	-0.244405	0.0878432	-0.0218082	-0.0186357	0.444426	-0.351226	0.131181	-0.0973863	-0.204314	0.324944	0.148108	-0.346207	-0.154091	0.166632	0.0289593	0.299168	-0.175097	0.0911537	0.157903	-0.107398	-0.135313	0.211836	0.0178224	-0.461028	-0.214196	-0.162876	0.302449	-0.137851	-0.145031	0.25795
3-(2-thienyl)cinnoline-4-carboxylic acid	0.260385	-0.532797	0.236065	0.314578	-0.4247	0.269369	0.298668	-0.148083	-0.360207	-0.137328	0.199922	0.00241823	-0.0625971	-0.0552859	0.0483432	-0.289489	-0.114769	-0.0772567	0.194972	0.209773	-0.158012	-0.385187	0.00940981	-0.322065	0.297134	-0.238249	-0.100178	-0.0250956	-0.281076	-0.195759	-0.00876108	0.484255	-0.07732	-0.200683	-0.331188	-0.0266801	-0.101096	-0.281521	-0.0212605	0.12192	-0.328789	0.0702725	0.155223	0.183107	0.168489	0.11591	-0.0184806	0.362594	-0.071818
GSSG	0.0979693	-0.362609	0.396397	0.0223526	-0.386309	0.373936	0.136513	-0.297661	-0.346587	-0.183366	0.116393	0.0436454	0.053641	0.0185862	0.175672	-0.458996	-0.467649	-0.00981058	-0.0845987	0.0967837	-0.0717045	-0.439419	0.157887	0.0137293	0.0766393	-0.197014	-0.494505	-0.113262	-0.0992316	-0.165783	0.0391016	0.156602	0.071467	-0.119891	-0.148937	-0.0792034	-0.0890449	-0.0209834	0.103858	0.204598	-0.220467	-0.0355855	0.248126	0.125164	-0.0103152	0.0671878	-0.244127	0.153694	0.028352
Gibberellic acid	0.52149	-0.328569	0.0354451	0.247755	-0.275467	-0.00613815	-0.0481358	-0.299673	-0.278834	-0.32866	0.424371	-0.00435506	-0.145992	0.453293	-0.0332582	-0.311122	-0.466485	-0.0758381	0.247254	0.384928	-0.273104	-0.118809	-0.285067	-0.224066	0.24662	0.277646	-0.181727	-0.131809	-0.293249	-0.198029	-0.0168956	0.119341	-0.343242	-0.271572	-0.185695	-0.136682	-0.221736	0.424998	-0.18858	-0.168689	-0.354826	-0.0799406	-0.119379	0.482168	-0.16829	-0.150167	-0.254948	0.417586	-0.161208
3-hydroxy-3-methylpentanedioic acid	0.4021	-0.0974278	-0.273592	0.000980185	0.230053	-0.367875	-0.0906945	0.48379	0.344884	0.101723	0.0044723	-0.102677	0.121724	0.0213135	0.155161	0.32331	-0.229129	-0.144177	0.0259322	0.0132847	-0.469565	0.157174	-0.560868	-0.0717062	-0.257372	0.257415	0.0627167	-0.0231585	0.204898	-0.124914	-0.113744	-0.117734	-0.565431	0.333258	-0.317865	-0.0406498	-0.0941437	-0.103153	-0.420644	-0.437687	-0.0898204	0.139125	-0.274784	0.0202741	-0.546075	0.08247	-0.381283	0.106171	-0.168133
PC (16:0/16:1)	0.090877	-0.155078	0.0756413	0.0850638	-0.010964	0.127567	-0.206195	-0.273243	-0.293877	0.119086	0.577691	0.686972	-0.04444	-0.0365223	0.0229531	-0.451836	-0.10183	0.626894	-0.180045	0.573265	0.0120524	-0.246005	-0.0997629	-0.188219	0.650968	-0.128694	-0.263637	-0.0852665	-0.291413	0.052976	0.685596	0.425353	-0.0459873	-0.161109	-0.160195	-0.0658925	-0.0106458	0.298941	-0.115109	-0.164912	-0.123751	-0.0649556	0.0741841	0.534734	0.510474	-0.178231	0.287966	0.33985	-0.09236
7-(1-pyrrolidinyl)pyrimido[4,5-d]pyrimidin-4-amine	-0.189147	0.0234729	0.0503119	0.209057	-0.122022	0.137349	0.255888	-0.180295	-0.521166	-0.301127	-0.103435	-0.118285	-0.293614	0.172738	-0.283815	-0.212748	0.354972	-0.147939	0.176678	-0.10101	0.0542215	0.0800706	0.156496	0.0590702	0.0338181	0.0624129	0.221732	0.538246	-0.138466	-0.313635	-0.125765	0.0335599	0.272241	-0.253911	-0.10684	0.532116	-0.0411801	-0.105777	-0.0861793	0.0545182	-0.244966	-0.124796	0.011714	-0.126298	0.23316	-0.0749246	0.236169	-0.0896531	0.0564406
3-phenyl-5-[3-(trifluoromethyl)-1H-pyrazol-1-yl]-1,2,4-thiadiazole	-0.477957	0.599207	-0.27724	0.0337364	0.275911	-0.0317181	-0.313315	0.0873209	-0.0393692	0.0118833	-0.219629	-0.179254	-0.0590073	0.0251956	-0.0448808	0.0208605	0.154614	-0.0617419	-0.342225	-0.220188	0.48971	0.329712	0.29053	0.343613	-0.0817233	0.146925	-0.0168872	-0.145173	0.133491	-0.0767691	-0.160971	-0.367965	0.252512	0.324573	0.579444	-0.133846	0.392578	0.311142	0.282276	0.0360776	0.0331017	-0.0285881	0.0296949	-0.215753	0.0946772	-0.222412	0.283279	-0.169622	0.244706
4-methyl-5-oxo-2-pentyl-2,5-dihydrofuran-3-carboxylic acid	-0.022582	0.0766484	-0.258591	0.110999	0.39804	-0.136023	0.0911351	-0.154314	-0.195042	0.419443	0.129903	0.131387	0.525835	-0.188245	0.606076	-0.269691	0.189902	0.126011	-0.0743262	0.164261	-0.114414	-0.0946438	-0.199393	0.0112241	0.114896	0.0722397	-0.0517777	-0.312848	-0.0294397	-0.169154	0.12977	0.562648	-0.07818	0.0647636	-0.128644	-0.32641	0.269286	-0.031155	-0.116047	-0.0922608	-0.0473307	0.431569	-0.011282	0.11407	-0.1399	0.330219	-0.19566	0.198498	0.360559
ACar 20:1	0.281099	-0.265579	0.127441	0.0841097	-0.0648565	-0.116959	-0.38969	-0.168718	0.298345	0.207572	0.628548	0.816212	-0.0947618	0.0904778	-0.181271	-0.0912526	-0.12461	0.76385	-0.163477	0.638891	-0.1334	-0.280301	-0.333196	-0.223156	0.535232	-0.248286	-0.163464	0.0344765	-0.146258	0.476344	0.815965	0.118265	-0.32047	-0.165423	-0.142035	0.0215414	-0.246903	0.277991	-0.168756	-0.381024	0.261872	-0.157248	-0.0993309	0.589214	0.484893	-0.26472	-0.0391668	0.373646	-0.384428
PC (16:1/16:1)	0.300816	0.0729415	-0.393203	0.018987	0.291194	-0.190528	-0.482587	0.336122	0.287839	0.490987	0.220027	0.212754	0.284712	-0.0755794	0.336171	0.200068	-0.18471	0.176047	-0.349773	0.244691	-0.123543	0.042003	-0.209288	-0.168503	0.251328	-0.327298	-0.314675	-0.424724	0.0283982	0.121652	0.212297	0.353216	-0.306063	0.122986	-0.147908	-0.456568	-0.00606936	0.0351533	0.0391168	0.00754256	0.126756	0.0653369	0.102741	0.219705	-0.00452703	0.00679665	0.111678	0.181037	-0.18419
1-(4-fluorophenyl)-4-[(2-phenyl-1H-imidazol-4-yl)methyl]piperazine	0.321419	-0.313068	-0.0343249	0.390474	-0.325344	0.149032	-0.14861	-0.207957	-0.217958	0.103644	0.484743	0.179599	0.0517145	0.437251	0.172072	-0.0443142	-0.335384	0.10712	0.171217	0.488792	-0.275699	-0.036179	-0.148735	-0.335521	0.542751	-0.421384	0.0152419	-0.315758	-0.24191	-0.0667813	0.167484	0.280353	-0.433538	-0.131795	-0.360761	-0.340513	-0.360415	0.0199147	-0.0342542	-0.00515943	-0.18153	0.233402	0.056002	0.498516	0.278995	-0.160694	-0.130318	0.454865	-0.129473
4-(anilinomethylidene)-3-methyl-4,5-dihydroisoxazol-5-one	0.216807	-0.243034	0.301353	0.102335	-0.405528	0.0251024	-0.0758974	-0.204382	-0.149463	-0.369224	0.29108	0.303265	-0.313445	-0.10747	-0.342529	-0.235298	-0.23428	0.355634	-0.0568553	0.275826	0.522239	-0.678097	0.399254	-0.274138	0.350354	-0.227429	-0.45824	0.0398773	-0.180422	0.0286364	0.318222	0.0825537	0.298683	-0.0176094	0.439088	0.0605034	0.136536	0.278536	0.578682	0.311601	-0.0864319	-0.229285	0.321353	0.289679	0.336607	-0.254224	-0.156001	0.286717	-0.333486
SM (d20:1/12:1)	-0.00156667	-0.126009	0.237316	-0.139918	-0.018455	0.0406822	0.0280657	0.170325	0.33185	-0.164087	-0.425241	-0.378836	-0.113806	-0.415122	-0.170918	0.137172	-0.0644164	-0.328092	-0.196296	-0.422969	0.35732	-0.409179	0.417288	0.204319	-0.35439	-0.226004	-0.360764	-0.0553511	0.374018	0.341077	-0.365764	-0.0324927	0.438977	0.200961	0.300181	-0.0517599	0.245012	-0.311049	0.507093	0.498709	0.359093	-0.218591	0.208314	-0.413207	-0.0972872	-0.0122924	-0.0695206	-0.278213	-0.15995
6-(3-hydroxybutan-2-yl)-5-(hydroxymethyl)-4-methoxy-2H-pyran-2-one	0.213435	-0.122318	-0.0534098	0.1568	-0.279195	-0.0057345	0.0727069	-0.0595809	-0.174656	-0.0681959	0.17398	0.143493	-0.199719	0.330054	-0.251461	0.0138507	0.229496	0.0916461	0.308519	0.186029	-0.141937	0.132063	-0.0530864	-0.41074	0.260444	-0.00325251	0.405588	0.494311	-0.490465	-0.200011	0.131179	-0.0632015	-0.134617	-0.392821	-0.235328	0.464146	-0.289747	-0.0655805	-0.110783	-0.0962033	-0.260208	-0.083249	0.124018	0.157755	0.259265	-0.154447	0.112988	0.214831	-0.139269
β-Asarone	0.0372887	-0.338909	0.439253	-0.0972703	-0.349586	0.463398	-0.0976351	-0.0617037	0.0660994	-0.61237	-0.0250021	0.0386343	-0.596853	0.174468	-0.597955	-0.159694	-0.30515	0.116961	0.0560494	-0.0235678	0.373916	-0.518113	0.527019	0.0571611	0.0480499	0.0141445	-0.144273	-0.0338075	-0.109325	0.140119	0.0545378	-0.153431	0.164568	0.181811	0.408125	-0.0255979	0.392231	0.0035855	0.558395	0.40426	-0.186908	-0.154523	0.480067	-0.0367895	0.167915	-0.557296	-0.27272	0.10734	0.0381732
Cyclohexylsulfamate	0.300255	-0.0350204	-0.239557	0.167586	0.512382	-0.460499	-0.208961	-0.197747	0.137626	0.329297	0.325637	0.151105	0.409584	-0.000214147	0.415308	-0.238873	-0.00924508	0.100387	-0.120151	0.332214	-0.282812	-0.145756	-0.607773	-0.139671	0.0607709	0.401955	-0.129994	-0.152068	-0.106123	0.172371	0.1449	0.389078	-0.289012	-0.1997	-0.125279	-0.17574	0.0716886	0.383338	-0.408319	-0.505217	0.160253	0.0460907	-0.431632	0.343694	-0.348105	0.188171	-0.303768	0.3117	0.0296274
9-Oxo-10(E),12(E)-octadecadienoic acid	-0.108693	0.0205317	0.111356	-0.147854	-0.360863	0.289216	0.279926	-0.226664	-0.192757	-0.0410106	-0.0374362	0.177276	-0.0936506	-0.187826	-0.105582	-0.0551357	0.154442	0.254413	0.183537	-0.0277781	0.369952	-0.0519829	0.616068	0.140857	0.27224	-0.343326	0.0997844	-0.196778	0.0342367	-0.0678637	0.187317	-0.0119463	0.349952	0.196315	0.143087	-0.182664	0.109872	-0.259255	0.602613	0.63316	-0.063002	0.311163	0.602932	-0.0508823	0.556209	-0.155965	0.121022	-0.0354778	0.123318
DAG (18:2/20:5)	0.167381	-0.176007	0.161308	-0.0817564	-0.315855	0.251352	0.141875	-0.041571	-0.16733	-0.293542	-0.190054	-0.143366	-0.252965	-0.173715	-0.228999	-0.0753391	-0.130572	-0.136468	0.00385048	-0.184763	0.230251	-0.281866	0.570742	0.0382447	0.035351	-0.191536	-0.17902	0.00627148	-0.0313672	-0.112298	-0.141241	0.124132	0.39733	-0.0230446	0.015474	0.0160455	0.110083	-0.242575	0.548109	0.755058	-0.231605	-0.0599442	0.548109	-0.186423	0.227726	-0.168538	0.0669435	-0.0303484	-0.0934279
4-[(4-phenethyl-1,4-diazepan-1-yl)sulfonyl]-2,1,3-benzoxadiazole	-0.505888	0.410686	-0.133435	-0.38068	0.508744	0.259503	0.0205655	-0.0481439	-0.14622	0.144738	-0.386524	-0.327254	0.17752	-0.0139018	0.21123	-0.165492	0.387079	-0.250621	0.041613	-0.394295	0.356446	0.297723	0.386907	0.200632	-0.180768	0.285485	0.28539	-0.0807197	-0.0877616	0.00335411	-0.316934	-0.0581614	0.422525	0.108504	0.279367	-0.0759163	0.502022	-0.120574	0.203551	0.185215	0.133658	0.108631	0.26733	-0.384015	-0.129902	-0.118347	0.340711	-0.425345	0.647322
Ciprostene	0.0308441	-0.0365366	0.0776304	0.0628859	-0.309109	0.13846	0.0165311	-0.06132	0.225766	-0.0144815	-0.207652	-0.221671	-0.102876	-0.00746834	-0.115509	-0.0344491	-0.106008	-0.254499	-0.156332	-0.203649	-0.229172	0.287226	-0.0213886	0.288879	-0.177527	0.157906	0.0788486	-0.00596833	-0.0236121	0.101847	-0.229309	-0.432998	-0.0905533	-0.138548	-0.150872	0.00227454	-0.200269	-0.0620538	-0.110503	0.0114758	-0.0738258	-0.132023	0.0173082	-0.195901	0.123784	-0.0444941	0.181493	0.0507593	-0.012859
DAG (16:0/18:1)	0.0996723	-0.233776	0.265102	-0.081454	-0.359731	0.216093	0.233642	-0.105269	0.00920076	-0.232316	-0.0483259	-0.0246324	-0.115949	-0.0643934	-0.0903387	-0.286638	-0.203258	-0.0343833	0.0447928	-0.0571534	-0.157615	-0.0703115	-0.0283812	0.0883946	-0.139244	0.372606	-0.0205863	0.0272468	-0.193124	-0.136635	-0.0282766	-0.271554	-0.107864	-0.0414153	-0.0444443	0.0586723	0.0256274	0.0120401	-0.114133	-0.0982308	-0.327591	-0.0405132	0.117181	-0.0471271	-0.0999684	0.0301396	-0.12755	0.177519	0.118648
PC (18:2/18:2)	0.00600153	0.0652844	-0.049388	-0.199684	-0.0117893	0.108121	-0.0557256	-0.248429	-0.21053	0.237996	0.562894	0.856606	0.12171	0.0360853	0.131055	-0.295278	0.0351711	0.846116	0.0205564	0.56396	-0.0629846	0.00945735	-0.1297	-0.129149	0.558946	-0.0218794	-0.0684823	-0.21263	-0.315971	-0.0951218	0.858501	0.343932	-0.178879	-0.146062	-0.0791708	-0.199434	-0.0105765	0.360049	-0.126834	-0.150074	-0.18276	0.181868	0.165698	0.525042	0.356024	0.0391102	0.157125	0.247364	0.127647
5-Methyl-dl-tryptophan	0.105165	-0.551367	0.272817	0.283353	-0.0872044	0.310147	0.00604518	-0.0671689	0.0404805	-0.179005	0.316323	0.141824	-0.206029	0.184091	-0.100462	-0.138208	-0.267052	0.0782009	0.132984	0.328621	-0.388044	-0.299126	-0.378924	0.0358142	0.187863	-0.0657286	-0.064759	-0.354911	0.089951	0.239125	0.13582	0.485068	-0.470661	0.050495	-0.292501	-0.370389	0.0270613	-0.0794433	-0.379116	-0.286035	-0.0533646	0.107383	-0.303977	0.291921	-0.00676374	-0.0327731	-0.204648	0.287584	0.0315639
PC (18:1/19:2)	-0.229525	0.0537757	0.0260019	0.172371	0.19255	-0.223599	0.210384	0.0143918	-0.105577	-0.0611584	0.0106853	0.0246527	0.0960648	-0.250423	0.0796353	-0.131628	0.242789	0.0651924	-0.0211424	0.0183522	0.0966545	-0.213388	-0.248291	-0.00420753	-0.157068	0.274314	-0.0512534	0.0974657	0.0766343	-0.130446	0.0316476	0.182983	0.021656	0.0943933	0.255096	0.109973	0.275152	0.151042	-0.245304	-0.40919	-0.0226365	0.0369953	-0.406254	-0.0143263	-0.259465	0.369253	-0.17498	0.061246	0.123789
PC (18:4e/4:0)	0.609433	-0.495459	0.156583	0.473339	-0.71396	-0.00987622	-0.0921678	-0.125971	-0.0330603	-0.333049	0.359983	0.00691506	-0.375668	0.322537	-0.373097	-0.00442554	-0.348098	-0.0495632	0.186549	0.353104	-0.0535121	-0.305963	-0.00436313	-0.50934	0.38561	-0.243616	-0.108301	0.113893	-0.40189	-0.0216574	-0.00149529	-0.0326952	-0.242705	-0.340372	-0.0782768	0.0894635	-0.392309	0.11981	0.18739	0.0892751	-0.255361	-0.245669	0.111949	0.388581	0.284518	-0.267448	-0.135279	0.55241	-0.543822
Nobiletin	-0.166035	0.210134	-0.161462	-0.122484	0.0232195	-0.242346	0.502498	-0.0526066	0.0369044	0.0775313	-0.115409	-0.0421406	0.116551	-0.0387912	-0.00347054	0.501857	0.477796	0.0438009	0.669434	-0.105754	-0.00639956	0.406082	0.0377752	-0.0891603	-0.0677129	0.135105	0.92059	0.017795	0.118751	-0.081177	-0.0420183	-0.150747	-0.0075591	0.170287	-0.00155366	0.013051	-0.0917997	-0.233803	0.00036782	0.0776512	0.0270018	0.577084	-0.155745	-0.111656	0.0293679	0.169768	-0.154108	-0.178736	0.199351
PC (15:0/16:0)	0.15917	-0.0851582	-0.063961	-0.0395428	0.0505763	-0.185093	-0.0467746	0.149737	0.311522	0.253969	0.055373	0.0884015	-0.00997368	0.122455	-0.131259	0.244893	0.396105	0.0525787	0.216667	0.0545358	-0.0529248	0.142563	-0.215741	-0.15556	0.0731837	-0.355327	0.167852	0.383817	0.0916657	0.350444	0.0836217	-0.173305	-0.121652	-0.0545255	-0.177762	0.32921	-0.327031	-0.33763	-0.133486	-0.325411	0.595814	-0.160632	-0.0401709	0.0515267	0.146634	-0.121722	0.144988	-0.162174	-0.314256
trans-3-Indoleacrylic acid	0.034585	-0.210539	0.308439	-0.352445	0.286821	0.0445616	0.113192	-0.0905954	0.252199	-0.103331	-0.268715	-0.195328	0.0345813	-0.51037	0.0121611	-0.156318	-0.144692	-0.196324	-0.1254	-0.283702	0.0816883	-0.408332	0.15924	0.19934	-0.318024	0.299964	-0.195887	-0.131666	0.22166	0.4303	-0.190645	0.194477	0.39592	0.0312853	0.0273136	-0.0955188	0.312803	-0.115862	0.111758	0.292456	0.243779	-0.136033	-0.0104963	-0.260977	-0.236157	0.0387157	-0.0577627	-0.243351	0.073445
Serotonin	-0.529577	0.282847	0.18271	-0.261087	0.0318713	0.314917	-5.22315e-05	-0.0333169	-0.0929494	-0.188119	-0.244557	-0.128684	0.0343368	0.129152	0.0201721	-0.0685761	-0.0626077	-0.0614091	-0.128321	-0.255185	0.187211	-0.0134286	0.238321	0.134013	-0.343348	0.180624	-0.143946	-0.093566	-0.136478	-0.122017	-0.115609	-0.0212973	0.20877	-0.217655	0.468849	-0.0689977	0.263297	0.312341	0.0912398	0.147969	-0.136568	-0.153509	-0.0125629	-0.243136	-0.357248	0.284609	-0.0245738	-0.265078	0.417382
5,6-dimethyl-4-oxo-4H-pyran-2-carboxylic acid	-0.108386	-0.242575	0.349264	-0.407967	0.0133327	0.306981	0.228907	0.0765456	0.153178	-0.064647	-0.0845602	0.189853	-0.173251	-0.533118	-0.136401	-0.036042	-0.161172	0.160745	-0.0353778	-0.105973	-0.116123	-0.0430269	0.0523546	0.386963	-0.0307884	0.00344376	-0.0451124	-0.226186	0.440573	0.335944	0.189354	0.049007	0.124491	0.361896	-0.305005	-0.166204	0.0444838	-0.32499	-0.161803	0.099733	0.132977	0.0481238	-0.00868443	-0.118198	0.21494	-0.0597389	0.329861	-0.291507	-0.0149591
PC (16:0/21:1)	-0.262274	0.00172761	0.0919648	0.156751	-0.082973	0.0526332	-0.0692024	0.156407	0.213201	0.0411294	0.0584159	-0.00550603	-0.0869419	0.0877789	-0.0962067	0.101899	0.103883	0.0283629	-0.000397253	0.0459445	0.071232	0.135517	-0.246015	0.106559	-0.0114854	-0.18566	-0.0220826	-0.0678277	0.222365	0.226838	0.00207766	-0.313168	-0.256897	0.275593	0.207641	-0.0752934	-0.0535352	-0.0226072	-0.218917	-0.562998	0.358741	-0.0778738	-0.317094	0.0492103	0.0380577	-0.0106196	0.108223	-0.0413569	-0.0495266
PC (16:1e/2:0)	0.128352	-0.482221	0.288585	0.203792	-0.462402	0.35666	0.181003	0.233983	-0.04216	-0.347751	-0.0781254	-0.368796	-0.257603	0.233994	-0.119135	0.0801583	-0.419273	-0.412002	0.239827	-0.0911505	-0.290601	-0.0409855	-0.0999435	-0.0373199	-0.130516	-0.14087	0.0521256	-0.0356269	0.104924	-0.165894	-0.379089	-0.259694	-0.388644	0.306149	-0.280511	-0.0279925	-0.188111	-0.413778	-0.17703	-0.163887	-0.245088	0.0690415	-0.0280151	-0.0681897	-0.187709	-0.125518	-0.244872	0.105154	-0.0684861
Estradiol	-0.293504	0.229372	-0.110852	0.259566	0.0118087	-0.0596985	-0.0720541	-0.246875	-0.173155	0.46355	0.210057	0.142404	0.487818	0.113649	0.478445	-0.00254823	0.110521	0.095121	-0.150037	0.222233	-0.183287	0.179882	-0.241126	-0.293119	0.186327	-0.231486	0.0640305	-0.124468	-0.338161	-0.0375902	0.136374	0.325298	-0.114584	-0.575853	-0.0735871	-0.127125	-0.319902	0.290394	-0.285496	-0.185671	0.013614	0.0485022	-0.358003	0.201273	0.0678622	0.52539	0.185383	0.142212	0.131762
3-(3,4-dimethylphenyl)-3,4-dihydro-1,2,3-benzotriazin-4-one	-0.188498	-0.0241637	0.0475986	0.43169	-0.207094	0.152255	0.116272	-0.2526	-0.52547	-0.281341	0.0518567	-0.0922876	-0.273153	0.379507	-0.226095	-0.188599	0.169261	-0.124131	0.152287	0.0596738	-0.0351148	0.0934628	0.0537676	-0.0292213	0.156357	0.017202	0.295973	0.399772	-0.215836	-0.312132	-0.101314	-0.0218681	0.0495656	-0.233641	-0.12007	0.393066	-0.123818	0.0179721	-0.144414	-0.075415	-0.335163	-0.0227585	-0.111228	0.0317698	0.281837	-0.157655	0.0795273	0.123123	0.0685008
PC (18:4e/17:2)	0.00555179	-0.0336419	0.111832	0.0854276	-0.224182	-0.180671	0.389665	-0.0967251	-0.152359	-0.390096	-0.0861145	-0.257943	-0.218763	0.109475	-0.309933	0.14593	0.280853	-0.208543	0.515281	-0.116202	0.224714	-0.0543336	0.0738954	-0.127275	-0.148981	0.0578294	0.203345	0.340792	0.0766853	-0.0987317	-0.254953	-0.157403	0.186333	-0.0776931	0.254508	0.32887	-0.105897	-0.00629813	0.0890377	-0.0169408	0.109318	-0.078481	-0.187608	-0.052768	-0.131129	0.0909532	-0.151522	-0.157273	-0.155889
PC (22:3e/16:3)	-0.05079	0.234389	-0.139541	0.0314908	-0.211475	-0.176243	0.220031	0.0344466	-0.0941019	0.110269	-0.224333	-0.212517	0.139198	-0.0289456	0.0619262	0.359637	0.221651	-0.216147	0.115862	-0.225004	0.027718	0.263964	0.175498	-0.0052483	-0.131157	-0.401742	0.0867779	0.197027	0.159761	-0.170379	-0.217385	-0.102298	0.211577	-0.186668	-0.0679579	0.182904	-0.400491	-0.193799	0.162271	0.341312	0.122366	0.0205741	0.0260722	-0.200278	0.0738903	0.299663	0.11832	-0.263151	-0.205334
PE (16:2e/22:4)	0.0445064	-0.0720711	0.0183682	0.0342141	0.0550412	-0.0800169	0.0369606	0.056219	0.145816	0.0205226	-0.059726	-0.187233	-0.00834176	-0.24831	-0.0704852	0.119277	0.171045	-0.191058	0.0713594	-0.0575184	0.131233	-0.123911	0.0437954	-0.426345	0.0240512	0.128484	0.169888	-0.0163751	-0.327785	0.219342	-0.185164	0.323	0.169877	-0.37039	0.14061	-0.0202822	0.100534	0.0379588	0.0559829	0.127048	0.0269328	-0.202149	-0.131422	-0.0599683	-0.0359441	0.181062	0.324154	0.0490348	-0.0543987
ACar 15:0	0.192121	-0.233297	0.126533	0.106495	-0.0534785	-0.0754208	-0.442783	-0.0196514	0.405565	0.12687	0.500362	0.702985	-0.228746	0.0996906	-0.320036	0.0660308	-0.146005	0.660647	-0.220378	0.517586	-0.145112	-0.197916	-0.307447	-0.111412	0.421999	-0.253505	-0.100531	0.0309781	-0.0210522	0.52294	0.704042	0.0264467	-0.340838	-0.0657396	-0.116417	0.0171285	-0.216479	0.21622	-0.178885	-0.349412	0.255746	-0.193534	-0.164092	0.454706	0.476974	-0.319794	0.011452	0.290263	-0.401373
Decanoylcarnitine	0.32549	-0.288671	0.0295888	-0.0642918	-0.157324	-0.0331814	-0.20723	0.42121	0.365573	0.291543	0.262461	0.3582	0.0492303	0.0429248	0.0408814	0.421458	-0.36692	0.207696	-0.114078	0.265612	-0.67688	0.152912	-0.545726	-0.289464	0.113735	-0.421101	-0.0633681	0.0539188	0.0378657	0.176285	0.338416	0.0822905	-0.591431	-0.164699	-0.691829	0.0491432	-0.674372	-0.177529	-0.56238	-0.32443	0.0515287	-0.148631	-0.261874	0.238216	0.0108803	0.166849	0.137132	0.0562911	-0.496478
2-phenyl-2,4,6,7-tetrahydrothiino[4,3-c]pyrazol-3-ol	0.312539	-0.218887	-0.0339457	0.531096	-0.170587	-0.116856	-0.149073	-0.418869	-0.376554	-0.215231	0.667925	0.413864	-0.0809099	0.242428	0.0182698	-0.303421	-0.429895	0.374471	-0.0133229	0.676362	-0.208346	-0.336541	-0.291801	-0.306286	0.527673	0.240059	-0.130532	-0.354661	-0.379307	-0.23214	0.408616	0.591001	-0.339498	-0.307365	-0.0543452	-0.343957	-0.0139132	0.711415	-0.159231	-0.0824119	-0.616453	0.150075	-0.302371	0.669369	0.135772	0.0208406	-0.311901	0.732206	-0.0780379
PC (16:2e/24:4)	0.223566	-0.122475	-0.225505	0.118608	0.0566235	-0.184119	-0.0716173	0.326067	0.2159	0.276879	0.341138	0.163011	0.0581143	0.0483269	0.101924	0.336143	0.00302374	0.118841	0.245792	0.329083	-0.298453	0.32248	-0.548091	-0.273605	0.290406	-0.164942	0.228816	-0.246288	0.113101	0.129146	0.154988	0.0598495	-0.585582	0.267474	-0.310941	-0.265838	-0.286187	-0.105771	-0.44401	-0.56584	0.172152	0.17834	-0.358343	0.342288	0.022647	0.00656705	0.203245	0.137799	-0.241186
3b,7b-Dihydroxy-5-androsten-17-one	-0.293568	0.215775	0.00457357	0.160386	-0.383676	0.180692	0.0485984	-0.0820123	-0.109192	-0.0991002	-0.152969	-0.177024	-0.223935	0.0531293	-0.205482	0.197502	-0.0220667	-0.125935	0.0126164	-0.160674	0.181695	0.434364	0.362768	0.247352	0.102603	-0.190591	0.333231	-0.104431	0.143531	-0.0608758	-0.174702	-0.536985	0.127247	0.227043	0.08228	-0.0749167	-0.18352	-0.0719321	0.23339	0.25716	-0.11131	0.145501	0.0808582	-0.147452	0.517701	-0.268077	0.325868	-0.0723563	-0.00235073
PC (18:2/19:2)	-0.0575956	0.112757	-0.104971	-0.210549	-0.0652379	0.154331	-0.0596409	0.181267	0.0742619	0.00561443	0.0627961	0.149387	-0.264038	0.222589	-0.273353	0.288479	0.151173	0.182378	0.282845	0.0429471	0.114443	0.414335	0.119889	0.143825	0.2231	-0.321174	0.232779	-0.0645613	0.249847	0.117641	0.15295	-0.291483	-0.0963658	0.360435	-0.0316604	-0.0826456	-0.139671	-0.206437	0.100675	0.00421264	0.248825	0.0990564	0.190991	0.0646513	0.341154	-0.395183	0.331191	-0.260134	-0.0964871
5,6-dimethoxy-2-(2-methoxyphenyl)-4H-chromen-4-one	0.132739	-0.531895	0.549992	-0.0983627	-0.323821	0.382247	0.233721	-0.346928	-0.0872073	-0.238902	0.0717633	0.0445379	-0.0823256	-0.145748	-0.0569509	-0.336031	-0.275316	0.00866527	0.114205	0.0566163	0.0287706	-0.610361	0.247091	-0.0753919	0.0821085	-0.167355	-0.284782	-0.121236	-0.0924857	0.243349	0.0445214	0.333672	0.221663	-0.222693	-0.0818176	-0.0985343	0.0140458	-0.156416	0.209745	0.356217	0.0346948	-0.0904531	0.217875	0.0721815	0.0853633	0.0173507	-0.165411	0.064307	-0.0100391
Glycochenodeoxycholic Acid	0.238644	-0.46908	0.280963	-0.292673	-0.241406	0.347916	0.424096	0.181454	0.104797	-0.207746	-0.218577	-0.186204	-0.17699	-0.269607	-0.148047	0.0106641	0.00272669	-0.202004	0.347582	-0.220689	-0.0473905	-0.251834	0.21111	0.0451633	-0.129213	-0.150663	-0.0532069	-0.0993274	0.151805	0.0788443	-0.188044	0.21135	0.0760136	0.179418	-0.2071	-0.106717	0.110745	-0.640928	0.179542	0.362654	0.036552	0.0635766	0.397864	-0.219727	-0.0932834	0.0298684	0.00136013	-0.159917	-0.0035557
1-Methylhistidine	-0.24738	0.285903	-0.0704902	0.0680218	0.109315	-0.194337	-0.260775	0.210569	0.118827	0.0998751	-0.191544	-0.179793	0.167098	0.00293674	0.126138	0.157505	0.0343918	-0.0566403	-0.256712	-0.183838	0.567925	-0.1889	0.306479	-0.0824294	-0.169552	-0.296087	-0.195612	0.120416	0.130031	-0.0426302	-0.159876	-0.459061	0.201112	0.434434	0.615378	0.116844	0.247494	-0.0143904	0.503901	-0.0250449	0.284935	-0.00451821	0.175522	-0.18599	-0.126869	-0.132234	-0.350053	-0.0789053	0.000221464
Andrographolide	0.0398711	0.164407	-0.266503	-0.053699	0.134474	-0.238085	-0.177906	0.403489	0.067399	0.375808	0.245248	0.357388	0.390889	-0.0247192	0.416718	0.340545	-0.173618	0.361337	-0.135316	0.259831	-0.135404	0.0184255	-0.284357	-0.298306	0.0978514	-0.368013	-0.211581	-0.225541	0.0737756	-0.254659	0.359349	0.216545	-0.383925	0.228814	-0.0344423	-0.229551	-0.120733	0.0800476	-0.110584	-0.209173	-0.0475797	0.242662	-0.0831299	0.231185	-0.250265	0.357025	-0.236806	0.0872486	-0.107221
delta8-THC-d9	0.154394	-0.241001	0.171496	-0.0398569	-0.562514	0.410102	0.127756	0.0828188	-0.234022	-0.135548	-0.0526592	-0.00183958	-0.194419	0.0300422	-0.142916	-0.0979376	-0.0906492	-0.0194149	0.0796563	-0.0462108	0.148017	-0.144352	0.470706	-0.220113	0.209831	-0.439613	-0.108817	0.157512	-0.296986	-0.278473	-0.00411371	-0.0755366	0.133687	-0.0349583	-0.0962462	0.157552	-0.0963744	-0.396629	0.424085	0.450133	-0.292597	-0.0538781	0.69905	-0.0667727	0.328722	-0.185664	0.156103	0.0960176	-0.095575
1-(1,8-dihydroxy-3,6-dimethyl-2-naphthyl)ethan-1-one	-0.235375	-0.324985	0.516969	-0.388837	-0.234958	0.46178	0.459097	0.0964189	0.112414	-0.202234	-0.286394	-0.0410448	-0.112954	-0.38645	-0.101012	0.101768	-0.126353	-0.0118649	0.181225	-0.293788	0.0215684	-0.263687	0.309347	0.331233	-0.253165	-0.298719	-0.0543896	-0.203983	0.484775	0.191534	-0.0349896	0.0217105	0.187042	0.410732	-0.0840119	-0.163746	0.0902086	-0.590069	0.152461	0.351066	0.159336	0.194254	0.188713	-0.311274	-0.00207496	0.124201	-0.114881	-0.376007	0.11783
6-Ketoprostaglandin F1α	-0.44872	0.287089	0.0212722	0.308181	-0.00156939	0.0715737	-0.135907	-0.289557	-0.363257	-0.10578	0.0481154	0.123654	-0.0972199	0.175847	-0.0877309	-0.231835	0.0591501	0.122092	-0.334347	0.0583388	0.0601389	0.0763044	0.0368048	0.24919	0.0563627	0.0468806	-0.0781962	0.162947	-0.0586071	-0.158488	0.125273	0.0102538	0.161901	-0.268285	0.142194	0.181336	-0.00596204	0.414054	-0.134198	-0.0683112	-0.199922	-0.142568	-0.258203	0.0199193	0.256794	0.0473585	0.150508	0.033844	0.121185
PC (4:0/18:5)	0.155462	-0.112847	-0.139169	0.534048	-0.18394	-0.123996	-0.207711	-0.0767481	-0.0755528	0.246869	0.364864	0.101382	0.0430718	0.282435	0.0558256	0.0422287	0.0439038	-0.00501923	-0.0236557	0.375489	-0.306298	0.189087	-0.406267	-0.459116	0.405501	-0.222452	0.186494	0.144784	-0.402965	0.038188	0.0853337	0.138583	-0.36472	-0.481748	-0.332724	0.116029	-0.487194	0.131397	-0.394123	-0.401784	-0.0559906	-0.144104	-0.346197	0.355165	0.307466	0.0387716	0.303052	0.390707	-0.276781
4-Phenyl-3-buten-2-one	-0.359394	0.104563	0.190276	0.255917	-0.359993	0.296401	0.166227	-0.281647	-0.539717	-0.356623	-0.224623	-0.285405	-0.300115	0.20949	-0.275217	-0.26509	0.162759	-0.284876	-0.0159559	-0.235113	0.252296	0.0732847	0.42318	0.168878	-0.0249288	-0.0981082	0.0459152	0.455239	-0.130892	-0.290231	-0.287052	-0.277559	0.430209	-0.24547	0.113554	0.470437	-0.0873503	-0.0310415	0.16647	0.225341	-0.213278	-0.230599	0.12988	-0.230349	0.334539	-0.144321	0.266804	-0.123555	0.0673172
(2S)-2-(2-hydroxypropan-2-yl)-2H,3H,7H-furo[3,2-g]chromen-7-one	-0.503588	0.499033	-0.103721	0.0562798	0.0300778	0.0930536	-0.151101	-0.0977206	-0.196434	-0.0835369	-0.18376	-0.136435	-0.123745	0.0740678	-0.110516	-0.0782733	0.122903	-0.051738	-0.250075	-0.19666	0.401263	0.339144	0.320899	0.368636	-0.0366199	0.0816273	0.0114797	-0.0214136	0.0902361	-0.115011	-0.123973	-0.425895	0.300985	0.151712	0.435149	0.00390647	0.174629	0.284758	0.205594	0.0668107	-0.0256969	-0.0728967	0.0166932	-0.180358	0.240077	-0.187549	0.338079	-0.182499	0.19913
ACar 18:1	0.29571	-0.41773	0.27031	0.140343	-0.25525	0.0141496	-0.366671	-0.138475	0.341672	0.111938	0.610329	0.735129	-0.211519	0.0917871	-0.28904	-0.0537493	-0.21612	0.675659	-0.130267	0.616726	-0.118834	-0.35316	-0.269281	-0.286335	0.554604	-0.367705	-0.172339	0.0114949	-0.167608	0.555132	0.73481	0.0792134	-0.333588	-0.174872	-0.144393	0.00204609	-0.305243	0.181057	-0.119412	-0.331235	0.263972	-0.227184	-0.0786886	0.570585	0.553724	-0.310564	0.0105484	0.401117	-0.460235
ACar 14:1	0.127395	-0.168115	0.0845285	0.0905842	-0.296396	0.00924024	-0.331484	0.293735	0.318316	0.152727	0.34151	0.514317	-0.209394	-0.0688177	-0.28993	0.315193	-0.0955851	0.484624	-0.189532	0.358674	0.0351936	-0.139279	-0.061295	-0.44001	0.427082	-0.559333	-0.0984964	0.0475151	-0.18497	0.289115	0.517555	0.0703035	-0.21807	-0.106599	-0.015236	0.0402368	-0.277422	0.0164804	0.0428736	-0.0885942	0.0995045	-0.250936	0.0281154	0.292557	0.488437	-0.105276	0.317462	0.222068	-0.492732
Oleoyl ethylamide	0.110795	-0.534288	0.513512	-0.220768	-0.336133	0.317292	0.376399	0.0133587	0.199494	-0.317073	-0.0343062	0.0138617	-0.310544	-0.0172358	-0.379227	0.117276	-0.0320721	-0.0592979	0.390121	-0.0549537	-0.309572	-0.230228	-0.128081	0.0270674	-0.16294	-0.188061	-0.0345639	0.112377	0.172663	0.360145	0.00636655	0.234457	-0.0671122	-0.284908	-0.298291	0.103931	-0.29421	-0.337188	-0.256471	0.0398618	0.235522	-0.242494	-0.158254	-0.039727	-0.0866358	0.205939	0.0298261	-0.249374	-0.213542
N-Acetyl-L-tyrosine	0.133477	-0.108861	0.0365333	0.0474878	0.0830281	0.0239273	-0.137723	-0.0903967	0.0567419	-0.123032	-0.110987	-0.0431566	-0.197434	-0.0886721	-0.226859	-0.232429	0.154746	0.0204559	-0.116006	-0.0825442	0.4574	-0.428244	0.44764	0.0825421	0.0786553	-0.0519522	-0.13658	0.142703	-0.016016	0.151974	-0.030819	-0.0256072	0.357377	0.213408	0.292261	0.117187	0.44849	-0.190054	0.595498	0.347397	0.131289	-0.0493324	0.522021	-0.123902	0.246418	-0.481066	-0.176072	0.0956632	0.0112636
Kojic acid	-0.168841	0.334326	-0.276415	-0.0245527	0.451192	-0.350744	-0.17548	-0.131385	0.140583	0.900835	0.0679886	0.152911	0.91423	-0.167063	0.89656	-0.063562	0.156369	0.133287	-0.349541	0.0842469	-0.132811	0.174584	-0.312873	-0.062046	-0.00865201	-0.19661	-0.0596416	-0.114188	0.00949283	0.116536	0.149802	-0.0321922	-0.0926686	-0.0258112	-0.135225	-0.116457	-0.165047	0.000378402	-0.206002	-0.386118	0.459372	0.263268	-0.148857	0.0678615	-0.122369	0.379973	-0.136286	0.00591817	0.197058
SM (d18:2/21:0)	-0.0944042	0.278592	-0.290779	-0.158084	0.333271	-0.232844	-0.143558	0.558987	0.141656	0.0483382	0.0560099	0.276294	-0.103628	-0.313257	-0.116864	0.357261	0.0750034	0.298363	-0.180153	0.0634531	0.00969436	0.179785	-0.227864	-0.036477	0.00100799	0.121854	-0.0487596	-0.11499	0.180023	-0.112229	0.283111	0.250133	-0.131141	0.255679	0.100382	-0.101632	0.188483	0.197913	-0.225596	-0.173522	-0.143496	-0.0402478	-0.265668	0.0193399	-0.114051	0.198025	0.346171	-0.111117	-0.134228
Isophorone	-0.134001	-0.034811	0.0374813	0.501666	-0.261677	0.129291	0.0853943	-0.292781	-0.582395	-0.273032	0.11895	-0.0227738	-0.29531	0.339553	-0.246931	-0.280864	0.195791	-0.0657532	0.0721771	0.12605	0.0231264	0.0216062	0.0646021	-0.0176337	0.247795	-0.0861002	0.113625	0.419573	-0.217045	-0.315753	-0.0311589	0.0584746	0.102262	-0.294984	-0.100425	0.407917	-0.147808	0.0657323	-0.0978822	-0.0561058	-0.299749	-0.114384	-0.0694586	0.0979752	0.387002	-0.146286	0.164829	0.170484	-0.0349403
11-α-Hydroxy-17-methyltestosterone	-0.19346	0.187665	-0.113136	-0.50307	0.351237	0.153423	0.0635727	0.136685	0.448497	0.325127	-0.275151	-0.200777	0.223895	-0.233074	0.187683	0.276316	0.189956	-0.166844	0.149557	-0.27991	-0.0688665	0.430012	0.0277662	0.137477	-0.191478	0.224758	0.38213	-0.524695	0.0676784	0.413186	-0.196544	0.0911664	0.0120031	0.0252854	0.00423529	-0.52563	0.184867	-0.171732	-0.0413043	0.168834	0.292588	0.174699	-0.00350225	-0.259985	-0.178355	0.157312	0.41158	-0.354776	0.380243
Cafestol	0.0503843	-0.350464	0.288793	-0.126222	-0.555396	0.456996	0.262899	0.398572	0.106287	-0.371246	-0.106983	-0.00740594	-0.453061	-0.107888	-0.431686	0.322237	-0.211737	-0.0285554	0.200422	-0.101148	-0.17307	-0.0366275	0.139625	-0.0488338	-0.0385721	-0.258884	0.0154772	-0.147314	0.0396024	-0.0763175	-0.00920401	0.146625	-0.167515	0.0392281	-0.1527	-0.136699	-0.105253	-0.345262	0.0166881	0.324342	-0.34229	-0.0615515	0.158897	-0.133973	0.0715819	0.125912	0.229327	-0.0524782	-0.158172
L-Tyrosinemethylester	-0.301387	-0.176933	0.407755	0.238459	-0.182982	0.294348	0.00775179	-0.464426	-0.0670244	-0.194264	-0.0324852	-0.0631057	-0.0557261	0.206008	-0.0584945	-0.203345	-0.145447	-0.0210201	-0.0681576	-0.0185362	0.146713	-0.407284	0.27194	0.294909	-0.0453301	-0.26369	-0.124006	-0.127934	0.174931	0.258815	-0.05465	-0.00244059	0.170718	-0.0102258	0.211798	-0.126547	0.0872039	-0.010384	0.268699	0.217741	0.187226	0.0864611	-0.00707143	-0.0371541	0.167533	-0.112337	-0.462535	0.0319668	0.185795
SM (d29:1/13:1)	-0.183067	0.546531	-0.406797	-0.109133	0.495427	-0.357944	-0.293146	0.134954	0.210678	0.275873	-0.196966	-0.147274	0.226384	0.0679889	0.185988	0.175937	0.108697	-0.115018	-0.253128	-0.196222	-0.0507052	0.543645	-0.187284	0.203182	-0.274532	0.447439	0.26397	0.0825498	0.0751904	-0.0249501	-0.147229	-0.471781	-0.0539518	0.118679	0.0936702	0.0867782	0.0528119	0.267187	-0.206205	-0.289317	0.0738757	0.0220972	-0.243259	-0.18017	-0.232191	-0.0623287	0.0595174	-0.167161	0.163873
N-Benzylformamide	-0.0321751	0.150861	-0.127846	0.0483843	-0.0119655	-0.259565	0.189499	0.0267627	0.153101	0.132962	-0.206294	-0.059254	0.0364895	-0.288257	-0.00808775	0.234446	0.17495	-0.0252657	-0.0256178	-0.195084	-0.00175296	0.260693	0.0372851	0.510864	-0.137867	-0.167859	0.137305	0.0135005	0.644303	0.0623001	-0.0598524	-0.400487	0.0806544	0.510871	-0.136887	0.0191271	-0.144943	-0.332104	0.0671005	0.0665017	0.274792	0.292825	-0.0339262	-0.204447	0.257997	-0.0629184	-0.0706112	-0.185601	-0.153351
Stevioside	0.0772888	0.451832	-0.573235	-0.109839	0.54211	-0.581803	-0.283976	0.29056	0.409155	0.525355	0.0811257	0.158339	0.37711	-0.0132386	0.269916	0.401505	0.294305	0.183438	-0.0608104	0.101658	-0.130303	0.445396	-0.433445	-0.216807	-0.0390041	0.274357	0.319713	-0.0458244	-0.0855034	0.0620297	0.15894	-0.0356176	-0.303668	-0.0138006	0.0583271	-0.0789272	-0.00146442	0.261217	-0.255662	-0.390871	0.173107	0.124713	-0.286557	0.086646	-0.257528	0.184875	0.0413773	0.0199859	0.00915651
α-ketoisovaleric acid	0.298356	0.0637984	-0.349278	-0.0845801	0.530268	-0.502452	-0.173087	0.443549	0.36335	0.268913	0.000898559	-0.0156731	0.332295	-0.189519	0.334952	0.271807	-0.127696	-0.0411374	-0.164469	0.0170351	-0.332939	0.00761231	-0.535982	-0.0960054	-0.280113	0.287056	-0.113249	-0.118229	0.200523	-0.0352373	-0.020199	0.198658	-0.367659	0.215312	-0.156021	-0.133373	0.094463	0.0632157	-0.350192	-0.34538	0.034272	0.100069	-0.333092	0.0101057	-0.636487	0.288621	-0.34022	0.0415433	-0.0928118
SM (d21:2/21:0)	-0.120228	0.404277	-0.272249	0.00360905	0.18702	-0.21757	-0.285049	-0.0418443	0.185299	0.204468	-0.0551295	-0.0205973	0.084753	0.165028	0.0324938	0.0479443	0.0866463	0.00650833	-0.202815	-0.05412	-0.0178555	0.481911	-0.11761	0.144143	-0.0713088	0.354633	0.271407	0.0930413	-0.103461	0.0359609	-0.0206249	-0.548569	-0.0900393	-0.0148776	0.110686	0.0950673	-0.0453915	0.3054	-0.126236	-0.274416	0.0267212	-0.0347285	-0.123095	-0.0429326	0.0494568	-0.190777	0.118575	0.0165311	0.101359
PC (16:0e/9:0)	0.0561911	-0.0663299	0.113695	-0.0278627	0.012478	0.0399422	-0.0515488	-0.0132434	0.157914	0.0440597	-0.336327	-0.47594	0.199324	-0.152118	0.177606	-0.11791	-0.028626	-0.468109	-0.221343	-0.334883	0.240488	-0.350624	0.274855	-0.0422976	-0.311032	-0.141817	-0.431242	-0.0179409	-0.064058	0.173618	-0.469778	0.0885956	0.34267	-0.238409	0.262372	-0.0366816	0.160941	-0.131918	0.389994	0.346776	0.276763	-0.29148	0.233146	-0.301874	-0.299558	0.174574	-0.0872734	-0.107238	0.0127837
PC (21:2/21:2)	-0.127238	0.393652	-0.275981	-0.0243258	0.273847	-0.287089	-0.290648	0.172413	0.133988	0.0854454	-0.112839	-0.03583	-0.0319725	0.250067	-0.121166	0.119348	0.296927	0.02344	-0.101623	-0.109309	0.232185	0.276499	-0.0195521	0.0243686	-0.133131	0.149452	0.163322	0.439127	-0.0249618	-0.0471443	-0.0292071	-0.559315	0.0221977	0.141427	0.298547	0.413306	0.0802819	0.130583	0.0381474	-0.330091	0.193185	-0.149508	0.00857008	-0.111555	-0.0595115	-0.28275	-0.0280549	-0.126384	-0.00671578
4-[3-(4-phenoxyphenyl)-1H-pyrazol-5-yl]morpholine	0.105075	-0.0441927	-0.00104186	-0.317544	-0.0108829	0.154054	0.151132	0.201457	0.0113454	-0.201014	-0.133588	0.044591	-0.396821	-0.260105	-0.433178	-0.150259	0.412903	0.0832376	0.17117	-0.142357	0.384817	-0.0279641	0.311675	0.0618488	0.0876643	0.102109	-0.0351559	0.212985	-0.0508958	0.0275171	0.0536371	-0.0141719	0.315026	0.161305	0.181661	0.199572	0.350005	-0.259296	0.281783	0.166099	0.0661266	-0.22182	0.490671	-0.151905	0.222498	-0.288246	0.499917	-0.17752	-0.0414082
5-(3-phenylprop-2-enylidene)-2-thioxohexahydropyrimidine-4,6-dione	-0.222774	0.099827	-0.0340436	0.0744334	-0.0216269	-0.153212	0.422735	-0.0709028	-0.0784476	0.243874	-0.134793	-0.153772	0.463292	-0.380318	0.441506	0.205759	0.179862	-0.0893461	0.196093	-0.110593	0.0772296	-0.0440815	0.109986	-0.283356	-0.0864839	-0.00194287	0.400388	-0.2327	-0.0889444	-0.184998	-0.150433	0.199467	0.107325	0.0459559	0.111114	-0.207624	0.0893619	-0.167079	0.123928	0.187864	-0.141914	0.504129	-0.102033	-0.141596	-0.125615	0.528537	-0.223845	0.0783467	0.285464
PC (16:1e/22:3)	-0.209985	0.344852	-0.150234	-0.239997	0.442296	-0.274469	-0.0438473	0.000944218	0.165902	0.389641	-0.177594	-0.00504991	0.307006	-0.266307	0.238597	-0.0137069	0.271244	-0.0329778	-0.238527	-0.192048	-0.088018	0.365933	-0.224572	0.229362	-0.227704	0.237891	0.0903847	0.231689	0.170773	0.195592	-0.00936585	-0.263347	0.157661	-0.0525035	-0.130926	0.250761	-0.10818	0.0316891	-0.349722	-0.327823	0.372628	-0.126024	-0.278387	-0.180038	-0.066239	0.143361	0.31928	-0.329887	0.0434295
Urocanic acid	0.119466	-0.153218	0.109376	-0.120911	-0.0795237	0.0753267	0.113988	-0.0856976	-0.181999	-0.0200637	0.0644061	0.219845	-0.0212003	0.319505	-0.0935073	-0.219082	0.316108	0.173399	0.213052	0.0721248	-0.0459413	-0.193746	-0.00590542	-0.165444	0.0176692	-0.208574	-0.0774064	0.655093	-0.238771	-0.137773	0.213683	0.0289391	0.0469192	-0.325942	-0.148495	0.609081	-0.150243	-0.227176	-0.0314056	-0.121682	0.123155	-0.191091	0.308291	0.045249	-0.0225274	-0.0248623	-0.192749	-0.0767205	-0.0448563
L-(-)-α-Amino-蔚-Caprolactam	0.190506	-0.484528	0.520609	-0.231355	-0.255584	0.15249	0.382273	-0.255415	0.0821488	-0.274057	-0.0159791	-0.0435237	-0.0353871	-0.256776	-0.0630157	-0.258866	-0.194612	-0.0416827	0.272231	-0.0439972	0.0308827	-0.522794	0.0986446	-0.119762	-0.134989	0.210361	-0.0817124	0.00462751	-0.0768446	0.208215	-0.0420953	0.0139235	0.155346	-0.0675392	0.0278233	0.0392252	0.0719586	-0.126487	0.0910402	0.0879336	0.0521382	-0.0452449	0.08437	-0.00163355	-0.182777	0.0709923	-0.334491	0.0364351	0.0174524
(S)-AL 8810	0.00327716	0.078216	-0.149109	-0.425978	0.234759	0.147287	0.185941	0.105775	0.24165	0.226335	-0.208252	-0.221328	0.133728	-0.20382	0.128791	0.124299	0.254558	-0.23078	0.271956	-0.22054	-0.136894	0.4313	-0.0244179	0.0346881	-0.0950718	0.291087	0.352861	-0.356462	-0.0795594	0.22514	-0.224605	0.189612	0.0101247	-0.119371	-0.152524	-0.365154	0.105999	-0.20407	-0.121084	0.144114	0.128617	0.0916893	0.064777	-0.187964	-0.147903	0.156298	0.531549	-0.264748	0.28654
PE (18:0e/20:5)	-0.153698	0.0667999	0.0108852	0.145696	0.0302359	-0.350603	0.264915	0.147967	0.0193832	-0.0763728	-0.0744283	-0.073841	-0.00923456	-0.0165703	-0.128855	0.241167	0.405187	-0.0603903	0.226252	-0.0771374	-0.00455125	0.0200425	-0.30499	-0.131479	-0.257561	0.0211201	0.181948	0.505465	0.145543	-0.0721407	-0.0742327	-0.116475	-0.0294581	-0.0617504	0.110413	0.489711	-0.161009	-0.0438891	-0.320254	-0.465882	0.20923	-0.113664	-0.489773	-0.0849378	-0.239214	0.347747	-0.135831	-0.158385	-0.171096
Argininosuccinic acid	0.405619	-0.215147	-0.0654482	0.30719	-0.189625	-0.315607	-0.298787	-0.155366	0.0399289	0.276726	0.712966	0.607251	0.172224	0.415294	0.134233	0.0447	-0.19639	0.558271	0.131205	0.718427	-0.223374	-0.136176	-0.439107	-0.704031	0.567445	-0.229579	0.155416	0.159012	-0.455218	0.0167339	0.598598	-0.0610854	-0.559147	-0.187601	-0.197172	0.138877	-0.462114	0.292177	-0.207145	-0.549516	-0.0274071	0.108744	-0.143794	0.705144	0.220278	-0.169434	-0.402167	0.591249	-0.332552
SM (d21:2/17:0)	-0.317853	0.560335	-0.40882	0.134425	0.434911	-0.473192	-0.125072	0.143649	-0.0912187	0.206864	-0.0144851	0.0473186	0.3332	0.0402534	0.270763	0.270424	0.309386	0.139424	-0.133236	0.00782743	0.252964	0.0591468	-0.0928947	-0.0243782	-0.140469	-0.0756765	-0.0747182	-0.00370251	0.183674	-0.262461	0.0605943	0.181074	0.0558594	0.106945	0.45427	-0.0279272	0.194541	0.329619	0.0700992	-0.119182	0.113072	0.167844	-0.292642	-0.0148071	-0.306963	0.386045	-0.271138	-0.108868	0.0995576
(9cis)-Retinal	-0.133313	0.224604	-0.238911	-0.277813	0.204408	0.0723297	0.107767	0.0873424	0.220304	0.122969	-0.0872699	-0.104681	-0.0293292	-8.95409e-05	-0.0594271	0.356781	0.276551	-0.0587332	0.395651	-0.0928263	-0.0541725	0.585237	-0.00195776	0.02246	0.0439676	0.293023	0.665056	-0.419276	-0.0301778	0.192717	-0.103001	0.0573079	-0.0998078	0.037174	0.00150962	-0.428333	0.100202	-0.0281058	-0.0775508	0.108961	0.0312636	0.27228	-0.0864065	-0.0736062	0.0323686	-0.0142935	0.449079	-0.195115	0.290031
PC (18:4e/21:2)	0.141559	-0.127542	0.111035	0.0792904	-0.0899477	0.00363875	-0.185058	-0.0962385	0.0967505	-0.113991	-0.0497772	-0.236911	-0.252931	0.248913	-0.292176	-0.0938322	0.0254764	-0.274797	0.0528482	-0.075616	0.073058	0.0948556	0.0428389	-0.16603	0.0321353	0.129768	0.220102	0.47275	-0.247897	0.249321	-0.243525	-0.529397	0.0840508	-0.184348	-0.0525741	0.465499	-0.193903	-0.0453435	-0.0177738	-0.200605	0.181589	-0.381494	0.0241134	-0.0312126	0.178886	-0.507616	0.201433	0.00134981	-0.195279
PC (17:0/18:3)	-0.139051	0.420554	-0.406775	-0.0595155	0.516798	-0.411606	-0.229228	0.123219	0.0114273	0.665662	0.212694	0.373495	0.682373	-0.143194	0.700468	0.0848935	0.0561416	0.382152	-0.321975	0.226537	-0.0801279	0.147572	-0.354633	-0.0304646	0.0740365	-0.180543	-0.205935	-0.221491	0.1802	-0.132141	0.375991	0.181408	-0.195837	0.224332	-0.0278047	-0.220102	-0.0208547	0.196669	-0.208517	-0.361566	0.210818	0.312004	-0.203623	0.201501	-0.193494	0.370244	-0.162246	-0.00190713	0.0913283
N-acetyl-L-ornithine	-0.313021	0.170388	0.039004	-0.246212	0.261632	0.276017	-0.224238	-0.0246911	0.22747	0.477296	-0.326926	-0.29268	0.445961	-0.0528055	0.478924	-0.191006	0.0486936	-0.288681	-0.384405	-0.330844	0.139449	0.0836745	0.180698	0.330655	-0.237851	-0.331854	-0.369275	-0.228211	0.15838	0.353339	-0.286278	-0.167068	0.202635	0.0501797	0.097438	-0.240603	0.105936	-0.27413	0.176232	0.0537957	0.61292	-0.105958	0.270577	-0.310108	-0.120103	0.0410888	0.171236	-0.34347	0.304085
SM (d14:0/27:1)	-0.0218447	0.334824	-0.347515	-0.106283	0.419317	-0.3234	-0.325998	0.163173	0.268477	0.40015	-0.0429967	0.0397837	0.190718	0.23994	0.090798	0.160297	0.378348	0.0482134	-0.0625773	-0.0348619	0.0297485	0.369275	-0.193194	-0.0662152	-0.0556901	0.0263701	0.240893	0.391746	-0.0522221	0.141895	0.0391498	-0.411273	-0.0934111	0.0214072	0.023381	0.347488	-0.0785412	-0.0262711	-0.118602	-0.417209	0.416881	-0.0950066	-0.00993742	-0.0421345	-0.0480282	-0.216582	0.0588388	-0.154103	-0.0150079
4-methyl-6-phenyl-5,6-dihydro-2H-pyran-2-one	-0.472748	0.368704	0.0320634	0.101229	-0.172863	0.212601	-0.0995294	-0.125368	-0.256145	-0.244813	-0.157945	-0.152305	-0.253854	0.097778	-0.226164	-0.104519	0.0184719	-0.0621938	-0.191405	-0.17583	0.465759	0.205377	0.433762	0.311714	0.0139719	-0.000986063	-0.044534	-0.0402838	0.0491548	-0.138518	-0.138311	-0.422021	0.327061	0.150203	0.486263	-0.00873553	0.167962	0.265219	0.318165	0.172646	-0.109994	-0.106057	0.0945004	-0.153567	0.302438	-0.237142	0.304113	-0.125335	0.147168
Methyl palmitate	0.313021	-0.791902	0.60186	0.438275	-0.755007	0.54246	-0.0507013	-0.343299	-0.0797477	-0.475681	0.340835	0.0291135	-0.577245	0.366787	-0.490463	-0.428375	-0.451714	-0.0839591	0.0683449	0.318377	-0.217129	-0.406475	-0.0749762	-0.0413696	0.353142	-0.272729	-0.312637	0.0274397	-0.202612	0.31618	0.0183104	0.00344252	-0.243295	-0.327858	-0.275544	0.0218592	-0.344756	-0.0378617	-0.125047	-0.128848	-0.0551298	-0.41623	0.000385756	0.341931	0.434199	-0.399626	0.0733786	0.40429	-0.344891
Genistein	-0.11145	0.175855	-0.0596035	-0.067537	0.0255754	-0.126027	-0.00358214	0.503422	0.0132423	-0.212728	-0.279341	-0.195394	-0.133068	-0.247439	-0.178939	0.414848	-0.0387966	-0.181349	-0.178868	-0.271242	0.127911	-0.0940863	0.140677	-0.224402	-0.304502	-0.0414631	-0.153496	0.176224	0.00458919	-0.24996	-0.19039	0.217903	0.205199	-0.130156	0.219029	0.189441	0.0809826	0.066605	0.0956493	0.299603	-0.264386	-0.281548	-0.119768	-0.292558	-0.309545	0.370231	0.15712	-0.209173	-0.201139
4'-methyl Acetyl fentanyl-d5	0.239527	-0.00726248	-0.221133	0.178514	-0.10419	-0.0491862	-0.346643	-0.00268507	-0.0769233	0.257963	0.601419	0.697459	0.0922524	0.0764373	0.135255	-0.143224	-0.126869	0.713692	-0.179409	0.631774	0.0986418	-0.200825	-0.073081	-0.378013	0.658467	-0.257152	-0.245594	-0.326325	-0.388194	-0.161004	0.704486	0.351455	-0.324921	0.0399064	0.115356	-0.341456	0.102495	0.339795	0.181753	-0.0803349	-0.2688	0.179094	0.292944	0.568966	0.358762	-0.103377	-0.0439391	0.582678	-0.0786426
PC (18:3e/4:0)	0.196368	-0.564231	0.549527	-0.0101502	-0.640734	0.500134	0.346982	-0.221446	-0.187058	-0.493223	-0.142889	-0.250472	-0.364936	0.0208795	-0.328393	-0.277262	-0.237506	-0.28975	0.245969	-0.158817	0.0340594	-0.412272	0.416325	-0.0666136	-0.0260661	-0.12065	-0.0929242	0.187814	-0.198812	-0.0126373	-0.256069	-0.0570889	0.237539	-0.210162	-0.130092	0.204025	-0.0876641	-0.362624	0.289724	0.44955	-0.214545	-0.188991	0.420906	-0.134582	0.1462	-0.176786	-0.0708498	0.0519862	-0.0734115
4-(4-nitrophenylazo)aniline	0.218954	-0.485464	0.354802	-0.0701106	-0.364607	0.482451	0.219777	-0.265944	-0.229234	-0.207048	0.111444	0.0406497	-0.10672	0.0348616	-0.0179422	-0.343563	-0.235433	-0.00278924	0.210287	0.104992	-0.0399073	-0.409143	0.267163	-0.0708598	0.210206	-0.218289	-0.221466	-0.206499	-0.177482	0.00959616	0.0369564	0.385969	0.0799728	-0.159012	-0.19449	-0.204914	0.0233854	-0.239645	0.237152	0.418667	-0.155034	0.0457653	0.432279	0.114909	0.131749	-0.0705875	-0.0793782	0.131994	0.0740082
PC (17:2/16:3)	0.370216	-0.0998034	-0.16769	0.258803	0.0878107	-0.228152	-0.298996	-0.00111422	0.0743917	0.0301085	0.0485009	-0.0806462	-0.072695	0.116675	-0.117473	-0.0265489	0.125264	-0.0860507	-0.109917	0.0750393	0.243909	-0.336933	0.159605	-0.222301	0.161087	-0.258307	-0.217757	0.217808	-0.122494	0.128304	-0.0782122	0.178469	0.150845	-0.131693	0.113134	0.157606	0.0899927	-0.0636021	0.412006	0.229372	0.199629	-0.200325	0.282631	0.0589336	0.131695	-0.293194	-0.131301	0.182258	-0.284913
D,L-Camphor	-0.0289977	-0.320662	0.281694	0.00416597	-0.307746	0.318362	0.288451	0.11704	0.201646	-0.158379	-0.396248	-0.594953	-0.151883	-0.125789	-0.124564	0.278187	-0.0835665	-0.59082	0.267099	-0.402828	-0.00185115	0.0196528	0.285118	0.0810652	-0.227841	-0.259143	0.257547	-0.164026	0.252193	0.257143	-0.597493	-0.186783	0.0954209	0.210447	-0.126891	-0.160861	-0.0878647	-0.636831	0.203717	0.354501	0.176683	0.088589	0.0977699	-0.376233	0.0229697	-0.0813675	0.0667671	-0.213508	-0.00811405
PC (22:6e/19:0)	-0.122761	0.164342	-0.0785851	0.223259	0.0788481	-0.134079	-0.271939	-0.03712	0.033969	-0.183876	0.108793	0.000474592	-0.159704	0.507882	-0.196592	0.00531124	-0.00863707	0.0371731	-0.0130561	0.109604	-0.00723019	0.1172	-0.234655	-0.0268174	-0.0807001	0.329459	0.155247	0.21623	-0.163934	-0.0683899	0.00382681	-0.341999	-0.25543	-0.0705462	0.282366	0.19821	0.0423078	0.438845	-0.198587	-0.46573	-0.0926204	-0.127953	-0.311431	0.114786	-0.180317	-0.180027	-0.275717	0.145566	0.0711186
ACar 19:1	0.208541	-0.282137	0.218474	0.111532	-0.0231995	-0.0623631	-0.507613	-0.142549	0.367891	0.0996881	0.602528	0.723416	-0.071923	0.168244	-0.117542	-0.140833	-0.41726	0.672212	-0.34188	0.606926	-0.233544	-0.375046	-0.45969	-0.0960095	0.339233	-0.108119	-0.39095	-0.134818	-0.0676867	0.482817	0.725285	0.104588	-0.446974	-0.143501	-0.0440008	-0.135004	-0.171119	0.484143	-0.28746	-0.495007	0.196666	-0.228593	-0.292029	0.57416	0.18847	-0.164925	-0.252696	0.396443	-0.308365
L-(-)-Methionine	0.24403	-0.301833	0.00816775	0.0178017	-0.264236	0.103837	0.156511	0.432754	0.109836	-0.0913901	0.0360834	0.00854235	-0.167231	0.235677	-0.178649	0.25577	0.0803343	-0.0558441	0.31862	0.0516712	-0.382211	0.0640207	-0.326034	-0.31749	-0.0666634	-0.151483	0.118466	0.260983	-0.170885	-0.196661	-0.00277287	0.104278	-0.466946	-0.135993	-0.296637	0.21574	-0.238475	-0.331976	-0.332251	-0.273049	-0.16588	-0.0893785	-0.00455698	0.0179565	-0.245789	0.193219	-0.0389059	0.0648903	-0.164084
PC (18:2/20:5)	0.340161	0.0473481	-0.329194	0.122907	0.271712	-0.274889	-0.638656	0.163531	0.269151	0.434714	0.390452	0.362658	0.161467	0.0025654	0.154014	0.0906579	-0.101964	0.340531	-0.365396	0.410407	0.119123	-0.151851	-0.119733	-0.379164	0.464211	-0.348514	-0.322047	-0.231794	-0.181743	0.280527	0.367319	0.327788	-0.164911	-0.0454423	0.0515989	-0.26933	0.016033	0.233076	0.190707	-0.0347389	0.235877	-0.124316	0.120792	0.385245	0.223504	-0.211658	0.149353	0.303636	-0.317482
β-Alanine	0.0748285	0.0389734	0.0769093	-0.0190226	0.174967	-0.249488	-0.348442	0.0362853	0.396787	0.0785008	-0.257669	-0.373525	0.0668473	-0.151253	-0.0280534	0.0780089	-0.0639663	-0.339246	-0.31799	-0.271682	0.417444	-0.276345	0.25322	-0.109869	-0.223252	-0.100253	-0.23892	0.200645	0.0586085	0.469659	-0.363496	-0.373575	0.383443	-0.00548155	0.364701	0.196742	0.0725875	-0.00399263	0.420063	0.123423	0.545893	-0.403131	0.0610209	-0.223543	-0.0795188	-0.255822	-0.0605466	-0.143691	-0.25566
PC (16:2e/22:3)	-0.117235	0.422742	-0.510683	-0.0765633	0.470479	-0.449775	-0.0785887	0.335646	0.112159	0.581362	0.118583	0.247859	0.556937	0.0530079	0.541505	0.491448	0.172465	0.263788	0.0375346	0.140605	-0.279577	0.443489	-0.456973	-0.0795157	-0.0385943	-0.160936	0.256799	-0.143786	0.271895	-0.214544	0.2447	0.0622709	-0.42365	0.32188	-0.178671	-0.164134	-0.168059	-0.0165836	-0.347427	-0.394201	0.139	0.495074	-0.318376	0.110221	-0.297538	0.369587	-0.241989	-0.107813	0.0842821
PC (19:1/19:2)	-0.49609	0.417249	-0.129686	-0.313649	0.380587	-0.0673062	0.0879061	0.0411431	0.139219	0.370016	-0.0814051	0.176159	0.369196	-0.0120334	0.286027	0.0898871	0.436412	0.241327	0.0639451	-0.0770801	0.0122699	0.348628	-0.201253	0.134674	-0.197654	0.15598	0.268049	-0.0181271	0.0586706	0.0445047	0.184456	-0.126227	-0.0684366	0.0690489	0.203773	-0.020553	0.1275	0.0631321	-0.27089	-0.416796	0.291232	0.1945	-0.207543	-0.101554	-0.228428	0.334384	0.0257225	-0.288843	0.422719
Dl-5-Hydroxylysine	-0.0353318	-0.200383	0.314356	-0.539282	-0.125807	0.585218	0.108496	0.111892	-0.00652726	-0.202578	-0.332969	-0.107998	-0.220771	-0.0292191	-0.156216	-0.109378	-0.24028	-0.126457	0.0325426	-0.345539	-0.0260244	-0.00875324	0.459322	0.28573	-0.179791	-0.0577836	-0.0147516	0.0669179	0.0880333	0.0103265	-0.110593	-0.251965	0.218313	0.224546	-0.248141	0.0955114	0.0934859	-0.504572	0.226382	0.45862	-0.0998797	-0.0241967	0.614522	-0.343898	0.0432481	-0.358103	0.0940586	-0.350397	0.184343
Apocynin	-0.0892709	0.110946	-0.0837193	0.0510891	-0.163677	0.242719	-0.0339903	-0.190672	-0.213561	-0.0179812	-0.019427	0.0129733	-0.0883733	0.322406	-0.0756036	-0.216875	0.198928	0.0667776	0.118327	0.00391727	0.214673	0.145419	0.359892	-0.0746512	0.204889	0.0881435	0.351688	0.140626	-0.453055	-0.242326	0.0160664	-0.288085	0.0637593	-0.0205402	0.153228	0.124256	0.185748	-0.0550817	0.324627	0.152346	-0.287557	0.162072	0.522506	-0.03181	0.302095	-0.384987	0.000491464	0.193571	0.332345
2'-O-Methylguanosine	0.38951	-0.587984	0.292989	0.256356	-0.390741	0.210655	-0.0240815	-0.0181738	0.177926	-0.155124	0.0322531	-0.121414	-0.345934	0.0157976	-0.364646	-0.082091	-0.0647542	-0.223976	0.0266345	0.0463688	-0.16167	-0.313323	0.0107338	-0.248212	0.15421	-0.238202	-0.0462213	0.24501	-0.249052	0.337504	-0.13281	0.139463	-0.0383574	-0.380363	-0.316936	0.21496	-0.224046	-0.341982	0.0103636	0.110707	0.0547025	-0.375612	0.131494	0.0189741	0.301914	-0.218958	0.192228	0.230924	-0.364233
PC (16:2e/20:2)	-0.287907	0.301092	-0.183057	-0.0448571	0.123367	-0.0804908	-0.0139859	-0.0699109	-0.312985	0.378264	0.409273	0.558713	0.349831	0.132736	0.358903	0.0938766	0.154434	0.571308	0.113809	0.405266	-0.0014833	0.209798	-0.164228	-0.275173	0.397849	-0.311928	0.149395	-0.105593	-0.109321	-0.221861	0.560256	0.230169	-0.163689	-0.00432772	-0.0281435	-0.0957121	-0.190152	0.219921	-0.184689	-0.26371	-0.00595962	0.324849	-0.147316	0.382059	0.169875	0.244422	0.0752406	0.0135515	0.117811
PC (18:2e/16:0)	0.000369887	0.12662	-0.187748	-0.148817	0.600542	-0.17848	0.221964	-0.217852	-0.131423	-0.224122	-0.157879	-0.135064	-0.102393	-0.14005	-0.111505	-0.115805	0.288847	-0.116454	0.225922	-0.149533	-0.0690623	0.0506991	-0.0219903	0.353811	-0.190483	0.753775	0.343618	-0.0625193	0.182073	0.0111234	-0.136677	0.452262	0.261192	-0.018978	-0.0653198	-0.0664613	0.451011	0.125478	-0.124084	0.230868	-0.140967	0.202517	-0.20464	-0.15157	-0.216133	-0.0165533	-0.0467202	-0.181205	0.328245
Thromoboxane B1	-0.58336	0.644908	-0.316865	-0.0703111	0.202865	0.0476353	0.172466	0.00990649	-0.198756	-0.0862323	-0.38231	-0.233971	-0.0977162	-0.0723594	-0.0976925	0.136383	0.449074	-0.0949559	0.0372352	-0.371387	0.373206	0.545936	0.381046	0.614108	-0.182188	0.21085	0.319932	-0.223957	0.351997	-0.260005	-0.21898	-0.20435	0.326253	0.394018	0.423645	-0.217259	0.405149	0.0475236	0.257045	0.305459	-0.0951496	0.31984	0.0658911	-0.382565	0.132161	-0.00581791	0.296272	-0.35494	0.4443
(-)-Camphor	0.113148	-0.126589	0.0711753	0.473325	-0.3331	0.075261	-0.151264	-0.373994	-0.49744	-0.337039	0.448092	0.280171	-0.194289	0.315771	-0.0956436	-0.303361	-0.373448	0.301581	-0.0656698	0.45376	0.180161	-0.42918	0.170818	-0.119477	0.453883	-0.169189	-0.324589	-0.200805	-0.183027	-0.314092	0.285223	0.290725	-0.034293	-0.0430952	0.20526	-0.193935	0.065499	0.465605	0.304295	0.209505	-0.453399	0.108182	0.0957416	0.450246	0.284649	-0.193275	-0.367794	0.50053	-0.0795824
PC (18:3e/19:2)	-0.172717	-0.268368	0.362065	0.211244	-0.236872	0.270027	0.192671	-0.152755	-0.0528625	-0.135845	-0.235126	-0.520455	-0.0859699	-0.2092	-0.0152541	-0.202698	-0.068705	-0.543149	-0.0145175	-0.263656	0.120426	-0.0979535	0.146011	0.083262	-0.106006	-0.0621044	-0.0170234	-0.0311298	0.0805327	0.250773	-0.522403	-0.192136	0.23289	0.0250692	-0.00935015	0.000324388	-0.0374598	-0.281385	-0.000420936	-0.0204841	0.19003	-0.171927	-0.133283	-0.221266	0.114388	-0.0521205	0.275681	-0.0698432	0.00785227
SM (d27:0/15:1)	0.232892	0.105235	-0.284753	0.182967	0.0819315	-0.289295	-0.366007	-0.0557957	0.260415	0.277561	0.243407	0.0268504	0.0346194	0.41864	-0.0343644	0.122594	0.174956	0.00623083	0.100561	0.23332	-0.0502421	0.360145	-0.301777	-0.243614	0.243838	-0.00748509	0.256348	0.136246	-0.219637	0.276798	0.0218629	-0.341473	-0.295187	-0.182653	-0.0201529	0.0856241	-0.301025	0.18584	-0.138758	-0.443575	0.353594	-0.14258	-0.147297	0.274975	0.153831	-0.321016	0.147967	0.156724	-0.209267
PC (15:0/16:1)	0.167482	0.000815088	-0.0723651	-0.0978957	-0.00474321	-0.162857	0.0494633	0.125409	0.126845	0.00661956	-0.166892	-0.0996692	-0.0739288	0.118631	-0.211118	0.116048	0.472695	-0.0632428	0.237374	-0.15452	0.297935	-0.110555	0.213261	-0.199923	-0.083832	-0.218134	0.0797524	0.551487	-0.0895518	0.0364593	-0.0951061	-0.200966	0.209926	-0.054939	0.18297	0.49212	0.0217985	-0.334381	0.347225	0.0809072	0.342157	-0.168899	0.378676	-0.162636	-0.00238355	-0.166625	-0.112253	-0.153389	-0.157164
2,3-Dinor-TXB2	0.0622406	-0.0427956	-0.0229444	-0.321481	0.0786388	0.171485	0.306829	-0.0450269	-0.228593	-0.117948	0.0601675	0.139719	-0.137411	-0.126382	-0.115174	-0.350571	0.409773	0.176132	0.381681	0.0396032	0.259409	-0.0174276	0.131441	0.0120262	0.17309	0.24178	0.0163302	0.0104286	-0.140032	-0.122164	0.146118	0.20549	0.176471	0.107923	0.124261	0.000526024	0.36658	-0.112671	0.0985059	-0.0118533	-0.00809936	0.0382129	0.368226	0.055428	0.0388681	-0.0922559	0.297168	-0.0908419	0.221682
PC (16:2e/21:2)	-0.432106	0.537219	-0.331021	-0.129858	0.686395	-0.267456	-0.0529191	-0.03405	-0.116322	0.279168	-0.0556648	0.118041	0.405292	-0.0518655	0.410202	-0.0685	0.27319	0.193175	-0.148993	-0.0413307	0.0708951	0.215905	-0.166876	0.266635	-0.184814	0.397462	0.134952	-0.101574	0.170735	-0.190783	0.126651	0.0597933	0.0386515	0.263054	0.22504	-0.0915931	0.39054	0.278638	-0.191002	-0.291296	0.0283224	0.336403	-0.253633	-0.0701813	-0.316562	0.209822	-0.20258	-0.159719	0.486271
Trigonelline	0.00458845	-0.229315	0.215423	0.386211	-0.245066	0.279339	-0.189407	-0.299639	-0.426655	-0.266592	0.24455	0.156788	-0.113382	0.366397	0.00792348	-0.434627	-0.43679	0.118262	-0.261637	0.262999	-0.0776669	-0.440707	0.0777425	-0.00238546	0.18984	-0.118786	-0.37367	0.0193511	-0.228783	-0.282117	0.153884	0.206403	-0.0824974	-0.162749	-0.035712	0.0269768	0.0404126	0.243408	0.0611397	0.0763495	-0.44819	-0.0313396	0.110624	0.226084	0.0946204	-0.142597	-0.4148	0.392871	0.0684692
PC (16:1/17:2)	0.305364	-0.0839151	-0.298981	0.261427	0.177979	-0.316274	0.171083	-0.0875664	-0.20314	0.0685491	0.300458	0.223215	0.0502454	-0.0524411	0.0275987	-0.0432037	0.429853	0.21296	0.303146	0.332758	-0.0110354	-0.192499	-0.195691	-0.28807	0.325782	0.0170881	0.0938289	-0.013162	-0.14615	-0.143476	0.220908	0.759483	-0.0605858	-0.184679	-0.067921	-0.0675411	0.143884	0.0316635	-0.0198101	0.0167153	-0.0850322	0.203845	-0.052619	0.288058	0.0570105	0.199871	-0.0587724	0.279532	-0.061169
ACar 20:4	0.409415	-0.480242	0.246241	0.10918	-0.366096	0.21914	-0.362603	-0.0325296	0.350957	-0.117313	0.460364	0.5389	-0.45552	0.15446	-0.500192	-0.0836479	-0.28006	0.463767	-0.13366	0.474193	-0.194941	-0.295751	-0.16412	-0.179722	0.457128	-0.197891	-0.231304	-0.0720466	-0.278018	0.460385	0.53648	0.195978	-0.337413	-0.32021	-0.162649	-0.0950672	-0.181318	0.168701	-0.0583422	-0.0680413	-0.00427453	-0.366193	0.0950376	0.42868	0.475097	-0.344293	0.17929	0.411837	-0.409599
17α-Ethinylestradiol	0.305764	-0.241461	0.120591	-0.0529272	-0.284947	0.195389	0.0735808	-0.0805295	-0.179416	-0.238722	-0.0420824	-0.0556229	-0.207939	-0.0876546	-0.169327	-0.104776	-0.197405	-0.0693126	0.0524483	-0.0397526	0.153821	-0.302014	0.467451	-0.101529	0.157511	-0.172987	-0.150431	-0.00559902	-0.130122	-0.105214	-0.0569377	0.175748	0.284438	-0.0605413	-0.0795258	-0.000626017	0.0483431	-0.187181	0.487653	0.665254	-0.251695	-0.0282301	0.533029	-0.03377	0.227393	-0.234312	0.00619282	0.0822279	-0.135331
PC (9:0/9:0)	0.129517	-0.141456	-0.0997737	0.687803	-0.308981	-0.0439685	-0.191802	-0.0378984	-0.190478	-0.0401945	0.256516	-0.06629	-0.0325411	0.374571	0.0408057	0.0905791	-0.212869	-0.101459	-0.0745025	0.285112	-0.13508	-0.119772	-0.141934	-0.251128	0.25774	-0.397452	-0.105098	-0.113086	-0.132459	-0.198405	-0.0721644	0.228344	-0.328706	-0.15304	-0.0568393	-0.147572	-0.233371	0.120121	0.00387617	-0.0337099	-0.239345	0.0614836	-0.174084	0.260087	0.125575	0.0421235	-0.23005	0.447265	-0.202824
(3beta,9xi)-3-(beta-D-Glucopyranosyloxy)-14-hydroxycard-20(22)-enolide	0.301752	-0.6164	0.417973	0.543487	-0.585335	0.101151	0.0559747	-0.223053	-0.26697	-0.313817	0.294394	0.00344907	-0.255461	0.182387	-0.206728	-0.150726	-0.398004	-0.111309	0.0693714	0.290065	-0.236591	-0.457372	-0.101808	-0.505336	0.274557	-0.236953	-0.0104729	0.368406	-0.34878	-0.0452657	-0.0133243	0.0742524	-0.137874	-0.385169	-0.363239	0.384965	-0.459511	-0.0458787	-0.160064	-0.0950101	-0.314063	-0.220028	-0.18343	0.281557	0.258958	-0.112087	-0.190476	0.455116	-0.419394
PC (18:4e/2:0)	0.668834	-0.609001	0.15645	0.422227	-0.650675	0.00508753	-0.0960417	0.00780395	-0.0322403	-0.198946	0.475425	0.170207	-0.274036	0.474631	-0.244374	0.0695221	-0.426571	0.0403069	0.239117	0.470011	-0.441261	-0.204586	-0.337455	-0.571749	0.377751	-0.348247	-0.0596094	0.249398	-0.357354	-0.0794634	0.149865	0.0159572	-0.553323	-0.355	-0.477981	0.218173	-0.652816	-0.023753	-0.214311	-0.216637	-0.253551	-0.196353	-0.0387135	0.4881	0.15596	-0.176696	-0.229169	0.519728	-0.593925
PC (20:3/20:4)	0.337047	-0.528844	0.436428	0.192407	-0.485819	0.318944	-0.11138	-0.228738	-0.0749859	-0.32587	0.0862297	-0.23028	-0.358524	0.0929425	-0.285775	-0.412697	-0.418125	-0.335486	-0.0987574	0.0428811	-0.0116015	-0.305218	0.102898	-0.157434	0.164519	-0.069616	-0.348172	0.187031	-0.281763	0.246958	-0.24039	-0.174146	0.106078	-0.350919	-0.184519	0.205557	-0.26741	-0.0125068	0.032556	0.0275081	-0.00416307	-0.564147	0.118535	0.112704	0.243304	-0.378266	0.276662	0.193081	-0.355831
D-Sphingosine	-0.226656	0.271254	-0.0406014	0.0888241	0.0548409	-0.220654	-0.0503696	-0.0504969	0.264575	-0.0536511	-0.321691	-0.33279	-0.0755901	0.0724781	-0.219868	0.135116	0.365597	-0.228907	-0.0064464	-0.314873	0.388107	0.104323	0.196175	0.15541	-0.297141	0.135067	0.230568	0.301444	0.0848063	0.195176	-0.320159	-0.596856	0.246032	0.0772101	0.506826	0.279779	0.144399	0.0182349	0.273161	-0.0669799	0.354673	-0.12806	-0.0377962	-0.304645	-0.00370927	-0.172141	-0.119927	-0.151506	0.042967
SM (d18:3/26:2)	0.0021151	-0.165931	0.181716	0.200118	-0.285844	0.241157	-0.0136009	-0.300833	-0.239602	-0.447178	0.257133	0.138487	-0.461813	0.4859	-0.440208	-0.322677	-0.0468582	0.140224	0.239402	0.244467	-0.026065	0.0122585	-0.0525665	-0.0485009	0.221913	0.390027	0.246032	0.19604	-0.389878	-0.106193	0.136568	-0.2083	-0.174937	-0.191168	0.0851628	0.197039	0.0315653	0.328695	-0.156534	-0.277083	-0.3651	-0.119707	-0.0470053	0.250556	0.19252	-0.385272	-0.0306631	0.292473	0.106795
ACar 20:5	0.364456	-0.469461	0.306962	-0.17292	-0.337568	0.321337	-0.318725	0.373471	0.645537	-0.123409	0.00620211	0.072988	-0.400662	-0.0876828	-0.413971	0.160852	-0.478995	0.0077774	-0.260369	0.0039632	-0.203061	-0.188391	-0.0500322	0.0464853	-0.0110012	-0.259611	-0.406418	-0.199075	0.0790047	0.527978	0.0723187	-0.0974376	-0.271381	0.00592908	-0.1597	-0.205582	-0.144227	-0.182164	0.0221638	0.0829926	0.164171	-0.448623	0.179529	-0.000610186	0.104656	-0.251815	0.225213	0.0506448	-0.421906
2-cyano-3-(3,4-dimethoxyphenyl)acrylic acid	0.490776	-0.187479	-0.215123	0.560509	-0.165777	-0.263603	-0.233513	-0.203606	-0.140661	-0.126285	0.620904	0.269175	-0.126449	0.197786	-0.0460854	-0.0212436	-0.415985	0.209998	0.00472706	0.626639	-0.302894	-0.0967289	-0.407243	-0.338744	0.516831	0.190835	-0.0565528	-0.446416	-0.283235	-0.109547	0.260088	0.540003	-0.462299	-0.294061	-0.154341	-0.453111	-0.167555	0.648833	-0.209411	-0.0764982	-0.50722	0.0849219	-0.395551	0.641463	0.142069	0.0103198	-0.0811458	0.697426	-0.292256
11-Deoxy prostaglandin F1β	0.0848144	-0.226233	0.274569	-0.153805	-0.342084	0.411318	0.241557	-0.164514	-0.256154	-0.380445	-0.229502	-0.201501	-0.28365	-0.121845	-0.239637	-0.238598	-0.0948795	-0.174469	0.122369	-0.232847	0.314833	-0.318609	0.681112	0.0808553	0.0229632	-0.0886371	-0.106844	0.0090075	-0.0971839	-0.117711	-0.197167	0.0476902	0.472259	0.0186706	0.0828194	0.0253547	0.228342	-0.29443	0.604925	0.757513	-0.241671	-0.0162829	0.657447	-0.223746	0.219788	-0.262606	0.0313336	-0.059038	0.0848172
4,4'-dimethoxy[1,1'-biphenyl]-2-carbonitrile	0.361296	-0.0716985	-0.129932	0.461993	-0.126823	-0.313951	-0.599836	-0.330842	0.0332764	0.285687	0.791221	0.626404	0.207274	0.490471	0.210405	-0.179373	-0.402776	0.587191	-0.249232	0.797323	-0.151321	-0.194669	-0.439661	-0.449508	0.600535	-0.174458	-0.24869	-0.123554	-0.418593	0.0753427	0.623564	-0.0042023	-0.541925	-0.261463	0.00988004	-0.142543	-0.340191	0.69443	-0.121708	-0.509146	-0.0298416	-0.012401	-0.190457	0.800097	0.238569	-0.198958	-0.411302	0.721948	-0.293359
2,3-dihydroxypropyl 12-methyltridecanoate	0.161161	-0.0303145	-0.209906	0.231746	-0.13596	-0.194704	0.0898445	0.30801	0.14258	0.143466	-0.175113	-0.386415	0.0104462	0.0114987	0.0187859	0.461059	0.133392	-0.393641	0.20697	-0.172232	-0.0449882	0.31093	-0.0330957	-0.0196355	-0.0411591	-0.439048	0.242317	0.0638056	0.362673	0.0032349	-0.393636	-0.313881	-0.141111	0.372531	-0.221371	0.031318	-0.323436	-0.53411	0.0596992	-0.0162111	0.271237	0.171319	-0.0201548	-0.151134	0.0940728	-0.101023	0.048004	-0.106009	-0.301728
Creatine	0.32502	-0.267597	0.132541	-0.131881	0.159037	-0.241159	-0.315862	0.292734	0.68234	0.182436	0.00265581	-0.0018786	0.0459953	-0.411497	-0.0104583	0.142476	-0.292772	-0.0193744	-0.309971	-0.00535632	0.0157086	-0.300573	-0.188948	-0.191426	-0.0943495	0.0393601	-0.221601	-0.0627922	0.104374	0.581481	0.00183741	-0.202976	-0.0941836	0.211556	0.0191551	-0.0473392	0.0303855	-0.0725311	-0.00506216	-0.235564	0.40734	-0.272058	-0.10893	0.00484268	-0.115702	-0.164557	-0.0397523	0.0797038	-0.362324
PC (22:6e/19:2)	-0.515685	0.395469	-0.147585	0.236326	0.0277749	-0.102141	-0.0143695	0.0330657	0.000892748	0.204097	-0.0601813	-0.0175952	0.186352	0.195339	0.154466	0.222825	0.247335	0.0469813	-0.0696794	-0.0460815	0.0306503	0.37244	-0.162282	0.246186	-0.126503	-0.204704	0.164191	-0.0244772	0.265891	-0.0958374	-0.0112312	-0.329172	-0.173897	0.205138	0.226032	-0.0341971	-0.106231	0.0735577	-0.173266	-0.382026	0.19277	0.205299	-0.350434	-0.0708706	0.00736315	0.221054	-0.090345	-0.108152	0.164985
(2E)-N-(4-acetamidobutyl)-3-(4-hydroxy-3-methoxyphenyl)prop-2-enamide	0.169934	-0.440625	0.420015	0.46215	-0.489537	0.0368032	-0.0410791	-0.194579	-0.308442	-0.282623	0.227434	0.0547639	-0.155695	0.0373462	-0.115734	-0.225933	-0.481908	-0.0525602	-0.224049	0.221055	-0.148481	-0.52419	-0.0485631	-0.470352	0.159169	-0.154474	-0.229658	0.439444	-0.377037	-0.137736	0.0417449	0.0425132	0.0183116	-0.447288	-0.227309	0.481583	-0.386008	0.153493	-0.140243	-0.070591	-0.388794	-0.355149	-0.205249	0.207345	0.16562	0.0186327	-0.16942	0.400821	-0.402891
Prostaglandin B1	-0.33871	0.148999	0.0814861	0.333714	-0.268307	0.191093	0.14258	-0.26587	-0.417401	-0.367726	-0.20595	-0.296992	-0.34217	0.237353	-0.35163	-0.233336	0.343505	-0.251149	0.0532355	-0.20393	0.361661	0.0525876	0.376375	0.213875	-0.0241738	-0.0171159	0.0774917	0.360906	-0.0905364	-0.215521	-0.291835	-0.219106	0.377117	-0.166884	0.321386	0.349156	0.0987989	0.0279659	0.238469	0.157606	-0.111259	-0.182188	0.0991361	-0.208387	0.295079	-0.160367	0.189153	-0.0601094	0.112955
PC (18:1/20:5)	-0.165361	0.335002	-0.325204	-0.212291	0.470728	-0.283646	-0.232185	0.435067	0.226091	0.532535	0.0838097	0.276961	0.508815	-0.0718927	0.515541	0.352156	-0.0346873	0.296766	-0.209709	0.0972104	-0.160361	0.220137	-0.371488	-0.0770812	-0.0949033	-0.163514	-0.0481741	-0.193963	0.230714	-0.0910449	0.280247	0.0152575	-0.355771	0.380653	-0.0336022	-0.193295	-0.00916954	0.0256999	-0.269082	-0.410449	0.174878	0.282392	-0.21118	0.0653991	-0.362388	0.305202	-0.19483	-0.122179	0.0853454
PC (18:2/18:3)	0.163808	-0.557282	0.484082	0.0649745	-0.245358	0.422179	-0.0210805	-0.108584	0.0738723	-0.389822	-0.0790159	-0.206526	-0.387589	-0.0850535	-0.334362	-0.251701	-0.303929	-0.241764	-0.0767161	-0.0867112	0.120193	-0.587496	0.292507	0.128186	0.0062568	-0.230647	-0.4213	-0.108713	0.117249	0.396379	-0.203652	0.233566	0.223099	-0.026919	-0.00844958	-0.108959	0.147147	-0.253454	0.289427	0.372885	0.147321	-0.308601	0.216362	-0.0779237	0.137203	-0.284339	-0.0024089	0.00952787	-0.15866
Xanthurenic Acid	-0.395213	0.142136	0.165534	-0.257767	0.0230313	-0.0630634	0.293783	0.301513	0.288992	0.0771176	-0.558185	-0.373146	0.122966	-0.336802	0.0258067	0.417103	0.255039	-0.269342	0.0977006	-0.560136	0.32861	0.0645161	0.318748	0.19509	-0.498581	-0.272432	0.264078	0.260569	0.523662	0.129368	-0.361855	-0.674252	0.3041	0.615673	0.236547	0.281515	0.0473226	-0.631513	0.270271	0.0428642	0.483428	0.170274	0.0749599	-0.56501	-0.119348	0.030624	-0.201456	-0.517791	0.0491197
SM (d21:0/12:1)	0.0568981	0.232014	-0.270999	-0.0330333	0.136062	-0.310476	-0.0780962	0.289089	0.414363	0.19643	-0.360921	-0.298345	0.0650772	-0.241927	-0.0638811	0.412702	0.374648	-0.202267	-0.0478581	-0.32923	0.416523	0.0309811	0.332236	0.00121947	-0.183285	-0.236475	0.0939485	0.04982	0.198134	0.184239	-0.285195	-0.212709	0.265437	0.255572	0.361674	0.00654779	0.198362	-0.316495	0.5652	0.351826	0.391818	0.0322567	0.298086	-0.34839	0.0375464	-0.0823913	-0.0115283	-0.162691	-0.12608
PC (21:2/20:5)	0.013461	-0.533433	0.430702	0.177804	-0.405439	0.317417	0.463544	-0.118215	-0.166931	-0.226023	0.128256	0.0244374	-0.122584	-0.0699957	-0.0811702	-0.291219	0.0916078	-0.0205945	0.303132	0.121254	-0.132989	-0.389345	-0.188434	-0.0446845	0.0422434	-0.20535	-0.217628	0.0070918	0.0109594	0.0203254	0.0212469	0.360496	-0.129139	-0.118914	-0.118136	-0.00130362	-0.0571785	-0.280676	-0.241089	-0.245566	0.0512476	-0.0553306	-0.117295	0.109025	-0.0350677	0.325469	-0.0615355	0.111918	-0.0149148
PC (14:1e/5:0)	0.283218	-0.465047	0.325481	-0.0733289	-0.505194	0.371485	0.126589	0.383389	0.221944	-0.470558	-0.336132	-0.428069	-0.512418	-0.0759663	-0.477577	0.179446	-0.325218	-0.463241	0.0741644	-0.344446	-0.0606382	-0.162255	0.258248	0.0588001	-0.251056	-0.17559	-0.166255	0.0789347	0.130248	0.0576451	-0.432089	-0.210817	0.00709951	0.128632	-0.137963	0.0792733	-0.0723724	-0.495765	0.204217	0.36943	-0.130816	-0.29973	0.311091	-0.325584	-0.053238	-0.203357	0.094563	-0.104092	-0.299308
Diosgenin	-0.0754025	0.155822	0.0152888	-0.294174	-0.0544138	0.0175478	0.20788	0.260054	-0.198582	-0.339302	-0.283908	-0.111815	-0.168385	-0.209965	-0.174428	0.0196535	0.100249	0.010506	0.0904262	-0.293535	0.584898	-0.25119	0.549142	0.0804786	-0.202085	-0.0551683	-0.244859	0.164988	0.188209	-0.396013	-0.093588	-0.183213	0.429293	0.489343	0.498447	0.179458	0.427	-0.162538	0.607795	0.40024	-0.115834	0.0355262	0.520303	-0.280516	-0.161865	-0.0857543	-0.193379	-0.254244	0.0380654
SM (d23:1/18:2)	0.0781083	-0.0436047	0.159371	0.0206716	0.075095	-0.185967	-0.232191	-0.146242	0.24051	-0.0529345	-0.105936	-0.223118	-0.0794568	0.11943	-0.176765	-0.118251	-0.00693732	-0.248178	-0.135363	-0.132134	0.0904664	-0.0647691	-0.0539731	-0.099081	-0.185112	0.247827	0.0306513	0.512196	-0.156571	0.359107	-0.225599	-0.534818	0.165585	-0.262982	0.0963647	0.513973	-0.1429	0.135076	-0.0637435	-0.289632	0.339513	-0.479933	-0.163636	-0.0823828	-0.0518823	-0.301146	-0.0117114	-0.057931	-0.198568
Lysope 14:0	-0.0122702	-0.078871	0.0969315	-0.209796	-0.249519	0.0660798	0.499619	0.294692	0.107332	-0.226364	-0.343514	-0.352627	-0.104284	-0.120363	-0.168694	0.438235	0.193824	-0.331101	0.446302	-0.354271	-0.0412253	0.0803064	0.0861039	0.0506543	-0.382375	-0.201691	0.0714028	-0.0017811	0.307669	-0.0749194	-0.352197	0.0951638	0.0605719	0.00477884	0.0185138	-0.0210883	-0.127101	-0.398891	0.0571543	0.285296	0.114319	0.0165004	-0.0258312	-0.320015	-0.329113	0.436028	0.00740252	-0.394926	-0.0882373
PC (3:0/16:2)	-0.0985339	0.183216	-0.0654027	0.148113	-0.0958562	0.0354903	-0.262565	0.0413346	0.203623	-0.0345576	-0.228484	-0.306036	-0.115594	-0.0651788	-0.140602	0.0402842	0.0543322	-0.20345	-0.287688	-0.219253	0.573671	-0.111454	0.466958	0.226564	-0.0348749	-0.305985	-0.350986	-0.25137	0.170443	0.209413	-0.286011	-0.208016	0.307539	0.212168	0.59555	-0.275033	0.291765	0.0165316	0.676292	0.386898	0.303944	-0.155621	0.323436	-0.203302	0.190172	-0.226105	0.104126	-0.0346121	-0.0584354
PC (14:0e/16:0)	-0.290289	0.45084	-0.35251	-0.310037	0.372682	-0.198856	-0.104123	0.665595	0.399312	0.376538	-0.348117	-0.144677	0.124244	-0.283849	0.0304881	0.739817	0.369227	-0.100407	-0.0541486	-0.336342	0.120481	0.513794	0.0379902	-0.0682818	-0.211171	-0.245477	0.326526	0.00155355	0.267828	0.136621	-0.138386	-0.110326	0.0610326	0.25317	0.0805635	-0.0103458	-0.00895676	-0.302896	0.00674153	0.0507284	0.329305	0.0159458	-0.0948584	-0.366032	-0.0713893	0.176797	0.513956	-0.493152	-0.0661774
D-(+)-Tryptophan	-0.169987	-0.0710697	0.309426	-0.260771	0.236425	-0.0063986	0.144865	-0.156547	0.31774	0.119898	-0.459203	-0.396868	0.300466	-0.352514	0.251324	-0.219031	0.0144539	-0.376662	-0.193446	-0.470088	0.0808867	-0.223018	0.0967789	0.363531	-0.559685	0.204351	-0.129961	0.121149	0.298477	0.387944	-0.393067	-0.386994	0.339094	0.149629	0.0817931	0.146647	0.172262	-0.301229	0.0502341	-0.0470379	0.510593	-0.080658	-0.00769055	-0.442485	-0.329256	0.0664937	-0.29641	-0.315744	0.210114
PC (8:0/8:0)	0.0776274	-0.521139	0.564642	0.266642	-0.706537	0.282343	0.451306	-0.362373	-0.421281	-0.506639	0.134241	-0.128077	-0.184551	0.173505	-0.157349	-0.292188	-0.201007	-0.151259	0.395319	0.106571	0.0453646	-0.536281	0.132542	-0.37203	0.0546521	-0.136704	-0.109745	0.230675	-0.320878	-0.211611	-0.131943	0.0809166	0.0751484	-0.359418	0.0568332	0.249924	-0.211093	-0.0244594	0.072563	0.050442	-0.261177	-0.12282	-0.00757443	0.147961	-0.0415277	0.176593	-0.346529	0.231677	-0.0887577
3-(propan-2-yl)-octahydropyrrolo[1,2-a]pyrazine-1,4-dione	0.0466491	-0.0198769	-0.190001	0.456286	0.00588219	-0.046824	0.137465	-0.401418	-0.618422	-0.172423	0.356732	0.0860307	-0.0771059	0.399178	-0.002506	-0.27181	0.240088	0.0924205	0.404933	0.369223	0.0366435	-0.0262442	-0.0414061	-0.277632	0.434871	0.200851	0.373439	0.0390305	-0.386846	-0.390417	0.0811999	0.413701	-0.0705515	-0.192413	-0.00955238	0.0126538	0.117186	0.236988	-0.0364668	-0.0601425	-0.424162	0.30438	-0.0707535	0.354788	0.178269	-0.115471	-0.133494	0.389666	0.215466
1,4-dihydroxy-1,4-dimethyl-7-(propan-2-ylidene)-decahydroazulen-6-one	0.415971	-0.694568	0.36603	0.226177	-0.31141	0.358732	-0.0484919	-0.241899	-0.0971123	-0.304267	0.397218	0.223077	-0.303519	0.115308	-0.167281	-0.333268	-0.596954	0.11393	0.0212899	0.397171	-0.400969	-0.450808	-0.161271	-0.0701714	0.348281	0.00477198	-0.205742	-0.28889	-0.133942	0.151791	0.210497	0.445933	-0.30988	-0.12812	-0.46162	-0.274982	-0.0910656	0.0234012	-0.181521	0.0619995	-0.343917	-0.0100697	-0.0088895	0.38532	0.193952	-0.246891	-0.165979	0.451882	-0.142983
Shikonin	0.0987757	-0.0884101	0.0988588	-0.0994903	-0.181615	-0.129889	0.112915	0.0723271	0.260029	-0.0224311	-0.103149	0.0185012	-0.114569	-0.151911	-0.250661	0.437077	0.104172	0.0679499	0.238842	-0.0897246	0.197759	-0.106906	0.319568	-0.252779	0.0318945	-0.254008	0.394633	0.178671	0.039022	0.212104	0.0226614	-0.2032	0.18074	0.101076	0.0579749	0.177702	-0.118225	-0.305443	0.388608	0.364334	0.151681	0.113741	0.185278	-0.111046	0.262118	-0.171652	-0.126364	-0.0708715	-0.228694
PC (18:3e/16:0)	-0.379976	-0.196964	0.427471	-0.0925889	-0.18291	0.283858	0.270347	0.241903	0.0161214	-0.138215	-0.150567	-0.123812	-0.0887136	-0.322371	-0.050086	0.111761	-0.110386	-0.127672	0.0245758	-0.180285	0.0285342	-0.10234	-0.0254526	0.00736039	-0.184593	-0.210523	-0.0606247	-0.0166049	0.266465	0.117857	-0.12059	-0.0858629	0.0423627	0.245763	0.00662481	0.0366437	-0.0633433	-0.282572	-0.231397	-0.223391	0.132194	-0.100186	-0.297099	-0.177968	-0.0776003	0.245903	0.212943	-0.268296	-0.0323522
Benzophenone	-0.0501179	-0.123034	0.238057	-0.103757	-0.348132	0.413317	0.160572	-0.0936344	-0.157797	-0.363923	-0.224204	-0.00586347	-0.499875	-0.0592742	-0.538217	-0.199114	0.198603	-0.00440574	0.0124578	-0.210877	0.229392	-0.11688	0.539464	0.210647	0.0447831	-0.0907208	-0.0202081	0.313379	-0.124846	-0.0199975	-0.00342622	-0.0243678	0.427958	-0.18704	0.0344461	0.310647	0.124446	-0.253771	0.366792	0.543845	-0.173208	-0.258043	0.529708	-0.254704	0.458662	-0.277388	0.361542	-0.119231	-0.0143117
Psoralidin	0.257475	-0.0538383	-0.0946417	-0.0319655	0.126286	-0.222914	0.0556619	0.00857119	-0.0852101	-0.0259227	-0.054413	-0.0183247	-0.0414966	0.224804	-0.136043	-0.111603	0.417477	-0.0593413	0.188527	-0.0470764	0.00505655	-0.105886	-0.0634717	-0.16505	-0.0944853	0.0059305	0.0104277	0.749155	-0.157492	-0.108958	-0.0257395	-0.0398316	0.120928	-0.273651	-0.113824	0.69277	-0.0875242	-0.197957	-0.0255341	-0.13882	0.182108	-0.253715	0.179686	-0.0539363	-0.125507	-0.0933997	-0.15027	-0.098926	-0.16015
PC (18:1e/22:3)	0.0958435	0.192765	-0.198166	0.0438978	0.0855738	-0.343727	-0.264605	0.287612	0.323315	0.0899909	-0.0908154	-0.123461	0.00206321	-0.0733763	-0.0506378	0.205274	-0.0725108	-0.105561	-0.233399	-0.0911934	0.0158095	0.225602	-0.16673	-0.169094	-0.153404	0.334682	0.153974	0.199471	-0.138745	-0.00633011	-0.123201	-0.532768	-0.138004	0.0936473	0.138156	0.212391	-0.0258882	0.190965	-0.101074	-0.320766	-0.0695135	-0.174745	-0.158851	-0.0833738	-0.130016	-0.119928	0.0478156	0.114417	-0.163535
2-(2,6-dimethoxyphenyl)-5,6-dimethoxy-4H-chromen-4-one	0.211094	-0.307266	0.221493	-0.329014	0.102838	0.0969573	0.0864932	-0.106506	0.218269	0.277726	-0.0183453	-0.0177192	0.364284	-0.203463	0.371375	-0.0975542	-0.201709	-0.0897347	0.030868	-0.0327725	-0.249508	-0.219536	-0.082627	-0.109858	-0.0898564	-0.0943043	-0.138577	-0.156167	-0.00337944	0.337998	-0.0258694	0.210865	0.0104243	-0.161451	-0.34792	-0.147167	-0.143139	-0.270009	-0.0785318	0.0883461	0.304833	0.0146041	0.0860804	-0.00181814	-0.215623	0.167908	-0.117986	-0.105557	0.027789
ACar 15:1	0.254874	-0.377129	0.202	0.0101803	-0.235891	-0.0263436	-0.1352	0.196435	0.416991	-0.0602159	0.413925	0.630614	-0.290036	-0.00412856	-0.376258	0.323503	-0.217552	0.613481	0.0649257	0.435397	-0.219024	-0.278596	-0.270208	-0.2071	0.284548	-0.286688	0.0118812	-0.0782217	0.084213	0.330315	0.632224	0.144648	-0.440732	0.107841	-0.136373	-0.0862426	-0.191839	0.00669415	-0.134037	-0.18221	0.0477735	0.0147262	-0.136452	0.367773	0.258043	-0.102279	-0.208379	0.253437	-0.398048
5-Methyltetrahydrofolic acid	-0.016931	0.149607	-0.0520071	-0.272825	0.267187	-0.0299973	-0.335284	0.243539	0.339538	-0.185714	-0.056304	0.117606	-0.354099	-0.190958	-0.352171	0.145778	-0.29377	0.165453	-0.270034	-0.0668468	0.0871309	0.15742	0.0578265	0.292037	-0.0547352	0.466097	0.081288	-0.205391	0.215477	0.225188	0.126309	-0.319647	-0.00177013	0.436288	0.142339	-0.161268	0.300768	0.261731	0.0184821	0.0213728	-0.121625	-0.0736405	-0.0524856	-0.0665915	0.0776261	-0.462844	0.190474	-0.0784276	-0.0339007
3,4-dihydroxy-4-(4-methoxyphenyl)-1,2,3,4-tetrahydroquinolin-2-one	0.173854	-0.534258	0.371363	0.576746	-0.551994	0.145664	0.116699	-0.0721531	-0.281964	-0.338007	0.121891	-0.131914	-0.249213	0.145286	-0.21381	-0.218823	-0.152145	-0.228607	-0.0199331	0.132539	-0.13246	-0.518627	-0.0950774	-0.398267	0.0818371	-0.289633	-0.257162	0.448767	-0.326319	-0.160105	-0.143088	0.214016	-0.0680627	-0.453555	-0.159512	0.437899	-0.272625	-0.10947	-0.133154	-0.12474	-0.258503	-0.37041	-0.131548	0.100888	0.0665505	0.135564	-0.133504	0.363489	-0.334606
O1-[4-(tert-butyl)benzoyl]-2-(tert-butylsulfonyl)ethanehydroximamide	-0.0379019	-0.584405	0.769703	-0.116527	-0.533476	0.51364	0.424744	-0.229887	-0.272051	-0.51325	-0.090834	-0.0224448	-0.233992	-0.108113	-0.191862	-0.411814	-0.378309	-0.0824357	0.0792028	-0.112764	-0.118629	-0.602755	0.197905	-0.0223378	-0.194109	0.00707054	-0.260364	0.311284	-0.133726	-0.0899206	-0.0284577	0.013931	0.201322	-0.227533	-0.172297	0.368107	-0.0817291	-0.218314	-0.0547555	0.145591	-0.290303	-0.229016	0.125567	-0.113352	-0.0875563	0.118478	-0.271445	-0.00987332	0.0157927
3-(tert-butyl)-1-methyl-N-(6-quinoxalinyl)-1H-pyrazole-5-carboxamide	0.267159	-0.401977	0.172674	0.202589	-0.100998	0.0713338	-0.0932681	0.0185611	-0.160678	-0.125039	0.271913	0.0771158	0.0628051	0.177071	0.205318	-0.127992	-0.637308	-0.0119298	-0.0776649	0.268343	-0.424263	-0.327829	-0.317198	-0.23377	0.0577896	0.00783048	-0.220535	-0.0934964	-0.0866928	-0.196955	0.0640832	0.214758	-0.39838	0.0157165	-0.375179	-0.0708398	-0.162007	0.0753985	-0.311149	-0.206661	-0.37646	0.0735989	-0.190198	0.271009	-0.27993	0.0340725	-0.477553	0.332017	-0.0922966
SM (d27:1/14:0)	-0.0386039	0.337773	-0.34104	-0.113063	0.418489	-0.320601	-0.309111	0.174191	0.271234	0.404296	-0.0655057	0.0215343	0.197389	0.228922	0.095214	0.178061	0.390164	0.0307263	-0.0560931	-0.0573588	0.0320065	0.375235	-0.184292	-0.0605114	-0.0746428	0.00822609	0.250731	0.402145	-0.0331578	0.143522	0.0208722	-0.420564	-0.0815979	0.0307922	0.0195785	0.358235	-0.0859214	-0.0553726	-0.116902	-0.410047	0.432451	-0.0905218	-0.0125287	-0.065028	-0.0534289	-0.20347	0.0606116	-0.178224	-0.0138549
PC (16:2e/3:0)	0.148696	-0.495367	0.342729	-0.0051593	-0.273987	0.233368	0.409742	0.245683	-0.0228467	-0.434183	-0.198103	-0.226633	-0.31146	-0.0804833	-0.238331	0.105637	-0.312647	-0.328675	0.184875	-0.203318	-0.577066	-0.0835255	-0.258664	0.219666	-0.371057	0.0903723	0.00531636	0.165092	0.338754	-0.141616	-0.244804	0.0685504	-0.238284	0.0895641	-0.57542	0.186331	-0.235885	-0.430331	-0.484984	-0.0505269	-0.295935	-0.0342239	-0.256911	-0.211201	-0.299439	0.190038	-0.174975	-0.12758	-0.152678
PC (18:4e/24:4)	0.0720779	-0.0691812	0.176917	0.094474	-0.293679	-0.0663497	0.0404567	-0.166832	-0.108463	-0.11442	-0.0144688	-0.241578	-0.0225663	0.111543	-0.0477201	-0.039146	-0.142716	-0.281729	0.0851857	-0.055574	0.0221336	0.048463	0.0269651	-0.341327	-0.0246566	0.088022	0.130461	0.366717	-0.310706	-0.0175729	-0.249989	-0.415082	0.115436	-0.344077	-0.0283071	0.394907	-0.374491	0.122494	-0.0602725	-0.114061	-0.0357048	-0.29117	-0.136477	0.0183885	0.00992838	-0.0560144	0.0989375	0.0313102	-0.206987
Carnitine	0.294933	-0.052058	-0.114602	-0.000725214	0.112889	-0.241699	-0.0235173	0.0802003	-0.0536774	-0.0405137	-0.083231	-0.0730092	-0.0630349	0.24267	-0.151441	-0.0486842	0.338953	-0.114988	0.122839	-0.074364	0.0246475	-0.126591	-0.0268391	-0.186047	-0.114189	-0.0607386	-0.0467296	0.753738	-0.133692	-0.115853	-0.0801818	-0.0763622	0.120738	-0.241454	-0.100516	0.69558	-0.103747	-0.208144	0.0385262	-0.0830341	0.17511	-0.292189	0.206992	-0.0788951	-0.139854	-0.137724	-0.17416	-0.0956427	-0.229049
PC (16:0/17:1)	-0.052318	0.211253	-0.285055	-0.074978	0.518268	-0.289192	-0.156611	-0.0151502	-0.00763199	0.663225	0.295905	0.393634	0.662461	-0.193391	0.706388	-0.0842608	0.0412114	0.357215	-0.236442	0.302592	-0.201338	0.0699025	-0.43223	-0.0857408	0.174227	-0.0890718	-0.166862	-0.281758	0.0693278	0.0203661	0.390757	0.381802	-0.208008	0.0674613	-0.209636	-0.276956	-0.0335925	0.147481	-0.344443	-0.393707	0.224565	0.274871	-0.241685	0.281945	-0.138634	0.356458	-0.0342773	0.0562709	0.126405
Dl-Glutamic acid	-0.332841	0.444915	-0.303029	-0.171447	0.22103	0.0390925	0.116132	0.153497	-0.214183	0.141595	-0.367393	-0.289508	0.000504347	0.0236422	-0.0260228	0.132629	0.638704	-0.238958	0.171687	-0.368236	0.356813	0.491602	0.371732	0.102029	-0.056361	-0.125633	0.358007	0.308539	0.0351018	-0.176258	-0.285896	-0.215011	0.395545	0.112818	0.118083	0.283842	0.112585	-0.349933	0.230303	0.192316	0.181801	0.0326463	0.305658	-0.369841	0.169788	-0.133135	0.52686	-0.451727	0.199386
PC (20:0/22:5)	-0.408605	0.334174	-0.103929	-0.192812	0.292358	-0.306973	0.242221	0.203026	0.321226	0.280544	-0.334129	-0.204256	0.287151	-0.065634	0.120009	0.525091	0.543503	-0.134166	0.283089	-0.32855	0.0290326	0.374613	-0.144395	-0.0158624	-0.424052	0.0168373	0.596472	0.285714	0.249411	0.152652	-0.200226	-0.376749	0.021878	0.131527	0.143619	0.271545	-0.096837	-0.271507	-0.192365	-0.319254	0.481069	0.180171	-0.368052	-0.338169	-0.283676	0.316892	-0.10491	-0.44334	0.151349
DL-Stachydrine	0.0561557	-0.384279	0.430048	-0.00664822	-0.226161	0.197972	-0.126801	-0.0105941	-0.00467111	-0.100268	0.204662	0.273924	0.0752161	0.191736	0.109942	-0.182461	-0.52118	0.242232	-0.161236	0.206355	-0.13895	-0.574293	-0.0839436	-0.248127	-0.0290632	-0.229404	-0.366158	0.159432	-0.146619	-0.0477455	0.273457	-0.0687538	-0.225429	0.0120834	-0.0472948	0.181355	-0.094773	0.00765165	-0.0500461	-0.219208	-0.10467	-0.0751824	0.0701225	0.181003	-0.214894	-0.00280647	-0.655917	0.212229	-0.0537034
Capryloylglycine	-0.227124	-0.0608269	0.255869	0.0373868	-0.376757	0.225347	0.0960929	-0.286897	-0.12455	0.0264174	0.228544	0.528805	-0.0778944	0.115717	-0.12775	0.0111383	-0.0111071	0.541801	0.0553281	0.24723	-0.0243223	-0.0482783	0.167357	0.0767692	0.302821	-0.415926	0.180906	0.0651985	0.0202143	0.0276949	0.529833	-0.122289	-0.0267891	0.0146479	-0.104944	0.0838314	-0.25708	-0.0660627	0.0794608	0.0981555	-0.043122	0.237509	0.128693	0.181599	0.575982	-0.101141	-0.132159	0.0844174	-0.000559267
Oleoyl ethanolamide	0.340615	-0.3895	0.196658	0.184681	-0.558296	0.22364	0.162297	0.00670764	-0.10151	-0.35191	-0.108158	-0.283178	-0.349332	0.0128298	-0.324816	0.000622878	-0.147403	-0.309984	0.16497	-0.103708	0.0855343	-0.255319	0.372116	-0.194003	0.084957	-0.246189	-0.0507165	0.121784	-0.17757	-0.0966438	-0.28807	0.0121127	0.142144	-0.134912	-0.0854363	0.110431	-0.107353	-0.319666	0.394107	0.50868	-0.246331	-0.140195	0.405751	-0.0949513	0.217934	-0.19236	0.0314276	0.162875	-0.25949
11β-Prostaglandin F2α	-0.372412	0.18261	0.0757193	-0.242083	-0.240614	0.249617	0.53635	0.168181	-0.202247	-0.336016	-0.430656	-0.321242	-0.307513	-0.155758	-0.334001	0.21231	0.369915	-0.252804	0.407771	-0.447075	0.207442	0.387682	0.372278	0.172869	-0.24666	0.153102	0.475642	0.181661	0.0932961	-0.287569	-0.317541	-0.293544	0.304451	0.159018	0.140174	0.207497	0.0883225	-0.316856	0.0963929	0.261347	-0.215871	0.080752	0.122635	-0.437676	0.0541334	0.0845503	0.40321	-0.410102	0.203511
gamma-Glutamyltyrosine	-0.0604583	0.188042	-0.113155	-0.263642	0.14093	-0.030498	-0.148071	0.263648	0.298493	0.334074	-0.319098	-0.141563	0.145676	-0.345278	0.0936601	0.185897	0.226324	-0.0644123	-0.198999	-0.309139	0.516191	-0.00936902	0.498503	0.0793948	-0.0344619	-0.474501	-0.121107	-0.0102117	0.245996	0.248314	-0.127176	-0.309884	0.389071	0.451599	0.255016	-0.0218505	0.194586	-0.473494	0.634227	0.363908	0.516773	0.0174914	0.564649	-0.320221	0.229984	-0.263406	0.193411	-0.290276	-0.0659567
PE (18:2/18:2)	0.0453152	0.349038	-0.370244	0.293785	0.0793297	-0.456996	-0.571517	0.214783	0.180581	0.341102	0.241995	0.263612	0.153789	0.194068	0.0704064	0.351944	0.0230385	0.309443	-0.348712	0.266249	0.275931	0.019756	-0.0351936	-0.332442	0.25712	-0.484968	-0.167165	0.102644	-0.058978	0.00361663	0.273249	-0.181053	-0.128049	0.060809	0.329351	0.0679434	-0.153337	0.302215	0.268339	-0.140955	0.212793	-0.0803099	-0.0171892	0.238547	0.198161	-0.118414	-0.10834	0.202451	-0.366537
LPE 20:3	0.133594	-0.360961	0.202102	0.516333	-0.362702	0.279829	-0.329407	0.0238301	-0.0321075	-0.138157	0.099088	-0.273092	-0.177245	0.302881	-0.0761672	-0.171619	-0.348642	-0.349052	-0.298125	0.0982145	-0.0192385	-0.332455	-0.0367603	-0.113551	0.118571	-0.524979	-0.605118	-0.080202	-0.0952267	0.140674	-0.275958	0.166269	-0.14894	-0.25695	0.0075671	-0.113453	-0.175538	-0.00583025	0.0603297	-0.0365131	0.0949803	-0.438845	-0.0237008	0.113532	0.0569519	-0.0753624	0.0671147	0.246538	-0.293016
LPE 20:5	0.338596	-0.397298	0.169115	0.162337	-0.316344	0.12651	-0.309371	0.371398	0.427665	-0.0800839	0.0050036	-0.155587	-0.199794	0.101737	-0.140119	0.266713	-0.617542	-0.2427	-0.277148	0.00198972	-0.368121	-0.0973878	-0.235553	0.0743397	-0.108837	-0.410257	-0.43053	-0.182692	0.294772	0.263929	-0.164068	-0.151435	-0.42618	0.128361	-0.303305	-0.192972	-0.364364	-0.187393	-0.134002	-0.0668671	0.115074	-0.268938	-0.10717	0.020677	-0.0891218	-0.109531	-0.0882887	0.0872165	-0.47636
LPE 20:4	0.409818	-0.241197	-0.102665	0.52833	-0.309399	-0.0642675	-0.570036	0.226343	0.248462	0.0435618	0.31517	-0.0665437	-0.0961483	0.529371	-0.052204	0.158928	-0.429908	-0.141596	-0.237751	0.324147	-0.237776	-0.0721656	-0.365638	-0.383686	0.201997	-0.398264	-0.367033	-0.0748111	-0.245754	0.0858846	-0.0734902	-0.0408468	-0.589609	-0.245318	-0.0523236	-0.129719	-0.374155	0.215538	-0.102034	-0.321607	0.00676997	-0.342161	-0.146891	0.341085	-0.0568946	-0.129472	-0.120461	0.459768	-0.455933
o-Cresol	-0.463329	0.184571	0.178317	0.24327	-0.363918	0.369152	0.100671	-0.245865	-0.491083	-0.317404	-0.313011	-0.355882	-0.229739	0.232861	-0.186024	-0.256193	0.0966107	-0.318968	-0.121599	-0.31622	0.340154	0.0722499	0.53297	0.283529	-0.101888	-0.171604	-0.0410739	0.31227	-0.0620027	-0.315471	-0.351955	-0.383849	0.430789	-0.092677	0.25669	0.327532	0.0213445	-0.0524586	0.316333	0.297775	-0.194415	-0.152334	0.244254	-0.315192	0.28264	-0.156947	0.154011	-0.138698	0.183455
Indole-3-acetic acid	-0.0454707	-0.237339	0.179119	0.00869337	-0.0969611	0.327898	0.352041	-0.181808	-0.291883	-0.152285	-0.10012	-0.157198	-0.00412576	-0.325336	0.0936905	-0.346205	0.0597635	-0.116146	0.153581	-0.0873215	0.254861	-0.363784	0.399297	-0.037057	0.10621	0.0882132	0.0171132	-0.287145	-0.15836	-0.130431	-0.15091	0.403981	0.296946	0.127053	0.108221	-0.267539	0.468349	-0.263207	0.354609	0.426465	-0.272701	0.260917	0.377909	-0.114395	0.0856499	0.0241652	0.00343859	0.138174	0.350502
Riboflavin	-0.241358	-0.231747	0.382236	-0.090371	-0.206622	0.165738	0.375548	0.0895632	-0.215586	-0.0657907	-0.0326582	0.0838139	0.0634319	-0.000921004	0.0885266	0.00698873	-0.0255705	0.0536534	0.215168	-0.0533377	-0.144639	-0.118782	-0.115316	-0.0188626	-0.15558	-0.332298	0.0357937	0.412676	0.256947	-0.169827	0.0774699	-0.266371	-0.0707777	0.276047	-0.26308	0.444693	-0.293291	-0.444233	-0.305702	-0.37999	0.113457	0.101702	-0.128812	-0.0634822	-0.102682	0.156432	-0.2781	-0.234779	-0.0323497
3-Methyladipic acid	0.283576	-0.235578	0.0128986	0.356751	-0.164007	-0.134858	-0.0925645	-0.232776	-0.235073	0.106196	0.330852	0.283977	0.145514	0.254757	0.144897	-0.163187	-0.0719313	0.230577	-0.014706	0.362211	-0.106565	-0.387009	-0.0599092	-0.388444	0.309239	-0.329536	-0.0834521	0.299626	-0.301772	-0.174844	0.27545	0.209632	-0.11961	-0.247607	-0.20991	0.271955	-0.220819	-0.0144802	0.0742063	-0.0205612	-0.131552	0.08188	0.142498	0.313455	0.174636	-0.0538755	-0.467831	0.410642	-0.175965
PC (16:0e/18:2)	-0.300572	0.328436	-0.162394	-0.280036	0.538698	-0.308771	0.0774653	0.301755	0.485852	0.427797	-0.481546	-0.310096	0.342376	-0.629069	0.280966	0.383405	0.202529	-0.304145	-0.261318	-0.480865	-0.139767	0.436763	-0.190451	0.409696	-0.501787	0.207783	0.249541	-0.100822	0.582093	0.359455	-0.311339	-0.25444	0.140033	0.336378	-0.154983	-0.0681093	0.00967682	-0.285894	-0.309905	-0.139483	0.457194	0.0984222	-0.428422	-0.485296	-0.206617	0.285768	0.29736	-0.49187	0.0675034
Jasmonic acid	0.0537739	-0.0755727	0.214439	-0.377961	-0.0536929	0.129194	0.0400359	0.138882	0.1025	-0.256118	-0.219067	-0.00148157	-0.215318	-0.360811	-0.237649	-0.120717	-0.0680773	0.095166	-0.0804798	-0.229287	0.559008	-0.431005	0.564676	0.127021	-0.103681	-0.0397692	-0.332431	0.0329138	0.160812	0.0545967	0.017344	-0.217815	0.444517	0.461588	0.41798	0.0578415	0.451726	-0.197798	0.649045	0.420007	0.0921362	-0.0900241	0.597348	-0.22277	0.0400456	-0.317827	-0.113092	-0.163953	-0.0299183
N-α-Acetyl-L-lysine	0.427028	-0.455951	0.20825	-0.124937	0.101308	-0.101744	-0.0657353	0.135193	0.151445	0.118225	0.133029	0.219449	0.11138	-0.20933	0.0969582	-0.164659	-0.18172	0.0980183	-0.160595	0.136079	-0.281911	-0.504196	-0.275696	-0.320242	-0.0159608	-0.108909	-0.364574	0.375202	-0.108656	0.16735	0.207521	0.284525	-0.0661707	-0.211042	-0.423818	0.372002	-0.157381	-0.224405	-0.238362	-0.189818	0.135117	-0.298352	0.0307344	0.109117	-0.182444	0.0749873	-0.175998	0.0834196	-0.33131
Eicosapentaenoic acid	0.0497856	-0.233796	0.302224	-0.25974	-0.37024	0.400374	0.35567	-0.107993	-0.044564	-0.316898	-0.262869	-0.173214	-0.261915	-0.18997	-0.247665	-0.0274243	-0.102678	-0.15175	0.219217	-0.270815	0.111867	-0.124393	0.517116	0.268523	-0.0812383	-0.115	0.00722252	-0.151627	0.166886	0.0401761	-0.171293	-0.0218264	0.317144	0.113453	-0.0556588	-0.131831	0.0669287	-0.382629	0.416384	0.682356	-0.0915145	0.0913452	0.465419	-0.253071	0.191912	-0.130079	0.0512326	-0.191468	0.0539605
Asparagine	0.265064	-0.222223	-0.100895	0.56789	-0.305351	-0.100027	-0.0710852	-0.00529615	0.0552991	-0.0840776	0.172412	-0.115078	-0.158604	0.301198	-0.126604	0.0472049	-0.0750175	-0.135957	0.0928138	0.200146	-0.224549	0.0574768	-0.267475	-0.166108	0.152298	0.049447	0.234476	0.0160203	-0.186284	-0.103217	-0.123422	-0.154708	-0.452913	-0.000260199	-0.112301	-0.0167539	-0.148364	0.00583516	-0.144439	-0.289027	-0.250709	0.0978873	-0.149601	0.17554	0.107887	-0.15849	-0.224501	0.500922	-0.131954
Indole-3-lactic acid	0.269892	0.0747237	-0.48797	0.570819	0.11756	-0.338518	-0.239274	-0.0854369	-0.14009	0.213077	0.435101	0.160204	0.0118174	0.240204	0.0502139	0.0510143	0.187267	0.125186	0.0694519	0.463877	-0.142332	0.232215	-0.347436	-0.314362	0.527255	0.0402135	0.288291	-0.144824	-0.278618	-0.0997694	0.151884	0.365971	-0.35287	-0.167	-0.155838	-0.19188	-0.0935303	0.280396	-0.185392	-0.235909	-0.197572	0.178402	-0.248654	0.433682	0.307677	-0.110357	0.178346	0.502168	-0.131001
Glycerophospho-N-palmitoyl ethanolamine	0.0955644	0.113849	-0.344445	0.508677	0.275738	-0.301684	-0.452955	0.0859168	0.157863	0.162257	0.103571	-0.153482	-0.0152746	0.29385	-0.0192429	0.00897323	0.194208	-0.170439	-0.253036	0.127843	0.00692315	0.0792724	-0.331895	0.00680364	0.0727777	-0.0579002	-0.142242	0.062855	0.0143736	0.16234	-0.15334	0.0521297	-0.224551	-0.0766616	0.118227	-0.00419029	0.0366275	0.186559	-0.131743	-0.399852	0.272356	-0.216083	-0.285461	0.112526	-0.00970505	-0.143235	0.0429277	0.204986	-0.162678
N-lactoyl-phenylalanine	0.19281	0.297384	-0.452214	-0.268645	0.267473	-0.31322	-0.266776	0.706317	0.39795	0.109527	-0.198079	-0.067512	-0.18267	-0.0774033	-0.251591	0.555623	0.239868	-0.000166369	0.0167295	-0.192513	0.275037	0.346255	0.105998	-0.0465726	-0.0679722	-0.114162	0.129074	0.157209	0.248904	-0.00285393	-0.0588473	-0.391369	-0.0322678	0.554882	0.173501	0.121173	0.132063	-0.254263	0.277246	0.0235037	0.222541	-0.0469921	0.290601	-0.193817	-0.0247296	-0.363138	0.230639	-0.25681	-0.282058
L-Glutathione oxidized	-0.373688	0.579135	-0.358413	-0.417462	0.610145	-0.240974	-0.171797	0.429109	0.430614	0.657987	-0.502728	-0.277292	0.569699	-0.252081	0.501447	0.327113	0.366603	-0.217639	-0.30993	-0.493648	0.148515	0.466013	0.00815882	0.257784	-0.47944	-0.116716	0.0401675	0.0369142	0.359075	0.146803	-0.269146	-0.448498	0.137866	0.380161	0.155878	0.0241015	0.123818	-0.328214	0.0348993	-0.163173	0.619397	0.0753837	0.067274	-0.497161	-0.348278	0.184986	0.135671	-0.552781	0.234244
2'-Deoxycytidine	0.0862378	-0.369271	0.404395	-0.33985	-0.0601549	0.170135	0.30424	-0.161169	0.0961626	-0.0562435	0.0738845	0.307348	0.14568	-0.315528	0.128777	-0.24168	-0.192723	0.308591	0.0897339	0.0781863	-0.121264	-0.528227	-0.00398094	-0.0122125	-0.0958435	0.135859	-0.166705	-0.14584	-0.0166762	0.104955	0.310159	0.284157	0.0130975	0.015772	-0.0669731	-0.113595	0.18069	-0.104768	-0.00603249	0.0836009	-0.0534306	0.160772	0.134661	0.0513068	-0.205142	0.244258	-0.448991	0.0642885	0.174137
PC (22:5e/2:0)	0.325593	-0.303927	0.198092	-0.0454825	-0.424911	0.20307	0.0510112	0.0527223	-0.0221706	-0.299066	-0.105205	-0.161963	-0.272078	-0.0506699	-0.246414	0.0324913	-0.316822	-0.167284	0.0648338	-0.108632	0.132971	-0.273875	0.440559	-0.158087	0.0527282	-0.188315	-0.102951	0.0394667	-0.113805	-0.0687268	-0.16302	-0.0962089	0.175778	0.0319033	-0.0401218	0.0499965	-0.0358502	-0.244001	0.474446	0.564725	-0.237201	-0.0829012	0.492573	-0.0907936	0.153169	-0.280881	-0.0695686	0.0878438	-0.219147
Indole-3-pyruvic acid	0.441198	0.0655364	-0.500572	0.601672	0.200906	-0.550446	-0.284181	-0.240215	-0.255974	0.129919	0.628023	0.341093	0.0712819	0.14928	0.122406	-0.105617	-0.0287796	0.293805	-0.0446845	0.647188	-0.1741	0.00484093	-0.457499	-0.347429	0.579947	0.249781	0.0440044	-0.206195	-0.289621	-0.190159	0.33242	0.57081	-0.325656	-0.251613	-0.135664	-0.232564	-0.0594168	0.641211	-0.225044	-0.22951	-0.356073	0.158126	-0.385812	0.637628	0.198026	-0.0204746	-0.0296291	0.656575	-0.228406
Corticosterone	-0.163942	-0.0169586	0.325895	-0.309181	-0.122347	0.18757	0.0638608	-0.174658	-0.0301637	0.0791117	-0.175368	0.0461571	0.230196	-0.307503	0.207986	-0.222003	-0.150273	0.103601	-0.204925	-0.180498	0.39906	-0.411917	0.544112	-0.0364707	-0.0753357	-0.209717	-0.244263	0.0434039	-0.0761129	0.0469505	0.0578804	-0.217916	0.467238	0.110545	0.257871	0.0896956	0.169186	-0.157105	0.537535	0.398506	0.104656	0.0214789	0.504461	-0.183255	0.0839042	-0.0411336	-0.214189	-0.10289	0.142822
Cytidine	0.266718	-0.150608	-0.145116	0.543754	-0.00419935	-0.304107	-0.0406388	-0.101926	-0.270474	-0.143633	0.240836	0.0187202	-0.16243	0.150654	-0.147484	-0.0513444	0.0472393	-0.0553976	0.0434533	0.261659	-0.208179	-0.0979059	-0.277403	-0.333461	0.222086	0.183768	0.214446	0.36083	-0.269472	-0.207311	0.00451401	0.263924	-0.132141	-0.306387	-0.259646	0.343977	-0.15268	0.170251	-0.274915	-0.190487	-0.358574	-0.0659944	-0.329742	0.226366	0.124574	-0.0584558	-0.0607232	0.392323	-0.246845
Biotin	-0.0719522	-0.125372	0.157507	0.135896	-0.302163	0.298113	0.0600968	-0.42835	-0.0921223	0.0315373	0.189144	0.364397	-0.137644	-0.0762297	-0.14726	-0.294684	0.141474	0.403108	-0.0167893	0.219474	0.21867	-0.182701	0.355514	0.201959	0.441526	-0.26962	0.0189136	-0.244022	-0.0717751	0.181106	0.372259	0.137747	0.157652	0.0199539	0.077697	-0.247327	0.135377	-0.076167	0.383939	0.343238	0.00358152	0.213098	0.40476	0.154802	0.725237	-0.252584	0.0970602	0.251287	0.121316
13-Hpotre(R)	0.166044	-0.516559	0.465173	0.239533	-0.638254	0.460421	0.205125	-0.320879	-0.429269	-0.493765	0.16041	0.0269192	-0.330056	0.130944	-0.229579	-0.367335	-0.398244	-0.0152971	0.104764	0.154381	0.0116853	-0.533343	0.312379	-0.0897381	0.229279	-0.248539	-0.304001	-0.019716	-0.199173	-0.188752	0.0230235	0.255134	0.100923	-0.200696	-0.098424	-0.000456204	-0.0726962	-0.0568436	0.250321	0.40504	-0.41664	-0.0697529	0.292853	0.156661	0.245379	-0.10835	-0.191612	0.286403	-0.0930053
gamma-Muurolene	0.372811	0.141517	-0.449193	0.00096401	0.240239	-0.201214	-0.233204	-0.0985261	-0.14332	0.381994	0.224905	0.27488	0.176288	0.00709626	0.179714	-0.163067	0.2846	0.254214	-0.0515571	0.250407	0.153559	0.0359321	0.154277	-0.20985	0.476566	-0.167272	-0.0397145	0.0190082	-0.284997	-0.079763	0.272423	0.335886	0.130085	-0.123197	-0.131218	-0.0277029	0.0794088	-0.0229472	0.33215	0.285468	0.023242	0.100059	0.523974	0.224202	0.367188	-0.2617	0.225036	0.195872	-0.0655397
6-Keto-prostaglandin f1alpha	0.150074	-0.121588	0.0824447	0.308231	-0.433421	0.145076	-0.0946121	-0.317066	0.0179734	-0.310241	0.071436	-0.0852127	-0.349866	0.266575	-0.377781	-0.0723858	-0.0801085	-0.0244092	0.0871818	0.0869218	0.265538	-0.16328	0.373702	0.0259604	0.221587	-0.0582593	0.0426137	-0.175773	-0.193709	0.0993475	-0.0770659	-0.107299	0.0736874	-0.117143	0.322784	-0.200286	0.0935113	0.162818	0.523648	0.418611	-0.137446	-0.00725681	0.294345	0.0933037	0.3785	-0.370959	-0.131147	0.323067	-0.0431076
L-Dopa	0.169606	-0.017847	-0.136853	0.240064	0.188924	-0.365156	-0.0295828	0.0192177	-0.0888444	-0.0112184	-0.00458158	-0.0887233	-0.0284325	0.0441762	-0.086294	0.0408667	0.197337	-0.156838	0.00241503	0.00990319	-0.161789	-0.0157079	-0.224409	-0.311684	-0.0465292	0.238552	0.261612	0.595129	-0.232248	-0.0965384	-0.10184	0.0611568	0.0379403	-0.345362	-0.229298	0.579521	-0.150509	0.0296928	-0.274447	-0.200292	-0.116885	-0.195922	-0.275373	-0.016994	-0.0610596	0.00604894	-0.0107766	0.0940957	-0.202797
Cinnamoylglycine	-0.130962	-0.304914	0.382009	-0.268982	0.0559614	0.251511	0.444052	-0.140774	0.0363234	-0.0946702	-0.197946	-0.037051	0.120853	-0.413677	0.116503	-0.188775	0.072441	0.00870479	0.173839	-0.184388	0.107793	-0.51953	0.234913	0.151783	-0.217576	0.0304514	-0.0609108	-0.203458	0.183834	0.15856	-0.0283434	0.367185	0.266183	0.181008	0.0782818	-0.185481	0.403798	-0.383232	0.201856	0.299049	0.114244	0.25456	0.186155	-0.219466	-0.186935	0.238093	-0.351733	-0.135147	0.332728
LPC 18:3	0.412343	-0.497341	0.281799	0.362364	-0.616969	0.268344	-0.0598257	-0.175605	-0.172447	-0.449693	0.119811	-0.16494	-0.419722	0.515525	-0.391696	-0.184254	-0.301923	-0.250362	0.122177	0.117804	-0.145626	-0.320528	0.0967829	-0.233948	0.127919	-0.232721	-0.210651	0.323307	-0.351307	-0.0794939	-0.176773	-0.0093559	-0.105416	-0.478303	-0.174232	0.287844	-0.322666	-0.0385263	0.123665	0.183792	-0.244943	-0.374532	0.218521	0.140939	0.121763	-0.266922	-0.179858	0.302966	-0.324761
Creatinine	0.175701	0.0461519	-0.125101	-0.0236408	-0.280626	-0.0167507	-0.375391	0.338005	0.493277	0.0823128	0.229097	0.341443	-0.304829	-0.00674954	-0.376454	0.41637	-0.124453	0.373373	-0.121824	0.235099	0.091421	0.218184	-0.00927269	-0.132482	0.329585	-0.270372	-0.00521594	-0.292533	-0.0389533	0.287482	0.350174	-0.213212	-0.300376	0.126795	0.171356	-0.304467	-0.139249	0.164752	0.165399	0.00409091	0.0661973	-0.137539	0.102913	0.219498	0.419219	-0.254852	0.391399	0.174484	-0.378024
Indole	-0.33906	0.0961269	0.163976	-0.354728	0.257581	0.0747902	0.0986533	0.26574	0.131489	0.0364818	-0.358429	-0.0847719	0.158381	-0.457075	0.186812	0.0412991	-0.109401	-0.00634407	-0.238968	-0.357162	0.228295	-0.178189	0.236951	0.332571	-0.382473	-0.00475248	-0.151181	-0.0784039	0.469791	0.0034715	-0.071827	-0.259454	0.238768	0.689679	0.184415	-0.027383	0.376673	-0.317142	0.175013	0.0658879	0.141215	0.196378	0.135214	-0.383447	-0.234067	0.0259924	-0.250897	-0.332999	0.222992
Hippuric acid	0.0553377	-0.163501	0.056645	0.027558	0.274215	0.056759	-0.377124	0.0877923	0.415285	0.053219	-4.29591e-05	-0.116585	0.0469469	0.0822933	0.073267	0.0875079	-0.334748	-0.0974588	-0.192736	0.0193407	-0.0504304	-0.243995	-0.0668201	-0.0411999	-0.084042	0.098669	-0.0295676	-0.37922	0.0117823	0.393456	-0.110492	0.100644	-0.202694	0.148488	0.111559	-0.389706	0.277453	0.0527711	0.0710446	-0.0118586	0.122654	0.0416236	-0.081296	0.00325265	-0.231645	-0.1988	-0.325109	0.141755	0.127036
Propionyl-L-carnitine	-0.0566276	-0.23959	0.384852	0.0412686	-0.416421	0.196686	0.0135697	-0.242236	0.040997	-0.0322953	0.199229	0.513791	-0.151509	0.0503348	-0.225828	-0.0792836	-0.122659	0.485029	-0.114976	0.217417	-0.10803	-0.25212	0.0723786	0.111101	0.187802	-0.41115	-0.0876175	0.224526	0.0480509	0.17529	0.512199	-0.149061	-0.029676	-0.0967287	-0.170743	0.238525	-0.310288	-0.0868291	0.0162913	0.0277325	0.0615274	-0.0326376	0.111415	0.15199	0.498015	-0.110995	-0.188273	0.107229	-0.192441
Pantothenic acid	-0.222379	0.12056	0.0688373	-0.308267	0.0579982	0.184504	0.309588	0.129095	-0.0559439	-0.303461	-0.383523	-0.271515	-0.0111148	-0.323767	-0.000722816	0.0182763	0.012755	-0.150979	0.0822326	-0.370959	0.331544	-0.238956	0.454259	0.103332	-0.363796	0.336902	-0.0356711	-0.319783	-0.00489847	-0.267409	-0.254194	0.245657	0.334048	0.178602	0.493244	-0.295286	0.640472	-0.0106135	0.439043	0.563494	-0.353879	0.190628	0.285763	-0.381356	-0.414121	0.28626	-0.196149	-0.150716	0.438431
PC (20:4/22:6)	0.368539	-0.212624	0.0273333	-0.167327	-0.192486	0.287123	-0.136051	0.0878163	0.160695	-0.154333	-0.186511	-0.248214	-0.304695	0.062798	-0.297037	-0.0684394	-0.0559566	-0.26356	0.0190803	-0.185148	0.163197	-0.0856077	0.424587	-0.00469077	0.0531085	-0.12038	-0.154087	-0.00702475	-0.178666	0.161547	-0.247855	-0.0310607	0.193149	-0.106241	-0.00913279	-0.0413388	0.109695	-0.28293	0.489099	0.549836	0.0254784	-0.266375	0.655967	-0.16296	0.162482	-0.426196	0.258768	-0.0259433	-0.115746
PE (16:0/16:0)	0.115732	0.215896	-0.209394	-0.114895	0.0500962	-0.179143	-0.0944534	0.122947	0.0722729	-0.0281161	-0.244637	-0.164108	-0.0977078	0.117215	-0.213486	0.158067	0.369647	-0.0864452	0.0890466	-0.229388	0.46815	-0.0290316	0.45205	-0.0943491	-0.0735926	-0.168979	0.0530128	0.40417	-0.0673649	-0.0635954	-0.154165	-0.27635	0.352197	0.0501301	0.347181	0.355549	0.157158	-0.186258	0.609562	0.368746	0.200126	-0.110998	0.528334	-0.229148	0.0639084	-0.302432	-0.0801776	-0.164971	-0.0982607
7-Methylguanosine	-0.128798	0.285608	-0.231889	-0.336612	0.532662	-0.330423	0.0295908	0.119422	0.454995	0.552501	-0.278345	-0.0368158	0.427485	-0.185689	0.274721	0.207971	0.579148	-0.00527967	0.0292968	-0.258719	0.000895587	0.27556	-0.147204	0.142432	-0.305437	0.0404704	0.303962	0.234317	0.217707	0.331172	-0.0346801	-0.247282	0.0777016	0.118566	-0.0181755	0.198201	0.0436705	-0.343781	-0.0931797	-0.249478	0.663332	0.116715	-0.0141347	-0.284099	-0.173657	0.118015	-0.034276	-0.367124	0.157772
20-Carboxy-Leukotriene B4	-0.0330052	-0.0970385	0.0517231	0.370526	-0.227322	0.10695	0.0549244	-0.184094	-0.464318	-0.21207	0.0870163	-0.024887	-0.257288	0.399658	-0.244371	-0.233719	0.239978	-0.080579	0.135952	0.0936913	-0.0066358	-0.00584879	0.032803	-0.181158	0.187723	-0.102854	0.157873	0.615861	-0.328546	-0.275823	-0.0352187	-0.0391259	0.0621157	-0.345906	-0.147745	0.591143	-0.194156	-0.058851	-0.109644	-0.138921	-0.206715	-0.19834	0.0331002	0.065743	0.273114	-0.189067	0.101549	0.125613	-0.0742736
Testosterone	-0.418943	0.130939	0.248574	-0.123591	-0.427487	0.531361	0.166759	-0.0798161	-0.189679	-0.282066	-0.445092	-0.399606	-0.220876	0.0767112	-0.20819	-0.0885096	0.0635976	-0.300105	0.0460392	-0.450194	0.4965	0.0695217	0.77887	0.168638	-0.153046	-0.136979	0.121657	0.062037	-0.147692	-0.168451	-0.386866	-0.514472	0.451713	0.103289	0.427175	0.0841337	0.214457	-0.249586	0.61669	0.534923	-0.150605	-0.0269621	0.586464	-0.44106	0.218176	-0.238687	0.163833	-0.211039	0.323713
N2,N2-Dimethylguanosine	0.265653	-0.0815491	-0.162908	0.443392	-0.0769793	-0.179488	-0.254739	-0.00243064	-0.146861	0.0632441	0.125432	-0.0512615	-0.133662	0.243349	-0.139641	-0.120783	0.142243	-0.154761	-0.158718	0.139715	-0.117112	0.0540608	-0.16871	-0.322401	0.224226	-0.0928591	0.0288783	0.586366	-0.378599	-0.0829124	-0.0664974	-0.0540884	-0.0533725	-0.424349	-0.274758	0.549889	-0.306482	0.00377546	-0.176084	-0.233807	-0.0790555	-0.376534	-0.0374294	0.114591	0.269351	-0.223326	0.263792	0.261052	-0.348886
5-Methoxyindole-3-Carbaldehyde	-0.539223	-0.0575524	0.545186	-0.263691	0.0113926	0.288255	0.187263	-0.199133	0.141739	-0.146048	-0.192742	-0.00681738	0.126017	-0.127548	0.0534334	-0.0611472	-0.113348	0.0487828	-0.0638327	-0.200072	0.0866842	-0.393812	0.111993	0.165355	-0.409071	0.0453749	-0.142278	-0.125237	0.118338	0.292813	0.00665345	0.0829132	0.211875	-0.146616	0.354125	-0.085831	0.188983	0.104426	-0.0147501	0.0385268	0.210777	-0.0647294	-0.252031	-0.208946	-0.334537	0.410164	-0.341152	-0.2748	0.336698
Urethane	-0.0293039	-0.213914	0.3026	-0.133728	-0.0749985	0.0724722	0.00691007	0.0825374	0.328653	0.0467961	-0.106299	-0.249366	0.115313	-0.157654	0.0727591	0.0157136	-0.0251643	-0.197192	0.0758135	-0.133654	0.350778	-0.343383	0.12477	-0.2696	-0.12994	-0.198491	-0.177594	-0.0730891	-0.0235429	0.39847	-0.236426	-0.196287	0.117067	0.119283	0.379817	-0.0713747	0.11552	-0.185711	0.259723	-0.121832	0.506702	-0.184467	0.0645343	-0.0841585	-0.208012	0.00932097	-0.0931909	-0.0928669	-0.0384667
DL-α-Aminocaprylic acid	-0.171187	-0.0375856	0.328569	-0.0290521	-0.229945	0.13045	0.216488	-0.284202	-0.337446	-0.139782	-0.17922	-0.0193613	0.107058	-0.294195	0.126653	-0.393172	-0.126444	0.0122214	-0.249225	-0.181643	0.32572	-0.466197	0.469531	0.167113	-0.123404	-0.153808	-0.395924	0.205458	0.0589692	-0.218187	-0.0127562	-0.132783	0.514124	0.0736536	0.179054	0.254284	0.126142	-0.0931231	0.405854	0.360489	-0.0940354	-0.01345	0.348858	-0.189614	0.10172	0.0633773	-0.278807	-0.0401115	0.0698284
LPC 15:0	-0.33023	0.112726	0.198712	-0.414702	0.167551	0.218226	0.0662468	0.20486	-0.0450311	-0.120812	-0.324067	-0.0644245	0.0817424	-0.267841	0.147067	-0.0147198	-0.317255	-0.014727	-0.24529	-0.332555	0.103221	-0.134409	0.274993	0.321603	-0.386113	0.087864	-0.20735	-0.0866594	0.322646	-0.173125	-0.0560164	-0.183861	0.22052	0.470954	0.107449	-0.0247577	0.298897	-0.130983	0.125082	0.208205	-0.140309	0.122874	0.162842	-0.34053	-0.30924	0.0477965	-0.238478	-0.333406	0.266901
Lysopc 16:1	0.242945	-0.199014	0.124387	0.103115	-0.270743	0.193421	-0.132409	-0.116619	-0.1258	-0.220944	-0.0868375	-0.177774	-0.242667	0.0139288	-0.183206	-0.128968	-0.312054	-0.197068	-0.15443	-0.086488	0.177497	-0.24582	0.474942	0.0479437	0.13115	-0.241318	-0.221687	0.0148444	-0.0199629	0.00783052	-0.179302	-0.0681535	0.283978	0.0203641	-0.0641328	0.0213308	-0.0102004	-0.153636	0.497377	0.589975	-0.135214	-0.117657	0.463569	-0.0715849	0.320234	-0.42906	0.0106951	0.0866217	-0.194218
Nor-9-carboxy-δ9-THC	-0.1233	-0.492463	0.708765	-0.0212382	-0.51838	0.40091	0.41244	-0.231627	-0.248543	-0.273428	-0.0883556	-0.0595092	0.00899777	-0.20576	0.0461557	-0.311493	-0.3246	-0.108207	0.00615854	-0.109125	-0.0344932	-0.590447	0.197591	-0.0629834	-0.161721	-0.291628	-0.340102	0.203818	-0.00796999	-0.0328494	-0.0631735	0.0249885	0.233761	-0.160122	-0.124383	0.257984	-0.185165	-0.28525	0.0196114	0.133183	-0.0603778	-0.14042	0.0624327	-0.104388	-0.0439328	0.272614	-0.272504	-0.040892	-0.0374715
17-α-Methyltestosterone	-0.0351533	-0.167491	0.121597	0.216538	-0.522263	0.385218	0.154569	-0.209706	-0.424017	-0.198663	0.176894	0.0480172	-0.229396	0.555772	-0.193147	-0.104752	0.146185	0.0614886	0.454487	0.178486	0.139291	0.0163994	0.287876	-0.263053	0.36986	-0.405743	0.257132	0.193544	-0.357379	-0.277214	0.046229	-0.0976913	-0.0639746	-0.113677	0.0118426	0.161498	-0.169001	-0.203692	0.248573	0.106301	-0.188333	0.12672	0.39632	0.172113	0.369395	-0.275754	-0.0386564	0.163062	0.0807564
γ-Nonanolactone	0.241839	-0.340028	0.292802	-0.0446185	-0.460477	0.33679	0.178823	-0.141535	-0.170867	-0.362773	-0.118234	-0.177397	-0.298657	-0.0451465	-0.261287	-0.14514	-0.228644	-0.192595	0.123852	-0.126809	0.144988	-0.307951	0.504918	-0.0291732	0.0710539	-0.181739	-0.140699	0.0288235	-0.106605	-0.0491334	-0.179185	0.0318861	0.301816	-0.0934401	-0.0643551	0.0398754	-0.0149595	-0.2561	0.46676	0.6452	-0.212193	-0.0986491	0.508834	-0.103658	0.225863	-0.236567	0.0127856	0.0311565	-0.12197
5-Hydroxyindole	-0.114156	-0.295033	0.473098	-0.330892	-0.15544	0.541209	0.0905629	-0.138739	-0.00649234	-0.203574	-0.127289	-0.0521787	-0.006837	-0.025922	0.0601543	-0.224021	-0.421392	-0.0450086	-0.0256493	-0.139784	0.0217433	-0.3953	0.332432	0.140474	-0.151895	-0.0839134	-0.27577	-0.286601	0.015335	0.128745	-0.0469016	0.108295	0.148235	0.0340277	0.033796	-0.253241	0.184389	-0.150034	0.238537	0.385657	-0.0474387	0.0178437	0.318155	-0.125964	-0.160958	-0.0180713	-0.251874	-0.125376	0.268564
Allantoin	0.375985	-0.0375874	-0.312093	0.469204	0.110002	-0.234524	-0.426869	-0.304197	-0.0169729	0.214132	0.406235	0.196113	-0.0237389	0.050966	0.0159528	-0.181021	-0.0586368	0.160627	-0.21267	0.433015	0.0199242	-0.027919	-0.0515143	-0.208435	0.603039	0.0697538	0.0943877	-0.244463	-0.32019	0.189847	0.191586	0.281054	-0.0825134	-0.17237	-0.116106	-0.266059	0.0293403	0.316529	0.133701	0.0875985	-0.123879	0.0639399	0.031071	0.407605	0.549277	-0.4222	0.193532	0.568461	-0.162496
PE (20:3/20:4)	0.0362443	0.336529	-0.263233	-0.00263557	0.0675567	-0.419075	-0.0115652	-0.170161	-0.158155	0.0866809	0.192016	0.38006	0.0354917	0.194899	-0.116955	0.0621935	0.481272	0.450787	0.200458	0.201062	0.340842	0.0382198	0.120539	-0.179621	0.219044	-0.09116	0.180483	0.466166	-0.123947	-0.183342	0.387357	-0.167066	0.179994	-0.069054	0.279896	0.432889	-0.0511855	0.203298	0.270665	-0.0271763	0.133846	0.0707089	0.172898	0.18888	0.240812	-0.126531	-0.182931	0.0117348	-0.122968
N-Methyl-a-aminoisobutyric acid	-0.0365144	0.079098	0.00753459	-0.243447	0.214308	0.104644	-0.0651485	-0.114037	0.0180225	0.188537	-0.172625	-0.0402338	0.34964	-0.150284	0.400354	-0.162293	-0.289773	-0.0617912	-0.3224	-0.158305	-0.176564	-0.0778569	0.112147	0.217048	-0.217313	0.142364	-0.198414	-0.247062	0.00872788	-0.0417879	-0.0430406	0.150735	0.11315	-0.0733226	-0.147414	-0.222032	0.128477	0.0208695	0.063278	0.334883	-0.139275	0.132682	0.180818	-0.167588	-0.232716	0.165491	-0.206863	-0.0586696	0.286113
12-Hete	-0.58728	0.291692	0.121986	0.253481	-0.114208	0.256676	0.00593835	-0.302938	-0.335056	-0.161561	-0.327059	-0.498551	-0.0525058	0.200494	-0.0213782	-0.16741	0.143752	-0.428745	-0.114091	-0.339975	0.444568	0.117058	0.472576	0.264993	-0.138387	-0.124591	0.0408655	0.0732265	0.0263132	-0.051717	-0.488954	-0.352304	0.453696	-0.0403981	0.425998	0.0862721	0.110735	0.0458544	0.321197	0.204742	0.0972933	-0.0927409	0.0172214	-0.309583	0.171993	-0.119751	0.161263	-0.210382	0.281541
2-Methylbutyroylcarnitine	-0.0882096	-0.0633788	0.049577	0.421874	-0.255553	0.097088	0.0768848	-0.234085	-0.491488	-0.223114	0.108496	-0.0153822	-0.258376	0.389248	-0.23944	-0.205275	0.211936	-0.0600014	0.146554	0.115218	-0.0075534	0.0404031	0.0377614	-0.155392	0.216732	-0.0742862	0.238601	0.542541	-0.304249	-0.289409	-0.0252652	-0.0662664	0.0491495	-0.306341	-0.1331	0.52737	-0.204963	-0.00660567	-0.118254	-0.131935	-0.260017	-0.117699	-0.0352644	0.0869372	0.328929	-0.186004	0.0938555	0.15824	-0.0474104
Enterodiol	0.542241	-0.182136	-0.210065	0.329063	-0.190666	-0.0599068	-0.262885	-0.107252	-0.301898	-0.00160063	0.477905	0.330856	-0.0603809	0.051927	0.0599278	-0.290288	-0.315486	0.273264	-0.196792	0.489464	-0.0062389	-0.289871	0.00429047	-0.220202	0.574566	-0.225555	-0.506924	-0.268991	-0.241797	-0.253175	0.326486	0.515017	-0.131509	-0.107812	-0.144594	-0.285828	-0.019465	0.27002	0.225936	0.245052	-0.374318	-0.00220253	0.312823	0.484895	0.309162	-0.161017	0.0291107	0.540416	-0.299431
5-Hydroxytryptophol	-0.135685	-0.225649	0.404672	-0.053817	-0.2942	0.318862	-0.0648644	-0.00850436	0.24476	-0.201863	-0.151733	-0.0516613	-0.265875	-0.0928113	-0.319338	-0.011922	-0.0542248	0.0471242	-0.0546733	-0.143463	0.539511	-0.472644	0.562933	0.0385149	0.0131454	-0.394928	-0.155727	-0.0317581	0.0842828	0.359735	-0.0315763	-0.287032	0.293227	0.314365	0.470546	-0.0293217	0.279666	-0.284623	0.661843	0.329772	0.298416	-0.0901901	0.45324	-0.167844	0.291077	-0.385453	-0.166559	-0.0321449	-0.024158
Dl-Proline	0.166925	0.210366	-0.328628	0.181329	0.260111	-0.44795	-0.389212	0.191584	0.263281	0.208851	-0.0713257	-0.172763	-0.000642258	0.0542868	-0.106533	0.165021	0.324421	-0.148343	-0.160052	-0.0577349	0.312304	0.0743045	0.0157877	-0.313304	0.0343832	0.00716396	0.12892	0.430896	-0.196782	0.166078	-0.168871	-0.32332	0.114372	-0.0444792	0.244386	0.387305	0.0423202	0.0288518	0.202118	-0.176194	0.306493	-0.285021	0.0459927	-0.0628271	0.0829654	-0.322099	0.134284	0.0633523	-0.262429
PE (20:4/20:4)	0.303688	0.00464785	-0.143124	-0.0775592	-0.109842	0.0349212	-0.102372	0.0872347	-0.00532179	-0.109036	-0.201086	-0.257674	-0.189474	0.123658	-0.222553	-0.00160453	0.170789	-0.226061	0.0870118	-0.193531	0.380328	-0.0843514	0.504899	-0.137517	0.0480381	-0.176892	-0.0724583	0.235321	-0.203867	-0.0707985	-0.253181	-0.124428	0.316428	-0.0459059	0.185251	0.189322	0.142268	-0.241874	0.640361	0.523513	0.0393312	-0.177204	0.685554	-0.17481	0.125774	-0.389952	0.0835985	-0.0410358	-0.120566
Progesterone	0.194647	-0.366046	0.0951901	0.867237	-0.551067	0.0836008	-0.196718	-0.297627	-0.238307	-0.10644	0.450551	0.0572265	-0.202167	0.418843	-0.11782	-0.14671	-0.261286	-0.0132573	-0.0545006	0.470048	-0.167149	-0.179912	-0.179845	-0.291847	0.513095	-0.385712	-0.041382	-0.0525106	-0.294675	-0.025934	0.0471053	0.124197	-0.366316	-0.280096	-0.167474	-0.0757532	-0.36937	0.163073	-0.0848146	-0.184014	-0.241686	-0.0388235	-0.207701	0.44475	0.486613	-0.180594	-0.0771773	0.660098	-0.294927
α-Eleostearic acid	-0.122904	-0.23431	0.24324	0.291479	-0.640444	0.576639	0.171807	-0.236657	-0.48461	-0.208738	0.0623608	-0.145884	-0.266403	0.295868	-0.14739	-0.234425	-0.040148	-0.168844	0.225839	0.051397	0.125516	0.0597254	0.385371	-0.119055	0.376188	-0.422805	0.127987	0.01257	-0.29896	-0.206261	-0.15091	-0.107497	0.0684102	-0.10071	-0.104615	0.0176214	-0.19654	-0.270508	0.219125	0.228924	-0.260644	0.0278518	0.363655	0.0572466	0.533987	-0.270894	0.328772	0.151516	0.0651947
4-Hydroxyretinoic Acid	0.0482018	0.315304	-0.442782	-0.345218	0.55964	-0.067921	0.0177663	0.201486	-0.0433082	0.255039	-0.266809	-0.164243	0.186098	-0.415932	0.275826	-0.140133	0.216955	-0.15567	-0.138983	-0.260491	0.0385363	0.36217	0.0996296	0.282885	-0.0813799	0.465154	0.0826413	-0.233517	0.0757882	-0.172549	-0.165303	0.149693	0.203826	0.303059	-0.134569	-0.223814	0.446383	-0.149154	0.0324294	0.209809	-0.144599	0.198801	0.299881	-0.264177	-0.108528	-0.0628603	0.43841	-0.180462	0.323543
LPE 22:6	0.158365	0.119815	-0.359428	0.567201	0.0700178	-0.323235	-0.560976	0.121574	0.149537	0.371179	0.299957	-0.0397304	0.230508	0.311499	0.253377	0.0918527	-0.0344809	-0.0624347	-0.332988	0.314354	0.0300518	0.0296622	-0.360146	-0.296786	0.25246	-0.403633	-0.360289	-0.161345	-0.124598	0.0985103	-0.0383336	0.0942457	-0.365943	-0.1411	0.171071	-0.220835	-0.176792	0.305591	-0.0409295	-0.411083	0.278615	-0.186026	-0.252096	0.32325	-0.007858	0.0418106	0.0181476	0.358747	-0.288402
Uric acid	0.215073	0.215151	-0.420352	0.314891	0.241306	-0.493921	-0.351022	0.0809336	-0.0598184	0.170736	0.248478	0.260617	-0.0298852	0.212216	-0.095373	0.0180226	0.318385	0.252391	-0.136343	0.274904	0.10595	0.0566231	-0.19734	-0.253154	0.268143	-0.0156022	0.0513645	0.488705	-0.188263	-0.1455	0.258809	-0.0593831	-0.0841404	-0.0637423	0.0402139	0.441598	-0.0428021	0.208268	-0.0286071	-0.327417	0.026264	-0.1235	-0.0273111	0.230972	0.200712	-0.25448	-0.0146009	0.242917	-0.280452
Glycine	-0.369105	0.0653856	0.193559	-0.0859786	-0.157525	0.173312	0.069634	-0.261816	0.0991428	0.356892	0.0885481	0.438202	0.210371	-0.0413605	0.124839	0.0725886	0.161925	0.469071	-0.0259601	0.113777	0.01966	0.0540196	0.153083	0.124385	0.191171	-0.468994	0.246274	-0.0404742	0.089248	0.251867	0.442482	-0.173096	0.0304792	0.059083	-0.0585267	-0.0280394	-0.201603	-0.207277	0.090079	0.0416633	0.284531	0.303837	0.117954	0.042667	0.512232	0.0148685	-0.0594188	-0.0552185	0.141463
LPE 18:3	0.0908188	-0.44035	0.369563	0.456302	-0.473861	0.265353	-0.30947	0.00180751	0.144655	-0.12333	0.117416	-0.188605	-0.102264	0.344065	-0.0697385	0.0189299	-0.496491	-0.258226	-0.234921	0.125322	-0.145651	-0.410408	-0.0724238	-0.370371	0.039457	-0.462962	-0.334867	-0.0105517	-0.285913	0.217999	-0.192713	0.040029	-0.261265	-0.401801	0.000383181	-0.0263437	-0.303622	0.0369438	0.00245709	-0.0659055	0.000741445	-0.376802	-0.138422	0.121062	-0.0266546	0.0175626	-0.20009	0.326314	-0.265972
Phenylacetylglycine	0.153027	-0.47933	0.398089	-0.301349	0.0850282	0.447142	-0.135231	-0.137969	0.359909	-0.136409	0.0291176	-0.0127482	-0.131106	0.175216	-0.0919802	-0.164077	-0.427614	-0.0689724	0.0613264	0.0185169	-0.335654	-0.24481	-0.0908552	0.134	-0.095031	0.199502	-0.0394311	-0.323521	-0.0200515	0.548962	-0.0169114	0.159911	-0.198925	-0.109877	-0.249398	-0.323226	0.0932463	-0.0881412	-0.149742	0.0453844	0.142711	-0.0892582	0.0270385	0.0368491	-0.19682	-0.25057	-0.183856	-0.0280732	0.181903
Methyl indole-3-acetate	0.343636	-0.429577	0.153332	0.253274	-0.251901	0.118612	0.238246	-0.327411	-0.557285	-0.271804	0.353949	0.245359	-0.186225	0.235491	-0.141462	-0.494479	0.130417	0.155856	0.296239	0.356943	-0.102125	-0.447644	-0.0616862	-0.302424	0.355815	-0.0856081	-0.187637	0.391197	-0.384715	-0.289361	0.233711	0.564511	0.0247873	-0.461361	-0.27221	0.359544	-0.088238	-0.0246034	-0.0795745	-0.00178354	-0.275215	-0.128012	0.17414	0.338259	0.144563	0.00226741	-0.109143	0.303198	-0.122774
Prostaglandin G2	0.188599	-0.170505	0.0939938	0.248474	-0.564714	0.108718	0.107274	-0.0388467	-0.267189	-0.302527	0.125952	0.130193	-0.397751	0.112643	-0.381539	0.11066	-0.176717	0.0655788	0.0594131	0.125343	-0.153047	0.0424367	0.117425	0.0201059	0.235866	-0.351478	-0.047099	0.181867	0.046335	-0.221179	0.119119	0.00653167	-0.0151064	-0.162351	-0.308359	0.187739	-0.443368	-0.05186	0.0328372	0.3052	-0.328911	-0.0973132	0.0708603	0.11828	0.457346	-0.0956865	0.175937	0.106064	-0.419369
[truncated: 20 more columns]
