# Supplementary material for: Selenium-rich royal jelly inhibits hepatocellular carcinoma through PI3K/AKT and VEGF pathways in H22 tumor-bearing mice
Source: Royal Society of Chemistry journal article supplement (doi:10.1039/d1fo01070k), 2021-01-01
Supplement: d1fo01070k18.pdf [file d1fo01070k18.pdf]

Table S1 Primers used in the experiments

| Gene name | Forward primers sequence (5' – 3') | Reverse primers sequence (5' – 3') | Gene ID |
|-----------|------------------------------------|------------------------------------|---------|
| P85       | CCCGTGCTTTTCAGATTCCAG              | TTGTTTCATGCTGTTGTTGGCTAC           | 18708   |
| AKT       | AGAGGCAGGAAGAAGAGACGATGG           | CACACGGTGCTTGGGCTTGG               | 11651   |
| Caspase-9 | ATGCTGTGTCAAGTTTGCCTACCC           | CTGCTCCAGAATGCCATCCAAGG            | 12371   |
| Caspase-3 | AGTGGGACTGATGAGGAGATGGC            | ATGCTGCAAAGGGACTGGATGAAC           | 12367   |
| PTEN      | GACCCGTGGCACTGCTGTTTC              | ACCTTTAGCTGGCAGACCACAAAC           | 19211   |
| Bcl-2     | TGATAACCGGGAGATCGTGATG             | GAAGGAAGAAGATGCCAGGGGTG            | 12043   |
| Bax       | CAGGATGCGTCCACCAAGAAAGC            | TGCCACCCGGAAGAAGACCTC              | 12028   |
| COX-2     | GGCACACGGAAAGGAAACATAGGG           | TCAACCTTGTC AACACAGCCTCAC          | 5912281 |
| VEGF      | GAAGCTACTGCCGTCCGATTGAG            | GCACTCCGAGGCTTCATCGTTAC            | 16542   |
| GAPDH     | GGTTGTCTCCTGCGACTTCA               | TGGTCCAGGGTTTCTTACTCC              | 14433   |
