# Supplementary figures and images for: Selenium-rich royal jelly inhibits hepatocellular carcinoma through PI3K/AKT and VEGF pathways in H22 tumor-bearing mice
Source: Royal Society of Chemistry journal article supplement (doi:10.1039/d1fo01070k), 2021-01-01

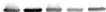

Supplement: d1fo01070k1.pdf [file d1fo01070k1.pdf]

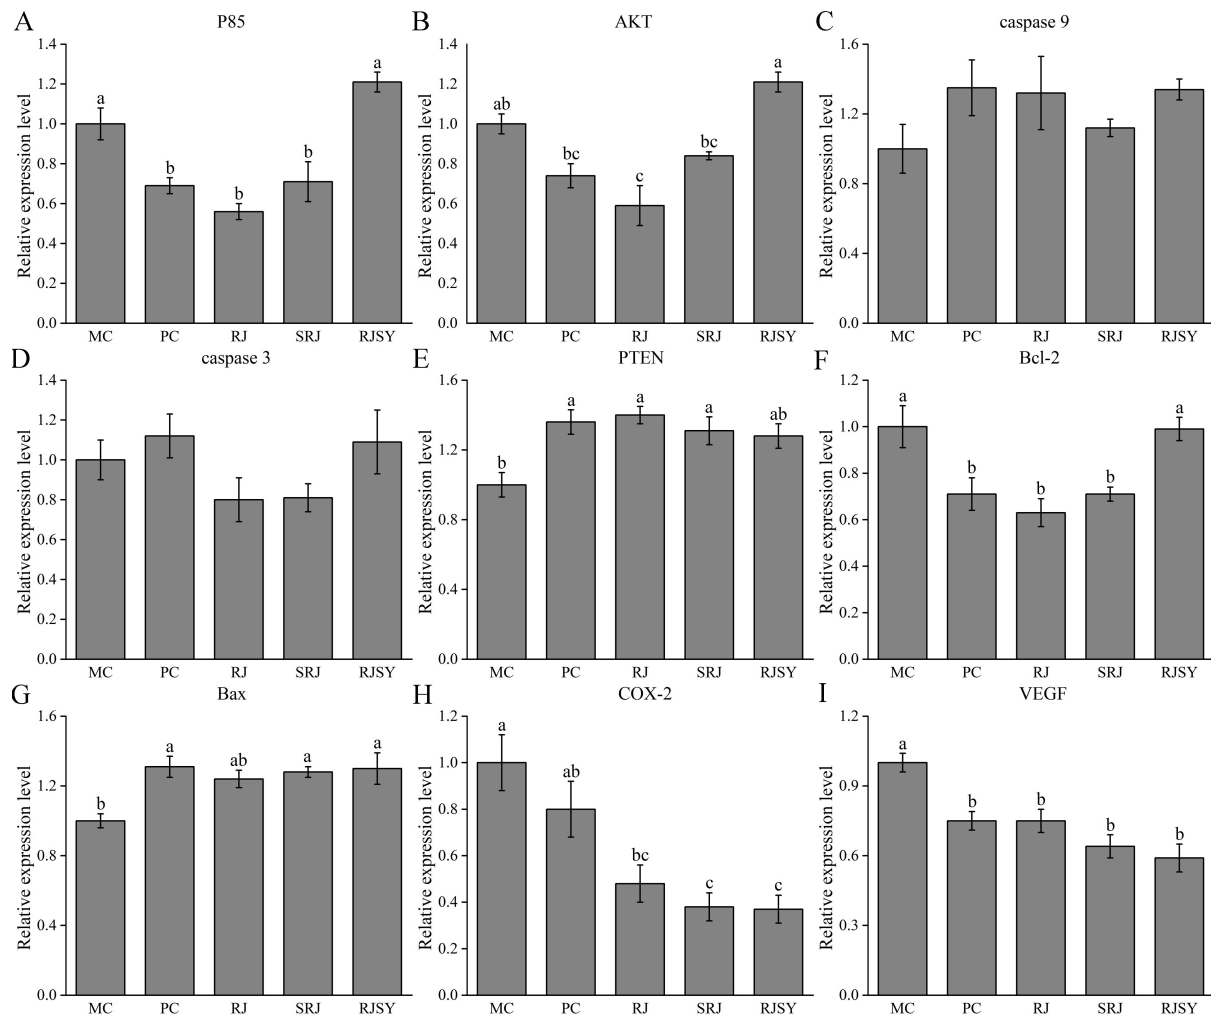

Supplement: d1fo01070k11.pdf [file d1fo01070k11.pdf]

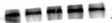

Supplement: d1fo01070k12.pdf [file d1fo01070k12.pdf]

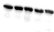

Supplement: d1fo01070k13.pdf [file d1fo01070k13.pdf]

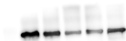

Supplement: d1fo01070k14.pdf [file d1fo01070k14.pdf]

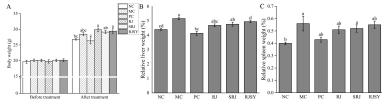

Supplement: d1fo01070k2.pdf [file d1fo01070k2.pdf]

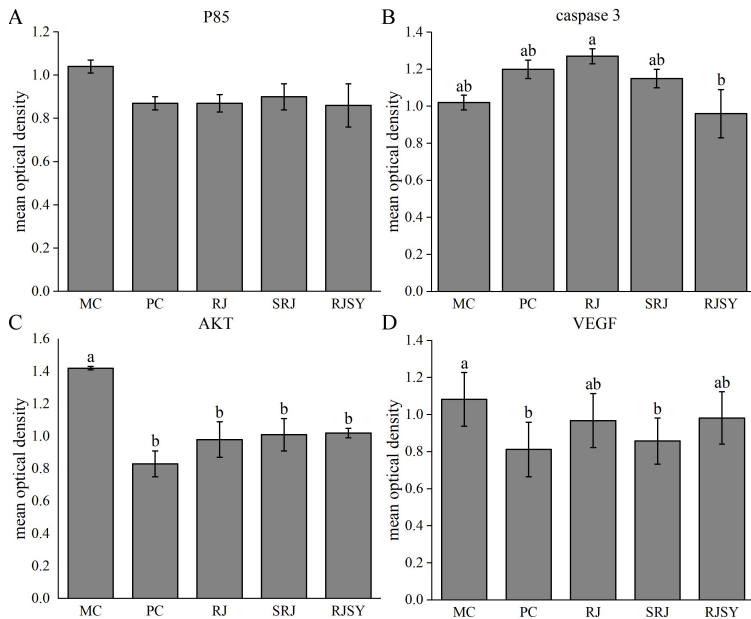

Supplement: d1fo01070k3.pdf [file d1fo01070k3.pdf]

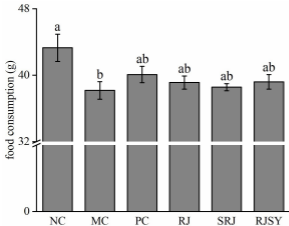

Supplement: d1fo01070k4.pdf [file d1fo01070k4.pdf]

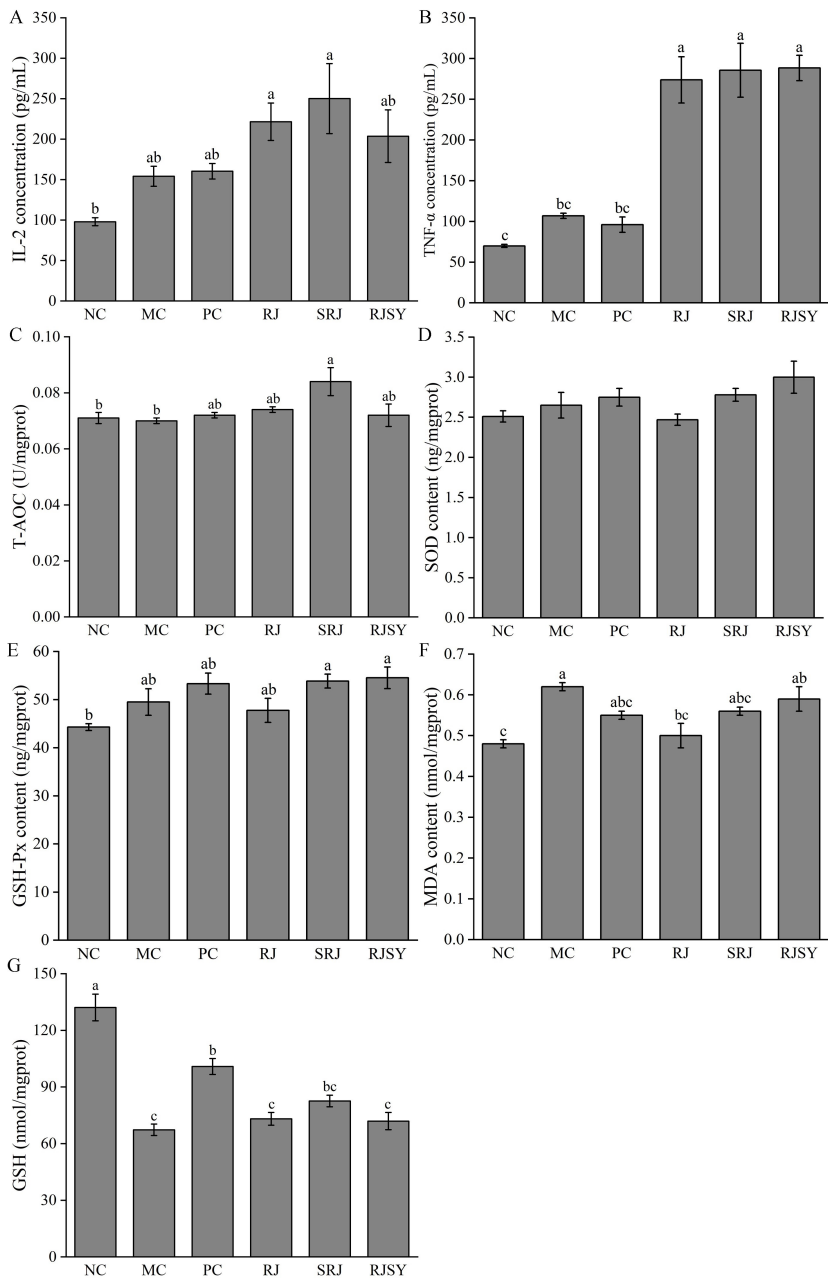

Supplement: d1fo01070k5.pdf [file d1fo01070k5.pdf]

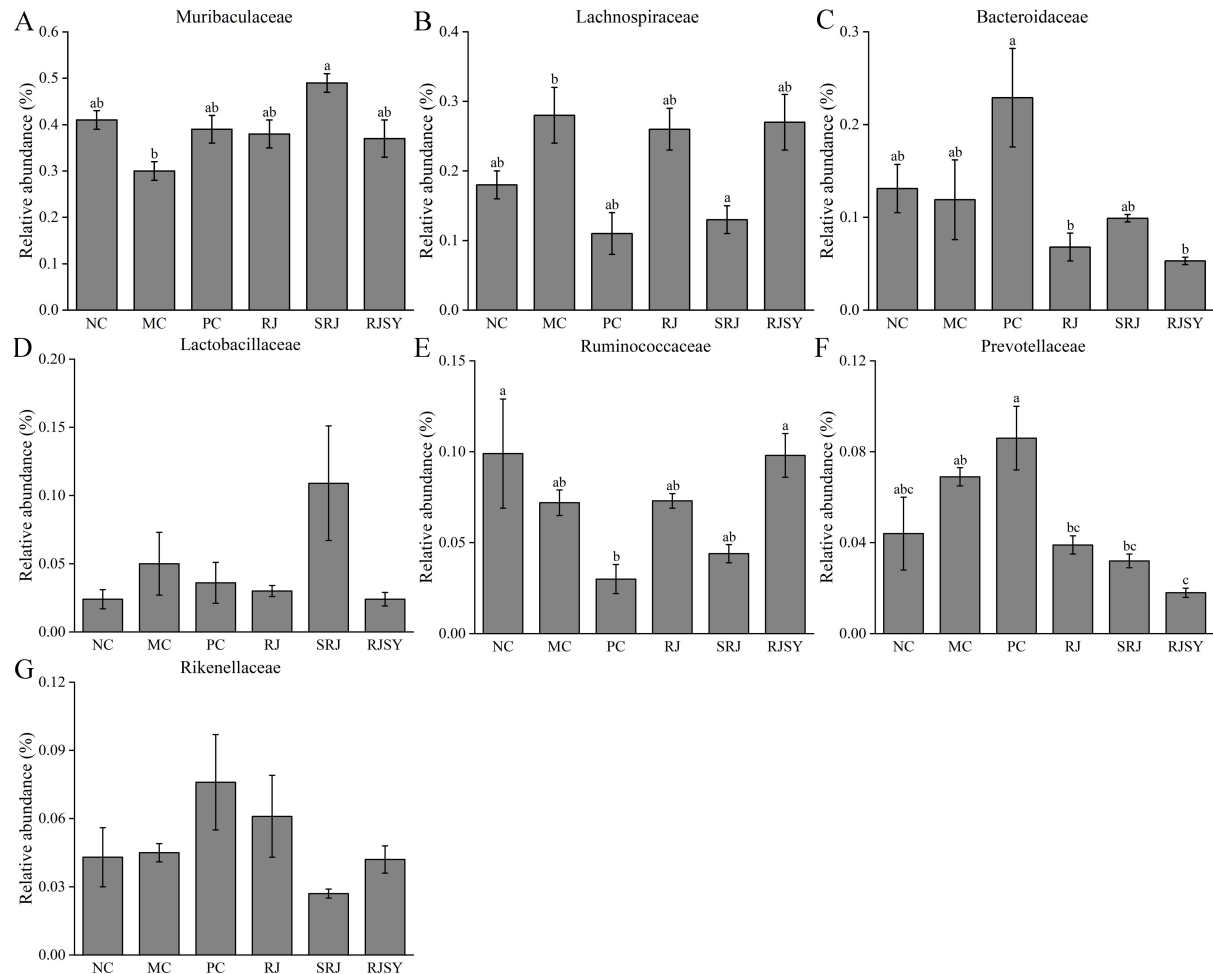

Supplement: d1fo01070k6.pdf [file d1fo01070k6.pdf]

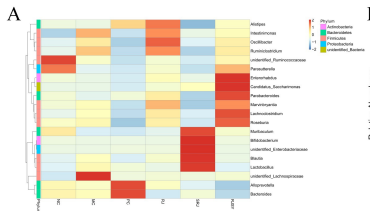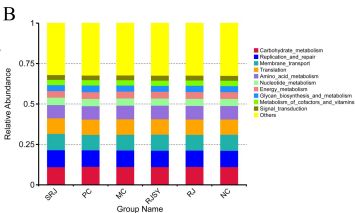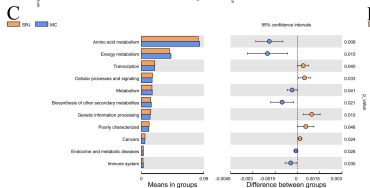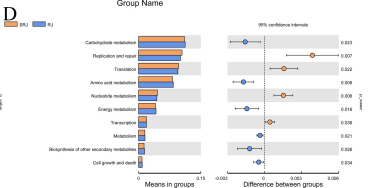

Supplement: d1fo01070k7.pdf [file d1fo01070k7.pdf]

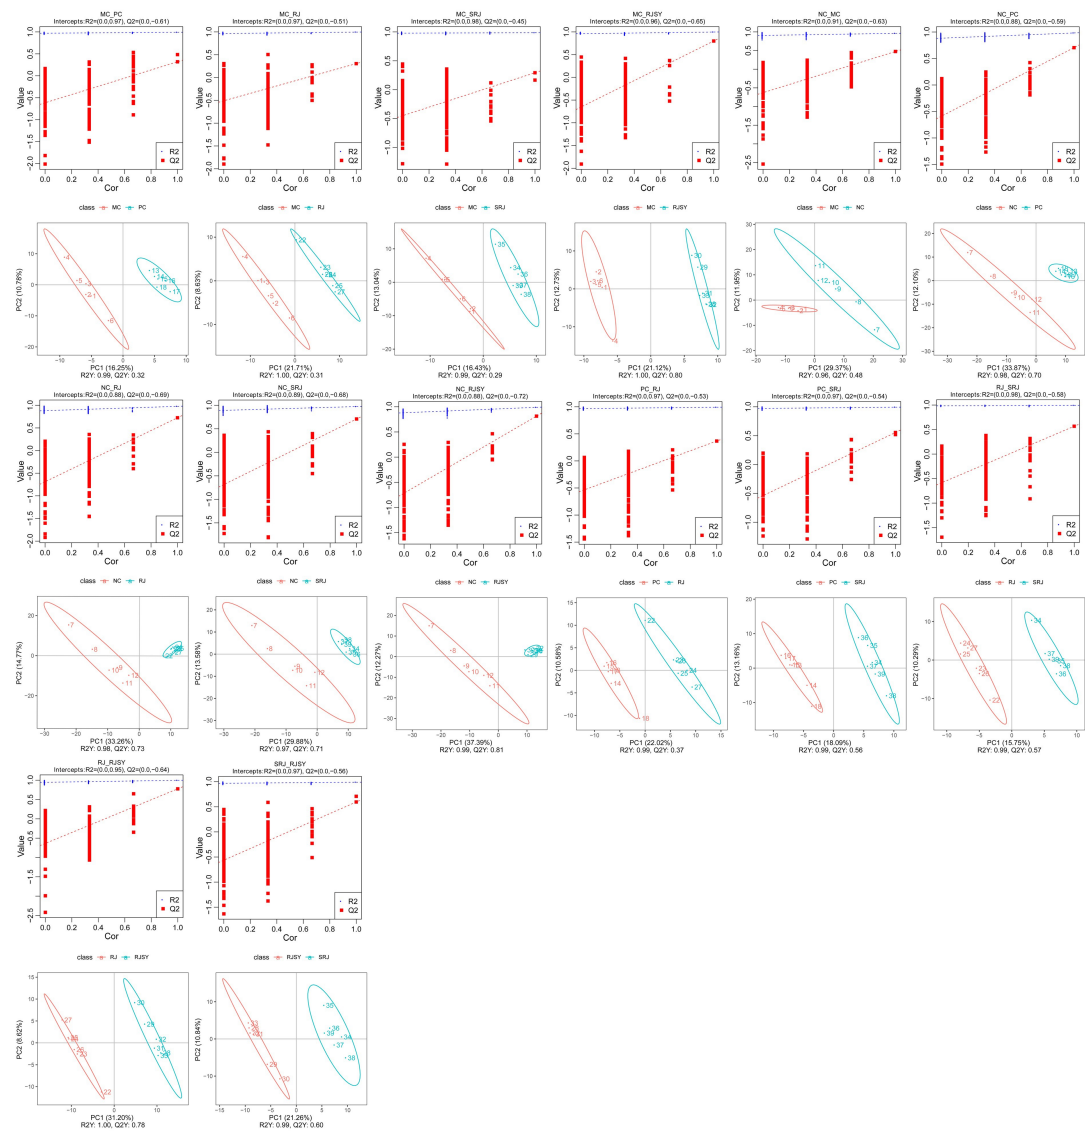

Supplement: d1fo01070k8.pdf [file d1fo01070k8.pdf]

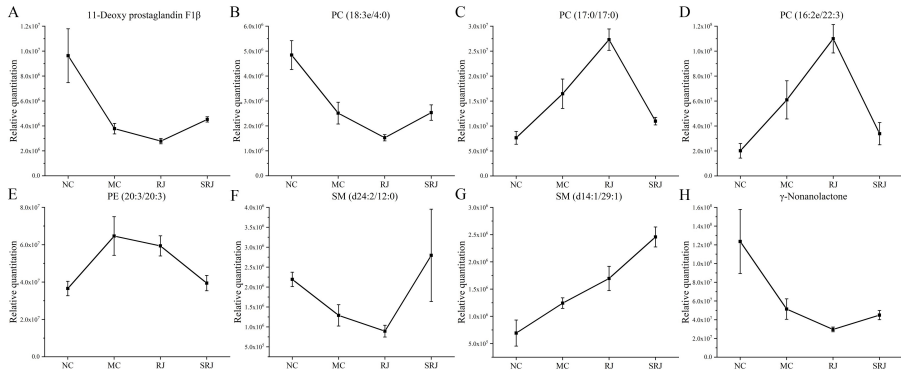

Supplement: d1fo01070k9.pdf [file d1fo01070k9.pdf]
